# Supplementary material for: Salmonids reveal principles of regulatory evolution following autotetraploidization
Source: bioRxiv preprint, doi:10.64898/2025.12.18.695160, version 2 (2025-12-23)
Supplement: Supplementary Tables [file 695160_file03.xlsx]

## Sheet: Table S1
				RNA-Seq (12 stages)	ATAC-Seq (5 stages)	ChIP-Seq (5 stages)
DEVMAP	Atlantic salmon			3 replicates	3 replicates	3 replicates, 4 Ab, 1 input/stage
	rainbow trout			3 replicates	3 replicates*	3 replicates, 4 Ab, 1 input/stage
	sub-total			72	29	130
	Total			231
				RNA-Seq (7 tissues)	ATAC-Seq (4 tissues)	ChIP-Seq (Liver, Muscle)	ChIP-Seq (Brain)	ChIP-Seq (Gonad)
BODYMAP	Atlantic salmon	Immature	Female	3 replicates	3 replicates	2 replicates, 4 Ab, 1 input/tissue	2 replicates, 4 Ab, 1 input/tissue	3 replicates, 4 Ab, 1 input/tissue
			Male	3 replicates	3 replicates	2 replicates, 4 Ab, 1 input/tissue	2 replicates, 4 Ab, 1 input/tissue	3 replicates, 4 Ab, 1 input/tissue
		Mature	Female	3 replicates	3 replicates	2 replicates, 4 Ab, 1 input/tissue	2 replicates, 4 Ab, 1 input/tissue	3 replicates, 4 Ab, 1 input/tissue
			Male	3 replicates	3 replicates	2 replicates, 4 Ab, 1 input/tissue	2 replicates, 4 Ab, 1 input/tissue	3 replicates, 4 Ab, 1 input/tissue
	rainbow trout	Immature	Female	3 replicates	3 replicates	2 replicates, 4 Ab, 1 input/tissue	1 replicate, 4 Ab, 1 input/tissue	none
			Male	3 replicates	3 replicates	2 replicates, 4 Ab, 1 input/tissue	1 replicate, 4 Ab, 1 input/tissue	none
		Mature	Female	3 replicates	3 replicates	2 replicates, 4 Ab, 1 input/tissue	2 replicates, 4 Ab, 1 input/tissue	none
			Male	3 replicates**	3 replicates	2 replicates, 4 Ab, 1 input/tissue	2 replicates, 4 Ab, 1 input/tissue	none
	sub-total			174	96	144	64	52
	Total			530

## Sheet: Table S2
	Species	RNA-Seq		ATAC-Seq		ChIP-Seq
		Accession number	Stages/Tissues	Accession number	Tissues/Stages	Accession number	Tissues/Stages
DevMap	Atlantic salmon	PRJEB51855	Late Cleavage, Early Blastula, Mid Blastula, Late Blastula, Early Gastrula, Mid Gastrula, Late Gastrula, Early Somitogenesis, Early mid-Somitogenesis, Mid Somitogenesis, Mid-late Somitogenesis, Late Somitogenesis, Early Eyed, Late Eyed (12)	PRJEB51854	Late Blastula, Mid Gastrula, Early Somitogenesis, Mid Somitogenesis, Late Somitogenesis (5)	PRJEB53399	Late Blastula, Mid Gastrula, Early Somatogenesis, Mid Somatogenesis, Late Somatogenesis (5)
	rainbow trout	PRJEB51857	Late Cleavage, Early Blastula, Mid Blastula, Late Blastula, Early Gastrula, Mid Gastrula, Late Gastrula, Early Somitogenesis, Early mid-Somitogenesis, Mid Somitogenesis, Mid-late Somitogenesis, Late Somitogenesis, Early Eyed, Late Eyed (12)	PRJEB51856	Late Blastula, Mid Gastrula, Early Somitogenesis, Mid Somitogenesis, Late Somitogenesis (5)	PRJEB55010	Late Blastula, Mid Gastrula, Early Somatogenesis, Mid Somatogenesis, Late Somatogenesis (5)
BodyMap	Atlantic salmon	PRJEB47409	Brain, Gill, Gonad, Liver, Muscle, Distal Intestine, Head Kidney (7)	PRJEB47408	Brain, Gonad, Liver, Muscle (4)	PRJEB55063	Brain, Gonad, Liver, Muscle (4)
	rainbow trout	PRJEB57191	Brain, Gill, Gonad, Liver, Muscle, Distal Intestine, Head Kidney (7)	PRJEB57190	Brain, Gonad, Liver, Muscle (4)	PRJEB57956	Brain, Liver, Muscle (3)
Table S2. Name of developmental stage (DevMap) or tissue (BodyMap) used for each assay in Atlantic salmon and rainbow trout, together with their respective accession numbers (ENA Database).
The detailed list of the 761 libraries presented in the article with their respective accession numbers and associated Biosample ID can be found in Table S3 (+ inputs from Gill (4) of Atlantic salmon, +inputs from Gill (3) and Gonad (3) of rainbow trout)

## Sheet: Table S3
Species	Category	Developmental stage / Tissue	For Tissue; Maturity	For Tissue; Sex	BioSample ID embryos (DevMap) or fish (BodyMap) or tissues pooled for inputs (A)	BioSample ID Pool of embryos (DevMap) or Tissue (BodyMap) ==> sample accesion ENA (B)	Type of assay	For ChIP-Seq: Ab used / input	Biological replicate	Code AF	Run accession ENA	Experiment accession ENA	Study accession ENA	Secondary Study accession ENA	MD5 fastq1	MD5 fastq2	Read counts	link BioSample ID (A)	link BioSample ID (B)	link Run accession ENA	link Experiment accession ENA	link Study accession ENA	link Secondary Study accession ENA
AtlanticSalmon	DevMap	Late Blastulation	n.a	n.a	SAMEA9835670	SAMEA9835779	ATAC-Seq	n.a	1	D1100101	ERR9360603	ERX8902537	PRJEB51854	ERP136504	d93e1fb4b50cc5b6c790f857fdfc300e	1d1aa534fbca98bce16710c372834cd7	64281388	https://www.ebi.ac.uk/biosamples/samples/	https://www.ebi.ac.uk/biosamples/samples/	https://www.ebi.ac.uk/ena/browser/view/	https://www.ebi.ac.uk/ena/browser/view/	https://www.ebi.ac.uk/ena/browser/view/	https://www.ebi.ac.uk/ena/browser/view/
AtlanticSalmon	DevMap	Late Blastulation	n.a	n.a	SAMEA9835670	SAMEA9835786	ATAC-Seq	n.a	2	D1100102	ERR9360604	ERX8902538	PRJEB51854	ERP136504	2d8dfa0f12e3e537c664d0594d22ee91	7132de62ee30544992aea9adb1b04c95	53479076	BioSample ID embryos (DevMap) or fish (BodyMap) or tissues pooled for inputs (A)	BioSample ID Pool of embryos (DevMap) or Tissue (BodyMap) ==> sample accesion ENA (B)	Run accession ENA	Experiment accession ENA	Study accession ENA	Secondary Study accession ENA
AtlanticSalmon	DevMap	Late Blastulation	n.a	n.a	SAMEA9835670	SAMEA9835793	ATAC-Seq	n.a	3	D1100103	ERR9360605	ERX8902539	PRJEB51854	ERP136504	7846cc7c0994e994067b8f3358e23035	df459572c51e5fb4df715613868131ed	57282652	SAMEA9835670	SAMEA9835779	ERR9360603	ERX8902537	PRJEB51854	ERP136504
AtlanticSalmon	DevMap	Mid Gastrulation	n.a	n.a	SAMEA9835672	SAMEA9835780	ATAC-Seq	n.a	1	D1100201	ERR9360606	ERX8902540	PRJEB51854	ERP136504	8662daf9f7c272e3c1d0554b34259571	939d2954b6926bd1008dc24e4e85f200	87407994	SAMEA9835670	SAMEA9835786	ERR9360604	ERX8902538	PRJEB51854	ERP136504
AtlanticSalmon	DevMap	Mid Gastrulation	n.a	n.a	SAMEA9835672	SAMEA9835787	ATAC-Seq	n.a	2	D1100202	ERR9360607	ERX8902541	PRJEB51854	ERP136504	0f2c8d6a738e59d6b75b39e6578078ea	5020573b3b991df18d355e214840b1f8	59383834	SAMEA9835670	SAMEA9835793	ERR9360605	ERX8902539	PRJEB51854	ERP136504
AtlanticSalmon	DevMap	Mid Gastrulation	n.a	n.a	SAMEA9835672	SAMEA9835794	ATAC-Seq	n.a	3	D1100203	ERR9360608	ERX8902542	PRJEB51854	ERP136504	a0bc6e232533ae38ae5b81324c0b5d28	bd23e8c78e8b1606c202548bb61baad0	60273118	SAMEA9835672	SAMEA9835780	ERR9360606	ERX8902540	PRJEB51854	ERP136504
AtlanticSalmon	DevMap	Early Somitogenesis	n.a	n.a	SAMEA9835674	SAMEA9835781	ATAC-Seq	n.a	1	D1100301	ERR9360609	ERX8902543	PRJEB51854	ERP136504	f4eede526fbbaf1c266d0db94d0668ec	94f239a558c3d320a76b554a3d81ae66	57829958	SAMEA9835672	SAMEA9835787	ERR9360607	ERX8902541	PRJEB51854	ERP136504
AtlanticSalmon	DevMap	Early Somitogenesis	n.a	n.a	SAMEA9835674	SAMEA9835788	ATAC-Seq	n.a	2	D1100302	ERR9360610	ERX8902544	PRJEB51854	ERP136504	835fe59e1f5056dfe051f6732c3298ac	e4d6986d89ef30eade613184e5e0d19a	56057076	SAMEA9835672	SAMEA9835794	ERR9360608	ERX8902542	PRJEB51854	ERP136504
AtlanticSalmon	DevMap	Early Somitogenesis	n.a	n.a	SAMEA9835674	SAMEA9835795	ATAC-Seq	n.a	3	D1100303	ERR9360611	ERX8902545	PRJEB51854	ERP136504	ba20622fb8f9c9c87b1241a1f203563d	82dc8e8393ecc8ee5e25beb7f038af6f	56315674	SAMEA9835674	SAMEA9835781	ERR9360609	ERX8902543	PRJEB51854	ERP136504
AtlanticSalmon	DevMap	Mid Somitogenesis	n.a	n.a	SAMEA9835676	SAMEA9835782	ATAC-Seq	n.a	1	D1100401	ERR9360612	ERX8902546	PRJEB51854	ERP136504	2c2e44e45e882f03410f09f216fa9c68	c3b36205b3298b067b5e249ec15191da	69619056	SAMEA9835674	SAMEA9835788	ERR9360610	ERX8902544	PRJEB51854	ERP136504
AtlanticSalmon	DevMap	Mid Somitogenesis	n.a	n.a	SAMEA9835676	SAMEA9835789	ATAC-Seq	n.a	2	D1100402	ERR9360613	ERX8902547	PRJEB51854	ERP136504	8e79a3005582bfcd4dc97cbb7c6e35b7	9270061c516d60eb108a36a8c42a5b98	72350008	SAMEA9835674	SAMEA9835795	ERR9360611	ERX8902545	PRJEB51854	ERP136504
AtlanticSalmon	DevMap	Mid Somitogenesis	n.a	n.a	SAMEA9835676	SAMEA9835796	ATAC-Seq	n.a	3	D1100403	ERR9360614	ERX8902548	PRJEB51854	ERP136504	430ee66b34ad58a9f61ccdb92039fa63	986b34b8312b871e0f98500eb6f24e26	90456722	SAMEA9835676	SAMEA9835782	ERR9360612	ERX8902546	PRJEB51854	ERP136504
AtlanticSalmon	DevMap	LateSomitogenesis	n.a	n.a	SAMEA9835678	SAMEA9835783	ATAC-Seq	n.a	1	D1100501	ERR9360615	ERX8902549	PRJEB51854	ERP136504	58cceb7787008d47fc15ad4277c7281c	b7468611e983903c1908473c0e25ba6e	57531038	SAMEA9835676	SAMEA9835789	ERR9360613	ERX8902547	PRJEB51854	ERP136504
AtlanticSalmon	DevMap	LateSomitogenesis	n.a	n.a	SAMEA9835678	SAMEA9835790	ATAC-Seq	n.a	2	D1100502	ERR9360616	ERX8902550	PRJEB51854	ERP136504	0cdd8958f0ab9d616f89f3f44ecf51f7	23c485860804f06120c733eae503c3ec	59783398	SAMEA9835676	SAMEA9835796	ERR9360614	ERX8902548	PRJEB51854	ERP136504
AtlanticSalmon	DevMap	LateSomitogenesis	n.a	n.a	SAMEA9835678	SAMEA9835797	ATAC-Seq	n.a	3	D1100503	ERR9360617	ERX8902551	PRJEB51854	ERP136504	822c2eda7bff44c76935e51d60232747	d44f92fcb050296baae32b817f18baa7	51365190	SAMEA9835678	SAMEA9835783	ERR9360615	ERX8902549	PRJEB51854	ERP136504
AtlanticSalmon	DevMap	Late Blastulation	n.a	n.a	SAMEA9835670	SAMEA9835817	ChIP-Seq	H3K27ac	1	D1200121	ERR9829781	ERX9375766	PRJEB53399	ERP138194	8a03bbd9dd589179595531853559d7c2	1c492eafaf3bb13ee78eb03bf6ab4b1a	98057060	SAMEA9835678	SAMEA9835790	ERR9360616	ERX8902550	PRJEB51854	ERP136504
AtlanticSalmon	DevMap	Late Blastulation	n.a	n.a	SAMEA9835670	SAMEA9835823	ChIP-Seq	H3K27ac	2	D1200122	ERR9829782	ERX9375767	PRJEB53399	ERP138194	3a90707948f0bf6f5b868da55a5b24dc	b0ecf412d544f62aedb1e92da901a870	100185848	SAMEA9835678	SAMEA9835797	ERR9360617	ERX8902551	PRJEB51854	ERP136504
AtlanticSalmon	DevMap	Late Blastulation	n.a	n.a	SAMEA9835670	SAMEA9835829	ChIP-Seq	H3K27ac	3	D1200123	ERR9829783	ERX9375768	PRJEB53399	ERP138194	fe7e55f23d8db97a4bec7bf614828c5a	8ebf9ec835d242ec7adcfeeb3aa359c6	100073404	SAMEA9835670	SAMEA9835817	ERR9829781	ERX9375766	PRJEB53399	ERP138194
AtlanticSalmon	DevMap	Late Blastulation	n.a	n.a	SAMEA9835670	SAMEA9835817	ChIP-Seq	H3K27me3	1	D1200131	ERR9829784	ERX9375769	PRJEB53399	ERP138194	62791b1456fd571164c8ad4a74a83147	d72e0dcadb6c3b975f0e25f38d835077	99038454	SAMEA9835670	SAMEA9835823	ERR9829782	ERX9375767	PRJEB53399	ERP138194
AtlanticSalmon	DevMap	Late Blastulation	n.a	n.a	SAMEA9835670	SAMEA9835823	ChIP-Seq	H3K27me3	2	D1200132	ERR9829785	ERX9375770	PRJEB53399	ERP138194	119c7965d62c4f34fc9a633af0fa79cf	7cada407cbc4599d7402c8b3fe26419f	181084994	SAMEA9835670	SAMEA9835829	ERR9829783	ERX9375768	PRJEB53399	ERP138194
AtlanticSalmon	DevMap	Late Blastulation	n.a	n.a	SAMEA9835670	SAMEA9835829	ChIP-Seq	H3K27me3	3	D1200133	ERR9829786	ERX9375771	PRJEB53399	ERP138194	9578b3aa04b52d5dae0229a32c5a97e0	d03f6c21a0b61d4ba10293c1cb0281f6	212079906	SAMEA9835670	SAMEA9835817	ERR9829784	ERX9375769	PRJEB53399	ERP138194
AtlanticSalmon	DevMap	Late Blastulation	n.a	n.a	SAMEA9835670	SAMEA9835817	ChIP-Seq	H3K4me1	1	D1200141	ERR9829787	ERX9375772	PRJEB53399	ERP138194	846cd12696eb115bb7ca0c1012e23a7a	2608d140bdee89cb65d629a97997e176	163085640	SAMEA9835670	SAMEA9835823	ERR9829785	ERX9375770	PRJEB53399	ERP138194
AtlanticSalmon	DevMap	Late Blastulation	n.a	n.a	SAMEA9835670	SAMEA9835823	ChIP-Seq	H3K4me1	2	D1200142	ERR9829788	ERX9375773	PRJEB53399	ERP138194	c9c54296c40eeaaf337012afcc3d674f	6cddb97b5eb68186ac496ab536b162c1	152643152	SAMEA9835670	SAMEA9835829	ERR9829786	ERX9375771	PRJEB53399	ERP138194
AtlanticSalmon	DevMap	Late Blastulation	n.a	n.a	SAMEA9835670	SAMEA9835829	ChIP-Seq	H3K4me1	3	D1200143	ERR9829789	ERX9375774	PRJEB53399	ERP138194	ae74269c2f370954b727c3b680b10e43	fa465770b7ac8199bda35c1b68c0a97b	123000992	SAMEA9835670	SAMEA9835817	ERR9829787	ERX9375772	PRJEB53399	ERP138194
AtlanticSalmon	DevMap	Late Blastulation	n.a	n.a	SAMEA9835670	SAMEA9835817	ChIP-Seq	H3K4me3	1	D1200151	ERR9829790	ERX9375775	PRJEB53399	ERP138194	9f981a030b86e8fffa3d75818f2f6d18	02b2f5fa5305c6283c2b31831f006df9	100029396	SAMEA9835670	SAMEA9835823	ERR9829788	ERX9375773	PRJEB53399	ERP138194
AtlanticSalmon	DevMap	Late Blastulation	n.a	n.a	SAMEA9835670	SAMEA9835823	ChIP-Seq	H3K4me3	2	D1200152	ERR9829791	ERX9375776	PRJEB53399	ERP138194	b1a49bdfc65550ec4a87bf3dde1e0394	8ce162fb6c5895e1a7d17c3cb9c3e920	99298956	SAMEA9835670	SAMEA9835829	ERR9829789	ERX9375774	PRJEB53399	ERP138194
AtlanticSalmon	DevMap	Late Blastulation	n.a	n.a	SAMEA9835670	SAMEA9835829	ChIP-Seq	H3K4me3	3	D1200153	ERR9829792	ERX9375777	PRJEB53399	ERP138194	5b5d058fdec07f36a5c07d154ef5c600	72ff0dd360f72441e510147d03a5b888	99595716	SAMEA9835670	SAMEA9835817	ERR9829790	ERX9375775	PRJEB53399	ERP138194
AtlanticSalmon	DevMap	Late Blastulation	n.a	n.a	SAMEA9835670	SAMEA9835817	ChIP-Seq	input	1	D1200162	ERR9829793	ERX9375778	PRJEB53399	ERP138194	595c607d695e083cbd3242e5e18407f1	cf4d192b6330ca5fff18310a22148b9b	211015762	SAMEA9835670	SAMEA9835823	ERR9829791	ERX9375776	PRJEB53399	ERP138194
AtlanticSalmon	DevMap	Mid Gastrulation	n.a	n.a	SAMEA9835672	SAMEA9835818	ChIP-Seq	H3K27ac	1	D1200221	ERR9829794	ERX9375779	PRJEB53399	ERP138194	15d2db1d7d8d25f92bc423754942a2ce	7d277988be0bde2a37be9fd69d6f50e8	95550670	SAMEA9835670	SAMEA9835829	ERR9829792	ERX9375777	PRJEB53399	ERP138194
AtlanticSalmon	DevMap	Mid Gastrulation	n.a	n.a	SAMEA9835672	SAMEA9835824	ChIP-Seq	H3K27ac	2	D1200222	ERR9829795	ERX9375780	PRJEB53399	ERP138194	296aa5c7664551b5c4cecffa355d7bb8	16bd70d2234c6440d72034ac7c646e55	100575528	SAMEA9835670	SAMEA9835817	ERR9829793	ERX9375778	PRJEB53399	ERP138194
AtlanticSalmon	DevMap	Mid Gastrulation	n.a	n.a	SAMEA9835672	SAMEA9835830	ChIP-Seq	H3K27ac	3	D1200223	ERR9829796	ERX9375781	PRJEB53399	ERP138194	eb65ad008a6390a2efda3cb58d02eb64	abf5b564dd92b8ca716c78385046e7b4	99889392	SAMEA9835672	SAMEA9835818	ERR9829794	ERX9375779	PRJEB53399	ERP138194
AtlanticSalmon	DevMap	Mid Gastrulation	n.a	n.a	SAMEA9835672	SAMEA9835818	ChIP-Seq	H3K27me3	1	D1200231	ERR9829797	ERX9375782	PRJEB53399	ERP138194	05d527419cb6f584c0f63f04254b7fa3	0eeceaee408726b6739447b8f9ccf442	98316576	SAMEA9835672	SAMEA9835824	ERR9829795	ERX9375780	PRJEB53399	ERP138194
AtlanticSalmon	DevMap	Mid Gastrulation	n.a	n.a	SAMEA9835672	SAMEA9835824	ChIP-Seq	H3K27me3	2	D1200232	ERR9829798	ERX9375783	PRJEB53399	ERP138194	e47a7a18454ad6142ad5588929680aff	af41523d1dced1c23e148a4f7f38b74b	102744496	SAMEA9835672	SAMEA9835830	ERR9829796	ERX9375781	PRJEB53399	ERP138194
AtlanticSalmon	DevMap	Mid Gastrulation	n.a	n.a	SAMEA9835672	SAMEA9835830	ChIP-Seq	H3K27me3	3	D1200233	ERR9829799	ERX9375784	PRJEB53399	ERP138194	d2a432119c180887e750663b444c29c1	24cde9eef2172d3ef61b72dcf4ac81b5	113016430	SAMEA9835672	SAMEA9835818	ERR9829797	ERX9375782	PRJEB53399	ERP138194
AtlanticSalmon	DevMap	Mid Gastrulation	n.a	n.a	SAMEA9835672	SAMEA9835818	ChIP-Seq	H3K4me1	1	D1200241	ERR9829800	ERX9375785	PRJEB53399	ERP138194	b9188049907ea7a9cef95f39e9ac3df4	f3064264ddde1e0cfebc00140f6deb5c	147302812	SAMEA9835672	SAMEA9835824	ERR9829798	ERX9375783	PRJEB53399	ERP138194
AtlanticSalmon	DevMap	Mid Gastrulation	n.a	n.a	SAMEA9835672	SAMEA9835824	ChIP-Seq	H3K4me1	2	D1200242	ERR9829801	ERX9375786	PRJEB53399	ERP138194	3dec2a008d348ddc694821ac94adf0c9	993016b815720c5651d81b1e74ebf42a	161378588	SAMEA9835672	SAMEA9835830	ERR9829799	ERX9375784	PRJEB53399	ERP138194
AtlanticSalmon	DevMap	Mid Gastrulation	n.a	n.a	SAMEA9835672	SAMEA9835830	ChIP-Seq	H3K4me1	3	D1200243	ERR9829802	ERX9375787	PRJEB53399	ERP138194	62a8a5955ac6ae830fff6f617bedfc46	3825583b957f8f818625ddb14f9471aa	134497184	SAMEA9835672	SAMEA9835818	ERR9829800	ERX9375785	PRJEB53399	ERP138194
AtlanticSalmon	DevMap	Mid Gastrulation	n.a	n.a	SAMEA9835672	SAMEA9835818	ChIP-Seq	H3K4me3	1	D1200251	ERR9829803	ERX9375788	PRJEB53399	ERP138194	6f7871ab958400eb89fe5ce84070cf55	38cd2d8172bd55068ac067947ffb2ad3	100031450	SAMEA9835672	SAMEA9835824	ERR9829801	ERX9375786	PRJEB53399	ERP138194
AtlanticSalmon	DevMap	Mid Gastrulation	n.a	n.a	SAMEA9835672	SAMEA9835824	ChIP-Seq	H3K4me3	2	D1200252	ERR9829804	ERX9375789	PRJEB53399	ERP138194	1e7a8bf003a100f49cf165b2fe3f53d1	3d0e1c3e86ae1f54125ad5ad26001d7a	99921010	SAMEA9835672	SAMEA9835830	ERR9829802	ERX9375787	PRJEB53399	ERP138194
AtlanticSalmon	DevMap	Mid Gastrulation	n.a	n.a	SAMEA9835672	SAMEA9835830	ChIP-Seq	H3K4me3	3	D1200253	ERR9829805	ERX9375790	PRJEB53399	ERP138194	6099aff4552c7f7cd16915c447aaf91d	cc06575b9ef3f9dc69c4ccf5572c4866	91635036	SAMEA9835672	SAMEA9835818	ERR9829803	ERX9375788	PRJEB53399	ERP138194
AtlanticSalmon	DevMap	Mid Gastrulation	n.a	n.a	SAMEA9835672	SAMEA9835818	ChIP-Seq	input	1	D1200262	ERR9829806	ERX9375791	PRJEB53399	ERP138194	d43dccfe09ba5f8f362ebeec7458f479	c29132a8fdbf03c1b031c2fa16d40883	194001324	SAMEA9835672	SAMEA9835824	ERR9829804	ERX9375789	PRJEB53399	ERP138194
AtlanticSalmon	DevMap	Early Somitogenesis	n.a	n.a	SAMEA9835674	SAMEA9835819	ChIP-Seq	H3K27ac	1	D1200321	ERR9829807	ERX9375792	PRJEB53399	ERP138194	ec7e4dcdf76e887e660b942989864426	16210dba36093b813adb4be8a8b1e199	91243632	SAMEA9835672	SAMEA9835830	ERR9829805	ERX9375790	PRJEB53399	ERP138194
AtlanticSalmon	DevMap	Early Somitogenesis	n.a	n.a	SAMEA9835674	SAMEA9835825	ChIP-Seq	H3K27ac	2	D1200322	ERR9829808	ERX9375793	PRJEB53399	ERP138194	e62ae87a7cb8df0b12fa2bf473e775da	3e47b8ba7308e26b3569c64613fc875a	96067216	SAMEA9835672	SAMEA9835818	ERR9829806	ERX9375791	PRJEB53399	ERP138194
AtlanticSalmon	DevMap	Early Somitogenesis	n.a	n.a	SAMEA9835674	SAMEA9835831	ChIP-Seq	H3K27ac	3	D1200323	ERR9829809	ERX9375794	PRJEB53399	ERP138194	568f95fc93a59374dd4d7a405ab293ce	e35ebd8beb8a4a44cfae56dafcad92cc	100654268	SAMEA9835674	SAMEA9835819	ERR9829807	ERX9375792	PRJEB53399	ERP138194
AtlanticSalmon	DevMap	Early Somitogenesis	n.a	n.a	SAMEA9835674	SAMEA9835819	ChIP-Seq	H3K27me3	1	D1200331	ERR9829810	ERX9375795	PRJEB53399	ERP138194	e506c4dd29b5ac32e112955bce38e4a8	d8d11e678f18296ad56738e1e6e3d88a	96168562	SAMEA9835674	SAMEA9835825	ERR9829808	ERX9375793	PRJEB53399	ERP138194
AtlanticSalmon	DevMap	Early Somitogenesis	n.a	n.a	SAMEA9835674	SAMEA9835825	ChIP-Seq	H3K27me3	2	D1200332	ERR9829811	ERX9375796	PRJEB53399	ERP138194	96b1900c8ec516d6eeca25b6b8a81ea6	2ad862cdb179ca75737ea630871bcca0	91975718	SAMEA9835674	SAMEA9835831	ERR9829809	ERX9375794	PRJEB53399	ERP138194
AtlanticSalmon	DevMap	Early Somitogenesis	n.a	n.a	SAMEA9835674	SAMEA9835831	ChIP-Seq	H3K27me3	3	D1200333	ERR9829812	ERX9375797	PRJEB53399	ERP138194	0849ad64e6d290a88c7eda9e7231e386	d2e4a969bcf659272abe66a724247236	199357126	SAMEA9835674	SAMEA9835819	ERR9829810	ERX9375795	PRJEB53399	ERP138194
AtlanticSalmon	DevMap	Early Somitogenesis	n.a	n.a	SAMEA9835674	SAMEA9835819	ChIP-Seq	H3K4me1	1	D1200341	ERR9829813	ERX9375798	PRJEB53399	ERP138194	0b3d382d2325aa651c6ef96c52c3b8c4	5967255e28668df3da0eceb978c4b6c8	161122916	SAMEA9835674	SAMEA9835825	ERR9829811	ERX9375796	PRJEB53399	ERP138194
AtlanticSalmon	DevMap	Early Somitogenesis	n.a	n.a	SAMEA9835674	SAMEA9835825	ChIP-Seq	H3K4me1	2	D1200342	ERR9829814	ERX9375799	PRJEB53399	ERP138194	2f56896aaadd0e8b2d4c3e7e7df07cc5	310cc5e6457fb46cc848c1a46ae57653	152177798	SAMEA9835674	SAMEA9835831	ERR9829812	ERX9375797	PRJEB53399	ERP138194
AtlanticSalmon	DevMap	Early Somitogenesis	n.a	n.a	SAMEA9835674	SAMEA9835831	ChIP-Seq	H3K4me1	3	D1200343	ERR9829815	ERX9375800	PRJEB53399	ERP138194	873073e60d32938723e591215b5c36d0	075ba24051bd35780b8bf14ce225524d	159507658	SAMEA9835674	SAMEA9835819	ERR9829813	ERX9375798	PRJEB53399	ERP138194
AtlanticSalmon	DevMap	Early Somitogenesis	n.a	n.a	SAMEA9835674	SAMEA9835819	ChIP-Seq	H3K4me3	1	D1200351	ERR9829816	ERX9375801	PRJEB53399	ERP138194	0133f026a424fedfeef0fa52d4b5661c	da782f416cb24b4d4b3dc3d87e3d2300	206379112	SAMEA9835674	SAMEA9835825	ERR9829814	ERX9375799	PRJEB53399	ERP138194
AtlanticSalmon	DevMap	Early Somitogenesis	n.a	n.a	SAMEA9835674	SAMEA9835825	ChIP-Seq	H3K4me3	2	D1200352	ERR9829817	ERX9375802	PRJEB53399	ERP138194	1c0ce9c08007404c39221febf9136045	991e3142ae9c4e905c3d4bfb8a80a47a	114438520	SAMEA9835674	SAMEA9835831	ERR9829815	ERX9375800	PRJEB53399	ERP138194
AtlanticSalmon	DevMap	Early Somitogenesis	n.a	n.a	SAMEA9835674	SAMEA9835831	ChIP-Seq	H3K4me3	3	D1200353	ERR9829818	ERX9375803	PRJEB53399	ERP138194	587fbb2eafa183b230fd163fe400c2fc	048726f5916d093ce5ba4d040c77b268	112202916	SAMEA9835674	SAMEA9835819	ERR9829816	ERX9375801	PRJEB53399	ERP138194
AtlanticSalmon	DevMap	Early Somitogenesis	n.a	n.a	SAMEA9835674	SAMEA9835819	ChIP-Seq	input	1	D1200362	ERR9829819	ERX9375804	PRJEB53399	ERP138194	d1ab3847590e79ec2b3c45e91533a5af	1d4f3589c356c87d97bb5ef85958e925	191674502	SAMEA9835674	SAMEA9835825	ERR9829817	ERX9375802	PRJEB53399	ERP138194
AtlanticSalmon	DevMap	Mid Somitogenesis	n.a	n.a	SAMEA9835676	SAMEA9835820	ChIP-Seq	H3K27ac	1	D1200421	ERR9829820	ERX9375805	PRJEB53399	ERP138194	c6ddef5801dfe7e2ca972e40a72f4cee	a432793f87b0af6090d2dab9cfc60d47	191320502	SAMEA9835674	SAMEA9835831	ERR9829818	ERX9375803	PRJEB53399	ERP138194
AtlanticSalmon	DevMap	Mid Somitogenesis	n.a	n.a	SAMEA9835676	SAMEA9835826	ChIP-Seq	H3K27ac	2	D1200422	ERR9829821	ERX9375806	PRJEB53399	ERP138194	9bdbaaab8f75ab333ebc65d1a1e4fc94	e1266d5021d36d4fff467b5a85b4897e	105549460	SAMEA9835674	SAMEA9835819	ERR9829819	ERX9375804	PRJEB53399	ERP138194
AtlanticSalmon	DevMap	Mid Somitogenesis	n.a	n.a	SAMEA9835676	SAMEA9835832	ChIP-Seq	H3K27ac	3	D1200423	ERR9829822	ERX9375807	PRJEB53399	ERP138194	35ce926cf1c2142981a822ac55a00b7e	875c842a5294546dceceae3a7ff8f919	90267750	SAMEA9835676	SAMEA9835820	ERR9829820	ERX9375805	PRJEB53399	ERP138194
AtlanticSalmon	DevMap	Mid Somitogenesis	n.a	n.a	SAMEA9835676	SAMEA9835820	ChIP-Seq	H3K27me3	1	D1200431	ERR9829823	ERX9375808	PRJEB53399	ERP138194	a062a6c43717129b96daed25e681748d	2a53dc620006e227c85505e5a7583d08	90194896	SAMEA9835676	SAMEA9835826	ERR9829821	ERX9375806	PRJEB53399	ERP138194
AtlanticSalmon	DevMap	Mid Somitogenesis	n.a	n.a	SAMEA9835676	SAMEA9835826	ChIP-Seq	H3K27me3	2	D1200432	ERR9829824	ERX9375809	PRJEB53399	ERP138194	d596a2cb17f547be3db7e7e8ccb681cd	8e56847befeffab18cd9262dbcabe8cf	215646128	SAMEA9835676	SAMEA9835832	ERR9829822	ERX9375807	PRJEB53399	ERP138194
AtlanticSalmon	DevMap	Mid Somitogenesis	n.a	n.a	SAMEA9835676	SAMEA9835832	ChIP-Seq	H3K27me3	3	D1200433	ERR9829825	ERX9375810	PRJEB53399	ERP138194	08b02a805e19ef2480b78e33fd0c9783	bb460d5f7e94a9acc3121d895062d682	230818864	SAMEA9835676	SAMEA9835820	ERR9829823	ERX9375808	PRJEB53399	ERP138194
AtlanticSalmon	DevMap	Mid Somitogenesis	n.a	n.a	SAMEA9835676	SAMEA9835820	ChIP-Seq	H3K4me1	1	D1200441	ERR9829826	ERX9375811	PRJEB53399	ERP138194	c606cb178d4cae1304ffc69b6f1a9da9	743e1f2a4af882d8a7857454cd84db32	135226512	SAMEA9835676	SAMEA9835826	ERR9829824	ERX9375809	PRJEB53399	ERP138194
AtlanticSalmon	DevMap	Mid Somitogenesis	n.a	n.a	SAMEA9835676	SAMEA9835826	ChIP-Seq	H3K4me1	2	D1200442	ERR9829827	ERX9375812	PRJEB53399	ERP138194	096b429af051885cfbf6d621a5c88b43	7bf4af3dfaf592b78c68c08a07088b25	116492406	SAMEA9835676	SAMEA9835832	ERR9829825	ERX9375810	PRJEB53399	ERP138194
AtlanticSalmon	DevMap	Mid Somitogenesis	n.a	n.a	SAMEA9835676	SAMEA9835832	ChIP-Seq	H3K4me1	3	D1200443	ERR9829828	ERX9375813	PRJEB53399	ERP138194	af5f83f566badddf0d2f6e8ec017d5fe	9c23e1ac9372695560958d8133f3906d	137551530	SAMEA9835676	SAMEA9835820	ERR9829826	ERX9375811	PRJEB53399	ERP138194
AtlanticSalmon	DevMap	Mid Somitogenesis	n.a	n.a	SAMEA9835676	SAMEA9835820	ChIP-Seq	H3K4me3	1	D1200451	ERR9829829	ERX9375814	PRJEB53399	ERP138194	6f83d8fca90d9be9bf8ebe6648d977a7	c493799e43c0e7d91bfb2f764e9b52fe	109742506	SAMEA9835676	SAMEA9835826	ERR9829827	ERX9375812	PRJEB53399	ERP138194
AtlanticSalmon	DevMap	Mid Somitogenesis	n.a	n.a	SAMEA9835676	SAMEA9835826	ChIP-Seq	H3K4me3	2	D1200452	ERR9829830	ERX9375815	PRJEB53399	ERP138194	a318fd26fc642721ec8f29e4baac5383	d753f99db8892e5b0de31be96ad37e92	109946942	SAMEA9835676	SAMEA9835832	ERR9829828	ERX9375813	PRJEB53399	ERP138194
AtlanticSalmon	DevMap	Mid Somitogenesis	n.a	n.a	SAMEA9835676	SAMEA9835832	ChIP-Seq	H3K4me3	3	D1200453	ERR9829831	ERX9375816	PRJEB53399	ERP138194	224a7f48b1b12dde724b2cd4057f39a5	fb5b8828d6290cf43fad96d7861bb34f	112497008	SAMEA9835676	SAMEA9835820	ERR9829829	ERX9375814	PRJEB53399	ERP138194
AtlanticSalmon	DevMap	Mid Somitogenesis	n.a	n.a	SAMEA9835676	SAMEA9835820	ChIP-Seq	input	1	D1200462	ERR9829832	ERX9375817	PRJEB53399	ERP138194	8457d66a3872a1c5ff2992984e5b4241	c0fd4d12a427341034d0c586005f7333	207313874	SAMEA9835676	SAMEA9835826	ERR9829830	ERX9375815	PRJEB53399	ERP138194
AtlanticSalmon	DevMap	LateSomitogenesis	n.a	n.a	SAMEA9835678	SAMEA9835821	ChIP-Seq	H3K27ac	1	D1200521	ERR9829833	ERX9375818	PRJEB53399	ERP138194	936247bb3107135ef398cf97b84d8f6c	7268ebb7f3dd2cd344b8dd48f2852e43	194839534	SAMEA9835676	SAMEA9835832	ERR9829831	ERX9375816	PRJEB53399	ERP138194
AtlanticSalmon	DevMap	LateSomitogenesis	n.a	n.a	SAMEA9835678	SAMEA9835827	ChIP-Seq	H3K27ac	2	D1200522	ERR9829834	ERX9375819	PRJEB53399	ERP138194	4c87012066e66c3bc727d7eba0b90b22	b106c1f6a8eb890b399ee48edc61ec15	106574400	SAMEA9835676	SAMEA9835820	ERR9829832	ERX9375817	PRJEB53399	ERP138194
AtlanticSalmon	DevMap	LateSomitogenesis	n.a	n.a	SAMEA9835678	SAMEA9835833	ChIP-Seq	H3K27ac	3	D1200523	ERR9829835	ERX9375820	PRJEB53399	ERP138194	b52ac01c4fa75a555698f2d5c0e3b281	76972fc24d6aa9c4b5bb891c24f08d8e	189939104	SAMEA9835678	SAMEA9835821	ERR9829833	ERX9375818	PRJEB53399	ERP138194
AtlanticSalmon	DevMap	LateSomitogenesis	n.a	n.a	SAMEA9835678	SAMEA9835821	ChIP-Seq	H3K27me3	1	D1200531	ERR9829836	ERX9375821	PRJEB53399	ERP138194	822761ba6311735054b10614fd11c2e6	c44d0f1070412ae75e1914ecc94d8e03	111366344	SAMEA9835678	SAMEA9835827	ERR9829834	ERX9375819	PRJEB53399	ERP138194
AtlanticSalmon	DevMap	LateSomitogenesis	n.a	n.a	SAMEA9835678	SAMEA9835827	ChIP-Seq	H3K27me3	2	D1200532	ERR9829837	ERX9375822	PRJEB53399	ERP138194	ff797af7fe1b994292fb0ebb4562a2d7	095908e51c2803f19d11c8ca8bccba8b	200823880	SAMEA9835678	SAMEA9835833	ERR9829835	ERX9375820	PRJEB53399	ERP138194
AtlanticSalmon	DevMap	LateSomitogenesis	n.a	n.a	SAMEA9835678	SAMEA9835833	ChIP-Seq	H3K27me3	3	D1200533	ERR9829838	ERX9375823	PRJEB53399	ERP138194	8d231f397f4daaf4f3ec120e67f8a538	e56c5f4122c635ef1af748ff8a5acc17	271721300	SAMEA9835678	SAMEA9835821	ERR9829836	ERX9375821	PRJEB53399	ERP138194
AtlanticSalmon	DevMap	LateSomitogenesis	n.a	n.a	SAMEA9835678	SAMEA9835821	ChIP-Seq	H3K4me1	1	D1200541	ERR9829839	ERX9375824	PRJEB53399	ERP138194	e3ec1a528f92f64f4588545abe3dcf04	c9b8e321b4e7e2a453642ca84bd3dfce	141975874	SAMEA9835678	SAMEA9835827	ERR9829837	ERX9375822	PRJEB53399	ERP138194
AtlanticSalmon	DevMap	LateSomitogenesis	n.a	n.a	SAMEA9835678	SAMEA9835827	ChIP-Seq	H3K4me1	2	D1200542	ERR9829840	ERX9375825	PRJEB53399	ERP138194	8d5598a02589f2194057b6ff85a740fb	11133aac9b1779ddd41bd2fbd10fe128	130126814	SAMEA9835678	SAMEA9835833	ERR9829838	ERX9375823	PRJEB53399	ERP138194
AtlanticSalmon	DevMap	LateSomitogenesis	n.a	n.a	SAMEA9835678	SAMEA9835833	ChIP-Seq	H3K4me1	3	D1200543	ERR9829841	ERX9375826	PRJEB53399	ERP138194	2542b936dbb937304ea3f7100eb734c9	580b9b88b02b4cef38a88d26f5fc3614	107128716	SAMEA9835678	SAMEA9835821	ERR9829839	ERX9375824	PRJEB53399	ERP138194
AtlanticSalmon	DevMap	LateSomitogenesis	n.a	n.a	SAMEA9835678	SAMEA9835821	ChIP-Seq	H3K4me3	1	D1200551	ERR9829842	ERX9375827	PRJEB53399	ERP138194	1e7723d40ae9fa89ca30a11a673f4a23	b5d7c5136aa69312a6a460b590f43130	111040478	SAMEA9835678	SAMEA9835827	ERR9829840	ERX9375825	PRJEB53399	ERP138194
AtlanticSalmon	DevMap	LateSomitogenesis	n.a	n.a	SAMEA9835678	SAMEA9835827	ChIP-Seq	H3K4me3	2	D1200552	ERR9829843	ERX9375828	PRJEB53399	ERP138194	9f082b62a0b41308abfbcb58e0e8a1a4	cd2b44d4b730e9ad53c7fb5e02f6ddb0	91330216	SAMEA9835678	SAMEA9835833	ERR9829841	ERX9375826	PRJEB53399	ERP138194
AtlanticSalmon	DevMap	LateSomitogenesis	n.a	n.a	SAMEA9835678	SAMEA9835833	ChIP-Seq	H3K4me3	3	D1200553	ERR9829844	ERX9375829	PRJEB53399	ERP138194	c05e4f05d602c82283f7ed0592b0045e	e754b697f99cee19c7f84c6611736a70	105819166	SAMEA9835678	SAMEA9835821	ERR9829842	ERX9375827	PRJEB53399	ERP138194
AtlanticSalmon	DevMap	LateSomitogenesis	n.a	n.a	SAMEA9835678	SAMEA9835821	ChIP-Seq	input	1	D1200562	ERR9829845	ERX9375830	PRJEB53399	ERP138194	257b5ee07ef662ced8ba05cc71a26556	83e0bc21d14c21b7779bc792510d2ae5	189193100	SAMEA9835678	SAMEA9835827	ERR9829843	ERX9375828	PRJEB53399	ERP138194
AtlanticSalmon	DevMap	Late Blastulation	n.a	n.a	SAMEA9835670	SAMEA9835698	RNA-Seq	reverse	1	D1300101	ERR9360561	ERX8902495	PRJEB51855	ERP136505	9a3b28cdad40b305cf7dda2336efeea0	055dbf0797f894bfd7ae2abb3decfd19	62972778	SAMEA9835678	SAMEA9835833	ERR9829844	ERX9375829	PRJEB53399	ERP138194
AtlanticSalmon	DevMap	Late Blastulation	n.a	n.a	SAMEA9835670	SAMEA9835726	RNA-Seq	reverse	2	D1300102	ERR9360562	ERX8902496	PRJEB51855	ERP136505	d7e3a4345171751b8e9aed538c0a3dfa	a56d1992edc8bdeda331365e9ee25a7b	61699396	SAMEA9835678	SAMEA9835821	ERR9829845	ERX9375830	PRJEB53399	ERP138194
AtlanticSalmon	DevMap	Late Blastulation	n.a	n.a	SAMEA9835670	SAMEA9835754	RNA-Seq	reverse	3	D1300103	ERR9360563	ERX8902497	PRJEB51855	ERP136505	c9f1ca16de35f35eaf6777579de055f0	ae574c72e607378466880b7e45d0a55e	123188838	SAMEA9835670	SAMEA9835698	ERR9360561	ERX8902495	PRJEB51855	ERP136505
AtlanticSalmon	DevMap	Mid Gastrulation	n.a	n.a	SAMEA9835672	SAMEA9835700	RNA-Seq	reverse	1	D1300201	ERR9360564	ERX8902498	PRJEB51855	ERP136505	3d94e7a1810e1a029d0ed2bf795383ed	111de8b71fc681427afa211f6a4ae223	65902202	SAMEA9835670	SAMEA9835726	ERR9360562	ERX8902496	PRJEB51855	ERP136505
AtlanticSalmon	DevMap	Mid Gastrulation	n.a	n.a	SAMEA9835672	SAMEA9835728	RNA-Seq	reverse	2	D1300202	ERR9360565	ERX8902499	PRJEB51855	ERP136505	17301e599221cff48f0689c889064d72	7a9549ec0c77ad6b1f0986e2c8a5ab50	58847714	SAMEA9835670	SAMEA9835754	ERR9360563	ERX8902497	PRJEB51855	ERP136505
AtlanticSalmon	DevMap	Mid Gastrulation	n.a	n.a	SAMEA9835672	SAMEA9835756	RNA-Seq	reverse	3	D1300203	ERR9360566	ERX8902500	PRJEB51855	ERP136505	1f1453e43413eb743a71b445f073a672	b8bb36e13ec3b8cbfcf2bad4235c765c	61695356	SAMEA9835672	SAMEA9835700	ERR9360564	ERX8902498	PRJEB51855	ERP136505
AtlanticSalmon	DevMap	Early Somitogenesis	n.a	n.a	SAMEA9835674	SAMEA9835702	RNA-Seq	reverse	1	D1300301	ERR9360567	ERX8902501	PRJEB51855	ERP136505	aa81a8273c5e7eda1be7c3869b67340f	edd5b3a1e54a478bbfe10a2539539d2c	65481754	SAMEA9835672	SAMEA9835728	ERR9360565	ERX8902499	PRJEB51855	ERP136505
AtlanticSalmon	DevMap	Early Somitogenesis	n.a	n.a	SAMEA9835674	SAMEA9835730	RNA-Seq	reverse	2	D1300302	ERR9360568	ERX8902502	PRJEB51855	ERP136505	3e6279861efea0e53e349829432dae7b	254d54fcfa9f97c13edaacdf5906c7d6	60541686	SAMEA9835672	SAMEA9835756	ERR9360566	ERX8902500	PRJEB51855	ERP136505
AtlanticSalmon	DevMap	Early Somitogenesis	n.a	n.a	SAMEA9835674	SAMEA9835758	RNA-Seq	reverse	3	D1300303	ERR9360569	ERX8902503	PRJEB51855	ERP136505	9a8955ddc166e36baabe6cbbeef00b42	df6113d5e19027ad41ead0ed4a17a505	62474616	SAMEA9835674	SAMEA9835702	ERR9360567	ERX8902501	PRJEB51855	ERP136505
AtlanticSalmon	DevMap	Mid Somitogenesis	n.a	n.a	SAMEA9835676	SAMEA9835704	RNA-Seq	reverse	1	D1300401	ERR9360570	ERX8902504	PRJEB51855	ERP136505	b575dad4b6d8b9e055bc9d45e39bc55c	bab528c83e3613ad55e39696d593eafc	62179874	SAMEA9835674	SAMEA9835730	ERR9360568	ERX8902502	PRJEB51855	ERP136505
AtlanticSalmon	DevMap	Mid Somitogenesis	n.a	n.a	SAMEA9835676	SAMEA9835732	RNA-Seq	reverse	2	D1300402	ERR9360571	ERX8902505	PRJEB51855	ERP136505	4b91d99ca14459c9b3579623e34a7d1e	b35f13c3695a0e4f2c9d14ca7fa8ae55	73694268	SAMEA9835674	SAMEA9835758	ERR9360569	ERX8902503	PRJEB51855	ERP136505
AtlanticSalmon	DevMap	Mid Somitogenesis	n.a	n.a	SAMEA9835676	SAMEA9835760	RNA-Seq	reverse	3	D1300403	ERR9360572	ERX8902506	PRJEB51855	ERP136505	15cdc84ce75bba07e4809de68fb1feb1	3c85c17028ab1bfa70b83b6b5e488f12	64308462	SAMEA9835676	SAMEA9835704	ERR9360570	ERX8902504	PRJEB51855	ERP136505
AtlanticSalmon	DevMap	LateSomitogenesis	n.a	n.a	SAMEA9835678	SAMEA9835706	RNA-Seq	reverse	1	D1300501	ERR9360573	ERX8902507	PRJEB51855	ERP136505	97c5b6ec762c8f744e11e549354d442e	e100eda195efad1ab5a47d37a7828954	78947374	SAMEA9835676	SAMEA9835732	ERR9360571	ERX8902505	PRJEB51855	ERP136505
AtlanticSalmon	DevMap	LateSomitogenesis	n.a	n.a	SAMEA9835678	SAMEA9835734	RNA-Seq	reverse	2	D1300502	ERR9360574	ERX8902508	PRJEB51855	ERP136505	fd71fc0185179ed45989f7a823cb42cf	ddf7a30383537b4a6109b3398b42e48a	65162106	SAMEA9835676	SAMEA9835760	ERR9360572	ERX8902506	PRJEB51855	ERP136505
AtlanticSalmon	DevMap	LateSomitogenesis	n.a	n.a	SAMEA9835678	SAMEA9835762	RNA-Seq	reverse	3	D1300503	ERR9360575	ERX8902509	PRJEB51855	ERP136505	2a6fb8ed43bc1e0b887fbf8658900fdb	80704d25172e6e9a94f569194db053a7	63537286	SAMEA9835678	SAMEA9835706	ERR9360573	ERX8902507	PRJEB51855	ERP136505
AtlanticSalmon	DevMap	LateCleavage	n.a	n.a	SAMEA9835667	SAMEA9835695	RNA-Seq	reverse	1	D1300701	ERR9360579	ERX8902513	PRJEB51855	ERP136505	46b5db85f650ea88310a96e1c84924a9	6cbcebe5648fe361cfcb35b6c062acca	60310068	SAMEA9835678	SAMEA9835734	ERR9360574	ERX8902508	PRJEB51855	ERP136505
AtlanticSalmon	DevMap	LateCleavage	n.a	n.a	SAMEA9835667	SAMEA9835723	RNA-Seq	reverse	2	D1300702	ERR9360580	ERX8902514	PRJEB51855	ERP136505	5f05647f6b3f4347788f0fdd8d10f60d	4b2f14ad7e034c708de666e4068207fa	56727824	SAMEA9835678	SAMEA9835762	ERR9360575	ERX8902509	PRJEB51855	ERP136505
AtlanticSalmon	DevMap	LateCleavage	n.a	n.a	SAMEA9835667	SAMEA9835751	RNA-Seq	reverse	3	D1300703	ERR9360581	ERX8902515	PRJEB51855	ERP136505	6766a1068a4bd5fbb695bb8b63186ca5	368b628113948727f5c92b1d988471be	63728588	SAMEA9835667	SAMEA9835695	ERR9360579	ERX8902513	PRJEB51855	ERP136505
AtlanticSalmon	DevMap	EarlyBlastulation	n.a	n.a	SAMEA9835668	SAMEA9835696	RNA-Seq	reverse	1	D1300801	ERR9360582	ERX8902516	PRJEB51855	ERP136505	3862b92d3619450fb4a327227aa7e775	83d902a1755392eb04f58438ea9fcbb4	120952408	SAMEA9835667	SAMEA9835723	ERR9360580	ERX8902514	PRJEB51855	ERP136505
AtlanticSalmon	DevMap	EarlyBlastulation	n.a	n.a	SAMEA9835668	SAMEA9835724	RNA-Seq	reverse	2	D1300802	ERR9360583	ERX8902517	PRJEB51855	ERP136505	1b22cb0424e28c5a1b18a951aaf4f4b5	e088cb9da590a34da5de29fbac31fe42	73092416	SAMEA9835667	SAMEA9835751	ERR9360581	ERX8902515	PRJEB51855	ERP136505
AtlanticSalmon	DevMap	EarlyBlastulation	n.a	n.a	SAMEA9835668	SAMEA9835752	RNA-Seq	reverse	3	D1300803	ERR9360584	ERX8902518	PRJEB51855	ERP136505	0e8601b808ab38e5ae853c5560e96d15	03c95faaca434386114478412d11e30c	127817870	SAMEA9835668	SAMEA9835696	ERR9360582	ERX8902516	PRJEB51855	ERP136505
AtlanticSalmon	DevMap	MidBlastulation	n.a	n.a	SAMEA9835669	SAMEA9835697	RNA-Seq	reverse	1	D1300901	ERR9360585	ERX8902519	PRJEB51855	ERP136505	5fd0205dbc36f9b3c7afb641d1c47294	6f7d2a4b28005fb8aea9053e302eb6e8	62994286	SAMEA9835668	SAMEA9835724	ERR9360583	ERX8902517	PRJEB51855	ERP136505
AtlanticSalmon	DevMap	MidBlastulation	n.a	n.a	SAMEA9835669	SAMEA9835725	RNA-Seq	reverse	2	D1300902	ERR9360586	ERX8902520	PRJEB51855	ERP136505	cbf6aad6040e3249c9994168a7af3d2e	057f7cf13b7de1e924fcd7f61752914f	62107448	SAMEA9835668	SAMEA9835752	ERR9360584	ERX8902518	PRJEB51855	ERP136505
AtlanticSalmon	DevMap	MidBlastulation	n.a	n.a	SAMEA9835669	SAMEA9835753	RNA-Seq	reverse	3	D1300903	ERR9360587	ERX8902521	PRJEB51855	ERP136505	22d33ec186fde97f7ae96e3434a0efe3	454da9e584810770e4da62537368b8f5	117793794	SAMEA9835669	SAMEA9835697	ERR9360585	ERX8902519	PRJEB51855	ERP136505
AtlanticSalmon	DevMap	EarlyGastrulation	n.a	n.a	SAMEA9835671	SAMEA9835699	RNA-Seq	reverse	1	D1301001	ERR9360588	ERX8902522	PRJEB51855	ERP136505	29eea9f2d253300d8360da3b9423ce8b	f45d3f2c59539ff32b0e3ada45769a68	61330024	SAMEA9835669	SAMEA9835725	ERR9360586	ERX8902520	PRJEB51855	ERP136505
AtlanticSalmon	DevMap	EarlyGastrulation	n.a	n.a	SAMEA9835671	SAMEA9835727	RNA-Seq	reverse	2	D1301002	ERR9360589	ERX8902523	PRJEB51855	ERP136505	773b20e3dec0e3b8585c4b61039de61c	de10e5cbd25c5c9fac09a3e6789aecb5	62515606	SAMEA9835669	SAMEA9835753	ERR9360587	ERX8902521	PRJEB51855	ERP136505
AtlanticSalmon	DevMap	EarlyGastrulation	n.a	n.a	SAMEA9835671	SAMEA9835755	RNA-Seq	reverse	3	D1301003	ERR9360590	ERX8902524	PRJEB51855	ERP136505	297ef87c78676948f8d69e661afc0069	365b54b7b5d3cba3d793646a1a49da2f	61011026	SAMEA9835671	SAMEA9835699	ERR9360588	ERX8902522	PRJEB51855	ERP136505
AtlanticSalmon	DevMap	LateGastrulation	n.a	n.a	SAMEA9835673	SAMEA9835701	RNA-Seq	reverse	1	D1301101	ERR9360591	ERX8902525	PRJEB51855	ERP136505	4e9487beb9355719b2a1bd8dbafab8b3	4e7ed40e3f95ca0a5e3f9e748b8301ca	66409820	SAMEA9835671	SAMEA9835727	ERR9360589	ERX8902523	PRJEB51855	ERP136505
AtlanticSalmon	DevMap	LateGastrulation	n.a	n.a	SAMEA9835673	SAMEA9835729	RNA-Seq	reverse	2	D1301102	ERR9360592	ERX8902526	PRJEB51855	ERP136505	639005bf1f6c3765936487c9b6f050b1	2e409c9c70580590b6eb553761ca0a7a	63876390	SAMEA9835671	SAMEA9835755	ERR9360590	ERX8902524	PRJEB51855	ERP136505
AtlanticSalmon	DevMap	LateGastrulation	n.a	n.a	SAMEA9835673	SAMEA9835757	RNA-Seq	reverse	3	D1301103	ERR9360593	ERX8902527	PRJEB51855	ERP136505	265eaf19559dac4b61502ba63ab451d0	b51db203e4272bbf06f03ad718c68045	64133792	SAMEA9835673	SAMEA9835701	ERR9360591	ERX8902525	PRJEB51855	ERP136505
AtlanticSalmon	DevMap	EarlyMid Somitogenesis	n.a	n.a	SAMEA9835675	SAMEA9835703	RNA-Seq	reverse	1	D1301201	ERR9360594	ERX8902528	PRJEB51855	ERP136505	517737607397623ab4045b2508458031	f74513563629ca7a52aec616e0885e65	62884240	SAMEA9835673	SAMEA9835729	ERR9360592	ERX8902526	PRJEB51855	ERP136505
AtlanticSalmon	DevMap	EarlyMid Somitogenesis	n.a	n.a	SAMEA9835675	SAMEA9835731	RNA-Seq	reverse	2	D1301202	ERR9360595	ERX8902529	PRJEB51855	ERP136505	c71664f56e82ead973942021802d4fb4	de1f6fde942730c896180e8aed91d201	63132674	SAMEA9835673	SAMEA9835757	ERR9360593	ERX8902527	PRJEB51855	ERP136505
AtlanticSalmon	DevMap	EarlyMid Somitogenesis	n.a	n.a	SAMEA9835675	SAMEA9835759	RNA-Seq	reverse	3	D1301203	ERR9360596	ERX8902530	PRJEB51855	ERP136505	c2de28258f9989406b81d3b7ae541783	774bea02e04018583f7f9ced3619eb06	67098632	SAMEA9835675	SAMEA9835703	ERR9360594	ERX8902528	PRJEB51855	ERP136505
AtlanticSalmon	DevMap	MidLateSomitogenesis	n.a	n.a	SAMEA9835677	SAMEA9835705	RNA-Seq	reverse	1	D1301301	ERR9360597	ERX8902531	PRJEB51855	ERP136505	c6a757b6d5842b137e0e7cdd576a05a3	2680b3d30088fe86a127926415de9716	63943332	SAMEA9835675	SAMEA9835731	ERR9360595	ERX8902529	PRJEB51855	ERP136505
AtlanticSalmon	DevMap	MidLateSomitogenesis	n.a	n.a	SAMEA9835677	SAMEA9835733	RNA-Seq	reverse	2	D1301302	ERR9360598	ERX8902532	PRJEB51855	ERP136505	e4933b36e736b80d1bf49a9e8ae2869d	19cfd6c011daab834311c8b3cc2565c3	62615924	SAMEA9835675	SAMEA9835759	ERR9360596	ERX8902530	PRJEB51855	ERP136505
AtlanticSalmon	DevMap	MidLateSomitogenesis	n.a	n.a	SAMEA9835677	SAMEA9835761	RNA-Seq	reverse	3	D1301303	ERR9360599	ERX8902533	PRJEB51855	ERP136505	1fb777b4fcf6ddc254cfbbaf53feca0e	4d0adbe146df70484161d0708b827dd1	63323908	SAMEA9835677	SAMEA9835705	ERR9360597	ERX8902531	PRJEB51855	ERP136505
AtlanticSalmon	BodyMap	Brain	Immature	Female	SAMEA9253111	SAMEA9253159	ATAC-Seq	n.a	1	C1110101	ERR6663862	ERX6289093	PRJEB47408	ERP131681	9c02858ec8774c14c440507aac4aec32	dfa9e8043520aeef2f718f46c6c69031	93440292	SAMEA9835677	SAMEA9835733	ERR9360598	ERX8902532	PRJEB51855	ERP136505
AtlanticSalmon	BodyMap	Gonad	Immature	Female	SAMEA9253111	SAMEA9253161	ATAC-Seq	n.a	1	C1110103	ERR6663864	ERX6289095	PRJEB47408	ERP131681	9bd74447d94a36a19be6a4c926565777	3e0ec5c63f697ea8915a6ec0e94eedea	129258600	SAMEA9835677	SAMEA9835761	ERR9360599	ERX8902533	PRJEB51855	ERP136505
AtlanticSalmon	BodyMap	Liver	Immature	Female	SAMEA9253111	SAMEA9253163	ATAC-Seq	n.a	1	C1110105	ERR6663865	ERX6289096	PRJEB47408	ERP131681	e2b6c526d6c27ad98dc785a02f78c337	2a1f595eee553b39c299d50356bbc962	97777728	SAMEA9253111	SAMEA9253159	ERR6663862	ERX6289093	PRJEB47408	ERP131681
AtlanticSalmon	BodyMap	Muscle	Immature	Female	SAMEA9253111	SAMEA9253164	ATAC-Seq	n.a	1	C1110106	ERR6663866	ERX6289097	PRJEB47408	ERP131681	0637c13d6b1b08e4b4d096c7cd923dea	ca4e2e4f559c0e3e206d8af5fc760cc6	99353348	SAMEA9253111	SAMEA9253161	ERR6663864	ERX6289095	PRJEB47408	ERP131681
AtlanticSalmon	BodyMap	Brain	Immature	Female	SAMEA9253112	SAMEA9253166	ATAC-Seq	n.a	2	C1110201	ERR6663867	ERX6289098	PRJEB47408	ERP131681	b589b15e2e63fc17cb481d575d2586db	d117bd6b7f767e08bbbf9de3b7c83a3b	103997078	SAMEA9253111	SAMEA9253163	ERR6663865	ERX6289096	PRJEB47408	ERP131681
AtlanticSalmon	BodyMap	Gonad	Immature	Female	SAMEA9253112	SAMEA9253169	ATAC-Seq	n.a	2	C1110203	ERR6663869	ERX6289100	PRJEB47408	ERP131681	518eb7d8226111e23d62b27dd988f134	6e56fce0483e29eaf7e522a87396475f	134793066	SAMEA9253111	SAMEA9253164	ERR6663866	ERX6289097	PRJEB47408	ERP131681
AtlanticSalmon	BodyMap	Liver	Immature	Female	SAMEA9253112	SAMEA9253171	ATAC-Seq	n.a	2	C1110205	ERR6663870	ERX6289101	PRJEB47408	ERP131681	aa473918a5c22e1fb5deeb757886f794	b755fcc2ec9003253e4606083e30b3c0	68481038	SAMEA9253112	SAMEA9253166	ERR6663867	ERX6289098	PRJEB47408	ERP131681
AtlanticSalmon	BodyMap	Muscle	Immature	Female	SAMEA9253112	SAMEA9253172	ATAC-Seq	n.a	2	C1110206	ERR6663871	ERX6289102	PRJEB47408	ERP131681	14fb129a24a7d42f4e8d1ebfd04935bb	17629ac170ea59e70cbf638ad37c8049	70696240	SAMEA9253112	SAMEA9253169	ERR6663869	ERX6289100	PRJEB47408	ERP131681
AtlanticSalmon	BodyMap	Brain	Immature	Female	SAMEA9253113	SAMEA9253174	ATAC-Seq	n.a	3	C1110301	ERR6663872	ERX6289073	PRJEB47408	ERP131681	5c132d4ba2b34af870a0218942121c56	b56d19de91737c1fe3aeff791b533eeb	103142326	SAMEA9253112	SAMEA9253171	ERR6663870	ERX6289101	PRJEB47408	ERP131681
AtlanticSalmon	BodyMap	Gonad	Immature	Female	SAMEA9253113	SAMEA9253176	ATAC-Seq	n.a	3	C1110303	ERR6663874	ERX6289075	PRJEB47408	ERP131681	2a87887afd678815bf64059d729fdd36	586093aca0a4134328ae5f598b3fd2a0	90233332	SAMEA9253112	SAMEA9253172	ERR6663871	ERX6289102	PRJEB47408	ERP131681
AtlanticSalmon	BodyMap	Liver	Immature	Female	SAMEA9253113	SAMEA9253178	ATAC-Seq	n.a	3	C1110305	ERR6663875	ERX6289076	PRJEB47408	ERP131681	bfb970e000b8b456f53ef44340d8c0cc	2a8cabc2e82808ff7057ff360f225fcf	114382510	SAMEA9253113	SAMEA9253174	ERR6663872	ERX6289073	PRJEB47408	ERP131681
AtlanticSalmon	BodyMap	Muscle	Immature	Female	SAMEA9253113	SAMEA9253179	ATAC-Seq	n.a	3	C1110306	ERR6663876	ERX6289077	PRJEB47408	ERP131681	ce28d4040656f587c920b1459ee1e747	e4a7f5126f601b182001940d61def65c	112388172	SAMEA9253113	SAMEA9253176	ERR6663874	ERX6289075	PRJEB47408	ERP131681
AtlanticSalmon	BodyMap	Brain	Immature	Male	SAMEA9253114	SAMEA9253181	ATAC-Seq	n.a	1	C1120101	ERR6663877	ERX6289078	PRJEB47408	ERP131681	63c6f34ec3a356effa5a52d01527756f	e2655dcca9ac6939172c32d0f9c96c6f	118723236	SAMEA9253113	SAMEA9253178	ERR6663875	ERX6289076	PRJEB47408	ERP131681
AtlanticSalmon	BodyMap	Gonad	Immature	Male	SAMEA9253114	SAMEA9253183	ATAC-Seq	n.a	1	C1120103	ERR6663879	ERX6289080	PRJEB47408	ERP131681	9be19347f13f326ee659a55ccdbfccd6	a0e3ed15aaf2355735fb8a22f6b69f0b	93858906	SAMEA9253113	SAMEA9253179	ERR6663876	ERX6289077	PRJEB47408	ERP131681
AtlanticSalmon	BodyMap	Liver	Immature	Male	SAMEA9253114	SAMEA9253185	ATAC-Seq	n.a	1	C1120105	ERR6663880	ERX6289081	PRJEB47408	ERP131681	7431ce73666aeed695d21170242a0273	b91d513469f8966bbdbe90268e47693a	82041994	SAMEA9253114	SAMEA9253181	ERR6663877	ERX6289078	PRJEB47408	ERP131681
AtlanticSalmon	BodyMap	Muscle	Immature	Male	SAMEA9253114	SAMEA9253186	ATAC-Seq	n.a	1	C1120106	ERR6663881	ERX6289082	PRJEB47408	ERP131681	dc9b1449d8d479d6203bd5eb07ab0572	aadbe28189fc39d43a24a6a3f4ce6c5d	78774116	SAMEA9253114	SAMEA9253183	ERR6663879	ERX6289080	PRJEB47408	ERP131681
AtlanticSalmon	BodyMap	Brain	Immature	Male	SAMEA9253115	SAMEA9253188	ATAC-Seq	n.a	2	C1120201	ERR6663882	ERX6289083	PRJEB47408	ERP131681	584f2955a0496c65e346e20444a99147	d06e63c613feb0419d2dd458c76710a5	104819184	SAMEA9253114	SAMEA9253185	ERR6663880	ERX6289081	PRJEB47408	ERP131681
AtlanticSalmon	BodyMap	Gonad	Immature	Male	SAMEA9253115	SAMEA9253190	ATAC-Seq	n.a	2	C1120203	ERR6663884	ERX6289085	PRJEB47408	ERP131681	089247543e6e1529d6970bb857824c97	6dd082dadc1ea42a1e6f9d1de04f717e	65071410	SAMEA9253114	SAMEA9253186	ERR6663881	ERX6289082	PRJEB47408	ERP131681
AtlanticSalmon	BodyMap	Liver	Immature	Male	SAMEA9253115	SAMEA9253192	ATAC-Seq	n.a	2	C1120205	ERR6663885	ERX6289086	PRJEB47408	ERP131681	ff7f53cb7270e6e15318cdc6ca004511	f88e016caded025bdb4f0b4de2ef661f	91587984	SAMEA9253115	SAMEA9253188	ERR6663882	ERX6289083	PRJEB47408	ERP131681
AtlanticSalmon	BodyMap	Muscle	Immature	Male	SAMEA9253115	SAMEA9253193	ATAC-Seq	n.a	2	C1120206	ERR6663886	ERX6289087	PRJEB47408	ERP131681	ea3c741ae8ce54e1a9c09c1e0cf6e1c4	0a8e2f511bb03e7f29c39f926a8e0f4b	95539958	SAMEA9253115	SAMEA9253190	ERR6663884	ERX6289085	PRJEB47408	ERP131681
AtlanticSalmon	BodyMap	Brain	Immature	Male	SAMEA9253116	SAMEA9253195	ATAC-Seq	n.a	3	C1120301	ERR6663887	ERX6289088	PRJEB47408	ERP131681	2c663471f8ef47f68708de8188c1f3aa	d89304273ced321bbdbc8cc4bcd2e6ba	101474020	SAMEA9253115	SAMEA9253192	ERR6663885	ERX6289086	PRJEB47408	ERP131681
AtlanticSalmon	BodyMap	Gonad	Immature	Male	SAMEA9253116	SAMEA9253197	ATAC-Seq	n.a	3	C1120303	ERR6663889	ERX6289090	PRJEB47408	ERP131681	e3732a39ac622a9519f63efc4e61ee14	3c67c9ac217bf7329c8d2955d24ced64	96036548	SAMEA9253115	SAMEA9253193	ERR6663886	ERX6289087	PRJEB47408	ERP131681
AtlanticSalmon	BodyMap	Liver	Immature	Male	SAMEA9253116	SAMEA9253199	ATAC-Seq	n.a	3	C1120305	ERR6663890	ERX6289091	PRJEB47408	ERP131681	476e49ebbfa86564021d3a6aab2da2d5	fd5af8fead16a2be625f7e12d2ca9f50	116057610	SAMEA9253116	SAMEA9253195	ERR6663887	ERX6289088	PRJEB47408	ERP131681
AtlanticSalmon	BodyMap	Muscle	Immature	Male	SAMEA9253116	SAMEA9253200	ATAC-Seq	n.a	3	C1120306	ERR6663891	ERX6289092	PRJEB47408	ERP131681	f409e1cec10fe99f8852826166cf63cf	292bf377be19810bc02fefbfd5e15cac	79520122	SAMEA9253116	SAMEA9253197	ERR6663889	ERX6289090	PRJEB47408	ERP131681
AtlanticSalmon	BodyMap	Brain	Mature	Female	SAMEA9253105	SAMEA9253117	ATAC-Seq	n.a	1	C1130401	ERR6663892	ERX6289043	PRJEB47408	ERP131681	2c6b31f194d102f5baaa56dfc2e7ed9d	dfb51b96d45d133a0df3144ba2ef3213	86254028	SAMEA9253116	SAMEA9253199	ERR6663890	ERX6289091	PRJEB47408	ERP131681
AtlanticSalmon	BodyMap	Gonad	Mature	Female	SAMEA9253105	SAMEA9253119	ATAC-Seq	n.a	1	C1130403	ERR6663894	ERX6289045	PRJEB47408	ERP131681	f73973844cdfc8f485274e50569be0d1	b278e129815d3dc10b5e3635ff4bc981	101550244	SAMEA9253116	SAMEA9253200	ERR6663891	ERX6289092	PRJEB47408	ERP131681
AtlanticSalmon	BodyMap	Liver	Mature	Female	SAMEA9253105	SAMEA9253121	ATAC-Seq	n.a	1	C1130405	ERR6663895	ERX6289046	PRJEB47408	ERP131681	3bd8a99fb422dbe5c899bb3bda2c8d38	5b8d9da960919f5074b1d32762d1aae1	126266130	SAMEA9253105	SAMEA9253117	ERR6663892	ERX6289043	PRJEB47408	ERP131681
AtlanticSalmon	BodyMap	Muscle	Mature	Female	SAMEA9253105	SAMEA9253122	ATAC-Seq	n.a	1	C1130406	ERR6663896	ERX6289047	PRJEB47408	ERP131681	c29485dcff3dde3ee148d94861330fb5	5d0fd515451a7713f28aa845fbaed25f	94635692	SAMEA9253105	SAMEA9253119	ERR6663894	ERX6289045	PRJEB47408	ERP131681
AtlanticSalmon	BodyMap	Brain	Mature	Female	SAMEA9253106	SAMEA9253124	ATAC-Seq	n.a	2	C1130501	ERR6663897	ERX6289048	PRJEB47408	ERP131681	8f01432123df2a7b99d5f43b05e83cc2	18a8cb95b830896947f18f1503d5077d	96898426	SAMEA9253105	SAMEA9253121	ERR6663895	ERX6289046	PRJEB47408	ERP131681
AtlanticSalmon	BodyMap	Gonad	Mature	Female	SAMEA9253106	SAMEA9253126	ATAC-Seq	n.a	2	C1130503	ERR6663899	ERX6289050	PRJEB47408	ERP131681	d539f901f7b0e83311c7f3f1406ebb98	08f6e82aa84d7bfd97197f3e98fdf918	98055250	SAMEA9253105	SAMEA9253122	ERR6663896	ERX6289047	PRJEB47408	ERP131681
AtlanticSalmon	BodyMap	Liver	Mature	Female	SAMEA9253106	SAMEA9253128	ATAC-Seq	n.a	2	C1130505	ERR6663900	ERX6289051	PRJEB47408	ERP131681	4a1cc9aaeec4ef60db775c63ee995642	a6e66841364680fb33c2f19e034e55d5	91443002	SAMEA9253106	SAMEA9253124	ERR6663897	ERX6289048	PRJEB47408	ERP131681
AtlanticSalmon	BodyMap	Muscle	Mature	Female	SAMEA9253106	SAMEA9253129	ATAC-Seq	n.a	2	C1130506	ERR6663901	ERX6289052	PRJEB47408	ERP131681	a1ec85bb2989cae5862ec586f4916197	78a73e7b4d29c15b2f2e1a4a6ffab258	94643470	SAMEA9253106	SAMEA9253126	ERR6663899	ERX6289050	PRJEB47408	ERP131681
AtlanticSalmon	BodyMap	Brain	Mature	Female	SAMEA9253107	SAMEA9253131	ATAC-Seq	n.a	3	C1130601	ERR6663902	ERX6289068	PRJEB47408	ERP131681	350d7fb0b9b8a0307b86c85cf6ff7746	222a19b5805e6affc174667696dbba4b	91607498	SAMEA9253106	SAMEA9253128	ERR6663900	ERX6289051	PRJEB47408	ERP131681
AtlanticSalmon	BodyMap	Gonad	Mature	Female	SAMEA9253107	SAMEA9253133	ATAC-Seq	n.a	3	C1130603	ERR6663904	ERX6289070	PRJEB47408	ERP131681	101cf1bf83c255339d260e0066f48ab6	57f958e623edc43794551c6cb528a42f	99387468	SAMEA9253106	SAMEA9253129	ERR6663901	ERX6289052	PRJEB47408	ERP131681
AtlanticSalmon	BodyMap	Liver	Mature	Female	SAMEA9253107	SAMEA9253135	ATAC-Seq	n.a	3	C1130605	ERR6663905	ERX6289071	PRJEB47408	ERP131681	acdcc272e81a624aa5a85f4c7c63edba	435c2cc0b62ea5b5421de663907a5e54	108945134	SAMEA9253107	SAMEA9253131	ERR6663902	ERX6289068	PRJEB47408	ERP131681
AtlanticSalmon	BodyMap	Muscle	Mature	Female	SAMEA9253107	SAMEA9253136	ATAC-Seq	n.a	3	C1130606	ERR6663906	ERX6289072	PRJEB47408	ERP131681	30ab9bd48d2d238ab6fabbf41ed62648	4f475215c458e787b9ca298e8b7392f7	111664258	SAMEA9253107	SAMEA9253133	ERR6663904	ERX6289070	PRJEB47408	ERP131681
AtlanticSalmon	BodyMap	Brain	Mature	Male	SAMEA9253108	SAMEA9253138	ATAC-Seq	n.a	1	C1140401	ERR6663907	ERX6289053	PRJEB47408	ERP131681	f6691e3737d7abf109c116da9201efa2	3b66dc892644879db8f294eb9cf7c879	90552144	SAMEA9253107	SAMEA9253135	ERR6663905	ERX6289071	PRJEB47408	ERP131681
AtlanticSalmon	BodyMap	Gonad	Mature	Male	SAMEA9253108	SAMEA9253140	ATAC-Seq	n.a	1	C1140403	ERR6663909	ERX6289055	PRJEB47408	ERP131681	0550e41aeadc9e83ad114828c0a1ea45	20d88b7c0c3bd9a1352692bc4103906b	97953068	SAMEA9253107	SAMEA9253136	ERR6663906	ERX6289072	PRJEB47408	ERP131681
AtlanticSalmon	BodyMap	Liver	Mature	Male	SAMEA9253108	SAMEA9253142	ATAC-Seq	n.a	1	C1140405	ERR6663910	ERX6289056	PRJEB47408	ERP131681	b4a3269cef99752fcac7e7c0143e9ffe	8cad76700fc3ed46053fe3715df90157	92233812	SAMEA9253108	SAMEA9253138	ERR6663907	ERX6289053	PRJEB47408	ERP131681
AtlanticSalmon	BodyMap	Muscle	Mature	Male	SAMEA9253108	SAMEA9253143	ATAC-Seq	n.a	1	C1140406	ERR6663911	ERX6289057	PRJEB47408	ERP131681	0378ea78171cdfb27ba3ff8ade4d7150	df59014a94795b3194e94ae4bb2f559f	105504920	SAMEA9253108	SAMEA9253140	ERR6663909	ERX6289055	PRJEB47408	ERP131681
AtlanticSalmon	BodyMap	Brain	Mature	Male	SAMEA9253109	SAMEA9253145	ATAC-Seq	n.a	2	C1140501	ERR6663912	ERX6289058	PRJEB47408	ERP131681	4bf9210bbff001e693825b5769734409	e108f02b5b39c5f29e38797e19100d85	94419612	SAMEA9253108	SAMEA9253142	ERR6663910	ERX6289056	PRJEB47408	ERP131681
AtlanticSalmon	BodyMap	Gonad	Mature	Male	SAMEA9253109	SAMEA9253147	ATAC-Seq	n.a	2	C1140503	ERR6663914	ERX6289060	PRJEB47408	ERP131681	95746503faed01d19f5c431e0bb402ec	52da8c436e42fc7beeaf8184223cfe4d	80049192	SAMEA9253108	SAMEA9253143	ERR6663911	ERX6289057	PRJEB47408	ERP131681
AtlanticSalmon	BodyMap	Liver	Mature	Male	SAMEA9253109	SAMEA9253149	ATAC-Seq	n.a	2	C1140505	ERR6663915	ERX6289061	PRJEB47408	ERP131681	103a2ed6e29537b8726292b812de6eca	6c6865895c1eb94a4bf0bba4e4cca92a	101030058	SAMEA9253109	SAMEA9253145	ERR6663912	ERX6289058	PRJEB47408	ERP131681
AtlanticSalmon	BodyMap	Muscle	Mature	Male	SAMEA9253109	SAMEA9253150	ATAC-Seq	n.a	2	C1140506	ERR6663916	ERX6289062	PRJEB47408	ERP131681	e4817cfeb0a95115f28e8569d68d3174	a86f7a3b63b9eb3cc426585b16936c5f	103359042	SAMEA9253109	SAMEA9253147	ERR6663914	ERX6289060	PRJEB47408	ERP131681
AtlanticSalmon	BodyMap	Brain	Mature	Male	SAMEA9253110	SAMEA9253152	ATAC-Seq	n.a	3	C1140601	ERR6663917	ERX6289063	PRJEB47408	ERP131681	7d1cc288547ed7df0c29855696d1c4a2	fcde9b24021e7e71958bb84b9747950b	96355530	SAMEA9253109	SAMEA9253149	ERR6663915	ERX6289061	PRJEB47408	ERP131681
AtlanticSalmon	BodyMap	Gonad	Mature	Male	SAMEA9253110	SAMEA9253154	ATAC-Seq	n.a	3	C1140603	ERR6663919	ERX6289065	PRJEB47408	ERP131681	fbec4acfc891d342dfd6a991bbd6072c	08b4d6fe16cef6388faabaf4225e7894	108862248	SAMEA9253109	SAMEA9253150	ERR6663916	ERX6289062	PRJEB47408	ERP131681
AtlanticSalmon	BodyMap	Liver	Mature	Male	SAMEA9253110	SAMEA9253156	ATAC-Seq	n.a	3	C1140605	ERR6663920	ERX6289066	PRJEB47408	ERP131681	556aab8da634e60dfc025bdde77afe85	d4bb74601cca18349984059a70577523	81925376	SAMEA9253110	SAMEA9253152	ERR6663917	ERX6289063	PRJEB47408	ERP131681
AtlanticSalmon	BodyMap	Muscle	Mature	Male	SAMEA9253110	SAMEA9253157	ATAC-Seq	n.a	3	C1140606	ERR6663921	ERX6289067	PRJEB47408	ERP131681	b69b6a084584803f34568ffece1c0104	f5e3b159e1755ed24657e5fe5da61a70	123160268	SAMEA9253110	SAMEA9253154	ERR6663919	ERX6289065	PRJEB47408	ERP131681
AtlanticSalmon	BodyMap	Brain	Immature	Female	SAMEA9253111	SAMEA9253159	ChIP-Seq	H3K27ac	1	C1210121	ERR10003184	ERX9544352	PRJEB55063	ERP139934	24a1b907eeee0738caecd385d68cdeb1	251f7066c179e2f4ba32b6d5d68734b7	135997098	SAMEA9253110	SAMEA9253156	ERR6663920	ERX6289066	PRJEB47408	ERP131681
AtlanticSalmon	BodyMap	Gonad	Immature	Female	SAMEA9253105	SAMEA9253161	ChIP-Seq	H3K27ac	1	C1210123	ERR10003186	ERX9544370	PRJEB55063	ERP139934	783b428f26cd2fea06258a3b03b393f2	c9e63956f83018e68b61c9127f5a222e	111379282	SAMEA9253110	SAMEA9253157	ERR6663921	ERX6289067	PRJEB47408	ERP131681
AtlanticSalmon	BodyMap	Liver	Immature	Female	SAMEA9253111	SAMEA9253163	ChIP-Seq	H3K27ac	1	C1210125	ERR10003187	ERX9544343	PRJEB55063	ERP139934	9f7d9a9a55a865ed9ebf39b80556ff3a	10fb2edbbdaa51faaaa2a82f14eab3e4	104975980	SAMEA9253111	SAMEA9253159	ERR10003184	ERX9544352	PRJEB55063	ERP139934
AtlanticSalmon	BodyMap	Muscle	Immature	Female	SAMEA9253111	SAMEA9253164	ChIP-Seq	H3K27ac	1	C1210126	ERR10003188	ERX9544361	PRJEB55063	ERP139934	de28a9a49b5cd8917c35a7c7b22f7ded	132fa73a1df5cf82d35136e91befac1d	115295906	SAMEA9253105	SAMEA9253161	ERR10003186	ERX9544370	PRJEB55063	ERP139934
AtlanticSalmon	BodyMap	Brain	Immature	Female	SAMEA9253111	SAMEA9253159	ChIP-Seq	H3K27me3	1	C1210131	ERR10003189	ERX9544353	PRJEB55063	ERP139934	721b1636506c0a815dce1244d065de81	0cceac370ea43c7da95c5a2e1d5aa5d6	114046372	SAMEA9253111	SAMEA9253163	ERR10003187	ERX9544343	PRJEB55063	ERP139934
AtlanticSalmon	BodyMap	Gonad	Immature	Female	SAMEA9253105	SAMEA9253161	ChIP-Seq	H3K27me3	1	C1210133	ERR10003191	ERX9544371	PRJEB55063	ERP139934	5bb13f1c357809f20181e9f794dca8a3	8309ec087d607bcf6737a8ae77fa0546	106374696	SAMEA9253111	SAMEA9253164	ERR10003188	ERX9544361	PRJEB55063	ERP139934
AtlanticSalmon	BodyMap	Liver	Immature	Female	SAMEA9253111	SAMEA9253163	ChIP-Seq	H3K27me3	1	C1210135	ERR10003192	ERX9544344	PRJEB55063	ERP139934	7feda0b4877c31d8da68caaf952466cf	a34e18a7f1f21df155ee5dc12e06027d	113297252	SAMEA9253111	SAMEA9253159	ERR10003189	ERX9544353	PRJEB55063	ERP139934
AtlanticSalmon	BodyMap	Muscle	Immature	Female	SAMEA9253111	SAMEA9253164	ChIP-Seq	H3K27me3	1	C1210136	ERR10003193	ERX9544362	PRJEB55063	ERP139934	4f0ba6258a988b2341b6750d2527fbdb	ccf8203e92d89d689165fda0e43f1844	91191066	SAMEA9253105	SAMEA9253161	ERR10003191	ERX9544371	PRJEB55063	ERP139934
AtlanticSalmon	BodyMap	Brain	Immature	Female	SAMEA9253111	SAMEA9253159	ChIP-Seq	H3K4me1	1	C1210141	ERR10003194	ERX9544350	PRJEB55063	ERP139934	7395e62656929842ed117fff61f35ae8	7bad9d1ac77b734a39ff1a397663aa3a	108398698	SAMEA9253111	SAMEA9253163	ERR10003192	ERX9544344	PRJEB55063	ERP139934
AtlanticSalmon	BodyMap	Gonad	Immature	Female	SAMEA9253111	SAMEA9253161	ChIP-Seq	H3K4me1	1	C1210143	ERR10003196	ERX9544368	PRJEB55063	ERP139934	71a1a54e7d6daabbdf7533978964a338	cd4a04452c2c4f3de22836b4e451e49d	119289088	SAMEA9253111	SAMEA9253164	ERR10003193	ERX9544362	PRJEB55063	ERP139934
AtlanticSalmon	BodyMap	Liver	Immature	Female	SAMEA9253111	SAMEA9253163	ChIP-Seq	H3K4me1	1	C1210145	ERR10003197	ERX9544341	PRJEB55063	ERP139934	da27f2f4d8460826bcb8f843c9c9463d	101b754ec52147a543b8df13ac68fd61	108482626	SAMEA9253111	SAMEA9253159	ERR10003194	ERX9544350	PRJEB55063	ERP139934
AtlanticSalmon	BodyMap	Muscle	Immature	Female	SAMEA9253111	SAMEA9253164	ChIP-Seq	H3K4me1	1	C1210146	ERR10003198	ERX9544359	PRJEB55063	ERP139934	f19810d2665d876a681db662293674cf	ecbcc07e12421f0b79851db6b91c5352	100453464	SAMEA9253111	SAMEA9253161	ERR10003196	ERX9544368	PRJEB55063	ERP139934
AtlanticSalmon	BodyMap	Brain	Immature	Female	SAMEA9253111	SAMEA9253159	ChIP-Seq	H3K4me3	1	C1210151	ERR10003199	ERX9544351	PRJEB55063	ERP139934	849895652e01560844a34dba067dc0b3	289bd59b20c67427e4e399d5a6786059	92625544	SAMEA9253111	SAMEA9253163	ERR10003197	ERX9544341	PRJEB55063	ERP139934
AtlanticSalmon	BodyMap	Gonad	Immature	Female	SAMEA9253111	SAMEA9253161	ChIP-Seq	H3K4me3	1	C1210153	ERR10003201	ERX9544369	PRJEB55063	ERP139934	ca0831cf2b2ae3fb559550f80e2e7b3a	325dfd0e43e5f7e5f9056f0f9ce4566f	102429172	SAMEA9253111	SAMEA9253164	ERR10003198	ERX9544359	PRJEB55063	ERP139934
AtlanticSalmon	BodyMap	Liver	Immature	Female	SAMEA9253111	SAMEA9253163	ChIP-Seq	H3K4me3	1	C1210155	ERR10003202	ERX9544342	PRJEB55063	ERP139934	68548be8a3fa1fb59261deae283dd794	a90a350963597eb97df9dbdaf2ee89d0	153891410	SAMEA9253111	SAMEA9253159	ERR10003199	ERX9544351	PRJEB55063	ERP139934
AtlanticSalmon	BodyMap	Muscle	Immature	Female	SAMEA9253111	SAMEA9253164	ChIP-Seq	H3K4me3	1	C1210156	ERR10003203	ERX9544360	PRJEB55063	ERP139934	9451a6f1eddfb0f731d3ac96f2020770	2111f5412636c23c3a3a69bee71d746c	108358366	SAMEA9253111	SAMEA9253161	ERR10003201	ERX9544369	PRJEB55063	ERP139934
AtlanticSalmon	BodyMap	Brain	Immature	Female	Input	SAMEA9253219	ChIP-Seq	Input	1	C1210161	ERR10003204	ERX9544358	PRJEB55063	ERP139934	56b7cc28c8884700245563e81b3616c2	901b6db7db7ef29be382720df0f6b8ee	263626168	SAMEA9253111	SAMEA9253163	ERR10003202	ERX9544342	PRJEB55063	ERP139934
AtlanticSalmon	BodyMap	Gill	Immature	Female	Input	SAMEA9253217	ChIP-Seq	Input	1	C1210162	ERR10003205	ERX9544340	PRJEB55063	ERP139934	b39d42ead1d0bdb0ca0dbbb3c0e67166	5a506a31faa59c48ed53aa501a3b899a	222736824	SAMEA9253111	SAMEA9253164	ERR10003203	ERX9544360	PRJEB55063	ERP139934	used for blacklist
AtlanticSalmon	BodyMap	Gonad	Immature	Female	Input	SAMEA9253221	ChIP-Seq	Input	1	C1210163	ERR10003206	ERX9544380	PRJEB55063	ERP139934	4246701b95f85c4b8cdcc8d0d9de2ddc	e2479c87a21a67cac0dcf50fc7badcf3	223833016	Input	SAMEA9253219	ERR10003204	ERX9544358	PRJEB55063	ERP139934
AtlanticSalmon	BodyMap	Liver	Immature	Female	Input	SAMEA9253218	ChIP-Seq	Input	1	C1210165	ERR10003207	ERX9544349	PRJEB55063	ERP139934	39832cda37b97f5cf299f3be4fc8473c	7308aac32b7407fe35c6eee38364a19a	231057440	Input	SAMEA9253217	ERR10003205	ERX9544340	PRJEB55063	ERP139934
AtlanticSalmon	BodyMap	Muscle	Immature	Female	Input	SAMEA9253220	ChIP-Seq	Input	1	C1210166	ERR10003208	ERX9544367	PRJEB55063	ERP139934	1b02b01508d108cae5648a90369c3a6d	68f7009939c56d9727f7d8edad31ca92	246930448	Input	SAMEA9253221	ERR10003206	ERX9544380	PRJEB55063	ERP139934
AtlanticSalmon	BodyMap	Brain	Immature	Female	SAMEA9253112	SAMEA9253166	ChIP-Seq	H3K27ac	2	C1210221	ERR10003209	ERX9544356	PRJEB55063	ERP139934	c9c053f7b0b50670ee542aac6887eb74	c9571e6e1693ada2a823d26c18c5abe2	111091416	Input	SAMEA9253218	ERR10003207	ERX9544349	PRJEB55063	ERP139934
AtlanticSalmon	BodyMap	Gonad	Immature	Female	SAMEA9253106	SAMEA9253169	ChIP-Seq	H3K27ac	2	C1210223	ERR10003211	ERX9544374	PRJEB55063	ERP139934	5591cf83c7cb0ffe899c2230da46e51e	11a14fdf2311ac5a857df474fd078e2c	123749640	Input	SAMEA9253220	ERR10003208	ERX9544367	PRJEB55063	ERP139934
AtlanticSalmon	BodyMap	Liver	Immature	Female	SAMEA9253112	SAMEA9253171	ChIP-Seq	H3K27ac	2	C1210225	ERR10003212	ERX9544347	PRJEB55063	ERP139934	023e8b9bb19ccb792dd6413160b45fef	71283e06c5dd3c06dcfee2ed64b3df4b	112804220	SAMEA9253112	SAMEA9253166	ERR10003209	ERX9544356	PRJEB55063	ERP139934
AtlanticSalmon	BodyMap	Muscle	Immature	Female	SAMEA9253112	SAMEA9253172	ChIP-Seq	H3K27ac	2	C1210226	ERR10003213	ERX9544365	PRJEB55063	ERP139934	11d317f0169dcf326d1f4e25ecb4287d	8acf283fca6c2c2987a2fe2fbc160022	89974988	SAMEA9253106	SAMEA9253169	ERR10003211	ERX9544374	PRJEB55063	ERP139934
AtlanticSalmon	BodyMap	Brain	Immature	Female	SAMEA9253112	SAMEA9253166	ChIP-Seq	H3K27me3	2	C1210231	ERR10003214	ERX9544357	PRJEB55063	ERP139934	dd145939a1489fbbf8c787cb68ffdb21	6fa79119da48bba90393d2c349aeb516	103082972	SAMEA9253112	SAMEA9253171	ERR10003212	ERX9544347	PRJEB55063	ERP139934
AtlanticSalmon	BodyMap	Gonad	Immature	Female	SAMEA9253106	SAMEA9253169	ChIP-Seq	H3K27me3	2	C1210233	ERR10003216	ERX9544375	PRJEB55063	ERP139934	01565a4fa16dbfaf3b08447341c818de	96e1c6e570b2964de0ca83d1f83e098c	126239522	SAMEA9253112	SAMEA9253172	ERR10003213	ERX9544365	PRJEB55063	ERP139934
AtlanticSalmon	BodyMap	Liver	Immature	Female	SAMEA9253112	SAMEA9253171	ChIP-Seq	H3K27me3	2	C1210235	ERR10003217	ERX9544348	PRJEB55063	ERP139934	47a12a20c2dbbcd082e8c8eff31a7492	0486f41112df5571c20912448e359dcc	131321850	SAMEA9253112	SAMEA9253166	ERR10003214	ERX9544357	PRJEB55063	ERP139934
AtlanticSalmon	BodyMap	Muscle	Immature	Female	SAMEA9253112	SAMEA9253172	ChIP-Seq	H3K27me3	2	C1210236	ERR10003218	ERX9544366	PRJEB55063	ERP139934	96dfb8e292a68c49d6229d3f462d349c	38bfa85a77764a284ce4ab42dbba6119	120121596	SAMEA9253106	SAMEA9253169	ERR10003216	ERX9544375	PRJEB55063	ERP139934
AtlanticSalmon	BodyMap	Brain	Immature	Female	SAMEA9253112	SAMEA9253166	ChIP-Seq	H3K4me1	2	C1210241	ERR10003219	ERX9544354	PRJEB55063	ERP139934	4576cb3569989dc852ac61c7fbfe6ed5	f9598c9e85a7e978e5697de0da23eefc	96345016	SAMEA9253112	SAMEA9253171	ERR10003217	ERX9544348	PRJEB55063	ERP139934
AtlanticSalmon	BodyMap	Gonad	Immature	Female	SAMEA9253112	SAMEA9253169	ChIP-Seq	H3K4me1	2	C1210243	ERR10003221	ERX9544372	PRJEB55063	ERP139934	98d3020ad4eab188d63f1631361f585a	31a483aefa4e112cfc7bc898f34a4e70	113647076	SAMEA9253112	SAMEA9253172	ERR10003218	ERX9544366	PRJEB55063	ERP139934
AtlanticSalmon	BodyMap	Liver	Immature	Female	SAMEA9253112	SAMEA9253171	ChIP-Seq	H3K4me1	2	C1210245	ERR10003222	ERX9544345	PRJEB55063	ERP139934	678642255b5d00fe87d85addd1417513	d21b5b2ece42883a863e942cf18080f0	115825956	SAMEA9253112	SAMEA9253166	ERR10003219	ERX9544354	PRJEB55063	ERP139934
AtlanticSalmon	BodyMap	Muscle	Immature	Female	SAMEA9253112	SAMEA9253172	ChIP-Seq	H3K4me1	2	C1210246	ERR10003223	ERX9544363	PRJEB55063	ERP139934	b98cce67e18e812a16f1eb8ae0c4fcaa	140aabcc86e01121df432afefca66fdc	112566730	SAMEA9253112	SAMEA9253169	ERR10003221	ERX9544372	PRJEB55063	ERP139934
AtlanticSalmon	BodyMap	Brain	Immature	Female	SAMEA9253112	SAMEA9253166	ChIP-Seq	H3K4me3	2	C1210251	ERR10003224	ERX9544355	PRJEB55063	ERP139934	c63489195c38ba48c59f205f2b4d2aa0	e24ec11230fb333d55a6db453d7e40d9	103654052	SAMEA9253112	SAMEA9253171	ERR10003222	ERX9544345	PRJEB55063	ERP139934
AtlanticSalmon	BodyMap	Gonad	Immature	Female	SAMEA9253112	SAMEA9253169	ChIP-Seq	H3K4me3	2	C1210253	ERR10003226	ERX9544373	PRJEB55063	ERP139934	a41b13d3d685efbca9d74c05f4d9277e	1fd049aed79ce380610e51092a720f9c	131024646	SAMEA9253112	SAMEA9253172	ERR10003223	ERX9544363	PRJEB55063	ERP139934
AtlanticSalmon	BodyMap	Liver	Immature	Female	SAMEA9253112	SAMEA9253171	ChIP-Seq	H3K4me3	2	C1210255	ERR10003227	ERX9544346	PRJEB55063	ERP139934	b1c12718f17d961e26698db4b268e59f	038ed1a9f88428b0537db5e8bdc21df1	107387620	SAMEA9253112	SAMEA9253166	ERR10003224	ERX9544355	PRJEB55063	ERP139934
AtlanticSalmon	BodyMap	Muscle	Immature	Female	SAMEA9253112	SAMEA9253172	ChIP-Seq	H3K4me3	2	C1210256	ERR10003228	ERX9544364	PRJEB55063	ERP139934	4f971f04ee8095edfc602990f0f50076	614fe6321f6094d1ab93efed54b73750	120676832	SAMEA9253112	SAMEA9253169	ERR10003226	ERX9544373	PRJEB55063	ERP139934
AtlanticSalmon	BodyMap	Gonad	Immature	Female	SAMEA9253107	SAMEA9253176	ChIP-Seq	H3K27ac	3	C1210323	ERR10003229	ERX9544378	PRJEB55064	ERP139935	b027c083cd305a32492f1c4f75e0d967	84623a77a7a72729a83eddef5a92de79	102321368	SAMEA9253112	SAMEA9253171	ERR10003227	ERX9544346	PRJEB55063	ERP139934
AtlanticSalmon	BodyMap	Gonad	Immature	Female	SAMEA9253107	SAMEA9253176	ChIP-Seq	H3K27me3	3	C1210333	ERR10003230	ERX9544379	PRJEB55063	ERP139934	f43ec4cb245d4b193b8669a5f9f4b656	e7e88781212dce432d2c74ab5ff6b3c1	108862158	SAMEA9253112	SAMEA9253172	ERR10003228	ERX9544364	PRJEB55063	ERP139934
AtlanticSalmon	BodyMap	Gonad	Immature	Female	SAMEA9253113	SAMEA9253176	ChIP-Seq	H3K4me1	3	C1210343	ERR10003231	ERX9544376	PRJEB55063	ERP139934	04a81ca78538002c262ff275d66f2c3f	1b3a41c38c8969406f2f48bce82a34eb	127738280	SAMEA9253107	SAMEA9253176	ERR10003229	ERX9544378	PRJEB55064	ERP139935
AtlanticSalmon	BodyMap	Gonad	Immature	Female	SAMEA9253113	SAMEA9253176	ChIP-Seq	H3K4me3	3	C1210353	ERR10003232	ERX9544377	PRJEB55063	ERP139934	541f21279a70736f438bbb9982947947	bfe59f8b1e3b3d19dfc67fbef6c19b07	106135636	SAMEA9253107	SAMEA9253176	ERR10003230	ERX9544379	PRJEB55063	ERP139934
AtlanticSalmon	BodyMap	Brain	Immature	Male	SAMEA9253114	SAMEA9253181	ChIP-Seq	H3K27ac	1	C1220121	ERR10003233	ERX9544254	PRJEB55063	ERP139934	5bad3d3ee9e6d7b2a463ca77b456dda4	c12e62601f8930c1075796a1aa6ac17e	122204876	SAMEA9253113	SAMEA9253176	ERR10003231	ERX9544376	PRJEB55063	ERP139934
AtlanticSalmon	BodyMap	Gonad	Immature	Male	SAMEA9253108	SAMEA9253183	ChIP-Seq	H3K27ac	1	C1220123	ERR10003235	ERX9544272	PRJEB55063	ERP139934	054b42b1e06c91470fd7277f0bdda979	36f5523f0cc0a598196028cd6c857150	125308182	SAMEA9253113	SAMEA9253176	ERR10003232	ERX9544377	PRJEB55063	ERP139934
AtlanticSalmon	BodyMap	Liver	Immature	Male	SAMEA9253114	SAMEA9253185	ChIP-Seq	H3K27ac	1	C1220125	ERR10003236	ERX9544245	PRJEB55063	ERP139934	f6cc5628021704f54391e24b0cd648b1	704f00266f95d8ae8532457825620b9d	107574448	SAMEA9253114	SAMEA9253181	ERR10003233	ERX9544254	PRJEB55063	ERP139934
AtlanticSalmon	BodyMap	Muscle	Immature	Male	SAMEA9253114	SAMEA9253186	ChIP-Seq	H3K27ac	1	C1220126	ERR10003237	ERX9544263	PRJEB55063	ERP139934	ae6f014f344857bede1e78c92acd056f	58e84d6c983ba8253d2d87d65d1122fa	146377436	SAMEA9253108	SAMEA9253183	ERR10003235	ERX9544272	PRJEB55063	ERP139934
AtlanticSalmon	BodyMap	Brain	Immature	Male	SAMEA9253114	SAMEA9253181	ChIP-Seq	H3K27me3	1	C1220131	ERR10003238	ERX9544255	PRJEB55063	ERP139934	6c73862b9d240e0f7361159f4b8b06d9	673e940c0c8d80d5cc428318d405c963	92653362	SAMEA9253114	SAMEA9253185	ERR10003236	ERX9544245	PRJEB55063	ERP139934
AtlanticSalmon	BodyMap	Gonad	Immature	Male	SAMEA9253108	SAMEA9253183	ChIP-Seq	H3K27me3	1	C1220133	ERR10003240	ERX9544273	PRJEB55063	ERP139934	e08a60bf7fe9123880015b987ae29c09	2b3240c12121b2fb038d4bfddb622a68	106075850	SAMEA9253114	SAMEA9253186	ERR10003237	ERX9544263	PRJEB55063	ERP139934
AtlanticSalmon	BodyMap	Liver	Immature	Male	SAMEA9253114	SAMEA9253185	ChIP-Seq	H3K27me3	1	C1220135	ERR10003241	ERX9544246	PRJEB55063	ERP139934	0edae3408780bb37e095be62ec5cc376	28f40c248f7490e3dcc4ad382b970bef	114172580	SAMEA9253114	SAMEA9253181	ERR10003238	ERX9544255	PRJEB55063	ERP139934
AtlanticSalmon	BodyMap	Muscle	Immature	Male	SAMEA9253114	SAMEA9253186	ChIP-Seq	H3K27me3	1	C1220136	ERR10003242	ERX9544264	PRJEB55063	ERP139934	0c3b46f6d22cb47eb732f69b79981003	11ad84728f16482eef6b3597e6395e2d	101685158	SAMEA9253108	SAMEA9253183	ERR10003240	ERX9544273	PRJEB55063	ERP139934
AtlanticSalmon	BodyMap	Brain	Immature	Male	SAMEA9253114	SAMEA9253181	ChIP-Seq	H3K4me1	1	C1220141	ERR10003243	ERX9544252	PRJEB55063	ERP139934	b8ef093341c43f5ed34a28b285c39a90	8f3918e52a3565dd65ac6046457316a9	108463104	SAMEA9253114	SAMEA9253185	ERR10003241	ERX9544246	PRJEB55063	ERP139934
AtlanticSalmon	BodyMap	Gonad	Immature	Male	SAMEA9253114	SAMEA9253183	ChIP-Seq	H3K4me1	1	C1220143	ERR10003245	ERX9544270	PRJEB55063	ERP139934	c86730bf68909aeae614a333eebfce5a	0bcc74f0ce6c021f5fdbcd4c4f34828e	109274806	SAMEA9253114	SAMEA9253186	ERR10003242	ERX9544264	PRJEB55063	ERP139934
AtlanticSalmon	BodyMap	Liver	Immature	Male	SAMEA9253114	SAMEA9253185	ChIP-Seq	H3K4me1	1	C1220145	ERR10003246	ERX9544243	PRJEB55063	ERP139934	91c8bcecf65fd3624d5de7a6abad9234	623101741124f3062394ba08bb21415f	118427144	SAMEA9253114	SAMEA9253181	ERR10003243	ERX9544252	PRJEB55063	ERP139934
AtlanticSalmon	BodyMap	Muscle	Immature	Male	SAMEA9253114	SAMEA9253186	ChIP-Seq	H3K4me1	1	C1220146	ERR10003247	ERX9544261	PRJEB55063	ERP139934	989f611675b7413ab43419679c17cba6	ec304b1aa55c1242870c2f159ba26a53	134009440	SAMEA9253114	SAMEA9253183	ERR10003245	ERX9544270	PRJEB55063	ERP139934
AtlanticSalmon	BodyMap	Brain	Immature	Male	SAMEA9253114	SAMEA9253181	ChIP-Seq	H3K4me3	1	C1220151	ERR10003248	ERX9544253	PRJEB55063	ERP139934	949943a430f0a1b3b960620b4f3dafce	101eaa69d64d0e2a52a1bf3ca49a129c	103192268	SAMEA9253114	SAMEA9253185	ERR10003246	ERX9544243	PRJEB55063	ERP139934
AtlanticSalmon	BodyMap	Gonad	Immature	Male	SAMEA9253114	SAMEA9253183	ChIP-Seq	H3K4me3	1	C1220153	ERR10003250	ERX9544271	PRJEB55063	ERP139934	490435598383eeb8cc39b438a0e12d44	51c17ca872054ee7a1257bf2a3150475	101299254	SAMEA9253114	SAMEA9253186	ERR10003247	ERX9544261	PRJEB55063	ERP139934
AtlanticSalmon	BodyMap	Liver	Immature	Male	SAMEA9253114	SAMEA9253185	ChIP-Seq	H3K4me3	1	C1220155	ERR10003251	ERX9544244	PRJEB55063	ERP139934	51f906f6f9a84754bf0721517fea7f7f	4fc7cdfc35838bff7f301cd6bd012f39	113254912	SAMEA9253114	SAMEA9253181	ERR10003248	ERX9544253	PRJEB55063	ERP139934
AtlanticSalmon	BodyMap	Muscle	Immature	Male	SAMEA9253114	SAMEA9253186	ChIP-Seq	H3K4me3	1	C1220156	ERR10003252	ERX9544262	PRJEB55063	ERP139934	53b4cb98c575f7d0a5527740d2ffaafb	244ee1f2db7d3b3d89b7d40cefc3f8a2	119012806	SAMEA9253114	SAMEA9253183	ERR10003250	ERX9544271	PRJEB55063	ERP139934
AtlanticSalmon	BodyMap	Brain	Immature	Male	Input	SAMEA9253209	ChIP-Seq	Input	1	C1220161	ERR10003253	ERX9544260	PRJEB55063	ERP139934	99ceb9e950f50b193458a89a544066c1	185d01cac47ff59fe571cccda199ce9f	205730696		SAMEA9253185	ERR10003251	ERX9544244	PRJEB55063	ERP139934
AtlanticSalmon	BodyMap	Gill	Immature	Male	Input	SAMEA9253207	ChIP-Seq	Input	1	C1220162	ERR10003254	ERX9544242	PRJEB55063	ERP139934	3a0cf2fd8e1de0a56c265bc34be87815	5a44b8c66cdc419d2ed2cea870456905	213345334		SAMEA9253186	ERR10003252	ERX9544262	PRJEB55063	ERP139934	used for blacklist
AtlanticSalmon	BodyMap	Gonad	Immature	Male	Input	SAMEA9253211	ChIP-Seq	Input	1	C1220163	ERR10003255	ERX9544282	PRJEB55063	ERP139934	f38db8b7dcd5c5247979ef2f3e5386d7	3d1fe2b800b6241c2bcbd66049da9264	195625056		SAMEA9253209	ERR10003253	ERX9544260	PRJEB55063	ERP139934
AtlanticSalmon	BodyMap	Liver	Immature	Male	Input	SAMEA9253208	ChIP-Seq	Input	1	C1220165	ERR10003256	ERX9544251	PRJEB55063	ERP139934	8696ed4eeeee72681428a3ac6904cea2	9f8a6f3fd93241de7a8fbe3b417614c3	222137444		SAMEA9253207	ERR10003254	ERX9544242	PRJEB55063	ERP139934
AtlanticSalmon	BodyMap	Muscle	Immature	Male	Input	SAMEA9253210	ChIP-Seq	Input	1	C1220166	ERR10003257	ERX9544269	PRJEB55063	ERP139934	d86cde3dba1d9f0ef1a1fb90aa25ddd8	a8fa1695e5ed9f3dbd33ebe91ea75de9	226099750		SAMEA9253211	ERR10003255	ERX9544282	PRJEB55063	ERP139934
AtlanticSalmon	BodyMap	Gonad	Immature	Male	SAMEA9253109	SAMEA9253190	ChIP-Seq	H3K27ac	2	C1220223	ERR10003258	ERX9544280	PRJEB55063	ERP139934	e5c1a7bfff1d8ad5c4129e0b5456615e	c63e2ac1e35cba544dec5ab205a923b7	142828860	Input	SAMEA9253208	ERR10003256	ERX9544251	PRJEB55063	ERP139934
AtlanticSalmon	BodyMap	Gonad	Immature	Male	SAMEA9253109	SAMEA9253190	ChIP-Seq	H3K27me3	2	C1220233	ERR10003259	ERX9544281	PRJEB55063	ERP139934	c3e9c6aa8b7946037b9eed0034b7bfe8	2c84ea1c4b9b524df22f89b1c21879b4	101006018	Input	SAMEA9253210	ERR10003257	ERX9544269	PRJEB55063	ERP139934
AtlanticSalmon	BodyMap	Gonad	Immature	Male	SAMEA9253115	SAMEA9253190	ChIP-Seq	H3K4me1	2	C1220243	ERR10003260	ERX9544278	PRJEB55063	ERP139934	b0c76df2cff34a6a70ea19078182728a	050a4c2444da889619e7f1d39f144739	104694834	SAMEA9253109	SAMEA9253190	ERR10003258	ERX9544280	PRJEB55063	ERP139934
AtlanticSalmon	BodyMap	Gonad	Immature	Male	SAMEA9253115	SAMEA9253190	ChIP-Seq	H3K4me3	2	C1220253	ERR10003261	ERX9544279	PRJEB55063	ERP139934	e38604c17a5225c38d59c2bfbdc8fe25	c48003e8f8433eb44fb4eb2445478313	101605146	SAMEA9253109	SAMEA9253190	ERR10003259	ERX9544281	PRJEB55063	ERP139934
AtlanticSalmon	BodyMap	Brain	Immature	Male	SAMEA9253116	SAMEA9253195	ChIP-Seq	H3K27ac	2	C1220321	ERR10003262	ERX9544258	PRJEB55063	ERP139934	43fb8a3f4e8491826b62c58d6d55e724	570c92a07510256d2ec3fd79b01bd8e4	103739314	SAMEA9253115	SAMEA9253190	ERR10003260	ERX9544278	PRJEB55063	ERP139934
AtlanticSalmon	BodyMap	Gonad	Immature	Male	SAMEA9253110	SAMEA9253197	ChIP-Seq	H3K27ac	3	C1220323	ERR10003264	ERX9544276	PRJEB55063	ERP139934	4dfa0269469185ba9e1def133b5e99ef	6372547dc4eb6ea2a4f82561cd377b7b	104442382	SAMEA9253115	SAMEA9253190	ERR10003261	ERX9544279	PRJEB55063	ERP139934
AtlanticSalmon	BodyMap	Liver	Immature	Male	SAMEA9253116	SAMEA9253199	ChIP-Seq	H3K27ac	2	C1220325	ERR10003265	ERX9544249	PRJEB55063	ERP139934	d7aa05b2933bf24f30d0e5150ef4c18d	7804292bc07b9455bad343ca737f1031	120875270	SAMEA9253116	SAMEA9253195	ERR10003262	ERX9544258	PRJEB55063	ERP139934
AtlanticSalmon	BodyMap	Muscle	Immature	Male	SAMEA9253116	SAMEA9253200	ChIP-Seq	H3K27ac	2	C1220326	ERR10003266	ERX9544267	PRJEB55063	ERP139934	77f78ea0517ca846edcada84efb14117	1297e1f6e3419eae962e23fa8443a28d	90888830	SAMEA9253110	SAMEA9253197	ERR10003264	ERX9544276	PRJEB55063	ERP139934
AtlanticSalmon	BodyMap	Brain	Immature	Male	SAMEA9253116	SAMEA9253195	ChIP-Seq	H3K27me3	2	C1220331	ERR10003267	ERX9544259	PRJEB55063	ERP139934	6e4082b298cfe6e5aa125d862a3f4fe0	4336acf301d841b6bb6b89730e33771f	93253130	SAMEA9253116	SAMEA9253199	ERR10003265	ERX9544249	PRJEB55063	ERP139934
AtlanticSalmon	BodyMap	Gonad	Immature	Male	SAMEA9253110	SAMEA9253197	ChIP-Seq	H3K27me3	3	C1220333	ERR10003269	ERX9544277	PRJEB55063	ERP139934	a6112879e11a882ba8e63284082dffa6	1dd62794263830efad56aec6b1a07ff6	107530456	SAMEA9253116	SAMEA9253200	ERR10003266	ERX9544267	PRJEB55063	ERP139934
AtlanticSalmon	BodyMap	Liver	Immature	Male	SAMEA9253116	SAMEA9253199	ChIP-Seq	H3K27me3	2	C1220335	ERR10003270	ERX9544250	PRJEB55063	ERP139934	cafa98be618af9a5b88ce9ec003457cc	da843007e335eb10baea38b0744f8a76	119837444	SAMEA9253116	SAMEA9253195	ERR10003267	ERX9544259	PRJEB55063	ERP139934
AtlanticSalmon	BodyMap	Muscle	Immature	Male	SAMEA9253116	SAMEA9253200	ChIP-Seq	H3K27me3	2	C1220336	ERR10003271	ERX9544268	PRJEB55063	ERP139934	fbc96679bf2da75753fff9d5e9abd0a9	b96125ecd185dd553f53a1e18d00baac	107488282	SAMEA9253110	SAMEA9253197	ERR10003269	ERX9544277	PRJEB55063	ERP139934
AtlanticSalmon	BodyMap	Brain	Immature	Male	SAMEA9253116	SAMEA9253195	ChIP-Seq	H3K4me1	2	C1220341	ERR10003272	ERX9544256	PRJEB55063	ERP139934	cae7c7d5fdb5a976cddbd967890f61de	4207ce97b179fd1c760bf112d29e23fc	116433600	SAMEA9253116	SAMEA9253199	ERR10003270	ERX9544250	PRJEB55063	ERP139934
AtlanticSalmon	BodyMap	Gonad	Immature	Male	SAMEA9253116	SAMEA9253197	ChIP-Seq	H3K4me1	3	C1220343	ERR10003274	ERX9544274	PRJEB55063	ERP139934	0dfb660a39bfbf5542763e0bf354720c	904a32a37abf17d2511d6a3ee6b63fd5	129832330	SAMEA9253116	SAMEA9253200	ERR10003271	ERX9544268	PRJEB55063	ERP139934
AtlanticSalmon	BodyMap	Liver	Immature	Male	SAMEA9253116	SAMEA9253199	ChIP-Seq	H3K4me1	2	C1220345	ERR10003275	ERX9544247	PRJEB55063	ERP139934	cccb0750282003749917408448270a8d	55e41f1f0d4297ce3c5d7f6a4a805399	110483300	SAMEA9253116	SAMEA9253195	ERR10003272	ERX9544256	PRJEB55063	ERP139934
AtlanticSalmon	BodyMap	Muscle	Immature	Male	SAMEA9253116	SAMEA9253200	ChIP-Seq	H3K4me1	2	C1220346	ERR10003276	ERX9544265	PRJEB55063	ERP139934	8a75db43a0005070976dbb0fedf81747	cca4f7027e67c3c6a2df59577c9b3cf5	105782468	SAMEA9253116	SAMEA9253197	ERR10003274	ERX9544274	PRJEB55063	ERP139934
AtlanticSalmon	BodyMap	Brain	Immature	Male	SAMEA9253116	SAMEA9253195	ChIP-Seq	H3K4me3	2	C1220351	ERR10003277	ERX9544257	PRJEB55063	ERP139934	66e772ab02ec684b489faec74f55caa4	7166ab5eb3d8d265014cc0aefd00462b	104364484	SAMEA9253116	SAMEA9253199	ERR10003275	ERX9544247	PRJEB55063	ERP139934
AtlanticSalmon	BodyMap	Gonad	Immature	Male	SAMEA9253116	SAMEA9253197	ChIP-Seq	H3K4me3	3	C1220353	ERR10003279	ERX9544275	PRJEB55063	ERP139934	75fe3fb80ca9663d4f9dd7e47d8481bc	05c26078db84ae9d97e41b3a204dc64d	106693718	SAMEA9253116	SAMEA9253200	ERR10003276	ERX9544265	PRJEB55063	ERP139934
AtlanticSalmon	BodyMap	Liver	Immature	Male	SAMEA9253116	SAMEA9253199	ChIP-Seq	H3K4me3	2	C1220355	ERR10003280	ERX9544248	PRJEB55063	ERP139934	92aac2d57ae941d74c5932f1d3aca2c3	69fec3a6a9cfba9912af75a449f8eef6	110143640	SAMEA9253116	SAMEA9253195	ERR10003277	ERX9544257	PRJEB55063	ERP139934
AtlanticSalmon	BodyMap	Muscle	Immature	Male	SAMEA9253116	SAMEA9253200	ChIP-Seq	H3K4me3	2	C1220356	ERR10003281	ERX9544266	PRJEB55063	ERP139934	203f3c4795e6cb31b77ef528b757c1eb	265ffe472a6219b9c7e53f0522dcc1ab	110184494	SAMEA9253116	SAMEA9253197	ERR10003279	ERX9544275	PRJEB55063	ERP139934
AtlanticSalmon	BodyMap	Gonad	Mature	Female	SAMEA9253111	SAMEA9253119	ChIP-Seq	H3K27ac	1	C1230423	ERR10003282	ERX9544329	PRJEB55063	ERP139934	4e297746fcf74aab4dcb10ac04a1f4d0	4dc61a654e7f87cab30a12f62b70900c	140982598	SAMEA9253116	SAMEA9253199	ERR10003280	ERX9544248	PRJEB55063	ERP139934
AtlanticSalmon	BodyMap	Gonad	Mature	Female	SAMEA9253111	SAMEA9253119	ChIP-Seq	H3K27me3	1	C1230433	ERR10003283	ERX9544330	PRJEB55063	ERP139934	72521e91c334695dba194709ef83bc4c	f18ce93bdbff5ae835e376d0801aaf02	117348306	SAMEA9253116	SAMEA9253200	ERR10003281	ERX9544266	PRJEB55063	ERP139934
AtlanticSalmon	BodyMap	Gonad	Mature	Female	SAMEA9253105	SAMEA9253119	ChIP-Seq	H3K4me1	1	C1230443	ERR10003284	ERX9544327	PRJEB55063	ERP139934	9a6c3de853092e4e77a645e749d92d50	f07918cc535cc994812adb785fab570a	105431950	SAMEA9253111	SAMEA9253119	ERR10003282	ERX9544329	PRJEB55063	ERP139934
AtlanticSalmon	BodyMap	Gonad	Mature	Female	SAMEA9253105	SAMEA9253119	ChIP-Seq	H3K4me3	1	C1230453	ERR10003285	ERX9544328	PRJEB55063	ERP139934	7040a2868b643d37e28dccbb6a68fc53	828bca35fa3623762765aecddb3d179d	128926552	SAMEA9253111	SAMEA9253119	ERR10003283	ERX9544330	PRJEB55063	ERP139934
AtlanticSalmon	BodyMap	Brain	Mature	Female	SAMEA9253106	SAMEA9253124	ChIP-Seq	H3K27ac	1	C1230521	ERR10003286	ERX9544303	PRJEB55063	ERP139934	02b33fb7de27b41571d95b362cdc31f8	7e2da264954a92538efb044044242ae2	92312168	SAMEA9253105	SAMEA9253119	ERR10003284	ERX9544327	PRJEB55063	ERP139934
AtlanticSalmon	BodyMap	Gonad	Mature	Female	SAMEA9253112	SAMEA9253126	ChIP-Seq	H3K27ac	2	C1230523	ERR10003288	ERX9544321	PRJEB55063	ERP139934	0ceb1bdaacc9d02aec3ff1cfe7470f94	e00e69d5aacee7343eaec22696fcc951	92890332	SAMEA9253105	SAMEA9253119	ERR10003285	ERX9544328	PRJEB55063	ERP139934
AtlanticSalmon	BodyMap	Liver	Mature	Female	SAMEA9253106	SAMEA9253128	ChIP-Seq	H3K27ac	1	C1230525	ERR10003289	ERX9544294	PRJEB55063	ERP139934	b0628e81008b08775e54d6e92be00bf5	14fb2199ee3d7beaa06b150af8c15422	140272600	SAMEA9253106	SAMEA9253124	ERR10003286	ERX9544303	PRJEB55063	ERP139934
AtlanticSalmon	BodyMap	Muscle	Mature	Female	SAMEA9253106	SAMEA9253129	ChIP-Seq	H3K27ac	1	C1230526	ERR10003290	ERX9544312	PRJEB55063	ERP139934	3d6799a4ec5379495a94a0a7055216aa	3e7535c6882501539974035e83212650	124696214	SAMEA9253112	SAMEA9253126	ERR10003288	ERX9544321	PRJEB55063	ERP139934
AtlanticSalmon	BodyMap	Brain	Mature	Female	SAMEA9253106	SAMEA9253124	ChIP-Seq	H3K27me3	1	C1230531	ERR10003291	ERX9544304	PRJEB55063	ERP139934	eee70b9e57fb5f877e2a4c89d2d20b5f	dd68c6d21d34febd2311adde84dfe5b9	90484314	SAMEA9253106	SAMEA9253128	ERR10003289	ERX9544294	PRJEB55063	ERP139934
AtlanticSalmon	BodyMap	Gonad	Mature	Female	SAMEA9253112	SAMEA9253126	ChIP-Seq	H3K27me3	2	C1230533	ERR10003293	ERX9544322	PRJEB55063	ERP139934	78f85e50ccffee839c896dbe950c8dc0	17a92935e4c0c03f1596865d7db1c9f1	134150852	SAMEA9253106	SAMEA9253129	ERR10003290	ERX9544312	PRJEB55063	ERP139934
AtlanticSalmon	BodyMap	Liver	Mature	Female	SAMEA9253106	SAMEA9253128	ChIP-Seq	H3K27me3	1	C1230535	ERR10003294	ERX9544295	PRJEB55063	ERP139934	39c022972605d6f155fbaa0d52db5c0a	2387212a39d209e77d1ab0650c9a072f	103856678	SAMEA9253106	SAMEA9253124	ERR10003291	ERX9544304	PRJEB55063	ERP139934
AtlanticSalmon	BodyMap	Muscle	Mature	Female	SAMEA9253106	SAMEA9253129	ChIP-Seq	H3K27me3	1	C1230536	ERR10003295	ERX9544313	PRJEB55063	ERP139934	954262ad64cfdc89e9a6741f40c61916	9f7c6c4457330466e806e90a9ccc0d78	98211674	SAMEA9253112	SAMEA9253126	ERR10003293	ERX9544322	PRJEB55063	ERP139934
AtlanticSalmon	BodyMap	Brain	Mature	Female	SAMEA9253106	SAMEA9253124	ChIP-Seq	H3K4me1	1	C1230541	ERR10003296	ERX9544301	PRJEB55063	ERP139934	24a57f8311568500f8156b46e8823ec9	d99edb0bd3268a06301b55844ec16251	101851058	SAMEA9253106	SAMEA9253128	ERR10003294	ERX9544295	PRJEB55063	ERP139934
AtlanticSalmon	BodyMap	Gonad	Mature	Female	SAMEA9253106	SAMEA9253126	ChIP-Seq	H3K4me1	2	C1230543	ERR10003298	ERX9544319	PRJEB55063	ERP139934	79bdff112784611922906ed0c1727359	c7d49e42d4e43ea2d25b1f5df2bf15c4	125448926	SAMEA9253106	SAMEA9253129	ERR10003295	ERX9544313	PRJEB55063	ERP139934
AtlanticSalmon	BodyMap	Liver	Mature	Female	SAMEA9253106	SAMEA9253128	ChIP-Seq	H3K4me1	1	C1230545	ERR10003299	ERX9544292	PRJEB55063	ERP139934	c0194c2d2bf511136f999c98d1d38823	66eabe15dfc473b5cc9773cbc0d950b9	126160962	SAMEA9253106	SAMEA9253124	ERR10003296	ERX9544301	PRJEB55063	ERP139934
AtlanticSalmon	BodyMap	Muscle	Mature	Female	SAMEA9253106	SAMEA9253129	ChIP-Seq	H3K4me1	1	C1230546	ERR10003300	ERX9544310	PRJEB55063	ERP139934	5c8ce7a8d6e7bfbbfd6a25e9c79a199c	8fe9a6818854e60b685bf06ce7a1b2fa	134486816	SAMEA9253106	SAMEA9253126	ERR10003298	ERX9544319	PRJEB55063	ERP139934
AtlanticSalmon	BodyMap	Brain	Mature	Female	SAMEA9253106	SAMEA9253124	ChIP-Seq	H3K4me3	1	C1230551	ERR10003301	ERX9544302	PRJEB55063	ERP139934	e5de87eb28940df482eec5755c48003c	ab71128d3916adcb1e026eaa87f30006	126490516	SAMEA9253106	SAMEA9253128	ERR10003299	ERX9544292	PRJEB55063	ERP139934
AtlanticSalmon	BodyMap	Gonad	Mature	Female	SAMEA9253106	SAMEA9253126	ChIP-Seq	H3K4me3	2	C1230553	ERR10003303	ERX9544320	PRJEB55063	ERP139934	d12f2d19428e8ca997b9c3fdee2c411a	9acc75bfa573835b821765b22d1c4448	119828318	SAMEA9253106	SAMEA9253129	ERR10003300	ERX9544310	PRJEB55063	ERP139934
AtlanticSalmon	BodyMap	Liver	Mature	Female	SAMEA9253106	SAMEA9253128	ChIP-Seq	H3K4me3	1	C1230555	ERR10003304	ERX9544293	PRJEB55063	ERP139934	7e83fc67211dff9fb37c18a38f000adc	80110921b95e894f6a1eadf25f8f5f82	111321706	SAMEA9253106	SAMEA9253124	ERR10003301	ERX9544302	PRJEB55063	ERP139934
AtlanticSalmon	BodyMap	Muscle	Mature	Female	SAMEA9253106	SAMEA9253129	ChIP-Seq	H3K4me3	1	C1230556	ERR10003305	ERX9544311	PRJEB55063	ERP139934	8d7b25689ce93dc15bf0fa7cd918f4c7	23941142e09b9430e4b8643379503dd6	112346904	SAMEA9253106	SAMEA9253126	ERR10003303	ERX9544320	PRJEB55063	ERP139934
AtlanticSalmon	BodyMap	Brain	Mature	Female		SAMEA9253214	ChIP-Seq	Input	1	C1230561	ERR10003306	ERX9544309	PRJEB55063	ERP139934	8e4cc3e31a1ca98c07450b784e1de34f	3a5f3829546a798e5a51c87a051de3c6	188312438		SAMEA9253128	ERR10003304	ERX9544293	PRJEB55063	ERP139934
AtlanticSalmon	BodyMap	Gill	Mature	Female		SAMEA9253212	ChIP-Seq	Input	1	C1230562	ERR10003307	ERX9544291	PRJEB55063	ERP139934	96202f258472d5f9cfaccddbbf652a7d	f6a4c78681492dcb8c93da5ffed9afff	200090734		SAMEA9253129	ERR10003305	ERX9544311	PRJEB55063	ERP139934	used for blacklist
AtlanticSalmon	BodyMap	Gonad	Mature	Female		SAMEA9253216	ChIP-Seq	Input	1	C1230563	ERR10003308	ERX9544331	PRJEB55063	ERP139934	7d2aaaac3859d92109b768bb6a204b99	8e666aee72191ae96cab48d2a6d9f78a	228470786		SAMEA9253214	ERR10003306	ERX9544309	PRJEB55063	ERP139934
AtlanticSalmon	BodyMap	Liver	Mature	Female		SAMEA9253213	ChIP-Seq	Input	1	C1230565	ERR10003309	ERX9544300	PRJEB55063	ERP139934	b34295ca06ebcaeef9f927c622236f4f	1f7ba18cd6806558f7a626439b7d5619	200969650		SAMEA9253212	ERR10003307	ERX9544291	PRJEB55063	ERP139934
AtlanticSalmon	BodyMap	Muscle	Mature	Female		SAMEA9253215	ChIP-Seq	Input	1	C1230566	ERR10003310	ERX9544318	PRJEB55063	ERP139934	aa8562d3ae88f0146f5928df27fcceaa	6bba995c8545f88506e8b1506149e726	264147966		SAMEA9253216	ERR10003308	ERX9544331	PRJEB55063	ERP139934
AtlanticSalmon	BodyMap	Brain	Mature	Female	SAMEA9253107	SAMEA9253131	ChIP-Seq	H3K27ac	2	C1230621	ERR10003311	ERX9544307	PRJEB55063	ERP139934	a49c082631afac4d6aaf613c6613aa25	2a4c7b04cc452c8ae2cde2552c032b0f	117687302	https://www.ebi.ac.uk/biosamples/samples/	SAMEA9253213	ERR10003309	ERX9544300	PRJEB55063	ERP139934
AtlanticSalmon	BodyMap	Gonad	Mature	Female	SAMEA9253113	SAMEA9253133	ChIP-Seq	H3K27ac	3	C1230623	ERR10003313	ERX9544325	PRJEB55063	ERP139934	494de137777f0afdf711af8ef71bba5a	83b4a2361607be342cb7ad09cc992c30	121779246	https://www.ebi.ac.uk/biosamples/samples/	SAMEA9253215	ERR10003310	ERX9544318	PRJEB55063	ERP139934
AtlanticSalmon	BodyMap	Liver	Mature	Female	SAMEA9253107	SAMEA9253135	ChIP-Seq	H3K27ac	2	C1230625	ERR10003314	ERX9544298	PRJEB55063	ERP139934	82ddfd82ced2125623bde27e982a6376	5f050df75eb70c55ba71d7f9ec73f262	92823594	SAMEA9253107	SAMEA9253131	ERR10003311	ERX9544307	PRJEB55063	ERP139934
AtlanticSalmon	BodyMap	Muscle	Mature	Female	SAMEA9253107	SAMEA9253136	ChIP-Seq	H3K27ac	2	C1230626	ERR10003315	ERX9544316	PRJEB55063	ERP139934	3054080759002f913451e25e9c1cd6da	15e08542fa25e2771b23ac3c0caa6736	138753310	SAMEA9253113	SAMEA9253133	ERR10003313	ERX9544325	PRJEB55063	ERP139934
AtlanticSalmon	BodyMap	Brain	Mature	Female	SAMEA9253107	SAMEA9253131	ChIP-Seq	H3K27me3	2	C1230631	ERR10003316	ERX9544308	PRJEB55063	ERP139934	57d8ab42507586aaa764cd299fe2c405	5ffbdea99789ed8325c92aca8113839f	123374140	SAMEA9253107	SAMEA9253135	ERR10003314	ERX9544298	PRJEB55063	ERP139934
AtlanticSalmon	BodyMap	Gonad	Mature	Female	SAMEA9253113	SAMEA9253133	ChIP-Seq	H3K27me3	3	C1230633	ERR10003318	ERX9544326	PRJEB55063	ERP139934	816dd2e28986a6a078ea0eb629381cf5	34cdb40dead7976147da7660b4aecfd8	121791974	SAMEA9253107	SAMEA9253136	ERR10003315	ERX9544316	PRJEB55063	ERP139934
AtlanticSalmon	BodyMap	Liver	Mature	Female	SAMEA9253107	SAMEA9253135	ChIP-Seq	H3K27me3	2	C1230635	ERR10003319	ERX9544299	PRJEB55063	ERP139934	18ec02d5e6803f3ff86ac32ce27bfc2a	1bef2702ad6c42d8566684a290961a22	92773226	SAMEA9253107	SAMEA9253131	ERR10003316	ERX9544308	PRJEB55063	ERP139934
AtlanticSalmon	BodyMap	Muscle	Mature	Female	SAMEA9253107	SAMEA9253136	ChIP-Seq	H3K27me3	2	C1230636	ERR10003320	ERX9544317	PRJEB55063	ERP139934	36879cfa3def6b64ba1bb706ce4ff70a	237da59da1b282661b84b8db9cdc1c6f	116452808	SAMEA9253113	SAMEA9253133	ERR10003318	ERX9544326	PRJEB55063	ERP139934
AtlanticSalmon	BodyMap	Brain	Mature	Female	SAMEA9253107	SAMEA9253131	ChIP-Seq	H3K4me1	2	C1230641	ERR10003321	ERX9544305	PRJEB55063	ERP139934	6e09266a5669f638e0041d993cf511ae	46f6b3a6ba04a66a6dd8d9897a1cded3	97463600	SAMEA9253107	SAMEA9253135	ERR10003319	ERX9544299	PRJEB55063	ERP139934
AtlanticSalmon	BodyMap	Gonad	Mature	Female	SAMEA9253107	SAMEA9253133	ChIP-Seq	H3K4me1	3	C1230643	ERR10003323	ERX9544323	PRJEB55063	ERP139934	2b320b59f30d80c3bfd92c0ee7527a4e	186da95429873b29a9f9fec4aeb7c8f1	113686886	SAMEA9253107	SAMEA9253136	ERR10003320	ERX9544317	PRJEB55063	ERP139934
AtlanticSalmon	BodyMap	Liver	Mature	Female	SAMEA9253107	SAMEA9253135	ChIP-Seq	H3K4me1	2	C1230645	ERR10003324	ERX9544296	PRJEB55063	ERP139934	b4b020f99ec64f7c1d55176f60a21ea2	979fd71f7970127372400bafdb4390df	117949924	SAMEA9253107	SAMEA9253131	ERR10003321	ERX9544305	PRJEB55063	ERP139934
AtlanticSalmon	BodyMap	Muscle	Mature	Female	SAMEA9253107	SAMEA9253136	ChIP-Seq	H3K4me1	2	C1230646	ERR10003325	ERX9544314	PRJEB55063	ERP139934	7b55f1a68417b308631698365c60c204	5666f73b91a66124d6181d528944e006	102200134	SAMEA9253107	SAMEA9253133	ERR10003323	ERX9544323	PRJEB55063	ERP139934
AtlanticSalmon	BodyMap	Brain	Mature	Female	SAMEA9253107	SAMEA9253131	ChIP-Seq	H3K4me3	2	C1230651	ERR10003326	ERX9544306	PRJEB55063	ERP139934	0be8e58e3768db60c84aaf4da38e5bea	0e48b36dacb6f8e434fa73d9fbcc2a1a	99761420	SAMEA9253107	SAMEA9253135	ERR10003324	ERX9544296	PRJEB55063	ERP139934
AtlanticSalmon	BodyMap	Gonad	Mature	Female	SAMEA9253107	SAMEA9253133	ChIP-Seq	H3K4me3	3	C1230653	ERR10003328	ERX9544324	PRJEB55063	ERP139934	1ee52a910d50996188401ebbcec44769	d552dbb126b7dc45ca80ddd0ed2d502a	127801734	SAMEA9253107	SAMEA9253136	ERR10003325	ERX9544314	PRJEB55063	ERP139934
AtlanticSalmon	BodyMap	Liver	Mature	Female	SAMEA9253107	SAMEA9253135	ChIP-Seq	H3K4me3	2	C1230655	ERR10003329	ERX9544297	PRJEB55063	ERP139934	9ace46987abff45400872a9c7ffac137	cbaf982fa2813b28783c8c957a8d6bd3	104013286	SAMEA9253107	SAMEA9253131	ERR10003326	ERX9544306	PRJEB55063	ERP139934
AtlanticSalmon	BodyMap	Muscle	Mature	Female	SAMEA9253107	SAMEA9253136	ChIP-Seq	H3K4me3	2	C1230656	ERR10003330	ERX9544315	PRJEB55063	ERP139934	a72a2ef384ac6d154784671d184bad86	380b57db8a500360312d7961b56d317f	90237054	SAMEA9253107	SAMEA9253133	ERR10003328	ERX9544324	PRJEB55063	ERP139934
AtlanticSalmon	BodyMap	Brain	Mature	Male	SAMEA9253108	SAMEA9253138	ChIP-Seq	H3K27ac	1	C1240421	ERR10003331	ERX9544205	PRJEB55063	ERP139934	682aeca4470e884f01a01e47c38a0aac	2a7ee48da4edde41bab3110e226c404e	102269790	SAMEA9253107	SAMEA9253135	ERR10003329	ERX9544297	PRJEB55063	ERP139934
AtlanticSalmon	BodyMap	Gonad	Mature	Male	SAMEA9253114	SAMEA9253140	ChIP-Seq	H3K27ac	1	C1240423	ERR10003333	ERX9544223	PRJEB55063	ERP139934	5054fd323c6edb83dfbb24890d4fd891	6ae3a2ddf24b9a1b0a1aaa3b17e16fc5	111696942	SAMEA9253107	SAMEA9253136	ERR10003330	ERX9544315	PRJEB55063	ERP139934
AtlanticSalmon	BodyMap	Liver	Mature	Male	SAMEA9253108	SAMEA9253142	ChIP-Seq	H3K27ac	1	C1240425	ERR10003334	ERX9544196	PRJEB55063	ERP139934	128519ab931d4cab598d22c7c7ea615c	528f2d286decf3c123dc93c8eed520f0	99872422	SAMEA9253108	SAMEA9253138	ERR10003331	ERX9544205	PRJEB55063	ERP139934
AtlanticSalmon	BodyMap	Muscle	Mature	Male	SAMEA9253108	SAMEA9253143	ChIP-Seq	H3K27ac	1	C1240426	ERR10003335	ERX9544214	PRJEB55063	ERP139934	bddc83823cbf0c9ef92faf7af0071546	6ceeb915e75b9243da62329156434541	101062562	SAMEA9253114	SAMEA9253140	ERR10003333	ERX9544223	PRJEB55063	ERP139934
AtlanticSalmon	BodyMap	Brain	Mature	Male	SAMEA9253108	SAMEA9253138	ChIP-Seq	H3K27me3	1	C1240431	ERR10003336	ERX9544206	PRJEB55063	ERP139934	d44fea53b1ae84300908154f77847f6f	2a8a6798445980bc59a294a269bb3c78	101890930	SAMEA9253108	SAMEA9253142	ERR10003334	ERX9544196	PRJEB55063	ERP139934
AtlanticSalmon	BodyMap	Gonad	Mature	Male	SAMEA9253114	SAMEA9253140	ChIP-Seq	H3K27me3	1	C1240433	ERR10003338	ERX9544224	PRJEB55063	ERP139934	63676231d08536811641dc43c8c1d73f	c4b07b003d9855aa7a9ca7169d0bce04	103199836	SAMEA9253108	SAMEA9253143	ERR10003335	ERX9544214	PRJEB55063	ERP139934
AtlanticSalmon	BodyMap	Liver	Mature	Male	SAMEA9253108	SAMEA9253142	ChIP-Seq	H3K27me3	1	C1240435	ERR10003339	ERX9544197	PRJEB55063	ERP139934	78e7e9ddbb7c288a30c463d993d73203	7bb85bff48b56e7c1d5cf6a81af07d10	98884700	SAMEA9253108	SAMEA9253138	ERR10003336	ERX9544206	PRJEB55063	ERP139934
AtlanticSalmon	BodyMap	Muscle	Mature	Male	SAMEA9253108	SAMEA9253143	ChIP-Seq	H3K27me3	1	C1240436	ERR10003340	ERX9544215	PRJEB55063	ERP139934	c38bdf2e526302b7eefc352057b678b0	545b62db20319deaaaafb2d9963a4f4a	90587086	SAMEA9253114	SAMEA9253140	ERR10003338	ERX9544224	PRJEB55063	ERP139934
AtlanticSalmon	BodyMap	Brain	Mature	Male	SAMEA9253108	SAMEA9253138	ChIP-Seq	H3K4me1	1	C1240441	ERR10003341	ERX9544203	PRJEB55063	ERP139934	c80b5bf725977a78c24802b3c9735737	42960b3c84ddc55249935a99a2a9fdb7	95553396	SAMEA9253108	SAMEA9253142	ERR10003339	ERX9544197	PRJEB55063	ERP139934
AtlanticSalmon	BodyMap	Gonad	Mature	Male	SAMEA9253108	SAMEA9253140	ChIP-Seq	H3K4me1	1	C1240443	ERR10003343	ERX9544221	PRJEB55063	ERP139934	eb268e5e54cca4b3b992bfd3ff59d99e	bef3e57b2c76a43ea07ca512af19ad1d	92070632	SAMEA9253108	SAMEA9253143	ERR10003340	ERX9544215	PRJEB55063	ERP139934
AtlanticSalmon	BodyMap	Liver	Mature	Male	SAMEA9253108	SAMEA9253142	ChIP-Seq	H3K4me1	1	C1240445	ERR10003344	ERX9544194	PRJEB55063	ERP139934	b44588aa42027af63757690619b6526f	fa4d6b0f859e8253adb1c1ad62914436	102799234	SAMEA9253108	SAMEA9253138	ERR10003341	ERX9544203	PRJEB55063	ERP139934
AtlanticSalmon	BodyMap	Muscle	Mature	Male	SAMEA9253108	SAMEA9253143	ChIP-Seq	H3K4me1	1	C1240446	ERR10003345	ERX9544212	PRJEB55063	ERP139934	1f7c9330cfd953be468ca5ac2f94f753	5423b70000bdc526a78bfcb0b0086e0c	110401908	SAMEA9253108	SAMEA9253140	ERR10003343	ERX9544221	PRJEB55063	ERP139934
AtlanticSalmon	BodyMap	Brain	Mature	Male	SAMEA9253108	SAMEA9253138	ChIP-Seq	H3K4me3	1	C1240451	ERR10003346	ERX9544204	PRJEB55063	ERP139934	65d2d7d4dba0325e1e2f17f705446853	eb7a52acaf2b45f8178503415737241b	103882804	SAMEA9253108	SAMEA9253142	ERR10003344	ERX9544194	PRJEB55063	ERP139934
AtlanticSalmon	BodyMap	Gonad	Mature	Male	SAMEA9253108	SAMEA9253140	ChIP-Seq	H3K4me3	1	C1240453	ERR10003348	ERX9544222	PRJEB55063	ERP139934	d9d42f7fc487c9ba18e6c1a5ce1d7b7a	9ff2d210832568319117b46c1fc9bbc4	89692934	SAMEA9253108	SAMEA9253143	ERR10003345	ERX9544212	PRJEB55063	ERP139934
AtlanticSalmon	BodyMap	Liver	Mature	Male	SAMEA9253108	SAMEA9253142	ChIP-Seq	H3K4me3	1	C1240455	ERR10003349	ERX9544195	PRJEB55063	ERP139934	04bdda1992d1def964b317c8e673d479	5988c02199e1c4e8ce52033d5bdcd004	106916704	SAMEA9253108	SAMEA9253138	ERR10003346	ERX9544204	PRJEB55063	ERP139934
AtlanticSalmon	BodyMap	Muscle	Mature	Male	SAMEA9253108	SAMEA9253143	ChIP-Seq	H3K4me3	1	C1240456	ERR10003350	ERX9544213	PRJEB55063	ERP139934	4674c0a5cb169c3855c3276550a4af6c	3d6bbb700f5a1a1b70b9ae6bf067d74d	125132202	SAMEA9253108	SAMEA9253140	ERR10003348	ERX9544222	PRJEB55063	ERP139934
AtlanticSalmon	BodyMap	Brain	Mature	Male		SAMEA9253204	ChIP-Seq	Input	1	C1240461	ERR10003351	ERX9544211	PRJEB55063	ERP139934	884d3b9237d427512d08b7deeb9ebe57	e09f24273ab25ffb37183b153fbdc1b7	194681500		SAMEA9253142	ERR10003349	ERX9544195	PRJEB55063	ERP139934
AtlanticSalmon	BodyMap	Gill	Mature	Male		SAMEA9253202	ChIP-Seq	Input	1	C1240462	ERR10003352	ERX9544193	PRJEB55063	ERP139934	9b39ef429901ebddab8f064a1ced0085	0198f18e77355fa3f603df7966e5803f	195425538		SAMEA9253143	ERR10003350	ERX9544213	PRJEB55063	ERP139934	used for blacklist
AtlanticSalmon	BodyMap	Gonad	Mature	Male		SAMEA9253206	ChIP-Seq	Input	1	C1240463	ERR10003353	ERX9544233	PRJEB55063	ERP139934	71f5e7af9bb7a9578bd588ac19ae5571	71a1b0f2b67c6033d3656e955f329125	238829358		SAMEA9253204	ERR10003351	ERX9544211	PRJEB55063	ERP139934
AtlanticSalmon	BodyMap	Liver	Mature	Male		SAMEA9253203	ChIP-Seq	Input	1	C1240465	ERR10003354	ERX9544202	PRJEB55063	ERP139934	ed4add575213e8a9972c7316706f8d5c	bc92324ba145be2b3aced09f343821cd	196316360		SAMEA9253202	ERR10003352	ERX9544193	PRJEB55063	ERP139934
AtlanticSalmon	BodyMap	Muscle	Mature	Male		SAMEA9253205	ChIP-Seq	Input	1	C1240466	ERR10003355	ERX9544220	PRJEB55063	ERP139934	6e372d95c85970541b43563aac0350d7	b1705fe58270e2038f8c953efb3d6ffa	215396546		SAMEA9253206	ERR10003353	ERX9544233	PRJEB55063	ERP139934
AtlanticSalmon	BodyMap	Gonad	Mature	Male	SAMEA9253115	SAMEA9253147	ChIP-Seq	H3K27ac	2	C1240523	ERR10003356	ERX9544231	PRJEB55063	ERP139934	74829a2dcdeac3c4a7d824b08ee96463	fff63a19b7ea9d6c691b7b15cb842751	124031028	https://www.ebi.ac.uk/biosamples/samples/	SAMEA9253203	ERR10003354	ERX9544202	PRJEB55063	ERP139934
AtlanticSalmon	BodyMap	Gonad	Mature	Male	SAMEA9253115	SAMEA9253147	ChIP-Seq	H3K27me3	2	C1240533	ERR10003357	ERX9544232	PRJEB55063	ERP139934	0147bcac842d7f40c9c09a7a7dd4004b	dcbdb11f2ec0247ea725739c86b04bdb	124068792	https://www.ebi.ac.uk/biosamples/samples/	SAMEA9253205	ERR10003355	ERX9544220	PRJEB55063	ERP139934
AtlanticSalmon	BodyMap	Gonad	Mature	Male	SAMEA9253109	SAMEA9253147	ChIP-Seq	H3K4me1	2	C1240543	ERR10003358	ERX9544229	PRJEB55063	ERP139934	3d509ecddb7f42fd65d5e6b69a8da846	25ca6e3634c64b7d74da32c8127cf54a	158635888	SAMEA9253115	SAMEA9253147	ERR10003356	ERX9544231	PRJEB55063	ERP139934
AtlanticSalmon	BodyMap	Gonad	Mature	Male	SAMEA9253109	SAMEA9253147	ChIP-Seq	H3K4me3	2	C1240553	ERR10003359	ERX9544230	PRJEB55063	ERP139934	e189d0c826e9b1850a126ccd9951424d	31a4fdef1a4a7dba45feac5c1c2ad260	118025240	SAMEA9253115	SAMEA9253147	ERR10003357	ERX9544232	PRJEB55063	ERP139934
AtlanticSalmon	BodyMap	Brain	Mature	Male	SAMEA9253110	SAMEA9253152	ChIP-Seq	H3K27ac	2	C1240621	ERR10003360	ERX9544209	PRJEB55063	ERP139934	11b75699783b146b91d6d2b6e61e4b6f	a3f40a6e73a46b69bfaac5667c1635e2	100277766	SAMEA9253109	SAMEA9253147	ERR10003358	ERX9544229	PRJEB55063	ERP139934
AtlanticSalmon	BodyMap	Gonad	Mature	Male	SAMEA9253116	SAMEA9253154	ChIP-Seq	H3K27ac	3	C1240623	ERR10003362	ERX9544227	PRJEB55063	ERP139934	d920f4a5eb6b4b4ab3b1edf0811f85ec	49c7fa8c6f457652a11973d6f72a6c3c	97344314	SAMEA9253109	SAMEA9253147	ERR10003359	ERX9544230	PRJEB55063	ERP139934
AtlanticSalmon	BodyMap	Liver	Mature	Male	SAMEA9253110	SAMEA9253156	ChIP-Seq	H3K27ac	2	C1240625	ERR10003363	ERX9544200	PRJEB55063	ERP139934	c6f71fa4dc3a1072e550f58a87a5e2c0	2ec79312935570421c10328447094b25	119954174	SAMEA9253110	SAMEA9253152	ERR10003360	ERX9544209	PRJEB55063	ERP139934
AtlanticSalmon	BodyMap	Muscle	Mature	Male	SAMEA9253110	SAMEA9253157	ChIP-Seq	H3K27ac	2	C1240626	ERR10003364	ERX9544218	PRJEB55063	ERP139934	41848b7c687f1624888a6ba5b13b3d53	8471d5bea1325acc41abeb43bac90f3f	96004532	SAMEA9253116	SAMEA9253154	ERR10003362	ERX9544227	PRJEB55063	ERP139934
AtlanticSalmon	BodyMap	Brain	Mature	Male	SAMEA9253110	SAMEA9253152	ChIP-Seq	H3K27me3	2	C1240631	ERR10003365	ERX9544210	PRJEB55063	ERP139934	2dc91fcdbd73e6b28f08020d812d072a	2fbc87dacef2ec885d84ca6022064e50	90210250	SAMEA9253110	SAMEA9253156	ERR10003363	ERX9544200	PRJEB55063	ERP139934
AtlanticSalmon	BodyMap	Gonad	Mature	Male	SAMEA9253116	SAMEA9253154	ChIP-Seq	H3K27me3	3	C1240633	ERR10003367	ERX9544228	PRJEB55063	ERP139934	78edb8daca18cd3754a91543cd116363	f5cd1dcae36331fcb518faaa1029f157	93514370	SAMEA9253110	SAMEA9253157	ERR10003364	ERX9544218	PRJEB55063	ERP139934
AtlanticSalmon	BodyMap	Liver	Mature	Male	SAMEA9253110	SAMEA9253156	ChIP-Seq	H3K27me3	2	C1240635	ERR10003368	ERX9544201	PRJEB55063	ERP139934	e5ffdf9d1ae21b2c46462ddddded9282	df071291c08d4d2e77cb400d7cca086d	96808610	SAMEA9253110	SAMEA9253152	ERR10003365	ERX9544210	PRJEB55063	ERP139934
AtlanticSalmon	BodyMap	Muscle	Mature	Male	SAMEA9253110	SAMEA9253157	ChIP-Seq	H3K27me3	2	C1240636	ERR10003369	ERX9544219	PRJEB55063	ERP139934	27765dd075b6bb5f76139f0f5a7b9d03	7827115c4a8b08a7325609c4e2bb4ac6	94492874	SAMEA9253116	SAMEA9253154	ERR10003367	ERX9544228	PRJEB55063	ERP139934
AtlanticSalmon	BodyMap	Brain	Mature	Male	SAMEA9253110	SAMEA9253152	ChIP-Seq	H3K4me1	2	C1240641	ERR10003370	ERX9544207	PRJEB55063	ERP139934	19811ed0e76442cdb09c6eb135bd3c69	8baee7c7e1c16448386f6885159b193f	94031494	SAMEA9253110	SAMEA9253156	ERR10003368	ERX9544201	PRJEB55063	ERP139934
AtlanticSalmon	BodyMap	Gonad	Mature	Male	SAMEA9253110	SAMEA9253154	ChIP-Seq	H3K4me1	3	C1240643	ERR10003372	ERX9544225	PRJEB55063	ERP139934	eb18019beecea46191c69d56c2aa2d71	b02781d21513765a0d8180ebe6a3bbd4	98492060	SAMEA9253110	SAMEA9253157	ERR10003369	ERX9544219	PRJEB55063	ERP139934
AtlanticSalmon	BodyMap	Liver	Mature	Male	SAMEA9253110	SAMEA9253156	ChIP-Seq	H3K4me1	2	C1240645	ERR10003373	ERX9544198	PRJEB55063	ERP139934	9974625973470cf37241932155f694e4	b9c61bfca15086be6bb49d450de6495f	131250682	SAMEA9253110	SAMEA9253152	ERR10003370	ERX9544207	PRJEB55063	ERP139934
AtlanticSalmon	BodyMap	Muscle	Mature	Male	SAMEA9253110	SAMEA9253157	ChIP-Seq	H3K4me1	2	C1240646	ERR10003374	ERX9544216	PRJEB55063	ERP139934	4997c7ecc4fee51a9f402ce2ee4def3f	3c7ed927783e6bc6fceea25e900407cd	113831656	SAMEA9253110	SAMEA9253154	ERR10003372	ERX9544225	PRJEB55063	ERP139934
AtlanticSalmon	BodyMap	Brain	Mature	Male	SAMEA9253110	SAMEA9253152	ChIP-Seq	H3K4me3	2	C1240651	ERR10003375	ERX9544208	PRJEB55063	ERP139934	f8ed8d66135d83c6052ff9a0a2a0ac1d	1a83328dc992834e7b7119c7b9b6e65f	108669632	SAMEA9253110	SAMEA9253156	ERR10003373	ERX9544198	PRJEB55063	ERP139934
AtlanticSalmon	BodyMap	Gonad	Mature	Male	SAMEA9253110	SAMEA9253154	ChIP-Seq	H3K4me3	3	C1240653	ERR10003377	ERX9544226	PRJEB55063	ERP139934	e844add307918271ff0eadb3bf45a8d6	d7aeb3e8ff833b7c8e39a44e624877d3	94271134	SAMEA9253110	SAMEA9253157	ERR10003374	ERX9544216	PRJEB55063	ERP139934
AtlanticSalmon	BodyMap	Liver	Mature	Male	SAMEA9253110	SAMEA9253156	ChIP-Seq	H3K4me3	2	C1240655	ERR10003378	ERX9544199	PRJEB55063	ERP139934	55ac779a586972b549954e15adcdae97	a5b77ff76763845f3bcfb07e0d9f7336	97168760	SAMEA9253110	SAMEA9253152	ERR10003375	ERX9544208	PRJEB55063	ERP139934
AtlanticSalmon	BodyMap	Muscle	Mature	Male	SAMEA9253110	SAMEA9253157	ChIP-Seq	H3K4me3	2	C1240656	ERR10003379	ERX9544217	PRJEB55063	ERP139934	fa73b95b18cdd6c649fc69b5ba98a0df	b0d9dde81b725778ed28d3825b84f734	101825162	SAMEA9253110	SAMEA9253154	ERR10003377	ERX9544226	PRJEB55063	ERP139934
AtlanticSalmon	BodyMap	Brain	Immature	Female	SAMEA9253111	SAMEA9253159	RNA-Seq	reverse	1	C1310101	ERR6664129	ERX6289173	PRJEB47409	ERP131682	9958e68c1a84c047f891f4379d5d397b	8a93961e61a398de1c18d0191bf89d8d	67685996	SAMEA9253110	SAMEA9253156	ERR10003378	ERX9544199	PRJEB55063	ERP139934
AtlanticSalmon	BodyMap	Gill	Immature	Female	SAMEA9253111	SAMEA9253160	RNA-Seq	reverse	1	C1310102	ERR6664130	ERX6289174	PRJEB47409	ERP131682	eec3f917b953d9028f8247e515aecf6e	ee16331a7de9fa2f78589459c57a6bdc	59802140	SAMEA9253110	SAMEA9253157	ERR10003379	ERX9544217	PRJEB55063	ERP139934
AtlanticSalmon	BodyMap	Gonad	Immature	Female	SAMEA9253111	SAMEA9253161	RNA-Seq	reverse	1	C1310103	ERR6664131	ERX6289175	PRJEB47409	ERP131682	b37f2f557e67ec3bfc53b79b3e9dd705	fc118a5b4301a6d57b0bc86cd65fefa5	63573064	SAMEA9253111	SAMEA9253159	ERR6664129	ERX6289173	PRJEB47409	ERP131682
AtlanticSalmon	BodyMap	HeadKidney	Immature	Female	SAMEA9253111	SAMEA9253162	RNA-Seq	reverse	1	C1310104	ERR6664132	ERX6289176	PRJEB47409	ERP131682	84666bd35c57883adec827c8fb7ef309	f8e893b89d50836347e80e5e2cfe918a	62232434	SAMEA9253111	SAMEA9253160	ERR6664130	ERX6289174	PRJEB47409	ERP131682
AtlanticSalmon	BodyMap	Liver	Immature	Female	SAMEA9253111	SAMEA9253163	RNA-Seq	reverse	1	C1310105	ERR6664133	ERX6289177	PRJEB47409	ERP131682	697845e77e09067dcfb6500f8e0deedd	6fbf29e8dcedfd5bf5dd7a3ce6e9d14d	66677286	SAMEA9253111	SAMEA9253161	ERR6664131	ERX6289175	PRJEB47409	ERP131682
AtlanticSalmon	BodyMap	Muscle	Immature	Female	SAMEA9253111	SAMEA9253164	RNA-Seq	reverse	1	C1310106	ERR6664134	ERX6289178	PRJEB47409	ERP131682	5fb56ce2cf186469c49254518c1f49cb	30644742b77eafe44e2c402dc3a383f0	61165834	SAMEA9253111	SAMEA9253162	ERR6664132	ERX6289176	PRJEB47409	ERP131682
AtlanticSalmon	BodyMap	SuppDistalIntestine	Immature	Female	SAMEA9253111	SAMEA9253165	RNA-Seq	reverse	1	C1310107	ERR6664135	ERX6289179	PRJEB47409	ERP131682	0d4c35a0276116715fd4a7beec05e8ae	e626e4ba0cf75cfa4b955fdc53bfb843	62289868	SAMEA9253111	SAMEA9253163	ERR6664133	ERX6289177	PRJEB47409	ERP131682
AtlanticSalmon	BodyMap	Brain	Immature	Female	SAMEA9253112	SAMEA9253166	RNA-Seq	reverse	2	C1310201	ERR6664136	ERX6289180	PRJEB47409	ERP131682	86fda5c4c87b781d52e67864a1292a83	28d90fe52c1e7ed674309a5695bf3eff	62880744	SAMEA9253111	SAMEA9253164	ERR6664134	ERX6289178	PRJEB47409	ERP131682
AtlanticSalmon	BodyMap	Gill	Immature	Female	SAMEA9253112	SAMEA9253167	RNA-Seq	reverse	2	C1310202	ERR6664137	ERX6289181	PRJEB47409	ERP131682	72be27bf77dda75d1c4c5d9ff2e4f39d	0839c178241e6210f5d09e2b16fb1612	60282688	SAMEA9253111	SAMEA9253165	ERR6664135	ERX6289179	PRJEB47409	ERP131682
AtlanticSalmon	BodyMap	Gonad	Immature	Female	SAMEA9253112	SAMEA9253169	RNA-Seq	reverse	2	C1310203	ERR6664138	ERX6289182	PRJEB47409	ERP131682	236bb077a10414e725be3c2b49857519	d79fd8f2176505b895dbf844b5836ef3	62671278	SAMEA9253112	SAMEA9253166	ERR6664136	ERX6289180	PRJEB47409	ERP131682
AtlanticSalmon	BodyMap	HeadKidney	Immature	Female	SAMEA9253112	SAMEA9253170	RNA-Seq	reverse	2	C1310204	ERR6664139	ERX6289183	PRJEB47409	ERP131682	a2334e05f2cdc4191157bbea87ed506a	4c8ed761f7b772e497100c9493c116f1	62015376	SAMEA9253112	SAMEA9253167	ERR6664137	ERX6289181	PRJEB47409	ERP131682
AtlanticSalmon	BodyMap	Liver	Immature	Female	SAMEA9253112	SAMEA9253171	RNA-Seq	reverse	2	C1310205	ERR6664140	ERX6289184	PRJEB47409	ERP131682	3113681c02aa68a14add35968060b500	0683645e4567d722a5ae7b333f718702	75839862	SAMEA9253112	SAMEA9253169	ERR6664138	ERX6289182	PRJEB47409	ERP131682
AtlanticSalmon	BodyMap	Muscle	Immature	Female	SAMEA9253112	SAMEA9253172	RNA-Seq	reverse	2	C1310206	ERR6664141	ERX6289185	PRJEB47409	ERP131682	1e2467c82f7bc1e99098aacfb2368b5a	359b1d22da3c6eb81c671de4c8b2bfae	62179418	SAMEA9253112	SAMEA9253170	ERR6664139	ERX6289183	PRJEB47409	ERP131682
AtlanticSalmon	BodyMap	SuppDistalIntestine	Immature	Female	SAMEA9253112	SAMEA9253173	RNA-Seq	reverse	2	C1310207	ERR6664142	ERX6289186	PRJEB47409	ERP131682	692e5db3816641f17c4c946996449711	b598051eb8ca6d3d4136b8e5887d9ade	62672618	SAMEA9253112	SAMEA9253171	ERR6664140	ERX6289184	PRJEB47409	ERP131682
AtlanticSalmon	BodyMap	Brain	Immature	Female	SAMEA9253113	SAMEA9253174	RNA-Seq	reverse	3	C1310301	ERR6664143	ERX6289145	PRJEB47409	ERP131682	cfb02a0052cce4a0d7dd40ebe9ec3dc4	04fd1c16ceea2c6a78e155d5a8705dc7	61762036	SAMEA9253112	SAMEA9253172	ERR6664141	ERX6289185	PRJEB47409	ERP131682
AtlanticSalmon	BodyMap	Gill	Immature	Female	SAMEA9253113	SAMEA9253175	RNA-Seq	reverse	3	C1310302	ERR6664144	ERX6289146	PRJEB47409	ERP131682	385db835f098f90633fdfcbdb58b5c53	6000c5c18303293f4fb319ccfeafbf50	65858012	SAMEA9253112	SAMEA9253173	ERR6664142	ERX6289186	PRJEB47409	ERP131682
AtlanticSalmon	BodyMap	Gonad	Immature	Female	SAMEA9253113	SAMEA9253176	RNA-Seq	reverse	3	C1310303	ERR6664145	ERX6289147	PRJEB47409	ERP131682	3ce98eaa08642347469fcc5d72e4b812	761c96121db266af6fa8fb93dff47cbf	66829848	SAMEA9253113	SAMEA9253174	ERR6664143	ERX6289145	PRJEB47409	ERP131682
AtlanticSalmon	BodyMap	HeadKidney	Immature	Female	SAMEA9253113	SAMEA9253177	RNA-Seq	reverse	3	C1310304	ERR6664146	ERX6289148	PRJEB47409	ERP131682	daf60518a8748f538b4d65531e0a092a	39fff25769735cfc681fb4b24ec2a23c	61368740	SAMEA9253113	SAMEA9253175	ERR6664144	ERX6289146	PRJEB47409	ERP131682
AtlanticSalmon	BodyMap	Liver	Immature	Female	SAMEA9253113	SAMEA9253178	RNA-Seq	reverse	3	C1310305	ERR6664147	ERX6289149	PRJEB47409	ERP131682	1f955978fce8c80fa287365d6a741e2c	6dfc05a954804247f093e4777459ab17	60016038	SAMEA9253113	SAMEA9253176	ERR6664145	ERX6289147	PRJEB47409	ERP131682
AtlanticSalmon	BodyMap	Muscle	Immature	Female	SAMEA9253113	SAMEA9253179	RNA-Seq	reverse	3	C1310306	ERR6664148	ERX6289150	PRJEB47409	ERP131682	f8780b9405c9684b0c1fdf4d08c44dec	1c042d8316a54105a7fb95d3e3e2c213	60190586	SAMEA9253113	SAMEA9253177	ERR6664146	ERX6289148	PRJEB47409	ERP131682
AtlanticSalmon	BodyMap	SuppDistalIntestine	Immature	Female	SAMEA9253113	SAMEA9253180	RNA-Seq	reverse	3	C1310307	ERR6664149	ERX6289151	PRJEB47409	ERP131682	ba0b04b3f35eb666bd4e77fc837d5ead	893e7866c4819e6ab1677c4e948ca430	76106412	SAMEA9253113	SAMEA9253178	ERR6664147	ERX6289149	PRJEB47409	ERP131682
AtlanticSalmon	BodyMap	Brain	Immature	Male	SAMEA9253114	SAMEA9253181	RNA-Seq	reverse	1	C1320101	ERR6664150	ERX6289152	PRJEB47409	ERP131682	12a320926470b689b626ad78945e01ae	b5ce7b30049d82356a89c24619ab743c	63251530	SAMEA9253113	SAMEA9253179	ERR6664148	ERX6289150	PRJEB47409	ERP131682
AtlanticSalmon	BodyMap	Gill	Immature	Male	SAMEA9253114	SAMEA9253182	RNA-Seq	reverse	1	C1320102	ERR6664151	ERX6289153	PRJEB47409	ERP131682	1e60c7da5107f59cee57caca5902525a	0062266948894b8c245db107d640c853	59043766	SAMEA9253113	SAMEA9253180	ERR6664149	ERX6289151	PRJEB47409	ERP131682
AtlanticSalmon	BodyMap	Gonad	Immature	Male	SAMEA9253114	SAMEA9253183	RNA-Seq	reverse	1	C1320103	ERR6664152	ERX6289154	PRJEB47409	ERP131682	83b7d97472b86b10885badd45b3ff6f1	635ce9bad9c83b9783a2d7730521cb60	64360276	SAMEA9253114	SAMEA9253181	ERR6664150	ERX6289152	PRJEB47409	ERP131682
AtlanticSalmon	BodyMap	HeadKidney	Immature	Male	SAMEA9253114	SAMEA9253184	RNA-Seq	reverse	1	C1320104	ERR6664153	ERX6289155	PRJEB47409	ERP131682	053d7e900e3fdf49a418ef068aecfa6c	b4912e4e29a61762dc74d5c3d153e507	61614012	SAMEA9253114	SAMEA9253182	ERR6664151	ERX6289153	PRJEB47409	ERP131682
AtlanticSalmon	BodyMap	Liver	Immature	Male	SAMEA9253114	SAMEA9253185	RNA-Seq	reverse	1	C1320105	ERR6664154	ERX6289156	PRJEB47409	ERP131682	dfb8b05af4f99f75be1f756e3e50fdd5	9ba45610ecad0be0dfdafa64ede3c409	70270096	SAMEA9253114	SAMEA9253183	ERR6664152	ERX6289154	PRJEB47409	ERP131682
AtlanticSalmon	BodyMap	Muscle	Immature	Male	SAMEA9253114	SAMEA9253186	RNA-Seq	reverse	1	C1320106	ERR6664155	ERX6289157	PRJEB47409	ERP131682	daa77ac7ef32487f7baf534775e84f53	675d8e39bc742421ddb314938727dbc1	61505338	SAMEA9253114	SAMEA9253184	ERR6664153	ERX6289155	PRJEB47409	ERP131682
AtlanticSalmon	BodyMap	SuppDistalIntestine	Immature	Male	SAMEA9253114	SAMEA9253187	RNA-Seq	reverse	1	C1320107	ERR6664156	ERX6289158	PRJEB47409	ERP131682	47b6ea2939c23c3969719a5563bae706	867652204d20f537b7e08a7a7123ced3	62351498	SAMEA9253114	SAMEA9253185	ERR6664154	ERX6289156	PRJEB47409	ERP131682
AtlanticSalmon	BodyMap	Brain	Immature	Male	SAMEA9253115	SAMEA9253188	RNA-Seq	reverse	2	C1320201	ERR6664157	ERX6289159	PRJEB47409	ERP131682	02840b4594a40b8d1c2038285bfbc4b1	3c2c666b5e6d78ed1c10a137ac0c6b37	64157724	SAMEA9253114	SAMEA9253186	ERR6664155	ERX6289157	PRJEB47409	ERP131682
AtlanticSalmon	BodyMap	Gill	Immature	Male	SAMEA9253115	SAMEA9253189	RNA-Seq	reverse	2	C1320202	ERR6664158	ERX6289160	PRJEB47409	ERP131682	45bd9aa1551fdad83e7fd06785d3fc6d	a8f4c0716907cf031ea93b36adee41a4	62084800	SAMEA9253114	SAMEA9253187	ERR6664156	ERX6289158	PRJEB47409	ERP131682
AtlanticSalmon	BodyMap	Gonad	Immature	Male	SAMEA9253115	SAMEA9253190	RNA-Seq	reverse	2	C1320203	ERR6664159	ERX6289161	PRJEB47409	ERP131682	b4125e9b14d6d315b62d6d44936a913b	fd59c1c1c9552499048450359e9eb0d0	64001736	SAMEA9253115	SAMEA9253188	ERR6664157	ERX6289159	PRJEB47409	ERP131682
AtlanticSalmon	BodyMap	HeadKidney	Immature	Male	SAMEA9253115	SAMEA9253191	RNA-Seq	reverse	2	C1320204	ERR6664160	ERX6289162	PRJEB47409	ERP131682	b0e3a8ea26c20d8d5cc24455487be16c	93c8b15c1af88a4c09e19334ea14aed2	62966576	SAMEA9253115	SAMEA9253189	ERR6664158	ERX6289160	PRJEB47409	ERP131682
AtlanticSalmon	BodyMap	Liver	Immature	Male	SAMEA9253115	SAMEA9253192	RNA-Seq	reverse	2	C1320205	ERR6664161	ERX6289163	PRJEB47409	ERP131682	485b1a84ecf6c0c1c11ab7a603b9a2aa	2fd57628c6cca5a57c211718c5da52d1	62050148	SAMEA9253115	SAMEA9253190	ERR6664159	ERX6289161	PRJEB47409	ERP131682
AtlanticSalmon	BodyMap	Muscle	Immature	Male	SAMEA9253115	SAMEA9253193	RNA-Seq	reverse	2	C1320206	ERR6664162	ERX6289164	PRJEB47409	ERP131682	a07e3bbbcedac296bde43304940105b1	18be325ee70ed6efec3d738a11cd36f1	62731698	SAMEA9253115	SAMEA9253191	ERR6664160	ERX6289162	PRJEB47409	ERP131682
AtlanticSalmon	BodyMap	SuppDistalIntestine	Immature	Male	SAMEA9253115	SAMEA9253194	RNA-Seq	reverse	2	C1320207	ERR6664163	ERX6289165	PRJEB47409	ERP131682	edafd6031932bac5d4a9d3e101926fda	800bca308db34a201a6e6b0631e1e2b6	62312698	SAMEA9253115	SAMEA9253192	ERR6664161	ERX6289163	PRJEB47409	ERP131682
AtlanticSalmon	BodyMap	Brain	Immature	Male	SAMEA9253116	SAMEA9253195	RNA-Seq	reverse	3	C1320301	ERR6664164	ERX6289166	PRJEB47409	ERP131682	1755ae171d0313891bef63d37eb671f4	28bace8b7b7f6588d80296e54a52bd5a	61580456	SAMEA9253115	SAMEA9253193	ERR6664162	ERX6289164	PRJEB47409	ERP131682
AtlanticSalmon	BodyMap	Gill	Immature	Male	SAMEA9253116	SAMEA9253196	RNA-Seq	reverse	3	C1320302	ERR6664165	ERX6289167	PRJEB47409	ERP131682	790519c1776dfe5d115f160fe97d85c6	730666c36905deb89731d6dafe2bc24b	62383412	SAMEA9253115	SAMEA9253194	ERR6664163	ERX6289165	PRJEB47409	ERP131682
AtlanticSalmon	BodyMap	Gonad	Immature	Male	SAMEA9253116	SAMEA9253197	RNA-Seq	reverse	3	C1320303	ERR6664166	ERX6289168	PRJEB47409	ERP131682	eaefb298babe4fa879053ad8347c9f1c	9eff748562410be132d67160f180f3b2	61057446	SAMEA9253116	SAMEA9253195	ERR6664164	ERX6289166	PRJEB47409	ERP131682
AtlanticSalmon	BodyMap	HeadKidney	Immature	Male	SAMEA9253116	SAMEA9253198	RNA-Seq	reverse	3	C1320304	ERR6664167	ERX6289169	PRJEB47409	ERP131682	9b4da84a8a29c147d08f394408f6ea2a	3a16353c14da646baf10ed5dfbd51295	58880606	SAMEA9253116	SAMEA9253196	ERR6664165	ERX6289167	PRJEB47409	ERP131682
AtlanticSalmon	BodyMap	Liver	Immature	Male	SAMEA9253116	SAMEA9253199	RNA-Seq	reverse	3	C1320305	ERR6664168	ERX6289170	PRJEB47409	ERP131682	b1fa4865c2cb523e814b81bc8dce8033	e9039375b72fc18b47414f6e5e11c2dc	62274802	SAMEA9253116	SAMEA9253197	ERR6664166	ERX6289168	PRJEB47409	ERP131682
AtlanticSalmon	BodyMap	Muscle	Immature	Male	SAMEA9253116	SAMEA9253200	RNA-Seq	reverse	3	C1320306	ERR6664169	ERX6289171	PRJEB47409	ERP131682	47991b0ebbe5da10cbf318dfb9aa6517	d5769bf1a2c5c630300fff9c1aeba4ed	67857020	SAMEA9253116	SAMEA9253198	ERR6664167	ERX6289169	PRJEB47409	ERP131682
AtlanticSalmon	BodyMap	SuppDistalIntestine	Immature	Male	SAMEA9253116	SAMEA9253201	RNA-Seq	reverse	3	C1320307	ERR6664170	ERX6289172	PRJEB47409	ERP131682	ad6b64a0126557094f444c76d3f115a6	f57e97aa1e14fd0233276997d99a35df	61118814	SAMEA9253116	SAMEA9253199	ERR6664168	ERX6289170	PRJEB47409	ERP131682
AtlanticSalmon	BodyMap	Brain	Mature	Female	SAMEA9253105	SAMEA9253117	RNA-Seq	reverse	1	C1330401	ERR6664171	ERX6289103	PRJEB47409	ERP131682	238e3514eb8e791211066a01225e0f35	0c9aac3f8e108e478659a2fb7bbf47e8	67606368	SAMEA9253116	SAMEA9253200	ERR6664169	ERX6289171	PRJEB47409	ERP131682
AtlanticSalmon	BodyMap	Gill	Mature	Female	SAMEA9253105	SAMEA9253118	RNA-Seq	reverse	1	C1330402	ERR6664172	ERX6289104	PRJEB47409	ERP131682	86604c9c313c2421867d87f4dd7afd5e	29c21a9044568421cd0aee056654a731	63039878	SAMEA9253116	SAMEA9253201	ERR6664170	ERX6289172	PRJEB47409	ERP131682
AtlanticSalmon	BodyMap	Gonad	Mature	Female	SAMEA9253105	SAMEA9253119	RNA-Seq	reverse	1	C1330403	ERR6664173	ERX6289105	PRJEB47409	ERP131682	18294907962356653bd9351f89028fac	075c45a2de5144f3eaf8d04283bc327e	97251432	SAMEA9253105	SAMEA9253117	ERR6664171	ERX6289103	PRJEB47409	ERP131682
AtlanticSalmon	BodyMap	HeadKidney	Mature	Female	SAMEA9253105	SAMEA9253120	RNA-Seq	reverse	1	C1330404	ERR6664174	ERX6289106	PRJEB47409	ERP131682	252f6c6e4bbe4d64b0be5ff0d9369ccf	4923f131b2b16adc6bc0f1e85c44fe1e	77609650	SAMEA9253105	SAMEA9253118	ERR6664172	ERX6289104	PRJEB47409	ERP131682
AtlanticSalmon	BodyMap	Liver	Mature	Female	SAMEA9253105	SAMEA9253121	RNA-Seq	reverse	1	C1330405	ERR6664175	ERX6289107	PRJEB47409	ERP131682	6f29f8ba0a84cb7f8c64cb9d1791c1e3	713d3f3b9add1501292d06fd4f50e25d	60354754	SAMEA9253105	SAMEA9253119	ERR6664173	ERX6289105	PRJEB47409	ERP131682
AtlanticSalmon	BodyMap	Muscle	Mature	Female	SAMEA9253105	SAMEA9253122	RNA-Seq	reverse	1	C1330406	ERR6664176	ERX6289108	PRJEB47409	ERP131682	d772ab97b635d728d1a61ccd02b57945	6c8e552fa9a0b975dfc10e500df1ae11	63142734	SAMEA9253105	SAMEA9253120	ERR6664174	ERX6289106	PRJEB47409	ERP131682
AtlanticSalmon	BodyMap	SuppDistalIntestine	Mature	Female	SAMEA9253105	SAMEA9253123	RNA-Seq	reverse	1	C1330407	ERR6664177	ERX6289109	PRJEB47409	ERP131682	d1fcdf35191a8409679ed976a2f7bdf7	7a72a76c1abfb0b20f30831ecf52d3ce	62657736	SAMEA9253105	SAMEA9253121	ERR6664175	ERX6289107	PRJEB47409	ERP131682
AtlanticSalmon	BodyMap	Brain	Mature	Female	SAMEA9253106	SAMEA9253124	RNA-Seq	reverse	2	C1330501	ERR6664178	ERX6289110	PRJEB47409	ERP131682	7a53aa26817611eb67eb7c02bc28f7ac	98317582a958008172269bff1abc64fc	61580656	SAMEA9253105	SAMEA9253122	ERR6664176	ERX6289108	PRJEB47409	ERP131682
AtlanticSalmon	BodyMap	Gill	Mature	Female	SAMEA9253106	SAMEA9253125	RNA-Seq	reverse	2	C1330502	ERR6664179	ERX6289111	PRJEB47409	ERP131682	846ea1969bd23b01c609ecb646ea3302	3fc5aabd821b02f7d6208c9bd3e950a7	67097996	SAMEA9253105	SAMEA9253123	ERR6664177	ERX6289109	PRJEB47409	ERP131682
AtlanticSalmon	BodyMap	Gonad	Mature	Female	SAMEA9253106	SAMEA9253126	RNA-Seq	reverse	2	C1330503	ERR6664180	ERX6289112	PRJEB47409	ERP131682	c903b95d545a60d30f781fdbb652e09f	c7152910ab38425ed0fd904e209cb731	78955240	SAMEA9253106	SAMEA9253124	ERR6664178	ERX6289110	PRJEB47409	ERP131682
AtlanticSalmon	BodyMap	HeadKidney	Mature	Female	SAMEA9253106	SAMEA9253127	RNA-Seq	reverse	2	C1330504	ERR6664181	ERX6289113	PRJEB47409	ERP131682	dcfdcfa9cfdbe03112ad8ad2a6cbaf3a	12c087a68ad7910f6c96279911138ae9	62600964	SAMEA9253106	SAMEA9253125	ERR6664179	ERX6289111	PRJEB47409	ERP131682
AtlanticSalmon	BodyMap	Liver	Mature	Female	SAMEA9253106	SAMEA9253128	RNA-Seq	reverse	2	C1330505	ERR6664182	ERX6289114	PRJEB47409	ERP131682	91a326b353655772d1601030dfe21375	6e39c529d961285a8502b38a779c09de	60180480	SAMEA9253106	SAMEA9253126	ERR6664180	ERX6289112	PRJEB47409	ERP131682
AtlanticSalmon	BodyMap	Muscle	Mature	Female	SAMEA9253106	SAMEA9253129	RNA-Seq	reverse	2	C1330506	ERR6664183	ERX6289115	PRJEB47409	ERP131682	205df0327744de3fe2128d72829f7551	cc3d4fa59240685d3ec0f4d8f8bc429e	63147308	SAMEA9253106	SAMEA9253127	ERR6664181	ERX6289113	PRJEB47409	ERP131682
AtlanticSalmon	BodyMap	SuppDistalIntestine	Mature	Female	SAMEA9253106	SAMEA9253130	RNA-Seq	reverse	2	C1330507	ERR6664184	ERX6289116	PRJEB47409	ERP131682	338cc0ab0c40df332a36299ae1b65309	99b31bbc27c8ef78c2f48f2aa6353734	62734430	SAMEA9253106	SAMEA9253128	ERR6664182	ERX6289114	PRJEB47409	ERP131682
AtlanticSalmon	BodyMap	Brain	Mature	Female	SAMEA9253107	SAMEA9253131	RNA-Seq	reverse	3	C1330601	ERR6664185	ERX6289138	PRJEB47409	ERP131682	97352008126392bc59bee6056e943e0d	a7c34fcdb8ce5f62d8481a4ebbdb3a20	69467450	SAMEA9253106	SAMEA9253129	ERR6664183	ERX6289115	PRJEB47409	ERP131682
AtlanticSalmon	BodyMap	Gill	Mature	Female	SAMEA9253107	SAMEA9253132	RNA-Seq	reverse	3	C1330602	ERR6664186	ERX6289139	PRJEB47409	ERP131682	aee896593a6b8b6293f89e70aae1eb45	07e234dcf3f3aa55233c8947017d578a	62715626	SAMEA9253106	SAMEA9253130	ERR6664184	ERX6289116	PRJEB47409	ERP131682
AtlanticSalmon	BodyMap	Gonad	Mature	Female	SAMEA9253107	SAMEA9253133	RNA-Seq	reverse	3	C1330603	ERR6664187	ERX6289140	PRJEB47409	ERP131682	22ceee05a3ec322e776b162e0be54a0f	11144ea04267083308d449d8f987566a	65785184	SAMEA9253107	SAMEA9253131	ERR6664185	ERX6289138	PRJEB47409	ERP131682
AtlanticSalmon	BodyMap	HeadKidney	Mature	Female	SAMEA9253107	SAMEA9253134	RNA-Seq	reverse	3	C1330604	ERR6664188	ERX6289141	PRJEB47409	ERP131682	0078c514378ab5b9b5ffc2944a38c638	e7888a1234343f07f9174a9a15c44168	60333588	SAMEA9253107	SAMEA9253132	ERR6664186	ERX6289139	PRJEB47409	ERP131682
AtlanticSalmon	BodyMap	Liver	Mature	Female	SAMEA9253107	SAMEA9253135	RNA-Seq	reverse	3	C1330605	ERR6664189	ERX6289142	PRJEB47409	ERP131682	15d9ff3894643a9317ad505ae58935e2	c7b77a428a6dd4a246864afc7aeb59a0	60724664	SAMEA9253107	SAMEA9253133	ERR6664187	ERX6289140	PRJEB47409	ERP131682
AtlanticSalmon	BodyMap	Muscle	Mature	Female	SAMEA9253107	SAMEA9253136	RNA-Seq	reverse	3	C1330606	ERR6664190	ERX6289143	PRJEB47409	ERP131682	a01da22b538cadfd0f10dc44efa047ee	a8aa54ed2a0938be9e6ac4133e1230ef	59208364	SAMEA9253107	SAMEA9253134	ERR6664188	ERX6289141	PRJEB47409	ERP131682
AtlanticSalmon	BodyMap	SuppDistalIntestine	Mature	Female	SAMEA9253107	SAMEA9253137	RNA-Seq	reverse	3	C1330607	ERR6664191	ERX6289144	PRJEB47409	ERP131682	fec0aa181983aa0ca0f7fa0f7d83ab9d	fcdfa04e0cbda84b72052f6c4b1dcd6a	59880436	SAMEA9253107	SAMEA9253135	ERR6664189	ERX6289142	PRJEB47409	ERP131682
AtlanticSalmon	BodyMap	Brain	Mature	Male	SAMEA9253108	SAMEA9253138	RNA-Seq	reverse	1	C1340401	ERR6664192	ERX6289117	PRJEB47409	ERP131682	27e41a7df64a11753de7066a1a8e5491	d07923f261d5381c06589fb6b80b24de	72035044	SAMEA9253107	SAMEA9253136	ERR6664190	ERX6289143	PRJEB47409	ERP131682
AtlanticSalmon	BodyMap	Gill	Mature	Male	SAMEA9253108	SAMEA9253139	RNA-Seq	reverse	1	C1340402	ERR6664193	ERX6289118	PRJEB47409	ERP131682	2a95466581b5ce95bff09f24c602b29d	19dd0c4c68076e18281e9c0404b058f1	61458062	SAMEA9253107	SAMEA9253137	ERR6664191	ERX6289144	PRJEB47409	ERP131682
AtlanticSalmon	BodyMap	Gonad	Mature	Male	SAMEA9253108	SAMEA9253140	RNA-Seq	reverse	1	C1340403	ERR6664194	ERX6289119	PRJEB47409	ERP131682	0a83c2b165e378d565edc59e8e7b489d	684c722054651ec9b146f85372bef0cc	73146676	SAMEA9253108	SAMEA9253138	ERR6664192	ERX6289117	PRJEB47409	ERP131682
AtlanticSalmon	BodyMap	HeadKidney	Mature	Male	SAMEA9253108	SAMEA9253141	RNA-Seq	reverse	1	C1340404	ERR6664195	ERX6289120	PRJEB47409	ERP131682	b8315bc502d5107f2eb8d1ea4e163d3d	0f8abe133f3e83839e07951faf9e600a	63389530	SAMEA9253108	SAMEA9253139	ERR6664193	ERX6289118	PRJEB47409	ERP131682
AtlanticSalmon	BodyMap	Liver	Mature	Male	SAMEA9253108	SAMEA9253142	RNA-Seq	reverse	1	C1340405	ERR6664196	ERX6289121	PRJEB47409	ERP131682	06c36dc49c8866686f1bc42df22f18a8	0da64fd56db1844e7e15481228613857	60874214	SAMEA9253108	SAMEA9253140	ERR6664194	ERX6289119	PRJEB47409	ERP131682
AtlanticSalmon	BodyMap	Muscle	Mature	Male	SAMEA9253108	SAMEA9253143	RNA-Seq	reverse	1	C1340406	ERR6664197	ERX6289122	PRJEB47409	ERP131682	6851a7a3eece8ddc2c9176fe1671722c	4ce9ac42259100252aab5d851b963d66	69586704	SAMEA9253108	SAMEA9253141	ERR6664195	ERX6289120	PRJEB47409	ERP131682
AtlanticSalmon	BodyMap	SuppDistalIntestine	Mature	Male	SAMEA9253108	SAMEA9253144	RNA-Seq	reverse	1	C1340407	ERR6664198	ERX6289123	PRJEB47409	ERP131682	b6969d771c423a194a26cfb35237cc46	7e1e193a286a8532ff02c06fdd911e2b	62112466	SAMEA9253108	SAMEA9253142	ERR6664196	ERX6289121	PRJEB47409	ERP131682
AtlanticSalmon	BodyMap	Brain	Mature	Male	SAMEA9253109	SAMEA9253145	RNA-Seq	reverse	2	C1340501	ERR6664199	ERX6289124	PRJEB47409	ERP131682	473dfa0e17bcf28278425c49fec4e87a	71120885215b4f598788c0d1a7088434	61833544	SAMEA9253108	SAMEA9253143	ERR6664197	ERX6289122	PRJEB47409	ERP131682
AtlanticSalmon	BodyMap	Gill	Mature	Male	SAMEA9253109	SAMEA9253146	RNA-Seq	reverse	2	C1340502	ERR6664200	ERX6289125	PRJEB47409	ERP131682	1d9d4eb7f3d48e1388236d4781dbf207	681a81a1581677089d703fac517ba549	61567336	SAMEA9253108	SAMEA9253144	ERR6664198	ERX6289123	PRJEB47409	ERP131682
AtlanticSalmon	BodyMap	Gonad	Mature	Male	SAMEA9253109	SAMEA9253147	RNA-Seq	reverse	2	C1340503	ERR6664201	ERX6289126	PRJEB47409	ERP131682	7834fa332dc4cefb1823a0e2709190da	b43023c2de7a469bb05fdf7ad879b2f2	62610364	SAMEA9253109	SAMEA9253145	ERR6664199	ERX6289124	PRJEB47409	ERP131682
AtlanticSalmon	BodyMap	HeadKidney	Mature	Male	SAMEA9253109	SAMEA9253148	RNA-Seq	reverse	2	C1340504	ERR6664202	ERX6289127	PRJEB47409	ERP131682	3629a1a067ba6edfae863128e633c920	eb977b26d75ae580161be1ee980b9e3a	68091366	SAMEA9253109	SAMEA9253146	ERR6664200	ERX6289125	PRJEB47409	ERP131682
AtlanticSalmon	BodyMap	Liver	Mature	Male	SAMEA9253109	SAMEA9253149	RNA-Seq	reverse	2	C1340505	ERR6664203	ERX6289128	PRJEB47409	ERP131682	0f027367d6080607f475f6453b968dc6	dd05d96d90510b9601fd0102414c1cde	62764856	SAMEA9253109	SAMEA9253147	ERR6664201	ERX6289126	PRJEB47409	ERP131682
AtlanticSalmon	BodyMap	Muscle	Mature	Male	SAMEA9253109	SAMEA9253150	RNA-Seq	reverse	2	C1340506	ERR6664204	ERX6289129	PRJEB47409	ERP131682	ea45289b6633180e99745471a1dfff9c	4bc3cd341994dda6c0a914f0aeb8130a	63043348	SAMEA9253109	SAMEA9253148	ERR6664202	ERX6289127	PRJEB47409	ERP131682
AtlanticSalmon	BodyMap	SuppDistalIntestine	Mature	Male	SAMEA9253109	SAMEA9253151	RNA-Seq	reverse	2	C1340507	ERR6664205	ERX6289130	PRJEB47409	ERP131682	f132230da61dec37ac914586df54026d	8259a48599b3389deee59165afa57de2	63934164	SAMEA9253109	SAMEA9253149	ERR6664203	ERX6289128	PRJEB47409	ERP131682
AtlanticSalmon	BodyMap	Brain	Mature	Male	SAMEA9253110	SAMEA9253152	RNA-Seq	reverse	3	C1340601	ERR6664206	ERX6289131	PRJEB47409	ERP131682	d421db340dc1201398fc8c400f174da8	c527f437811d9c9984d1cee06f6408b4	57676844	SAMEA9253109	SAMEA9253150	ERR6664204	ERX6289129	PRJEB47409	ERP131682
AtlanticSalmon	BodyMap	Gill	Mature	Male	SAMEA9253110	SAMEA9253153	RNA-Seq	reverse	3	C1340602	ERR6664207	ERX6289132	PRJEB47409	ERP131682	8eae5faa3cf5480110b1bba4b086fc8f	35fd6f8b271bf43febeaa10a5da658a2	60467844	SAMEA9253109	SAMEA9253151	ERR6664205	ERX6289130	PRJEB47409	ERP131682
AtlanticSalmon	BodyMap	Gonad	Mature	Male	SAMEA9253110	SAMEA9253154	RNA-Seq	reverse	3	C1340603	ERR6664208	ERX6289133	PRJEB47409	ERP131682	d05228700967cf2e8b378a5df18e060e	27b37118e50ff41a8f1c96b7050dba7e	60194962	SAMEA9253110	SAMEA9253152	ERR6664206	ERX6289131	PRJEB47409	ERP131682
AtlanticSalmon	BodyMap	HeadKidney	Mature	Male	SAMEA9253110	SAMEA9253155	RNA-Seq	reverse	3	C1340604	ERR6664209	ERX6289134	PRJEB47409	ERP131682	8ea830e3f694f019fdcfeaea85cff4d8	e21bab3c4e4d8819e4698d3ab9cba85c	60404868	SAMEA9253110	SAMEA9253153	ERR6664207	ERX6289132	PRJEB47409	ERP131682
AtlanticSalmon	BodyMap	Liver	Mature	Male	SAMEA9253110	SAMEA9253156	RNA-Seq	reverse	3	C1340605	ERR6664210	ERX6289135	PRJEB47409	ERP131682	eae4540b8204b5224dfad3a122ab7734	d3f49d2c567f14b96aa11eab54df9a02	62210512	SAMEA9253110	SAMEA9253154	ERR6664208	ERX6289133	PRJEB47409	ERP131682
AtlanticSalmon	BodyMap	Muscle	Mature	Male	SAMEA9253110	SAMEA9253157	RNA-Seq	reverse	3	C1340606	ERR6664211	ERX6289136	PRJEB47409	ERP131682	4f62a7c91762493d555ca3a224fdef7a	40c36c65cba1ec4bfce5f8e9447155de	62995532	SAMEA9253110	SAMEA9253155	ERR6664209	ERX6289134	PRJEB47409	ERP131682
AtlanticSalmon	BodyMap	SuppDistalIntestine	Mature	Male	SAMEA9253110	SAMEA9253158	RNA-Seq	reverse	3	C1340607	ERR6664212	ERX6289137	PRJEB47409	ERP131682	ebbba5bee2cf50939c3c5d97b701766a	700fb37f3ccb27425cf80f6ad0ff400a	62404030	SAMEA9253110	SAMEA9253156	ERR6664210	ERX6289135	PRJEB47409	ERP131682
RainbowTrout	DevMap	Late Blastulation	n.a.	n.a.	SAMEA9835684	SAMEA9835800	ATAC-Seq	n.a.	1	D3100101	ERR9360840	ERX8902773	PRJEB51856	ERP136506	4398531154db02a3c27ddfbb141b9890	30f331700789384d427e81cb9ed4b8ce	75777340	SAMEA9253110	SAMEA9253157	ERR6664211	ERX6289136	PRJEB47409	ERP131682
RainbowTrout	DevMap	Late Blastulation	n.a.	n.a.	SAMEA9835684	SAMEA9835806	ATAC-Seq	n.a.	2	D3100102	ERR9360841	ERX8902774	PRJEB51856	ERP136506	99bbc06a14382c4883a8038bbd77b51c	01b1e78f2cecf7a58b7cec7977ab2124	64305354	SAMEA9253110	SAMEA9253158	ERR6664212	ERX6289137	PRJEB47409	ERP131682
RainbowTrout	DevMap	Late Blastulation	n.a.	n.a.	SAMEA9835684	SAMEA9835812	ATAC-Seq	n.a.	3	D3100103	ERR9360842	ERX8902775	PRJEB51856	ERP136506	c99c52879a8535f399070a140abf111a	bae4008d5f3d257be4b81f328d4bde11	58083688	SAMEA9835684	SAMEA9835800	ERR9360840	ERX8902773	PRJEB51856	ERP136506
RainbowTrout	DevMap	Mid Gastrulation	n.a.	n.a.	SAMEA9835686	SAMEA9835801	ATAC-Seq	n.a.	1	D3100201	ERR9360843	ERX8902776	PRJEB51856	ERP136506	58e5874bacf4cf501fcba844d270ff94	d4e4b35941373525bd073c88b98f3da0	83148358	SAMEA9835684	SAMEA9835806	ERR9360841	ERX8902774	PRJEB51856	ERP136506
RainbowTrout	DevMap	Mid Gastrulation	n.a.	n.a.	SAMEA9835686	SAMEA9835807	ATAC-Seq	n.a.	2	D3100202	ERR9360844	ERX8902777	PRJEB51856	ERP136506	3c24774ae83e0162f5543af168c0ad01	1057ef126e39e3d3bb00dba987fe42c3	83083274	SAMEA9835684	SAMEA9835812	ERR9360842	ERX8902775	PRJEB51856	ERP136506
RainbowTrout	DevMap	Mid Gastrulation	n.a.	n.a.	SAMEA9835686	SAMEA9835813	ATAC-Seq	n.a.	3	D3100203	ERR9360845	ERX8902778	PRJEB51856	ERP136506	92dc99a7f0d6003812f383eb1304927b	d9d87a722ecc2798218a7092c6c7b0dc	67196188	SAMEA9835686	SAMEA9835801	ERR9360843	ERX8902776	PRJEB51856	ERP136506
RainbowTrout	DevMap	Early Somitogenesis	n.a.	n.a.	SAMEA9835688	SAMEA9835802	ATAC-Seq	n.a.	1	D3100301	ERR9360846	ERX8902779	PRJEB51856	ERP136506	9e234da7febca1574e51a78a6b6b6550	00cb35f09337f345dde62604391cb70b	78032518	SAMEA9835686	SAMEA9835807	ERR9360844	ERX8902777	PRJEB51856	ERP136506
RainbowTrout	DevMap	Early Somitogenesis	n.a.	n.a.	SAMEA9835688	SAMEA9835808	ATAC-Seq	n.a.	2	D3100302	ERR9360847	ERX8902780	PRJEB51856	ERP136506	4beda4ae1473d07e91d48e38aeab1755	4190ccc8c1a4b0d2c6d6770b7a802f25	58213830	SAMEA9835686	SAMEA9835813	ERR9360845	ERX8902778	PRJEB51856	ERP136506
RainbowTrout	DevMap	Early Somitogenesis	n.a.	n.a.	SAMEA9835688	SAMEA9835814	ATAC-Seq	n.a.	3	D3100303	ERR9360848	ERX8902781	PRJEB51856	ERP136506	5bb6fc766136a1dd146475335da722b7	a39d17db81b79b9df7340df03f27fe1e	66554084	SAMEA9835688	SAMEA9835802	ERR9360846	ERX8902779	PRJEB51856	ERP136506
RainbowTrout	DevMap	Mid Somitogenesis	n.a.	n.a.	SAMEA9835690	SAMEA9835803	ATAC-Seq	n.a.	1	D3100401	ERR9360849	ERX8902782	PRJEB51856	ERP136506	247c2d503373fdbd02dcec83cd6adfa8	c8da56ec6393ef2c42d027ef5d6f5954	79260904	SAMEA9835688	SAMEA9835808	ERR9360847	ERX8902780	PRJEB51856	ERP136506
RainbowTrout	DevMap	Mid Somitogenesis	n.a.	n.a.	SAMEA9835690	SAMEA9835809	ATAC-Seq	n.a.	2	D3100402	ERR9360850	ERX8902783	PRJEB51856	ERP136506	f48157bce73ff256a567a2abecae62ee	84466d3fb27fb645c619ad02d3a48d35	72158662	SAMEA9835688	SAMEA9835814	ERR9360848	ERX8902781	PRJEB51856	ERP136506
RainbowTrout	DevMap	Mid Somitogenesis	n.a.	n.a.	SAMEA9835690	SAMEA9835815	ATAC-Seq	n.a.	3	D3100403	ERR9360851	ERX8902789	PRJEB51856	ERP136506	f8a825f76a488c70b3f2ed562d2661da	71fbbf440d3a8188ef3d8feabdf04173	41248614	SAMEA9835690	SAMEA9835803	ERR9360849	ERX8902782	PRJEB51856	ERP136506
RainbowTrout	DevMap	LateSomitogenesis	n.a.	n.a.	SAMEA9835692	SAMEA9835804	ATAC-Seq	n.a.	1	D3100501	ERR9360852	ERX8902784	PRJEB51856	ERP136506	b0f0dd59acedf465345c4613c9f4c22a	bb9faa38e9d5121189b6de855cafe787	115052968	SAMEA9835690	SAMEA9835809	ERR9360850	ERX8902783	PRJEB51856	ERP136506
RainbowTrout	DevMap	LateSomitogenesis	n.a.	n.a.	SAMEA9835692	SAMEA9835810	ATAC-Seq	n.a.	2	D3100502	ERR9360853	ERX8902788	PRJEB51856	ERP136506	461837a70238004dfd6cf6a3a14ad214	ed8e15b2bc926a030d168add8a9d87cc	41008256	SAMEA9835690	SAMEA9835815	ERR9360851	ERX8902789	PRJEB51856	ERP136506
RainbowTrout	DevMap	Late Blastulation	n.a.	n.a.	SAMEA110410386	SAMEA110410406	ChIP-Seq	H3K27ac	1	D3200121	ERR9992522	ERX9534321	PRJEB55010	ERP139878	a1d34cbf6169fde3e61e7a883e91010b	5488c83720d0fafb94bda541afb29964	108407696	SAMEA9835692	SAMEA9835804	ERR9360852	ERX8902784	PRJEB51856	ERP136506
RainbowTrout	DevMap	Late Blastulation	n.a.	n.a.	SAMEA110410386	SAMEA110410477	ChIP-Seq	H3K27ac	2	D3200122	ERR9992523	ERX9534322	PRJEB55010	ERP139878	ee5178194a9f3ecad349f5ff060cb5b5	5b10a245f199dde5f02890da4cce8109	98465250	SAMEA9835692	SAMEA9835810	ERR9360853	ERX8902788	PRJEB51856	ERP136506
RainbowTrout	DevMap	Late Blastulation	n.a.	n.a.	SAMEA110410386	SAMEA110410483	ChIP-Seq	H3K27ac	3	D3200123	ERR9992524	ERX9534323	PRJEB55010	ERP139878	4be1adefdcca650ba34f988aa9961ac2	d90371f2b73e32ac4861a0f9669d03d0	95697842	SAMEA110410386	SAMEA110410406	ERR9992522	ERX9534321	PRJEB55010	ERP139878
RainbowTrout	DevMap	Late Blastulation	n.a.	n.a.	SAMEA110410386	SAMEA110410406	ChIP-Seq	H3K27me3	1	D3200131	ERR9992525	ERX9534324	PRJEB55010	ERP139878	d0a78c0b32fbb0dfaeb73c569f4af8cc	8d47bc67502ec8bf7adb2b2b15a537a7	108850250	SAMEA110410386	SAMEA110410477	ERR9992523	ERX9534322	PRJEB55010	ERP139878
RainbowTrout	DevMap	Late Blastulation	n.a.	n.a.	SAMEA110410386	SAMEA110410477	ChIP-Seq	H3K27me3	2	D3200132	ERR9992526	ERX9534325	PRJEB55010	ERP139878	2363d9f021acf1add46ba65e20a1cc80	b3e181a1e5fb62db7ebe5ebbd757f229	109380230	SAMEA110410386	SAMEA110410483	ERR9992524	ERX9534323	PRJEB55010	ERP139878
RainbowTrout	DevMap	Late Blastulation	n.a.	n.a.	SAMEA110410386	SAMEA110410483	ChIP-Seq	H3K27me3	3	D3200133	ERR9992527	ERX9534326	PRJEB55010	ERP139878	972446d652f7a89a14e9bd25685297da	f70a4462ef265efdfea39437f3ac97a2	97531480	SAMEA110410386	SAMEA110410406	ERR9992525	ERX9534324	PRJEB55010	ERP139878
RainbowTrout	DevMap	Late Blastulation	n.a.	n.a.	SAMEA110410386	SAMEA110410406	ChIP-Seq	H3K4me1	1	D3200141	ERR9992528	ERX9534327	PRJEB55010	ERP139878	4e2c62d11fab2c5176afddd984941223	4b46261060fbeba80c4e8b7b26b3cb05	122077146	SAMEA110410386	SAMEA110410477	ERR9992526	ERX9534325	PRJEB55010	ERP139878
RainbowTrout	DevMap	Late Blastulation	n.a.	n.a.	SAMEA110410386	SAMEA110410477	ChIP-Seq	H3K4me1	2	D3200142	ERR9992529	ERX9534328	PRJEB55010	ERP139878	25bb50955452a5ffa3f827937393d33a	6a86b2b33445a13bbd9aa92d08aafa05	102996736	SAMEA110410386	SAMEA110410483	ERR9992527	ERX9534326	PRJEB55010	ERP139878
RainbowTrout	DevMap	Late Blastulation	n.a.	n.a.	SAMEA110410386	SAMEA110410483	ChIP-Seq	H3K4me1	3	D3200143	ERR9992530	ERX9534329	PRJEB55010	ERP139878	6fd1f48aa8717ef70f42eb550491f789	28c765ca002a1aee00fc9b7120818b58	166306888	SAMEA110410386	SAMEA110410406	ERR9992528	ERX9534327	PRJEB55010	ERP139878
RainbowTrout	DevMap	Late Blastulation	n.a.	n.a.	SAMEA110410386	SAMEA110410406	ChIP-Seq	H3K4me3	1	D3200151	ERR9992531	ERX9534330	PRJEB55010	ERP139878	6ba853dff429f65f2b3a5e89f8f95389	b93dd06996fb4fbf2d6acd3be8700a94	113982778	SAMEA110410386	SAMEA110410477	ERR9992529	ERX9534328	PRJEB55010	ERP139878
RainbowTrout	DevMap	Late Blastulation	n.a.	n.a.	SAMEA110410386	SAMEA110410477	ChIP-Seq	H3K4me3	2	D3200152	ERR9992532	ERX9534331	PRJEB55010	ERP139878	cdfe518019b8e35203ea7c0398d7c56c	e09830b18610e81e60143a261fda76ce	101287002	SAMEA110410386	SAMEA110410483	ERR9992530	ERX9534329	PRJEB55010	ERP139878
RainbowTrout	DevMap	Late Blastulation	n.a.	n.a.	SAMEA110410386	SAMEA110410483	ChIP-Seq	H3K4me3	3	D3200153	ERR9992533	ERX9534332	PRJEB55010	ERP139878	6d649300d5adb4577432390e0bda2189	b84b809ee3d35a5229ff6b7f4096cb7f	93159644	SAMEA110410386	SAMEA110410406	ERR9992531	ERX9534330	PRJEB55010	ERP139878
RainbowTrout	DevMap	Late Blastulation	n.a.	n.a.	SAMEA110410386	SAMEA110410406	ChIP-Seq	Input	1	D3200162	ERR9992534	ERX9534333	PRJEB55010	ERP139878	4ce53f3d70708a1a1acc7453533babcb	6c60dcb2627794c33e4b5633cf8c7bf1	210430368	SAMEA110410386	SAMEA110410477	ERR9992532	ERX9534331	PRJEB55010	ERP139878
RainbowTrout	DevMap	Mid Gastrulation	n.a.	n.a.	SAMEA110410387	SAMEA110410438	ChIP-Seq	H3K27ac	1	D3200221	ERR9992535	ERX9534334	PRJEB55010	ERP139878	5c3379b10530a51407511187d68f1c24	91d8a694b91a00a50a598a04b9eff189	96103930	SAMEA110410386	SAMEA110410483	ERR9992533	ERX9534332	PRJEB55010	ERP139878
RainbowTrout	DevMap	Mid Gastrulation	n.a.	n.a.	SAMEA110410387	SAMEA110410478	ChIP-Seq	H3K27ac	2	D3200222	ERR9992536	ERX9534335	PRJEB55010	ERP139878	2d982d3c4fa73db3ee6c0dffdc5da61e	005b34c0f8e2a2625eeeab25fe383572	96416582	SAMEA110410386	SAMEA110410406	ERR9992534	ERX9534333	PRJEB55010	ERP139878
RainbowTrout	DevMap	Mid Gastrulation	n.a.	n.a.	SAMEA110410387	SAMEA110410484	ChIP-Seq	H3K27ac	3	D3200223	ERR9992537	ERX9534336	PRJEB55010	ERP139878	c3d8e768a1cae60d5cecd0b7899a7faf	0829b08c82e882316607b6ce1b396d52	93134904	SAMEA110410387	SAMEA110410438	ERR9992535	ERX9534334	PRJEB55010	ERP139878
RainbowTrout	DevMap	Mid Gastrulation	n.a.	n.a.	SAMEA110410387	SAMEA110410438	ChIP-Seq	H3K27me3	1	D3200231	ERR9992538	ERX9534337	PRJEB55010	ERP139878	90fafbe4f5aad5a9db7d29a5ee8301bd	76932c475a867a91231f1e5ba2369409	94273994	SAMEA110410387	SAMEA110410478	ERR9992536	ERX9534335	PRJEB55010	ERP139878
RainbowTrout	DevMap	Mid Gastrulation	n.a.	n.a.	SAMEA110410387	SAMEA110410478	ChIP-Seq	H3K27me3	2	D3200232	ERR9992539	ERX9534338	PRJEB55010	ERP139878	e67bf33c405269c8d008e15b10fd32a1	f7f4b6374ebd2bae298bbf2941ae916b	94632792	SAMEA110410387	SAMEA110410484	ERR9992537	ERX9534336	PRJEB55010	ERP139878
RainbowTrout	DevMap	Mid Gastrulation	n.a.	n.a.	SAMEA110410387	SAMEA110410484	ChIP-Seq	H3K27me3	3	D3200233	ERR9992540	ERX9534339	PRJEB55010	ERP139878	ea48fb59d7b5fbad6d99fbb14335d4cc	c57c1720ffa22997612e094710c22628	90665772	SAMEA110410387	SAMEA110410438	ERR9992538	ERX9534337	PRJEB55010	ERP139878
RainbowTrout	DevMap	Mid Gastrulation	n.a.	n.a.	SAMEA110410387	SAMEA110410438	ChIP-Seq	H3K4me1	1	D3200241	ERR9992541	ERX9534340	PRJEB55010	ERP139878	431df36d7b89b71a099a7ee38dfdb97d	6bf1c84877816427c41656aceda6683e	102993530	SAMEA110410387	SAMEA110410478	ERR9992539	ERX9534338	PRJEB55010	ERP139878
RainbowTrout	DevMap	Mid Gastrulation	n.a.	n.a.	SAMEA110410387	SAMEA110410478	ChIP-Seq	H3K4me1	2	D3200242	ERR9992542	ERX9534341	PRJEB55010	ERP139878	74f5b60ffbf8ca499f6f1e924efd5271	becc8047fec533d1c36300c2808b3b08	124085954	SAMEA110410387	SAMEA110410484	ERR9992540	ERX9534339	PRJEB55010	ERP139878
RainbowTrout	DevMap	Mid Gastrulation	n.a.	n.a.	SAMEA110410387	SAMEA110410484	ChIP-Seq	H3K4me1	3	D3200243	ERR9992543	ERX9534342	PRJEB55010	ERP139878	7b0bd3a85b5120c7522432380d9d3c68	6c89161c7fff0f7131ddf0796fc9e1d7	111660628	SAMEA110410387	SAMEA110410438	ERR9992541	ERX9534340	PRJEB55010	ERP139878
RainbowTrout	DevMap	Mid Gastrulation	n.a.	n.a.	SAMEA110410387	SAMEA110410438	ChIP-Seq	H3K4me3	1	D3200251	ERR9992544	ERX9534343	PRJEB55010	ERP139878	5a66e391e68ab1bcacc6515106d57b9d	21f4b81d9c143a61488e567eb9dffa72	95996122	SAMEA110410387	SAMEA110410478	ERR9992542	ERX9534341	PRJEB55010	ERP139878
RainbowTrout	DevMap	Mid Gastrulation	n.a.	n.a.	SAMEA110410387	SAMEA110410478	ChIP-Seq	H3K4me3	2	D3200252	ERR9992545	ERX9534344	PRJEB55010	ERP139878	55be8b573e202721b2f1427b94fb7b89	aef41be5ea6581fb0820721956751175	102715882	SAMEA110410387	SAMEA110410484	ERR9992543	ERX9534342	PRJEB55010	ERP139878
RainbowTrout	DevMap	Mid Gastrulation	n.a.	n.a.	SAMEA110410387	SAMEA110410484	ChIP-Seq	H3K4me3	3	D3200253	ERR9992546	ERX9534345	PRJEB55010	ERP139878	e9cc88959d9cfbbb9ced753deb41ebe3	0913fc9c443d4d98b0fd0162342063b5	97377732	SAMEA110410387	SAMEA110410438	ERR9992544	ERX9534343	PRJEB55010	ERP139878
RainbowTrout	DevMap	Mid Gastrulation	n.a.	n.a.	SAMEA110410387	SAMEA110410438	ChIP-Seq	Input	1	D3200262	ERR9992547	ERX9534346	PRJEB55010	ERP139878	2d29a145923e156c456443bd58f9212f	0f35a77f8eb6e39d06304a0db077692f	189085934	SAMEA110410387	SAMEA110410478	ERR9992545	ERX9534344	PRJEB55010	ERP139878
RainbowTrout	DevMap	Early Somitogenesis	n.a.	n.a.	SAMEA110410388	SAMEA110410473	ChIP-Seq	H3K27ac	1	D3200321	ERR9992548	ERX9534347	PRJEB55010	ERP139878	5dfd5e542799416acfd00be2bc0bb96e	e4b0511eb5f0264cae4d067ad2a84ba2	223244938	SAMEA110410387	SAMEA110410484	ERR9992546	ERX9534345	PRJEB55010	ERP139878
RainbowTrout	DevMap	Early Somitogenesis	n.a.	n.a.	SAMEA110410388	SAMEA110410479	ChIP-Seq	H3K27ac	2	D3200322	ERR9992549	ERX9534348	PRJEB55010	ERP139878	ea78cf77e7ec1ec8d9c3b9fcd0b185bd	2d49e755c0bb01d3f44d5e56c3e1ad91	102326496	SAMEA110410387	SAMEA110410438	ERR9992547	ERX9534346	PRJEB55010	ERP139878
RainbowTrout	DevMap	Early Somitogenesis	n.a.	n.a.	SAMEA110410388	SAMEA110410485	ChIP-Seq	H3K27ac	3	D3200323	ERR9992550	ERX9534349	PRJEB55010	ERP139878	45bb0b71d86635a3d3c61f8d853df996	eb1f3c07adfaef18100f0130d2a00507	108542786	SAMEA110410388	SAMEA110410473	ERR9992548	ERX9534347	PRJEB55010	ERP139878
RainbowTrout	DevMap	Early Somitogenesis	n.a.	n.a.	SAMEA110410388	SAMEA110410473	ChIP-Seq	H3K27me3	1	D3200331	ERR9992551	ERX9534350	PRJEB55010	ERP139878	a6568c23b7c69bca863bfc9eed487c8c	c98181466de99e4bae32ff8b80eaef89	109287100	SAMEA110410388	SAMEA110410479	ERR9992549	ERX9534348	PRJEB55010	ERP139878
RainbowTrout	DevMap	Early Somitogenesis	n.a.	n.a.	SAMEA110410388	SAMEA110410479	ChIP-Seq	H3K27me3	2	D3200332	ERR9992552	ERX9534351	PRJEB55010	ERP139878	959a2ef2da2e307753cc04545f3a6e23	24bc9524091e874dfbed765db6f40d78	144979174	SAMEA110410388	SAMEA110410485	ERR9992550	ERX9534349	PRJEB55010	ERP139878
RainbowTrout	DevMap	Early Somitogenesis	n.a.	n.a.	SAMEA110410388	SAMEA110410485	ChIP-Seq	H3K27me3	3	D3200333	ERR9992553	ERX9534352	PRJEB55010	ERP139878	59324983171c9ed84f06a4c30c2b5f20	a25d8ace70a0a76c97da3521d820d188	106181472	SAMEA110410388	SAMEA110410473	ERR9992551	ERX9534350	PRJEB55010	ERP139878
RainbowTrout	DevMap	Early Somitogenesis	n.a.	n.a.	SAMEA110410388	SAMEA110410473	ChIP-Seq	H3K4me1	1	D3200341	ERR9992554	ERX9534353	PRJEB55010	ERP139878	c805d87accd59f95887cfe2f8853e3f0	2ff42d0d5faf4b5d9d7c29ea8a928981	138293034	SAMEA110410388	SAMEA110410479	ERR9992552	ERX9534351	PRJEB55010	ERP139878
RainbowTrout	DevMap	Early Somitogenesis	n.a.	n.a.	SAMEA110410388	SAMEA110410479	ChIP-Seq	H3K4me1	2	D3200342	ERR9992555	ERX9534354	PRJEB55010	ERP139878	ff29a18d5726e1ea5ef2dd3913a2effc	966ca5ff873791a5ac67b8b6ca1f4ced	106821824	SAMEA110410388	SAMEA110410485	ERR9992553	ERX9534352	PRJEB55010	ERP139878
RainbowTrout	DevMap	Early Somitogenesis	n.a.	n.a.	SAMEA110410388	SAMEA110410485	ChIP-Seq	H3K4me1	3	D3200343	ERR9992556	ERX9534355	PRJEB55010	ERP139878	a9c4937d41112bcc28d4fa5372a44ce0	aeeb2d59e4073f761750b228fdb3476e	70044772	SAMEA110410388	SAMEA110410473	ERR9992554	ERX9534353	PRJEB55010	ERP139878
RainbowTrout	DevMap	Early Somitogenesis	n.a.	n.a.	SAMEA110410388	SAMEA110410473	ChIP-Seq	H3K4me3	1	D3200351	ERR9992557	ERX9534356	PRJEB55010	ERP139878	10105876b05449eaa2ed07f6bfc02ae7	a2850807c0c63de083434b8e9b2eef9b	300722826	SAMEA110410388	SAMEA110410479	ERR9992555	ERX9534354	PRJEB55010	ERP139878
RainbowTrout	DevMap	Early Somitogenesis	n.a.	n.a.	SAMEA110410388	SAMEA110410479	ChIP-Seq	H3K4me3	2	D3200352	ERR9992558	ERX9534357	PRJEB55010	ERP139878	312a6c8138cf6341b2a740a82913c517	95c69eaedac38fd40305def4eb566081	206563992	SAMEA110410388	SAMEA110410485	ERR9992556	ERX9534355	PRJEB55010	ERP139878
RainbowTrout	DevMap	Early Somitogenesis	n.a.	n.a.	SAMEA110410388	SAMEA110410485	ChIP-Seq	H3K4me3	3	D3200353	ERR9992559	ERX9534358	PRJEB55010	ERP139878	9b9226bfdafa29bfb3f78b6cef5866f6	a0eab1a2a80a6183aad51076f750d151	209835962	SAMEA110410388	SAMEA110410473	ERR9992557	ERX9534356	PRJEB55010	ERP139878
RainbowTrout	DevMap	Early Somitogenesis	n.a.	n.a.	SAMEA110410388	SAMEA110410473	ChIP-Seq	Input	1	D3200362	ERR9992560	ERX9534359	PRJEB55010	ERP139878	8d3be5622e1adb6ee9331edc29f34ee4	7452cf332b4c3e7812e26d0159c16068	200939606	SAMEA110410388	SAMEA110410479	ERR9992558	ERX9534357	PRJEB55010	ERP139878
RainbowTrout	DevMap	Mid Somitogenesis	n.a.	n.a.	SAMEA110410389	SAMEA110410474	ChIP-Seq	H3K27ac	1	D3200421	ERR9992561	ERX9534360	PRJEB55010	ERP139878	a3b099182b816f42f76fda65c0b36228	a7aa8c1bff17abbc1715e571e98ca9e1	135059766	SAMEA110410388	SAMEA110410485	ERR9992559	ERX9534358	PRJEB55010	ERP139878
RainbowTrout	DevMap	Mid Somitogenesis	n.a.	n.a.	SAMEA110410389	SAMEA110410480	ChIP-Seq	H3K27ac	2	D3200422	ERR9992562	ERX9534361	PRJEB55010	ERP139878	8a94ca33125855fd7b509a34cc73bebf	9329401ca72609c4c2dabba6d1016c4d	117887994	SAMEA110410388	SAMEA110410473	ERR9992560	ERX9534359	PRJEB55010	ERP139878
RainbowTrout	DevMap	Mid Somitogenesis	n.a.	n.a.	SAMEA110410389	SAMEA110410486	ChIP-Seq	H3K27ac	3	D3200423	ERR9992563	ERX9534362	PRJEB55010	ERP139878	ed24ead352e3ea7885a66b59449be742	50d35e4012c83a9beb1c7d662e2b7a70	136999058	SAMEA110410389	SAMEA110410474	ERR9992561	ERX9534360	PRJEB55010	ERP139878
RainbowTrout	DevMap	Mid Somitogenesis	n.a.	n.a.	SAMEA110410389	SAMEA110410474	ChIP-Seq	H3K27me3	1	D3200431	ERR9992564	ERX9534363	PRJEB55010	ERP139878	2ea6368993f461ec1f98bf00651baca9	27f373803e280ae79fb1409a43fe7799	94722288	SAMEA110410389	SAMEA110410480	ERR9992562	ERX9534361	PRJEB55010	ERP139878
RainbowTrout	DevMap	Mid Somitogenesis	n.a.	n.a.	SAMEA110410389	SAMEA110410480	ChIP-Seq	H3K27me3	2	D3200432	ERR9992565	ERX9534364	PRJEB55010	ERP139878	c2c6b8d9ac0a7b8d8582b5690c9b082e	cb638a613664af7a3aebab23c5ec26e2	100451754	SAMEA110410389	SAMEA110410486	ERR9992563	ERX9534362	PRJEB55010	ERP139878
RainbowTrout	DevMap	Mid Somitogenesis	n.a.	n.a.	SAMEA110410389	SAMEA110410486	ChIP-Seq	H3K27me3	3	D3200433	ERR9992566	ERX9534365	PRJEB55010	ERP139878	e4df281f8e80c70349b38bd281294ac1	2e3359797e10499615e6d54b6a332310	95548206	SAMEA110410389	SAMEA110410474	ERR9992564	ERX9534363	PRJEB55010	ERP139878
RainbowTrout	DevMap	Mid Somitogenesis	n.a.	n.a.	SAMEA110410389	SAMEA110410474	ChIP-Seq	H3K4me1	1	D3200441	ERR9992567	ERX9534366	PRJEB55010	ERP139878	99d5661480caa91791ad6feb71cb305c	822f50eb6cb65363230b8df6063c2259	115045860	SAMEA110410389	SAMEA110410480	ERR9992565	ERX9534364	PRJEB55010	ERP139878
RainbowTrout	DevMap	Mid Somitogenesis	n.a.	n.a.	SAMEA110410389	SAMEA110410480	ChIP-Seq	H3K4me1	2	D3200442	ERR9992568	ERX9534367	PRJEB55010	ERP139878	9e5832d831af1cfaa500de94ac5a174a	3de0ea060ccac82b929148af65989bd8	120611300	SAMEA110410389	SAMEA110410486	ERR9992566	ERX9534365	PRJEB55010	ERP139878
RainbowTrout	DevMap	Mid Somitogenesis	n.a.	n.a.	SAMEA110410389	SAMEA110410486	ChIP-Seq	H3K4me1	3	D3200443	ERR9992569	ERX9534368	PRJEB55010	ERP139878	ddd5260c0be8d65cab2b3fbe0eadbdfd	d48297c2a6ff8cc33f84806561e6d243	102624040	SAMEA110410389	SAMEA110410474	ERR9992567	ERX9534366	PRJEB55010	ERP139878
RainbowTrout	DevMap	Mid Somitogenesis	n.a.	n.a.	SAMEA110410389	SAMEA110410474	ChIP-Seq	H3K4me3	1	D3200451	ERR9992570	ERX9534369	PRJEB55010	ERP139878	563bc011103357cb5dc64d4f0b815480	6ddc9790a66838174400ef0ec25ea6fe	100387420	SAMEA110410389	SAMEA110410480	ERR9992568	ERX9534367	PRJEB55010	ERP139878
RainbowTrout	DevMap	Mid Somitogenesis	n.a.	n.a.	SAMEA110410389	SAMEA110410480	ChIP-Seq	H3K4me3	2	D3200452	ERR9992571	ERX9534370	PRJEB55010	ERP139878	2b92fc37a8001f73be284c95513961f8	55c243cf1cd8cfa2a875884d3e074b8e	93081184	SAMEA110410389	SAMEA110410486	ERR9992569	ERX9534368	PRJEB55010	ERP139878
RainbowTrout	DevMap	Mid Somitogenesis	n.a.	n.a.	SAMEA110410389	SAMEA110410486	ChIP-Seq	H3K4me3	3	D3200453	ERR9992572	ERX9534371	PRJEB55010	ERP139878	e050d205d08f74e58f9727347074764b	857c6f6569afb79e450448a5e770c32c	101428660	SAMEA110410389	SAMEA110410474	ERR9992570	ERX9534369	PRJEB55010	ERP139878
RainbowTrout	DevMap	Mid Somitogenesis	n.a.	n.a.	SAMEA110410389	SAMEA110410474	ChIP-Seq	Input	1	D3200462	ERR9992573	ERX9534372	PRJEB55010	ERP139878	3e3376242c8d959ba480b36711110c75	07dca03a7747534a9f75ad14dcda2a4e	196740880	SAMEA110410389	SAMEA110410480	ERR9992571	ERX9534370	PRJEB55010	ERP139878
RainbowTrout	DevMap	LateSomitogenesis	n.a.	n.a.	SAMEA110410390	SAMEA110410475	ChIP-Seq	H3K27ac	1	D3200521	ERR9992574	ERX9534373	PRJEB55010	ERP139878	fca9d8dc96d18fc57728c447d9498a28	6d9fb3fca389d8b80001f7ab49851ef0	103166512	SAMEA110410389	SAMEA110410486	ERR9992572	ERX9534371	PRJEB55010	ERP139878
RainbowTrout	DevMap	LateSomitogenesis	n.a.	n.a.	SAMEA110410390	SAMEA110410481	ChIP-Seq	H3K27ac	2	D3200522	ERR9992575	ERX9534374	PRJEB55010	ERP139878	d687bdd42aeee881a75fbcd16aff787d	353546eaecbebb75566e1271a330fd9e	101210808	SAMEA110410389	SAMEA110410474	ERR9992573	ERX9534372	PRJEB55010	ERP139878
RainbowTrout	DevMap	LateSomitogenesis	n.a.	n.a.	SAMEA110410390	SAMEA110410487	ChIP-Seq	H3K27ac	3	D3200523	ERR9992576	ERX9534375	PRJEB55010	ERP139878	989fde5f34db94de77b0c20bd2dce818	5743e936e9267cfa50f9ac7d0e07e0b6	132300182	SAMEA110410390	SAMEA110410475	ERR9992574	ERX9534373	PRJEB55010	ERP139878
RainbowTrout	DevMap	LateSomitogenesis	n.a.	n.a.	SAMEA110410390	SAMEA110410475	ChIP-Seq	H3K27me3	1	D3200531	ERR9992577	ERX9534376	PRJEB55010	ERP139878	c8c3573ac1dbd58607ffd31d98a04abf	57aed4c3139225f3d3bcc33172546e01	105216390	SAMEA110410390	SAMEA110410481	ERR9992575	ERX9534374	PRJEB55010	ERP139878
RainbowTrout	DevMap	LateSomitogenesis	n.a.	n.a.	SAMEA110410390	SAMEA110410481	ChIP-Seq	H3K27me3	2	D3200532	ERR9992578	ERX9534377	PRJEB55010	ERP139878	8d9c5e9e73c8bf8b4a854c0c677ab8ae	3d0afd5a399e636c0cd643af52f5c6b8	101522866	SAMEA110410390	SAMEA110410487	ERR9992576	ERX9534375	PRJEB55010	ERP139878
RainbowTrout	DevMap	LateSomitogenesis	n.a.	n.a.	SAMEA110410390	SAMEA110410487	ChIP-Seq	H3K27me3	3	D3200533	ERR9992579	ERX9534378	PRJEB55010	ERP139878	73685c3d12deccd4fd502c81beeb5071	5987e30d86963832064ba28b321044ff	101570850	SAMEA110410390	SAMEA110410475	ERR9992577	ERX9534376	PRJEB55010	ERP139878
RainbowTrout	DevMap	LateSomitogenesis	n.a.	n.a.	SAMEA110410390	SAMEA110410475	ChIP-Seq	H3K4me1	1	D3200541	ERR9992580	ERX9534379	PRJEB55010	ERP139878	042476eb3d9fecb90b9bb6866a3b5de4	8d9c5879a6786466236c99b491c5252f	190897204	SAMEA110410390	SAMEA110410481	ERR9992578	ERX9534377	PRJEB55010	ERP139878
RainbowTrout	DevMap	LateSomitogenesis	n.a.	n.a.	SAMEA110410390	SAMEA110410481	ChIP-Seq	H3K4me1	2	D3200542	ERR9992581	ERX9534380	PRJEB55010	ERP139878	1cb0d975a3e9f94ead886fe01f3dd08d	039f4a4871e5868337a8c2717fb60592	109613734	SAMEA110410390	SAMEA110410487	ERR9992579	ERX9534378	PRJEB55010	ERP139878
RainbowTrout	DevMap	LateSomitogenesis	n.a.	n.a.	SAMEA110410390	SAMEA110410487	ChIP-Seq	H3K4me1	3	D3200543	ERR9992582	ERX9534381	PRJEB55010	ERP139878	0d471f1d4fd74ef88196ad2cadf8d763	9175b81695eb92ea6aff6b866d88e266	122314450	SAMEA110410390	SAMEA110410475	ERR9992580	ERX9534379	PRJEB55010	ERP139878
RainbowTrout	DevMap	LateSomitogenesis	n.a.	n.a.	SAMEA110410390	SAMEA110410475	ChIP-Seq	H3K4me3	1	D3200551	ERR9992583	ERX9534382	PRJEB55010	ERP139878	a8431990186b2dfac91eaca219a3594c	affc2b894a6b1eeefd8c7a4182adb43b	91313222	SAMEA110410390	SAMEA110410481	ERR9992581	ERX9534380	PRJEB55010	ERP139878
RainbowTrout	DevMap	LateSomitogenesis	n.a.	n.a.	SAMEA110410390	SAMEA110410481	ChIP-Seq	H3K4me3	2	D3200552	ERR9992584	ERX9534383	PRJEB55010	ERP139878	d6ab331df51de84d3a832ed52db4e6d1	d77c225d5ca184f023709fef2db85451	110258252	SAMEA110410390	SAMEA110410487	ERR9992582	ERX9534381	PRJEB55010	ERP139878
RainbowTrout	DevMap	LateSomitogenesis	n.a.	n.a.	SAMEA110410390	SAMEA110410487	ChIP-Seq	H3K4me3	3	D3200553	ERR9992585	ERX9534384	PRJEB55010	ERP139878	3d3e4d4da8b1c30e04371edd308b5e24	5b283b44ee49e16f5406ead49f79b988	105803852	SAMEA110410390	SAMEA110410475	ERR9992583	ERX9534382	PRJEB55010	ERP139878
RainbowTrout	DevMap	LateSomitogenesis	n.a.	n.a.	SAMEA110410390	SAMEA110410475	ChIP-Seq	Input	1	D3200562	ERR9992586	ERX9534385	PRJEB55010	ERP139878	171281d1215ad1f9812900c5808262a1	9f2cba80d98628fd5c4a0ed90dff0100	185226904	SAMEA110410390	SAMEA110410481	ERR9992584	ERX9534383	PRJEB55010	ERP139878
RainbowTrout	DevMap	Late Blastulation	n.a.	n.a.	SAMEA9835684	SAMEA9835712	RNA-Seq	reverse	1	D3300101	ERR9360797	ERX8902731	PRJEB51857	ERP136507	0f7540d7664f88c97baacaf5101e7974	67f1b823fe9e39e4727df892754f2d6b	70466748	SAMEA110410390	SAMEA110410487	ERR9992585	ERX9534384	PRJEB55010	ERP139878
RainbowTrout	DevMap	Late Blastulation	n.a.	n.a.	SAMEA9835684	SAMEA9835740	RNA-Seq	reverse	2	D3300102	ERR9360798	ERX8902732	PRJEB51857	ERP136507	e39c13587b361f27ae6737bb79d137f6	1a94e68501eeda099d6d51124fd8f94c	60023610	SAMEA110410390	SAMEA110410475	ERR9992586	ERX9534385	PRJEB55010	ERP139878
RainbowTrout	DevMap	Late Blastulation	n.a.	n.a.	SAMEA9835684	SAMEA9835768	RNA-Seq	reverse	3	D3300103	ERR9360799	ERX8902733	PRJEB51857	ERP136507	a4c39462c9877b25652252da95c17f01	b0f8fbbbd44984ea0366b3f839dd7b06	63387166	SAMEA9835684	SAMEA9835712	ERR9360797	ERX8902731	PRJEB51857	ERP136507
RainbowTrout	DevMap	Mid Gastrulation	n.a.	n.a.	SAMEA9835686	SAMEA9835714	RNA-Seq	reverse	1	D3300201	ERR9360800	ERX8902734	PRJEB51857	ERP136507	3e155589c19d54d28c5bf5894c39589c	3fcaf3d894734dbdb9c086249a1ec4e6	62304090	SAMEA9835684	SAMEA9835740	ERR9360798	ERX8902732	PRJEB51857	ERP136507
RainbowTrout	DevMap	Mid Gastrulation	n.a.	n.a.	SAMEA9835686	SAMEA9835742	RNA-Seq	reverse	2	D3300202	ERR9360802	ERX8902735	PRJEB51857	ERP136507	41b1b577fb1481524264ae50e3959900	5a64128f541a556ad6c7268817b4f0f9	61724930	SAMEA9835684	SAMEA9835768	ERR9360799	ERX8902733	PRJEB51857	ERP136507
RainbowTrout	DevMap	Mid Gastrulation	n.a.	n.a.	SAMEA9835686	SAMEA9835770	RNA-Seq	reverse	3	d3300203	ERR9360803	ERX8902736	PRJEB51857	ERP136507	3103e9ff81ec68eea0e880f434635840	66e9903146f799028b9f7d07e8214599	117550780	SAMEA9835686	SAMEA9835714	ERR9360800	ERX8902734	PRJEB51857	ERP136507
RainbowTrout	DevMap	Early Somitogenesis	n.a.	n.a.	SAMEA9835688	SAMEA9835716	RNA-Seq	reverse	1	D3300301	ERR9360804	ERX8902737	PRJEB51857	ERP136507	f1d0bd3d130ae49147938ea8f513a499	4be41f67558ccec35f407bfdd201feec	59017592	SAMEA9835686	SAMEA9835742	ERR9360802	ERX8902735	PRJEB51857	ERP136507
RainbowTrout	DevMap	Early Somitogenesis	n.a.	n.a.	SAMEA9835688	SAMEA9835744	RNA-Seq	reverse	2	D3300302	ERR9360805	ERX8902738	PRJEB51857	ERP136507	85c17b6a626ad28b2225738b564f210a	e93f29fb4498528c7eb56fa253dde0c6	81345652	SAMEA9835686	SAMEA9835770	ERR9360803	ERX8902736	PRJEB51857	ERP136507
RainbowTrout	DevMap	Early Somitogenesis	n.a.	n.a.	SAMEA9835688	SAMEA9835772	RNA-Seq	reverse	3	D3300303	ERR9360806	ERX8902739	PRJEB51857	ERP136507	ca2ce421261f848e7e7064677cda93b1	0ec0ad800df505ba22b867d21b299703	62442148	SAMEA9835688	SAMEA9835716	ERR9360804	ERX8902737	PRJEB51857	ERP136507
RainbowTrout	DevMap	Mid Somitogenesis	n.a.	n.a.	SAMEA9835690	SAMEA9835718	RNA-Seq	reverse	1	D3300401	ERR9360807	ERX8902740	PRJEB51857	ERP136507	b10d2a376c9b39718528960c0a12ad84	c8a6c3a24785a6315249846d95c47cd4	63320988	SAMEA9835688	SAMEA9835744	ERR9360805	ERX8902738	PRJEB51857	ERP136507
RainbowTrout	DevMap	Mid Somitogenesis	n.a.	n.a.	SAMEA9835690	SAMEA9835746	RNA-Seq	reverse	2	D3300402	ERR9360808	ERX8902741	PRJEB51857	ERP136507	7eeabf637a9834f2c16d53f2ec213860	329499713e15ed167d40d7dec495237a	65549958	SAMEA9835688	SAMEA9835772	ERR9360806	ERX8902739	PRJEB51857	ERP136507
RainbowTrout	DevMap	Mid Somitogenesis	n.a.	n.a.	SAMEA9835690	SAMEA9835774	RNA-Seq	reverse	3	D3300403	ERR9360809	ERX8902742	PRJEB51857	ERP136507	059b13daa680ad132bcdf9e972ef2077	6e4b3bbd1739902c7b14f6cec1695b3c	62216064	SAMEA9835690	SAMEA9835718	ERR9360807	ERX8902740	PRJEB51857	ERP136507
RainbowTrout	DevMap	LateSomitogenesis	n.a.	n.a.	SAMEA9835692	SAMEA9835720	RNA-Seq	reverse	1	D3300501	ERR9360810	ERX8902743	PRJEB51857	ERP136507	af0d791cb3849f4b5a21f165f31789a2	1b9ab1698bbabfad0f7a9d055979d200	78380322	SAMEA9835690	SAMEA9835746	ERR9360808	ERX8902741	PRJEB51857	ERP136507
RainbowTrout	DevMap	LateSomitogenesis	n.a.	n.a.	SAMEA9835692	SAMEA9835748	RNA-Seq	reverse	2	D3300502	ERR9360811	ERX8902744	PRJEB51857	ERP136507	8e1f8fdf43ea7f635196cf70b1a63042	64871a5a9242063643679af0f075e951	81221348	SAMEA9835690	SAMEA9835774	ERR9360809	ERX8902742	PRJEB51857	ERP136507
RainbowTrout	DevMap	LateSomitogenesis	n.a.	n.a.	SAMEA9835692	SAMEA9835776	RNA-Seq	reverse	3	D3300503	ERR9360812	ERX8902745	PRJEB51857	ERP136507	5e2866426ccf1b028bc43aaeafa8eb69	6fccfde31173a46dd0b7e3ba8f7c039e	63201538	SAMEA9835692	SAMEA9835720	ERR9360810	ERX8902743	PRJEB51857	ERP136507
RainbowTrout	DevMap	LateCleavage	n.a.	n.a.	SAMEA9835681	SAMEA9835709	RNA-Seq	reverse	1	D3300701	ERR9360816	ERX8902749	PRJEB51857	ERP136507	b1e0555e22847d2c2e40bf98c06eba3a	9733f0e448e821ef736534a8c2c57e53	60350418	SAMEA9835692	SAMEA9835748	ERR9360811	ERX8902744	PRJEB51857	ERP136507
RainbowTrout	DevMap	LateCleavage	n.a.	n.a.	SAMEA9835681	SAMEA9835737	RNA-Seq	reverse	2	D3300702	ERR9360817	ERX8902750	PRJEB51857	ERP136507	1f3f9fa074eba15dcb6c59f1456b6576	f341e400ad944d592ad268846b179315	62434032	SAMEA9835692	SAMEA9835776	ERR9360812	ERX8902745	PRJEB51857	ERP136507
RainbowTrout	DevMap	LateCleavage	n.a.	n.a.	SAMEA9835681	SAMEA9835738	RNA-Seq	reverse	3	D3300802	ERR9360818	ERX8902753	PRJEB51857	ERP136507	57de126f17e2c26c58f561f13e7547a4	99521622f8f6255e3ce9e23500c61305	65695242	SAMEA9835681	SAMEA9835709	ERR9360816	ERX8902749	PRJEB51857	ERP136507
RainbowTrout	DevMap	EarlyBlastulation	n.a.	n.a.	SAMEA9835682	SAMEA9835710	RNA-Seq	reverse	1	D3300801	ERR9360819	ERX8902752	PRJEB51857	ERP136507	3b15366627709a26bcd8b04b1b710403	5f79e89f5a2cacf820e9f3a416dcb01d	64677270	SAMEA9835681	SAMEA9835737	ERR9360817	ERX8902750	PRJEB51857	ERP136507
RainbowTrout	DevMap	EarlyBlastulation	n.a.	n.a.	SAMEA9835682	SAMEA9835765	RNA-Seq	reverse	2	D3300703	ERR9360820	ERX8902751	PRJEB51857	ERP136507	a31e3d5d500aea09d19b97fbfc65855d	e4bdfe30537398fe1bd898ad6f6af57b	64927990	SAMEA9835681	SAMEA9835738	ERR9360818	ERX8902753	PRJEB51857	ERP136507
RainbowTrout	DevMap	EarlyBlastulation	n.a.	n.a.	SAMEA9835682	SAMEA9835766	RNA-Seq	reverse	3	D3300803	ERR9360821	ERX8902754	PRJEB51857	ERP136507	04957d927128a974c9a148786db0e345	7c9a2c6fd4660b595680836fa57306db	63612962	SAMEA9835682	SAMEA9835710	ERR9360819	ERX8902752	PRJEB51857	ERP136507
RainbowTrout	DevMap	MidBlastulation	n.a.	n.a.	SAMEA9835683	SAMEA9835711	RNA-Seq	reverse	1	D3300901	ERR9360822	ERX8902755	PRJEB51857	ERP136507	0ed6bd1fd7770e2b9097ba1f0fa5b9d8	990f7ac92df8e33c75e99d30ea3c3e1b	64481758	SAMEA9835682	SAMEA9835765	ERR9360820	ERX8902751	PRJEB51857	ERP136507
RainbowTrout	DevMap	MidBlastulation	n.a.	n.a.	SAMEA9835683	SAMEA9835739	RNA-Seq	reverse	2	D3300902	ERR9360823	ERX8902756	PRJEB51857	ERP136507	b6832d5177b2d37e6dce5de90dd5c3fb	718c0ea40579911e3f5e9d9b11c90b99	64931224	SAMEA9835682	SAMEA9835766	ERR9360821	ERX8902754	PRJEB51857	ERP136507
RainbowTrout	DevMap	MidBlastulation	n.a.	n.a.	SAMEA9835683	SAMEA9835767	RNA-Seq	reverse	3	D3300903	ERR9360824	ERX8902757	PRJEB51857	ERP136507	e7077b711dcfef26f1e1d75b59167b2f	1799589686397b24731cbccfff9e020f	63052156	SAMEA9835683	SAMEA9835711	ERR9360822	ERX8902755	PRJEB51857	ERP136507
RainbowTrout	DevMap	EarlyGastrulation	n.a.	n.a.	SAMEA9835685	SAMEA9835713	RNA-Seq	reverse	1	D3301001	ERR9360825	ERX8902758	PRJEB51857	ERP136507	96d00ac2324952a13fc80a1fc8b64356	60c6fea146d4b129c50890060b7465ba	66568634	SAMEA9835683	SAMEA9835739	ERR9360823	ERX8902756	PRJEB51857	ERP136507
RainbowTrout	DevMap	EarlyGastrulation	n.a.	n.a.	SAMEA9835685	SAMEA9835741	RNA-Seq	reverse	2	D3301002	ERR9360826	ERX8902759	PRJEB51857	ERP136507	eddb24ef569b474542325a03ba3f34c4	db9820f085e4a228e3deaa810c5d9003	64198486	SAMEA9835683	SAMEA9835767	ERR9360824	ERX8902757	PRJEB51857	ERP136507
RainbowTrout	DevMap	EarlyGastrulation	n.a.	n.a.	SAMEA9835685	SAMEA9835769	RNA-Seq	reverse	3	D3301003	ERR9360827	ERX8902760	PRJEB51857	ERP136507	fe67b10b81bc6cf624fdf02b838f86fb	6f30d286f9a0e2822edd481998766218	64755482	SAMEA9835685	SAMEA9835713	ERR9360825	ERX8902758	PRJEB51857	ERP136507
RainbowTrout	DevMap	LateGastrulation	n.a.	n.a.	SAMEA9835687	SAMEA9835715	RNA-Seq	reverse	1	D3301101	ERR9360828	ERX8902761	PRJEB51857	ERP136507	a74a4785ffab18b580079a149642bee9	48ec71b740c5aeef3b0bf0d56a704d63	63058954	SAMEA9835685	SAMEA9835741	ERR9360826	ERX8902759	PRJEB51857	ERP136507
RainbowTrout	DevMap	LateGastrulation	n.a.	n.a.	SAMEA9835687	SAMEA9835743	RNA-Seq	reverse	2	D3301102	ERR9360829	ERX8902762	PRJEB51857	ERP136507	e80fb174b4e28d5b23f7fffa0bdf7897	453c78168d73ee933f2cbd4b0b24a0a4	66096602	SAMEA9835685	SAMEA9835769	ERR9360827	ERX8902760	PRJEB51857	ERP136507
RainbowTrout	DevMap	LateGastrulation	n.a.	n.a.	SAMEA9835687	SAMEA9835771	RNA-Seq	reverse	3	D3301103	ERR9360830	ERX8902763	PRJEB51857	ERP136507	d9917ef3277b883ed36f90b27904ae2f	83f3ec87872cd5ca31489de59749eb52	64196672	SAMEA9835687	SAMEA9835715	ERR9360828	ERX8902761	PRJEB51857	ERP136507
RainbowTrout	DevMap	EarlyMid Somitogenesis	n.a.	n.a.	SAMEA9835689	SAMEA9835717	RNA-Seq	reverse	1	D3301201	ERR9360831	ERX8902764	PRJEB51857	ERP136507	610d3eb1e4cd6b09cc1cf93f61ca2846	615d6fcd7239859961e0d56ae6ad6b9f	59408824	SAMEA9835687	SAMEA9835743	ERR9360829	ERX8902762	PRJEB51857	ERP136507
RainbowTrout	DevMap	EarlyMid Somitogenesis	n.a.	n.a.	SAMEA9835689	SAMEA9835745	RNA-Seq	reverse	2	D3301202	ERR9360832	ERX8902765	PRJEB51857	ERP136507	62d790d92df020ef235d0b3c9662bd80	a7e30ba73f35149d0cbba7daa5217769	64171826	SAMEA9835687	SAMEA9835771	ERR9360830	ERX8902763	PRJEB51857	ERP136507
RainbowTrout	DevMap	EarlyMid Somitogenesis	n.a.	n.a.	SAMEA9835689	SAMEA9835773	RNA-Seq	reverse	3	D3301203	ERR9360833	ERX8902766	PRJEB51857	ERP136507	d9e9a83013278a7b199dff0f46569860	bc7c5860b91a2c4164efe659e7131a19	63875286	SAMEA9835689	SAMEA9835717	ERR9360831	ERX8902764	PRJEB51857	ERP136507
RainbowTrout	DevMap	MidLateSomitogenesis	n.a.	n.a.	SAMEA9835691	SAMEA9835719	RNA-Seq	reverse	1	D3301301	ERR9360834	ERX8902767	PRJEB51857	ERP136507	ce87663789ef37b62975fe6b4a78aa27	5a5430c7fbcf437a688b1c3f56575a13	61615876	SAMEA9835689	SAMEA9835745	ERR9360832	ERX8902765	PRJEB51857	ERP136507
RainbowTrout	DevMap	MidLateSomitogenesis	n.a.	n.a.	SAMEA9835691	SAMEA9835747	RNA-Seq	reverse	2	D3301302	ERR9360835	ERX8902768	PRJEB51857	ERP136507	5e9da7fd9f35b0dd09b740337bf67953	409c187ff02fda26dcd87a6911c3c58f	64001494	SAMEA9835689	SAMEA9835773	ERR9360833	ERX8902766	PRJEB51857	ERP136507
RainbowTrout	DevMap	MidLateSomitogenesis	n.a.	n.a.	SAMEA9835691	SAMEA9835775	RNA-Seq	reverse	3	D3301303	ERR9360836	ERX8902769	PRJEB51857	ERP136507	617540b4d9f84b1ec95a64ad841133ef	b24a48b947dd26671629ed291ba1509b	62940464	SAMEA9835691	SAMEA9835719	ERR9360834	ERX8902767	PRJEB51857	ERP136507
RainbowTrout	BodyMap	Gonad	Immature	Female	SAMEA9372097	SAMEA9372126	ATAC-Seq	n.a.	1	B3110403	ERR10445776	ERX9970409	PRJEB57190	ERP142158	d1261588af27c1ca01c902f7063d8103	c9930663baab4e4dba18f99bbf4bd4e7	71206654	SAMEA9835691	SAMEA9835747	ERR9360835	ERX8902768	PRJEB51857	ERP136507
RainbowTrout	BodyMap	Liver	Immature	Female	SAMEA9372097	SAMEA9372128	ATAC-Seq	n.a.	1	B3110405	ERR10445765	ERX9970398	PRJEB57190	ERP142158	382d82c394e5a78efece3bad025f1a96	4318c3d1bc81e52c46eded224ec162d7	83793150	SAMEA9835691	SAMEA9835775	ERR9360836	ERX8902769	PRJEB51857	ERP136507
RainbowTrout	BodyMap	Gonad	Immature	Female	SAMEA9372098	SAMEA9372131	ATAC-Seq	n.a.	2	B3110503	ERR10445777	ERX9970410	PRJEB57190	ERP142158	028eb1d3c38af54173b75810b8b2499b	cccaf4fadd98ecb0b627fa6a7e8db64e	72413398	SAMEA9372097	SAMEA9372126	ERR10445776	ERX9970409	PRJEB57190	ERP142158
RainbowTrout	BodyMap	Liver	Immature	Female	SAMEA9372098	SAMEA9372133	ATAC-Seq	n.a.	2	B3110505	ERR10445766	ERX9970399	PRJEB57190	ERP142158	e0cbe95f441a0c0d5c79021603b12224	f043bee8cbeb9ff7093e64a04f530a36	73539460	SAMEA9372097	SAMEA9372128	ERR10445765	ERX9970398	PRJEB57190	ERP142158
RainbowTrout	BodyMap	Gonad	Immature	Female	SAMEA9372100	SAMEA9372141	ATAC-Seq	n.a.	3	B3110903	ERR10445778	ERX9970411	PRJEB57190	ERP142158	65d58ea08fbfea8f20e18b594a42b4b8	c973d3576c2cadcc9853b2fed342a700	78396188	SAMEA9372098	SAMEA9372131	ERR10445777	ERX9970410	PRJEB57190	ERP142158
RainbowTrout	BodyMap	Liver	Immature	Female	SAMEA9372100	SAMEA9372143	ATAC-Seq	n.a.	3	B3110905	ERR10445768	ERX9970401	PRJEB57190	ERP142158	859dc36573c9dab5302196a05bf9568d	a014ee17190ae10a4a07ca538986927d	77146532	SAMEA9372098	SAMEA9372133	ERR10445766	ERX9970399	PRJEB57190	ERP142158
RainbowTrout	BodyMap	Brain	Immature	Female	SAMEA9372103	SAMEA9372151	ATAC-Seq	n.a.	1	B3111301	ERR10445753	ERX9970386	PRJEB57190	ERP142158	01c0182208804890e36aa8dfdb0d6d9d	027d6ee95f4d7388fd4ad7f3d2cbaa40	118964244	SAMEA9372100	SAMEA9372141	ERR10445778	ERX9970411	PRJEB57190	ERP142158
RainbowTrout	BodyMap	Brain	Immature	Female	SAMEA9372104	SAMEA9372152	ATAC-Seq	n.a.	2	B3111501	ERR10445754	ERX9970387	PRJEB57190	ERP142158	7c2caf524b79b04d92b8efd417ac5175	e84a5eb0ae54fe4757e9fd39a4940fa8	80759490	SAMEA9372100	SAMEA9372143	ERR10445768	ERX9970401	PRJEB57190	ERP142158
RainbowTrout	BodyMap	Brain	Immature	Female	SAMEA9372106	SAMEA9372154	ATAC-Seq	n.a.	3	B3111701	ERR10445756	ERX9970389	PRJEB57190	ERP142158	04a6b6da3390fe9aa499a7432f377bb7	4ff83a10265f6be9852721f52ef904d9	91636972	SAMEA9372103	SAMEA9372151	ERR10445753	ERX9970386	PRJEB57190	ERP142158
RainbowTrout	BodyMap	Muscle	Immature	Female	SAMEA9372109	SAMEA9372157	ATAC-Seq	n.a.	1	B3113006	ERR10445783	ERX9970416	PRJEB57190	ERP142158	ddb9a74963ef5353694aa3d0c8ddff3c	f21806cf5473d57fb0eac0b95af9dcb2	78836820	SAMEA9372104	SAMEA9372152	ERR10445754	ERX9970387	PRJEB57190	ERP142158
RainbowTrout	BodyMap	Muscle	Immature	Female	SAMEA9372110	SAMEA9372158	ATAC-Seq	n.a.	2	B3113106	ERR10445784	ERX9970417	PRJEB57190	ERP142158	58c8f7884249dc3449861909dc1252bf	9ef81d572d11362114f3c5f556158ce0	227667822	SAMEA9372106	SAMEA9372154	ERR10445756	ERX9970389	PRJEB57190	ERP142158
RainbowTrout	BodyMap	Muscle	Immature	Female	SAMEA9372111	SAMEA9372159	ATAC-Seq	n.a.	3	B3113306	ERR10445785	ERX9970418	PRJEB57190	ERP142158	5731789b0753c94e3f5022d3aad7c01c	19d9031b7ea8d5ac7bd674e323896ae0	52315190	SAMEA9372109	SAMEA9372157	ERR10445783	ERX9970416	PRJEB57190	ERP142158
RainbowTrout	BodyMap	Liver	Immature	Male	SAMEA9372096	SAMEA9372123	ATAC-Seq	n.a.	1	B3120105	ERR10445764	ERX9970397	PRJEB57190	ERP142158	1a1ef156ca6ba92fd752985183307b3d	0a268d99cdabdf3e1221b3ad51049995	65815984	SAMEA9372110	SAMEA9372158	ERR10445784	ERX9970417	PRJEB57190	ERP142158
RainbowTrout	BodyMap	Liver	Immature	Male	SAMEA9372099	SAMEA9372138	ATAC-Seq	n.a.	2	B3120805	ERR10445767	ERX9970400	PRJEB57190	ERP142158	1ca6aae3adf74f29d21f9349c5f4908c	689d26fde21125d0b5b1f1cf703b2106	79870526	SAMEA9372111	SAMEA9372159	ERR10445785	ERX9970418	PRJEB57190	ERP142158
RainbowTrout	BodyMap	Liver	Immature	Male	SAMEA9372101	SAMEA9372148	ATAC-Seq	n.a.	3	B3121005	ERR10445769	ERX9970402	PRJEB57190	ERP142158	4d5b26ad64dfe681d056f12c56ad5602	164e03649dc01559fae67a02222c2568	79458386	SAMEA9372096	SAMEA9372123	ERR10445764	ERX9970397	PRJEB57190	ERP142158
RainbowTrout	BodyMap	Brain	Immature	Male	SAMEA9372102	SAMEA9372150	ATAC-Seq	n.a.	1	B3121101	ERR10445752	ERX9970385	PRJEB57190	ERP142158	1d617fafba05356eaa8c831fd04d311a	7722b00618291ed12ede7679542507e0	81265630	SAMEA9372099	SAMEA9372138	ERR10445767	ERX9970400	PRJEB57190	ERP142158
RainbowTrout	BodyMap	Brain	Immature	Male	SAMEA9372105	SAMEA9372153	ATAC-Seq	n.a.	2	B3121601	ERR10445755	ERX9970388	PRJEB57190	ERP142158	8060530afdb26aaf764f9f68f617d39d	916c235125b5972bcf56b7b8d195b55a	79528176	SAMEA9372101	SAMEA9372148	ERR10445769	ERX9970402	PRJEB57190	ERP142158
RainbowTrout	BodyMap	Brain	Immature	Male	SAMEA9372107	SAMEA9372155	ATAC-Seq	n.a.	3	B3121901	ERR10445757	ERX9970390	PRJEB57190	ERP142158	33b76886cb4147e5dfcd7caeac168800	76cff3a8841a8de22bdb9b6720b6296e	92210860	SAMEA9372102	SAMEA9372150	ERR10445752	ERX9970385	PRJEB57190	ERP142158
RainbowTrout	BodyMap	Muscle	Immature	Male	SAMEA9372108	SAMEA9372156	ATAC-Seq	n.a.	1	B3122806	ERR10445782	ERX9970415	PRJEB57190	ERP142158	d10c1b29e709c5a2539c6e7b93c201a2	f1c6d5db25e3f0b6e6fd943cc1deb014	72113298	SAMEA9372105	SAMEA9372153	ERR10445755	ERX9970388	PRJEB57190	ERP142158
RainbowTrout	BodyMap	Muscle	Immature	Male	SAMEA9372112	SAMEA9372160	ATAC-Seq	n.a.	2	B3123406	ERR10445786	ERX9970419	PRJEB57190	ERP142158	24df52394c7a2b0127956ad33cbc774f	279b84fca63017b4c0a5122918267448	190231354	SAMEA9372107	SAMEA9372155	ERR10445757	ERX9970390	PRJEB57190	ERP142158
RainbowTrout	BodyMap	Muscle	Immature	Male	SAMEA9372113	SAMEA9372161	ATAC-Seq	n.a.	3	B3123606	ERR10445787	ERX9970420	PRJEB57190	ERP142158	ae588274eb62a651819706e74821b187	98aebf85c0c945d92bb4911b4480fe3a	79528510	SAMEA9372108	SAMEA9372156	ERR10445782	ERX9970415	PRJEB57190	ERP142158
RainbowTrout	BodyMap	Gonad	Immature	Male	SAMEA14200973	SAMEA14200979	ATAC-Seq	n.a.	1	B3124403	ERR10445800	ERX9970433	PRJEB57190	ERP142158	8ab7222b104194583a58d4aa1b2b88d3	573882016fee17302ea53bc27d21a1dd	96754210	SAMEA9372112	SAMEA9372160	ERR10445786	ERX9970419	PRJEB57190	ERP142158
RainbowTrout	BodyMap	Gonad	Immature	Male	SAMEA14200974	SAMEA14200980	ATAC-Seq	n.a.	2	B3124503	ERR10445801	ERX9970434	PRJEB57190	ERP142158	1a132d2ca18073433f6d262ff85352d2	37884f097a21d2f5c5f8f568af1acc2a	86891420	SAMEA9372113	SAMEA9372161	ERR10445787	ERX9970420	PRJEB57190	ERP142158
RainbowTrout	BodyMap	Gonad	Immature	Male	SAMEA14200975	SAMEA14200981	ATAC-Seq	n.a.	3	B3124603	ERR10445802	ERX9970435	PRJEB57190	ERP142158	34386b9d7f0654329fae8b70c2722e0a	dd8a6acbba7770225c05ad51a88a443d	86807036	SAMEA14200973	SAMEA14200979	ERR10445800	ERX9970433	PRJEB57190	ERP142158
RainbowTrout	BodyMap	Brain	Mature	Female	SAMEA9372117	SAMEA9372189	ATAC-Seq	n.a.	1	B3134101	ERR10445761	ERX9970394	PRJEB57190	ERP142158	dfb1f0f293a35b2b650920f8c8ca9fb3	35a243a8477d58278eee8d1af83adce8	74303196	SAMEA14200974	SAMEA14200980	ERR10445801	ERX9970434	PRJEB57190	ERP142158
RainbowTrout	BodyMap	Gonad	Mature	Female	SAMEA9372117	SAMEA9372184	ATAC-Seq	n.a.	1	B3134103	ERR10445779	ERX9970412	PRJEB57190	ERP142158	d345d9e15c97e6b73039e923f9ad65c1	fe6a567d1bfb79df26ee9669ca257fa3	64527620	SAMEA14200975	SAMEA14200981	ERR10445802	ERX9970435	PRJEB57190	ERP142158
RainbowTrout	BodyMap	Liver	Mature	Female	SAMEA9372117	SAMEA9372186	ATAC-Seq	n.a.	1	B3134105	ERR10445773	ERX9970406	PRJEB57190	ERP142158	07e8c2b8c301bb5a0fafba4c44723371	1d1f9275481c531dada2026dca7f8c7c	91598832	SAMEA9372117	SAMEA9372189	ERR10445761	ERX9970394	PRJEB57190	ERP142158
RainbowTrout	BodyMap	Muscle	Mature	Female	SAMEA9372117	SAMEA9372188	ATAC-Seq	n.a.	1	B3134106	ERR10445791	ERX9970424	PRJEB57190	ERP142158	7a53742f950e236ca1bd3c0afc7e8bb0	5b2878a69f839e25f84d5f6e5c9e93e6	89779930	SAMEA9372117	SAMEA9372184	ERR10445779	ERX9970412	PRJEB57190	ERP142158
RainbowTrout	BodyMap	Brain	Mature	Female	SAMEA9372118	SAMEA9372196	ATAC-Seq	n.a.	2	B3134201	ERR10445762	ERX9970395	PRJEB57190	ERP142158	f428859e3d2509b7b2f4e8d561b327be	6ae2c63ba1013aedd2113bbeb371b62b	71702424	SAMEA9372117	SAMEA9372186	ERR10445773	ERX9970406	PRJEB57190	ERP142158
RainbowTrout	BodyMap	Gonad	Mature	Female	SAMEA9372118	SAMEA9372191	ATAC-Seq	n.a.	2	B3134203	ERR10445780	ERX9970413	PRJEB57190	ERP142158	e658f9f5dad221971dbf7254c8be1542	cefbe6cba72188ad577281fb75534b48	81908504	SAMEA9372117	SAMEA9372188	ERR10445791	ERX9970424	PRJEB57190	ERP142158
RainbowTrout	BodyMap	Liver	Mature	Female	SAMEA9372118	SAMEA9372193	ATAC-Seq	n.a.	2	B3134205	ERR10445774	ERX9970407	PRJEB57190	ERP142158	67f895ffd93a59cc5a09506879c7cfc4	6efb6149c21db48c317e31b69aac345e	80670448	SAMEA9372118	SAMEA9372196	ERR10445762	ERX9970395	PRJEB57190	ERP142158
RainbowTrout	BodyMap	Muscle	Mature	Female	SAMEA9372118	SAMEA9372195	ATAC-Seq	n.a.	2	B3134206	ERR10445792	ERX9970425	PRJEB57190	ERP142158	3dc7a452d92cd9284c0afc761d8a24f6	802ffa51c6213627ca6f6a835727c442	65982474	SAMEA9372118	SAMEA9372191	ERR10445780	ERX9970413	PRJEB57190	ERP142158
RainbowTrout	BodyMap	Brain	Mature	Female	SAMEA9372119	SAMEA9372203	ATAC-Seq	n.a.	3	B3134301	ERR10445763	ERX9970396	PRJEB57190	ERP142158	4285100c4d864b162fd23669821589f7	8b3d652df901e1b7950cfccb79135e52	68936528	SAMEA9372118	SAMEA9372193	ERR10445774	ERX9970407	PRJEB57190	ERP142158
RainbowTrout	BodyMap	Gonad	Mature	Female	SAMEA9372119	SAMEA9372198	ATAC-Seq	n.a.	3	B3134303	ERR10445781	ERX9970414	PRJEB57190	ERP142158	2d1f7b73cff286a20c1a220a8d882bb1	1ba7d328f8210697b6ea9c8d1c45b28c	72852834	SAMEA9372118	SAMEA9372195	ERR10445792	ERX9970425	PRJEB57190	ERP142158
RainbowTrout	BodyMap	Liver	Mature	Female	SAMEA9372119	SAMEA9372200	ATAC-Seq	n.a.	3	B3134305	ERR10445775	ERX9970408	PRJEB57190	ERP142158	35a0440c933bac3312d64b93ca20077f	ef61716f5034804cb02087278f6ded9b	70306276	SAMEA9372119	SAMEA9372203	ERR10445763	ERX9970396	PRJEB57190	ERP142158
RainbowTrout	BodyMap	Muscle	Mature	Female	SAMEA9372119	SAMEA9372202	ATAC-Seq	n.a.	3	B3134306	ERR10445793	ERX9970426	PRJEB57190	ERP142158	eb1d1e5c6926ce933541712a8e69ce02	ec93c8c6bd879389369cbfcbf9137349	76948204	SAMEA9372119	SAMEA9372198	ERR10445781	ERX9970414	PRJEB57190	ERP142158
RainbowTrout	BodyMap	Brain	Mature	Male	SAMEA9372114	SAMEA9372175	ATAC-Seq	n.a.	1	B3143701	ERR10445758	ERX9970391	PRJEB57190	ERP142158	742f9619cf24fc1c0f05135d5a47a748	b60f73cf5bfa18815379d2ee7d41ace7	70746672	SAMEA9372119	SAMEA9372200	ERR10445775	ERX9970408	PRJEB57190	ERP142158
RainbowTrout	BodyMap	Liver	Mature	Male	SAMEA9372114	SAMEA9372172	ATAC-Seq	n.a.	1	B3143705	ERR10445770	ERX9970403	PRJEB57190	ERP142158	b7b724c3faa5cb0ba90a81006c8a009f	f48a538a605b70f7668867e3b43ffb5e	108960904	SAMEA9372119	SAMEA9372202	ERR10445793	ERX9970426	PRJEB57190	ERP142158
RainbowTrout	BodyMap	Muscle	Mature	Male	SAMEA9372114	SAMEA9372174	ATAC-Seq	n.a.	1	B3143706	ERR10445788	ERX9970421	PRJEB57190	ERP142158	4b4aa85f6e9ee1a134d2d546c98fe2f9	17d759a092a7fbc970a4ca449fdd3399	61098402	SAMEA9372114	SAMEA9372175	ERR10445758	ERX9970391	PRJEB57190	ERP142158
RainbowTrout	BodyMap	Brain	Mature	Male	SAMEA9372115	SAMEA9372182	ATAC-Seq	n.a.	2	B3143801	ERR10445759	ERX9970392	PRJEB57190	ERP142158	837d07417864bfdd4393ed384ca0ced0	a8f2b401fcf8d55bd8bb337d87f21821	97853388	SAMEA9372114	SAMEA9372172	ERR10445770	ERX9970403	PRJEB57190	ERP142158
RainbowTrout	BodyMap	Liver	Mature	Male	SAMEA9372115	SAMEA9372179	ATAC-Seq	n.a.	2	B3143805	ERR10445771	ERX9970404	PRJEB57190	ERP142158	9bc00430c3642247bff5cd332aa69476	e695163de23e789718e022f9ed5ab57a	94007468	SAMEA9372114	SAMEA9372174	ERR10445788	ERX9970421	PRJEB57190	ERP142158
RainbowTrout	BodyMap	Muscle	Mature	Male	SAMEA9372115	SAMEA9372181	ATAC-Seq	n.a.	2	B3143806	ERR10445789	ERX9970422	PRJEB57190	ERP142158	d2b275344c9de4d717b5b22d76dc0ae7	1bc8f267f3fbad07e988b1a55db77e8c	71476476	SAMEA9372115	SAMEA9372182	ERR10445759	ERX9970392	PRJEB57190	ERP142158
RainbowTrout	BodyMap	Brain	Mature	Male	SAMEA9372116	SAMEA9372168	ATAC-Seq	n.a.	3	B3144001	ERR10445760	ERX9970393	PRJEB57190	ERP142158	60627f839f3ce9f0dab9ca8d6a342dec	25b0db9a95ca620f4105b9b0624f8719	79536448	SAMEA9372115	SAMEA9372179	ERR10445771	ERX9970404	PRJEB57190	ERP142158
RainbowTrout	BodyMap	Liver	Mature	Male	SAMEA9372116	SAMEA9372165	ATAC-Seq	n.a.	3	B3144005	ERR10445772	ERX9970405	PRJEB57190	ERP142158	0a95474aa41e7fea3fc70086e1397506	1fe498402d5dc3f8a27f2717f214cf72	86390378	SAMEA9372115	SAMEA9372181	ERR10445789	ERX9970422	PRJEB57190	ERP142158
RainbowTrout	BodyMap	Muscle	Mature	Male	SAMEA9372116	SAMEA9372167	ATAC-Seq	n.a.	3	B3144006	ERR10445790	ERX9970423	PRJEB57190	ERP142158	8264f9057ff6be9e799501f472b0852f	1314da10c2998d12d5ae94f9057c54f1	81206928	SAMEA9372116	SAMEA9372168	ERR10445760	ERX9970393	PRJEB57190	ERP142158
RainbowTrout	BodyMap	Gonad	Mature	Male	SAMEA14200976	SAMEA14200982	ATAC-Seq	n.a.	1	B3144703	ERR10445803	ERX9970436	PRJEB57190	ERP142158	b147f0807ec504ba18db4f922c73b1d8	915a9bc6e50675043ad8375c7caa276e	68379924	SAMEA9372116	SAMEA9372165	ERR10445772	ERX9970405	PRJEB57190	ERP142158
RainbowTrout	BodyMap	Gonad	Mature	Male	SAMEA14200977	SAMEA14200983	ATAC-Seq	n.a.	2	B3144803	ERR10445804	ERX9970437	PRJEB57190	ERP142158	117394a4810ccb0cc85cce60f2730369	1d028623d39e9494546ef8070792d23d	89527832	SAMEA9372116	SAMEA9372167	ERR10445790	ERX9970423	PRJEB57190	ERP142158
RainbowTrout	BodyMap	Gonad	Mature	Male	SAMEA14200978	SAMEA14200984	ATAC-Seq	n.a.	3	B3144903	ERR10445805	ERX9970438	PRJEB57190	ERP142158	2924e535f40275e8b503a1c7797c7ecf	a2511c1e8cd200306a9c89da4408e5c1	98567154	SAMEA14200976	SAMEA14200982	ERR10445803	ERX9970436	PRJEB57190	ERP142158
RainbowTrout	BodyMap	Liver	Immature	Female	SAMEA9372097	SAMEA9372128	ChIP-Seq	H3K27ac	1	B3210425	ERR10556313	ERX10070008	PRJEB57956	ERP142973	6d01ed3f817eaf7a112137e014561bc7	1ec4ff28564bdefeec03f285b53bdd10	112042372	SAMEA14200977	SAMEA14200983	ERR10445804	ERX9970437	PRJEB57190	ERP142158
RainbowTrout	BodyMap	Liver	Immature	Female	SAMEA9372097	SAMEA9372128	ChIP-Seq	H3K27me3	1	B3210435	ERR10556394	ERX10070089	PRJEB57956	ERP142973	1d8938fb62824b5dbde1bbc9ece3d527	50305c8cdf437b5a5683309fc1e0c57a	130130508	SAMEA14200978	SAMEA14200984	ERR10445805	ERX9970438	PRJEB57190	ERP142158
RainbowTrout	BodyMap	Liver	Immature	Female	SAMEA9372097	SAMEA9372128	ChIP-Seq	H3K4me1	1	B3210445	ERR10556314	ERX10070009	PRJEB57956	ERP142973	a57517c7adbee23b0239ca558dc6e019	f9eaca9636ea8ac1acb5604ae9cfea58	106992114	SAMEA9372097	SAMEA9372128	ERR10556313	ERX10070008	PRJEB57956	ERP142973
RainbowTrout	BodyMap	Liver	Immature	Female	SAMEA9372097	SAMEA9372128	ChIP-Seq	H3K4me3	1	B3210455	ERR10556315	ERX10070010	PRJEB57956	ERP142973	2d50a20122a24441020adab00192c18a	148a698e48daeb2a9a871fa0bef4460f	107793452	SAMEA9372097	SAMEA9372128	ERR10556394	ERX10070089	PRJEB57956	ERP142973
RainbowTrout	BodyMap	Liver	Immature	Female		SAMEA14201010	ChIP-Seq	Input	1	B3210465	ERR10556380	ERX10070075	PRJEB57956	ERP142973	ab4f47ca01cfb23f5bd218a9ce558f77	18273f0ca03ae710922d451305fc10e2	190432906		SAMEA9372128	ERR10556314	ERX10070009	PRJEB57956	ERP142973
RainbowTrout	BodyMap	Liver	Immature	Female	SAMEA9372098	SAMEA9372133	ChIP-Seq	H3K27ac	2	B3210525	ERR10556395	ERX10070090	PRJEB57956	ERP142973	113d7aff7f9c820831ce5d30a9a5a8d7	b09e21dfef2184b2694eb666f6173551	120981390	SAMEA9372097	SAMEA9372128	ERR10556315	ERX10070010	PRJEB57956	ERP142973
RainbowTrout	BodyMap	Liver	Immature	Female	SAMEA9372098	SAMEA9372133	ChIP-Seq	H3K27me3	2	B3210535	ERR10556316	ERX10070011	PRJEB57956	ERP142973	73d09e8158afa55ac2474e61cb1d0755	500b3be4e943b61a0953b52f1fe5f458	112232862	https://www.ebi.ac.uk/biosamples/samples/	SAMEA14201010	ERR10556380	ERX10070075	PRJEB57956	ERP142973
RainbowTrout	BodyMap	Liver	Immature	Female	SAMEA9372098	SAMEA9372133	ChIP-Seq	H3K4me1	2	B3210545	ERR10556391	ERX10070086	PRJEB57956	ERP142973	3967731b259999c2297861d5b23d4586	5abed143eda0402263a603fb3a1416e1	92253520	SAMEA9372098	SAMEA9372133	ERR10556395	ERX10070090	PRJEB57956	ERP142973
RainbowTrout	BodyMap	Liver	Immature	Female	SAMEA9372098	SAMEA9372133	ChIP-Seq	H3K4me3	2	B3210555	ERR10556317	ERX10070012	PRJEB57956	ERP142973	bb76cb066636c41b03b7a19bfe32fc0f	5a1cdc664eb848eb75d8d6db6332e2e9	132738824	SAMEA9372098	SAMEA9372133	ERR10556316	ERX10070011	PRJEB57956	ERP142973
RainbowTrout	BodyMap	Brain	Immature	Female	SAMEA9372106	SAMEA9372154	ChIP-Seq	H3K27ac	1	B3211721	ERR10802320	ERX10250815	PRJEB57956	ERP142973	8732872fb150241ea552b30c2c35c919	98fb5cf733e5bd8fc123bd115e4adf03	103548438	SAMEA9372098	SAMEA9372133	ERR10556391	ERX10070086	PRJEB57956	ERP142973
RainbowTrout	BodyMap	Brain	Immature	Female	SAMEA9372106	SAMEA9372154	ChIP-Seq	H3K27me3	1	B3211731	ERR10556440	ERX10070135	PRJEB57956	ERP142973	d84b74591beeb92089bf8d184782390e	0bf424c07e76e6fe50876fac0bd70d1f	98344964	SAMEA9372098	SAMEA9372133	ERR10556317	ERX10070012	PRJEB57956	ERP142973
RainbowTrout	BodyMap	Brain	Immature	Female	SAMEA9372106	SAMEA9372154	ChIP-Seq	H3K4me1	1	B3211741	ERR10556437	ERX10070132	PRJEB57956	ERP142973	f87623a33b9bfca54908f39c356dbb29	13e36f9b87d9bd1253e1c169182548f3	114364850	SAMEA9372106	SAMEA9372154	ERR10802320	ERX10250815	PRJEB57956	ERP142973
RainbowTrout	BodyMap	Brain	Immature	Female	SAMEA9372106	SAMEA9372154	ChIP-Seq	H3K4me3	1	B3211751	ERR10556438	ERX10070133	PRJEB57956	ERP142973	1e07d137f895a65193066b9ae4695eb0	a222b010058e3c23008b0828285a5128	90700986	SAMEA9372106	SAMEA9372154	ERR10556440	ERX10070135	PRJEB57956	ERP142973
RainbowTrout	BodyMap	Brain	Immature	Female	SAMEA111397762	SAMEA111397776	ChIP-Seq	Input	1	B3211761	ERR10556464	ERX10070159	PRJEB57956	ERP142973	17eb60a8488efc51e8bc4a632236a9cf	72e94cb78f79434a136f53ade74961cd	109830578	SAMEA9372106	SAMEA9372154	ERR10556437	ERX10070132	PRJEB57956	ERP142973
RainbowTrout	BodyMap	Muscle	Immature	Female	SAMEA9372109	SAMEA9372157	ChIP-Seq	H3K27ac	1	B3213026	ERR10556403	ERX10070098	PRJEB57956	ERP142973	57d9df9d885002c81fe68c4831013457	6532eee119e72752825a00f572ec3830	99856324	SAMEA9372106	SAMEA9372154	ERR10556438	ERX10070133	PRJEB57956	ERP142973
RainbowTrout	BodyMap	Muscle	Immature	Female	SAMEA9372109	SAMEA9372157	ChIP-Seq	H3K27me3	1	B3213036	ERR10556404	ERX10070099	PRJEB57956	ERP142973	3be8eb9d4b445aec6ddef3646d6f42e6	1d272d1936b1da3039dfca4638503568	110177586	SAMEA111397762	SAMEA111397776	ERR10556464	ERX10070159	PRJEB57956	ERP142973
RainbowTrout	BodyMap	Muscle	Immature	Female	SAMEA9372109	SAMEA9372157	ChIP-Seq	H3K4me1	1	B3213046	ERR10556405	ERX10070100	PRJEB57956	ERP142973	ca6873738741c9d10684a303d8866be2	14b7aef824ef737ca77de99e78e46629	105046546	SAMEA9372109	SAMEA9372157	ERR10556403	ERX10070098	PRJEB57956	ERP142973
RainbowTrout	BodyMap	Muscle	Immature	Female	SAMEA9372109	SAMEA9372157	ChIP-Seq	H3K4me3	1	B3213056	ERR10556335	ERX10070030	PRJEB57956	ERP142973	c5062ed00d77c8315c3c13715b092cae	022c6fe127404ef77eaaf13a7a9910b9	98085934	SAMEA9372109	SAMEA9372157	ERR10556404	ERX10070099	PRJEB57956	ERP142973
RainbowTrout	BodyMap	Muscle	Immature	Female		SAMEA14201014	ChIP-Seq	Input	1	B3213066	ERR10802318	ERX10250813	PRJEB57956	ERP142973	49c6958ec8e831852a0dd35b5297f708	a120b8ff47ca2ff8eab004bae68ce2dc	201922656		SAMEA9372157	ERR10556405	ERX10070100	PRJEB57956	ERP142973
RainbowTrout	BodyMap	Muscle	Immature	Female	SAMEA9372110	SAMEA9372158	ChIP-Seq	H3K27ac	2	B3213126	ERR10556336	ERX10070031	PRJEB57956	ERP142973	f5ccd98e60f319227cfd242d6b601413	b2e2353d381f9b58aee15e6ea6a19d6e	150143860	SAMEA9372109	SAMEA9372157	ERR10556335	ERX10070030	PRJEB57956	ERP142973
RainbowTrout	BodyMap	Muscle	Immature	Female	SAMEA9372110	SAMEA9372158	ChIP-Seq	H3K27me3	2	B3213136	ERR10556337	ERX10070032	PRJEB57956	ERP142973	d2b464317eb7f2f430411c6bd14b9f8c	4ac31f2f051e9fbcb47b965a19477504	105886210	https://www.ebi.ac.uk/biosamples/samples/	SAMEA14201014	ERR10802318	ERX10250813	PRJEB57956	ERP142973
RainbowTrout	BodyMap	Muscle	Immature	Female	SAMEA9372110	SAMEA9372158	ChIP-Seq	H3K4me1	2	B3213146	ERR10556338	ERX10070033	PRJEB57956	ERP142973	048567d30f00c1f16e4523749451453c	22165ed38670745208e705c1e985c55c	166656658	SAMEA9372110	SAMEA9372158	ERR10556336	ERX10070031	PRJEB57956	ERP142973
RainbowTrout	BodyMap	Muscle	Immature	Female	SAMEA9372110	SAMEA9372158	ChIP-Seq	H3K4me3	2	B3213156	ERR10556339	ERX10070034	PRJEB57956	ERP142973	876a86a54eeb0dc58e87f6d9f512b060	39050aaf6493be7a3b0ac5f766cb5269	104601138	SAMEA9372110	SAMEA9372158	ERR10556337	ERX10070032	PRJEB57956	ERP142973
RainbowTrout	BodyMap	Liver	Immature	Male	SAMEA9372096	SAMEA9372123	ChIP-Seq	H3K27ac	1	B3220125	ERR10556309	ERX10070004	PRJEB57956	ERP142973	730dc2b1ab5cbd388172e20691d7ea42	be311931ddee36c27b8551e68a13f719	105535754	SAMEA9372110	SAMEA9372158	ERR10556338	ERX10070033	PRJEB57956	ERP142973
RainbowTrout	BodyMap	Liver	Immature	Male	SAMEA9372096	SAMEA9372123	ChIP-Seq	H3K27me3	1	B3220135	ERR10556310	ERX10070005	PRJEB57956	ERP142973	9ac54dffee6332846aaf9b0e97f56cd0	92ede8ffe90a4c253b69fbfc874ed56a	125770896	SAMEA9372110	SAMEA9372158	ERR10556339	ERX10070034	PRJEB57956	ERP142973
RainbowTrout	BodyMap	Liver	Immature	Male	SAMEA9372096	SAMEA9372123	ChIP-Seq	H3K4me1	1	B3220145	ERR10802313	ERX10250808	PRJEB57956	ERP142973	b09c8480328d1922e9a552c80c22d829	9f78a31a012ec58e7e84d176e5cf3e0a	143673214	SAMEA9372096	SAMEA9372123	ERR10556309	ERX10070004	PRJEB57956	ERP142973
RainbowTrout	BodyMap	Liver	Immature	Male	SAMEA9372096	SAMEA9372123	ChIP-Seq	H3K4me3	1	B3220155	ERR10556312	ERX10070007	PRJEB57956	ERP142973	a3f3a51822150051e21adcd3d6a85276	df523cadcd0ca9a22549ba5447be236e	98674610	SAMEA9372096	SAMEA9372123	ERR10556310	ERX10070005	PRJEB57956	ERP142973
RainbowTrout	BodyMap	Gill	Immature	Male		SAMEA14201017	ChIP-Seq	Input	1	B3220162	ERR10556387	ERX10070082	PRJEB57956	ERP142973	36d0e17b9d9ffb60d08689f3506fe864	2273355a06a6e66220f217ec8d82904b	278008654		SAMEA9372123	ERR10802313	ERX10250808	PRJEB57956	ERP142973	used for blacklist
RainbowTrout	BodyMap	Liver	Immature	Male		SAMEA14201009	ChIP-Seq	Input	1	B3220165	ERR10556379	ERX10070074	PRJEB57956	ERP142973	d80d1518a2b4832a28eb72a80129cc69	2ef093eb0103d7b7c7627dcd09c54889	192887364		SAMEA9372123	ERR10556312	ERX10070007	PRJEB57956	ERP142973
RainbowTrout	BodyMap	Liver	Immature	Male	SAMEA9372099	SAMEA9372138	ChIP-Seq	H3K27ac	2	B3220825	ERR10556318	ERX10070013	PRJEB57956	ERP142973	933e89183e6ca979e49aaf7129b853ef	da53d3f3aabd0fb8bfc5dc44dd706857	107659816	https://www.ebi.ac.uk/biosamples/samples/	SAMEA14201017	ERR10556387	ERX10070082	PRJEB57956	ERP142973
RainbowTrout	BodyMap	Liver	Immature	Male	SAMEA9372099	SAMEA9372138	ChIP-Seq	H3K27me3	2	B3220835	ERR10556396	ERX10070091	PRJEB57956	ERP142973	3ef2f854637dc5e480c0787b49eed42f	a265000b484b411da8db511f3361de1c	102182982	https://www.ebi.ac.uk/biosamples/samples/	SAMEA14201009	ERR10556379	ERX10070074	PRJEB57956	ERP142973
RainbowTrout	BodyMap	Liver	Immature	Male	SAMEA9372099	SAMEA9372138	ChIP-Seq	H3K4me1	2	B3220845	ERR10556319	ERX10070014	PRJEB57956	ERP142973	0e8c36243fe41459af82d9a0ab665341	91da22f47007eb41bad503702365f208	111579320	SAMEA9372099	SAMEA9372138	ERR10556318	ERX10070013	PRJEB57956	ERP142973
RainbowTrout	BodyMap	Liver	Immature	Male	SAMEA9372099	SAMEA9372138	ChIP-Seq	H3K4me3	2	B3220855	ERR10556320	ERX10070015	PRJEB57956	ERP142973	72d04513dc7081ed6fa1bfa11168d0bf	d550b7fcc419946fac4dcc03a1bb6e53	111844404	SAMEA9372099	SAMEA9372138	ERR10556396	ERX10070091	PRJEB57956	ERP142973
RainbowTrout	BodyMap	Brain	Immature	Male	SAMEA9372102	SAMEA9372150	ChIP-Seq	H3K27ac	1	B3221121	ERR10556435	ERX10070130	PRJEB57956	ERP142973	1251f487cf31176b64ed1a7fc4c86e1f	762e0578a7915563d98944bef3c4bb45	89805890	SAMEA9372099	SAMEA9372138	ERR10556319	ERX10070014	PRJEB57956	ERP142973
RainbowTrout	BodyMap	Brain	Immature	Male	SAMEA9372102	SAMEA9372150	ChIP-Seq	H3K27me3	1	B3221131	ERR10556436	ERX10070131	PRJEB57956	ERP142973	17b8d5bc810787061020fcca61592ea3	0bc15da73ca2eaaada56d37393d1e0ef	92131376	SAMEA9372099	SAMEA9372138	ERR10556320	ERX10070015	PRJEB57956	ERP142973
RainbowTrout	BodyMap	Brain	Immature	Male	SAMEA9372102	SAMEA9372150	ChIP-Seq	H3K4me1	1	B3221141	ERR10556433	ERX10070128	PRJEB57956	ERP142973	61f7a88dd4ef4a2d58dba8cb6b6bb9fa	f7a7f470579f140597cfe3ee820bc9f4	116429192	SAMEA9372102	SAMEA9372150	ERR10556435	ERX10070130	PRJEB57956	ERP142973
RainbowTrout	BodyMap	Brain	Immature	Male	SAMEA9372102	SAMEA9372150	ChIP-Seq	H3K4me3	1	B3221151	ERR10556434	ERX10070129	PRJEB57956	ERP142973	8ea35f347d31f69f68d407c651959dfa	9d21456f877723bf3c146ca9037a94c8	93221030	SAMEA9372102	SAMEA9372150	ERR10556436	ERX10070131	PRJEB57956	ERP142973
RainbowTrout	BodyMap	Brain	Immature	Male	SAMEA111397761	SAMEA111397775	ChIP-Seq	Input	1	B3221161	ERR10556463	ERX10070158	PRJEB57956	ERP142973	f7ef1abf7e0e694e699cdefe56058947	9a1bbaad9edc24e475c984d47e7f6156	94276016	SAMEA9372102	SAMEA9372150	ERR10556433	ERX10070128	PRJEB57956	ERP142973
RainbowTrout	BodyMap	Muscle	Immature	Male	SAMEA9372108	SAMEA9372156	ChIP-Seq	H3K27ac	1	B3222826	ERR10556400	ERX10070095	PRJEB57956	ERP142973	37e027fd0117d16cef6f515eeb63d996	d6ca190dcd365be81e2f6b74ecc719c0	104740046	SAMEA9372102	SAMEA9372150	ERR10556434	ERX10070129	PRJEB57956	ERP142973
RainbowTrout	BodyMap	Muscle	Immature	Male	SAMEA9372108	SAMEA9372156	ChIP-Seq	H3K27me3	1	B3222836	ERR10556401	ERX10070096	PRJEB57956	ERP142973	848c019396bebcfb4270d3ed2c1bce52	f49646c293edafb4ba27581460fdf6e6	115735388	SAMEA111397761	SAMEA111397775	ERR10556463	ERX10070158	PRJEB57956	ERP142973
RainbowTrout	BodyMap	Muscle	Immature	Male	SAMEA9372108	SAMEA9372156	ChIP-Seq	H3K4me1	1	B3222846	ERR10556402	ERX10070097	PRJEB57956	ERP142973	3a3d28026077c2819f533ee6ce9e4672	826b6f06a75274be4005573365aaf242	98542362	SAMEA9372108	SAMEA9372156	ERR10556400	ERX10070095	PRJEB57956	ERP142973
RainbowTrout	BodyMap	Muscle	Immature	Male	SAMEA9372108	SAMEA9372156	ChIP-Seq	H3K4me3	1	B3222856	ERR10556334	ERX10070029	PRJEB57956	ERP142973	963ae2a5c462f5bf3044ce4dd9c9ab9d	7bc22aedb6f1bee73d30cc9d71a33f1b	107561306	SAMEA9372108	SAMEA9372156	ERR10556401	ERX10070096	PRJEB57956	ERP142973
RainbowTrout	BodyMap	Muscle	Immature	Male		SAMEA14201013	ChIP-Seq	Input	1	B3222866	ERR10556383	ERX10070078	PRJEB57956	ERP142973	b1b6f841563b56b3943a88950c6bf537	cdef483e70a44b5b934d70732ce4b8a4	248125506		SAMEA9372156	ERR10556402	ERX10070097	PRJEB57956	ERP142973
RainbowTrout	BodyMap	Muscle	Immature	Male	SAMEA9372112	SAMEA9372160	ChIP-Seq	H3K27ac	2	B3223426	ERR10556340	ERX10070035	PRJEB57956	ERP142973	2e533caf1938fd28ca00330c5a2f6ffd	8d00430b9d8f930635e1d3f1a89e2a07	112808952	SAMEA9372108	SAMEA9372156	ERR10556334	ERX10070029	PRJEB57956	ERP142973
RainbowTrout	BodyMap	Muscle	Immature	Male	SAMEA9372112	SAMEA9372160	ChIP-Seq	H3K27me3	2	B3223436	ERR10556341	ERX10070036	PRJEB57956	ERP142973	b6c885f83a061c03bbd730db83382f59	8a483466c683fb52d9b8edf99865e065	120018616	https://www.ebi.ac.uk/biosamples/samples/	SAMEA14201013	ERR10556383	ERX10070078	PRJEB57956	ERP142973
RainbowTrout	BodyMap	Muscle	Immature	Male	SAMEA9372112	SAMEA9372160	ChIP-Seq	H3K4me1	2	B3223446	ERR10556406	ERX10070101	PRJEB57956	ERP142973	b61ff815e32579c26c573a6aa2542d6c	89d98df9cfdf8689c4a69a7b13a92541	100697078	SAMEA9372112	SAMEA9372160	ERR10556340	ERX10070035	PRJEB57956	ERP142973
RainbowTrout	BodyMap	Muscle	Immature	Male	SAMEA9372112	SAMEA9372160	ChIP-Seq	H3K4me3	2	B3223456	ERR10556342	ERX10070037	PRJEB57956	ERP142973	0e53dcefae68ebc55450493d79b4e4f1	4ea6e0df88b2405acf8d727bf728066a	102869970	SAMEA9372112	SAMEA9372160	ERR10556341	ERX10070036	PRJEB57956	ERP142973
RainbowTrout	BodyMap	Gonad	Immature	Male	SAMEA111397753	SAMEA111397774	ChIP-Seq	Input	1	B3224563	ERR10556470	ERX10070165	PRJEB57956	ERP142973	1c4c6b2ed5170d395662d7258ba82cb7	c5d073dce4a33b8c0c0d2d6dafd26b03	189706112	SAMEA9372112	SAMEA9372160	ERR10556406	ERX10070101	PRJEB57956	ERP142973	used for blacklist
RainbowTrout	BodyMap	Brain	Mature	Female	SAMEA9372117	SAMEA9372189	ChIP-Seq	H3K27ac	1	B3234121	ERR10556431	ERX10070126	PRJEB57956	ERP142973	4ba2a0cfdee4fe4906177731b2c1b4c9	f1ff1cde7ba83e1c5518cb40e48439bb	97009506	SAMEA9372112	SAMEA9372160	ERR10556342	ERX10070037	PRJEB57956	ERP142973
RainbowTrout	BodyMap	Liver	Mature	Female	SAMEA9372117	SAMEA9372186	ChIP-Seq	H3K27ac	1	B3234125	ERR10556327	ERX10070022	PRJEB57956	ERP142973	df4de22bd8e2994cec8095b604ffd67a	20500ab519a08f3bc663e0ec26b206b4	96747090	SAMEA111397753	SAMEA111397774	ERR10556470	ERX10070165	PRJEB57956	ERP142973
RainbowTrout	BodyMap	Muscle	Mature	Female	SAMEA9372117	SAMEA9372188	ChIP-Seq	H3K27ac	1	B3234126	ERR10556349	ERX10070044	PRJEB57956	ERP142973	06691f8ff5357fbfdf0872898b6fa624	e5085352707b5a6d76ba3fca02c30e7d	98987698	SAMEA9372117	SAMEA9372189	ERR10556431	ERX10070126	PRJEB57956	ERP142973
RainbowTrout	BodyMap	Brain	Mature	Female	SAMEA9372117	SAMEA9372189	ChIP-Seq	H3K27me3	1	B3234131	ERR10556432	ERX10070127	PRJEB57956	ERP142973	d556987c2805d5ef53f50c2c7c6928f1	2110449dd618a08f3fb23582af0ac176	104622112	SAMEA9372117	SAMEA9372186	ERR10556327	ERX10070022	PRJEB57956	ERP142973
RainbowTrout	BodyMap	Liver	Mature	Female	SAMEA9372117	SAMEA9372186	ChIP-Seq	H3K27me3	1	B3234135	ERR10556399	ERX10070094	PRJEB57956	ERP142973	c4aa2bbb9e5eade9fed0adb835af3fa6	7d7392c6954592b38aa957c1367cc7e2	98407972	SAMEA9372117	SAMEA9372188	ERR10556349	ERX10070044	PRJEB57956	ERP142973
RainbowTrout	BodyMap	Muscle	Mature	Female	SAMEA9372117	SAMEA9372188	ChIP-Seq	H3K27me3	1	B3234136	ERR10556350	ERX10070045	PRJEB57956	ERP142973	b5ff6590d1346408ab1537b89a5cede2	4fbf849e9dfc5bcd7856fd88de7a3e4d	113136898	SAMEA9372117	SAMEA9372189	ERR10556432	ERX10070127	PRJEB57956	ERP142973
RainbowTrout	BodyMap	Brain	Mature	Female	SAMEA9372117	SAMEA9372189	ChIP-Seq	H3K4me1	1	B3234141	ERR10556429	ERX10070124	PRJEB57956	ERP142973	51142d570787ea072e69bdbfc368cfc8	c7d5457ca9a6426eeebe8845729ff4ef	99958872	SAMEA9372117	SAMEA9372186	ERR10556399	ERX10070094	PRJEB57956	ERP142973
RainbowTrout	BodyMap	Liver	Mature	Female	SAMEA9372117	SAMEA9372186	ChIP-Seq	H3K4me1	1	B3234145	ERR10556328	ERX10070023	PRJEB57956	ERP142973	3842d03f750e55d26672602d9a0e8a82	390b2d4e9366ce814522fc3a47dadab1	106154742	SAMEA9372117	SAMEA9372188	ERR10556350	ERX10070045	PRJEB57956	ERP142973
RainbowTrout	BodyMap	Muscle	Mature	Female	SAMEA9372117	SAMEA9372188	ChIP-Seq	H3K4me1	1	B3234146	ERR10556351	ERX10070046	PRJEB57956	ERP142973	f51c30506f3c8d1c5ab01cb795b0158d	fa601786339fe70906e5a8233b8843dd	112815214	SAMEA9372117	SAMEA9372189	ERR10556429	ERX10070124	PRJEB57956	ERP142973
RainbowTrout	BodyMap	Brain	Mature	Female	SAMEA9372117	SAMEA9372189	ChIP-Seq	H3K4me3	1	B3234151	ERR10556430	ERX10070125	PRJEB57956	ERP142973	e7d4b83eff191aa7d2b22f92a4f100f3	2f139054b9ca3fd1d9ddffd70f4c87eb	96692530	SAMEA9372117	SAMEA9372186	ERR10556328	ERX10070023	PRJEB57956	ERP142973
RainbowTrout	BodyMap	Liver	Mature	Female	SAMEA9372117	SAMEA9372186	ChIP-Seq	H3K4me3	1	B3234155	ERR10556329	ERX10070024	PRJEB57956	ERP142973	e8f9c47ff19622319ebc7a569bcab0b2	0b3da0346eecf8d86c61fc1ffa774487	116053920	SAMEA9372117	SAMEA9372188	ERR10556351	ERX10070046	PRJEB57956	ERP142973
RainbowTrout	BodyMap	Muscle	Mature	Female	SAMEA9372117	SAMEA9372188	ChIP-Seq	H3K4me3	1	B3234156	ERR10802316	ERX10250811	PRJEB57956	ERP142973	0c5857f534438af6995fcc0a67052a3d	7ab16275339b52d3a1ede8e351b34f56	253924500	SAMEA9372117	SAMEA9372189	ERR10556430	ERX10070125	PRJEB57956	ERP142973
RainbowTrout	BodyMap	Gill	Mature	Female		SAMEA14201020	ChIP-Seq	Input	1	B3234162	ERR10556390	ERX10070085	PRJEB57956	ERP142973	573d48426545606f13b4095d05cddaff	fb13c92163602a1023bb99c88dd043c2	192291562		SAMEA9372186	ERR10556329	ERX10070024	PRJEB57956	ERP142973	used for blacklist
RainbowTrout	BodyMap	Gonad	Mature	Female		SAMEA111397771	ChIP-Seq	Input	1	B3234163	ERR10802321	ERX10250816	PRJEB57956	ERP142973	f9758779b6a90ff98f6a778a7b137bc4	8e2d45f393db2c7b3746dced76f36bdf	238330528		SAMEA9372188	ERR10802316	ERX10250811	PRJEB57956	ERP142973	used for blacklist
RainbowTrout	BodyMap	Liver	Mature	Female		SAMEA14201012	ChIP-Seq	Input	1	B3234165	ERR10556382	ERX10070077	PRJEB57956	ERP142973	7eced88346b453c6c9067bfa25e37219	80326fef2a933e337405e1de53b4799c	188986816		SAMEA14201020	ERR10556390	ERX10070085	PRJEB57956	ERP142973
RainbowTrout	BodyMap	Muscle	Mature	Female		SAMEA14201016	ChIP-Seq	Input	1	B3234166	ERR10556386	ERX10070081	PRJEB57956	ERP142973	9cf2e911cb2492d1974a6c975c55a72d	a4ba876d67c7248e62211205498ffb9a	191599588		SAMEA111397771	ERR10802321	ERX10250816	PRJEB57956	ERP142973
RainbowTrout	BodyMap	Brain	Mature	Female	SAMEA9372118	SAMEA9372196	ChIP-Seq	H3K27ac	2	B3234221	ERR10556419	ERX10070114	PRJEB57956	ERP142973	de42d58ce70ad1a11f6f0e37fd15ea32	fe3d5b31d7a833b1f59f0f4929f9b579	95973298	https://www.ebi.ac.uk/biosamples/samples/	SAMEA14201012	ERR10556382	ERX10070077	PRJEB57956	ERP142973
RainbowTrout	BodyMap	Liver	Mature	Female	SAMEA9372118	SAMEA9372193	ChIP-Seq	H3K27ac	2	B3234225	ERR10556330	ERX10070025	PRJEB57956	ERP142973	d5199420b70292675c8d6618ade986ae	d34c70f48781f530efc72ab7be7102da	161006556	https://www.ebi.ac.uk/biosamples/samples/	SAMEA14201016	ERR10556386	ERX10070081	PRJEB57956	ERP142973
RainbowTrout	BodyMap	Muscle	Mature	Female	SAMEA9372118	SAMEA9372195	ChIP-Seq	H3K27ac	2	B3234226	ERR10556353	ERX10070048	PRJEB57956	ERP142973	9c0015fb39d255dcbd2af780404922ff	8f2b390f18bb12f9a94c83f5662e787f	106695286	SAMEA9372118	SAMEA9372196	ERR10556419	ERX10070114	PRJEB57956	ERP142973
RainbowTrout	BodyMap	Brain	Mature	Female	SAMEA9372118	SAMEA9372196	ChIP-Seq	H3K27me3	2	B3234231	ERR10556420	ERX10070115	PRJEB57956	ERP142973	761f0ac453245cfafbe0d59ba7239c8c	ba99e1f08aaf6b818b20653f4cdbf634	104286160	SAMEA9372118	SAMEA9372193	ERR10556330	ERX10070025	PRJEB57956	ERP142973
RainbowTrout	BodyMap	Liver	Mature	Female	SAMEA9372118	SAMEA9372193	ChIP-Seq	H3K27me3	2	B3234235	ERR10556331	ERX10070026	PRJEB57956	ERP142973	ffab940e63388e17d59083e28e942645	5a8a6f03d9bf345ea23d60794c45388a	135326850	SAMEA9372118	SAMEA9372195	ERR10556353	ERX10070048	PRJEB57956	ERP142973
RainbowTrout	BodyMap	Muscle	Mature	Female	SAMEA9372118	SAMEA9372195	ChIP-Seq	H3K27me3	2	B3234236	ERR10556354	ERX10070049	PRJEB57956	ERP142973	a1dce68e84cb3e3498a52f8e78041166	2067f7eb2537d0780b11e5a4911f5c80	97339766	SAMEA9372118	SAMEA9372196	ERR10556420	ERX10070115	PRJEB57956	ERP142973
RainbowTrout	BodyMap	Brain	Mature	Female	SAMEA9372118	SAMEA9372196	ChIP-Seq	H3K4me1	2	B3234241	ERR10802319	ERX10250814	PRJEB57956	ERP142973	156e80c49605af9f839f4ddad04983dd	503726d6994d968a040fa86bc21e13c9	99971828	SAMEA9372118	SAMEA9372193	ERR10556331	ERX10070026	PRJEB57956	ERP142973
RainbowTrout	BodyMap	Liver	Mature	Female	SAMEA9372118	SAMEA9372193	ChIP-Seq	H3K4me1	2	B3234245	ERR10802314	ERX10250809	PRJEB57956	ERP142973	7c5082b72dad18f257a289b3f520cf94	b72165c6d5db20a8511d6b8aee13cbc6	131146832	SAMEA9372118	SAMEA9372195	ERR10556354	ERX10070049	PRJEB57956	ERP142973
RainbowTrout	BodyMap	Muscle	Mature	Female	SAMEA9372118	SAMEA9372195	ChIP-Seq	H3K4me1	2	B3234246	ERR10556355	ERX10070050	PRJEB57956	ERP142973	69cdcbba65356323e534c083d4eacd5e	8668d6d5bf05220a8f2375de3f06d702	98084698	SAMEA9372118	SAMEA9372196	ERR10802319	ERX10250814	PRJEB57956	ERP142973
RainbowTrout	BodyMap	Brain	Mature	Female	SAMEA9372118	SAMEA9372196	ChIP-Seq	H3K4me3	2	B3234251	ERR10556418	ERX10070113	PRJEB57956	ERP142973	f6e7ce5272387a47b138b99972891991	5cf3e1ef9b78fae706b4babb5eb1bc95	96091162	SAMEA9372118	SAMEA9372193	ERR10802314	ERX10250809	PRJEB57956	ERP142973
RainbowTrout	BodyMap	Liver	Mature	Female	SAMEA9372118	SAMEA9372193	ChIP-Seq	H3K4me3	2	B3234255	ERR10556333	ERX10070028	PRJEB57956	ERP142973	ca1d3c3f54fc5260f2413a4b8cdcdfa4	3ac85e9fbebbd3fb6edf1e8b30789f8c	136013066	SAMEA9372118	SAMEA9372195	ERR10556355	ERX10070050	PRJEB57956	ERP142973
RainbowTrout	BodyMap	Muscle	Mature	Female	SAMEA9372118	SAMEA9372195	ChIP-Seq	H3K4me3	2	B3234256	ERR10556356	ERX10070051	PRJEB57956	ERP142973	6caf0c0039494aa048ce269f5bf77003	780cba642a4bbe7f0b4a0d6692035660	109801580	SAMEA9372118	SAMEA9372196	ERR10556418	ERX10070113	PRJEB57956	ERP142973
RainbowTrout	BodyMap	Brain	Mature	Female		SAMEA111397770	ChIP-Seq	Input	1	B3234261	ERR10556466	ERX10070161	PRJEB57956	ERP142973	9963fc2e83501a03ce9951b8fe4ca6de	bd390fda48d102d10848d26fec44b4cb	223604130		SAMEA9372193	ERR10556333	ERX10070028	PRJEB57956	ERP142973
RainbowTrout	BodyMap	Brain	Mature	Male	SAMEA9372114	SAMEA9372175	ChIP-Seq	H3K27ac	1	B3243721	ERR10556423	ERX10070118	PRJEB57956	ERP142973	77a01cbc4d65a5efb3f1ce969d108131	ba8a2d04f7c95d457518439713fddf7e	116753930	SAMEA9372118	SAMEA9372195	ERR10556356	ERX10070051	PRJEB57956	ERP142973
RainbowTrout	BodyMap	Liver	Mature	Male	SAMEA9372114	SAMEA9372172	ChIP-Seq	H3K27ac	1	B3243725	ERR10556321	ERX10070016	PRJEB57956	ERP142973	5ce9d47690bb8ecbf6bcf72cd9b307a4	dfda26e0bd09d473c78a108bd802c3a1	128327882	https://www.ebi.ac.uk/biosamples/samples/	SAMEA111397770	ERR10556466	ERX10070161	PRJEB57956	ERP142973
RainbowTrout	BodyMap	Muscle	Mature	Male	SAMEA9372114	SAMEA9372174	ChIP-Seq	H3K27ac	1	B3243726	ERR10556407	ERX10070102	PRJEB57956	ERP142973	6a75d0272e11b9eb6687d5ba18989460	1cc1617442e51ed77c311a6aeb4a0a8b	112652678	SAMEA9372114	SAMEA9372175	ERR10556423	ERX10070118	PRJEB57956	ERP142973
RainbowTrout	BodyMap	Brain	Mature	Male	SAMEA9372114	SAMEA9372175	ChIP-Seq	H3K27me3	1	B3243731	ERR10556424	ERX10070119	PRJEB57956	ERP142973	b1fe358514ffec7899079eda75c833c4	7057a5279500d30cdba3ab9f23ac31fc	94490032	SAMEA9372114	SAMEA9372172	ERR10556321	ERX10070016	PRJEB57956	ERP142973
RainbowTrout	BodyMap	Liver	Mature	Male	SAMEA9372114	SAMEA9372172	ChIP-Seq	H3K27me3	1	B3243735	ERR10556322	ERX10070017	PRJEB57956	ERP142973	f897a566127972f4735dbfa3383cf1e9	45e5dd5b489677217281205a555daa07	114464182	SAMEA9372114	SAMEA9372174	ERR10556407	ERX10070102	PRJEB57956	ERP142973
RainbowTrout	BodyMap	Muscle	Mature	Male	SAMEA9372114	SAMEA9372174	ChIP-Seq	H3K27me3	1	B3243736	ERR10556343	ERX10070038	PRJEB57956	ERP142973	e8688ffd4987e9b37de92d63c1ed10d5	ae3eb35a46f05c029de29964ddc68ea7	106320200	SAMEA9372114	SAMEA9372175	ERR10556424	ERX10070119	PRJEB57956	ERP142973
RainbowTrout	BodyMap	Brain	Mature	Male	SAMEA9372114	SAMEA9372175	ChIP-Seq	H3K4me1	1	B3243741	ERR10556421	ERX10070116	PRJEB57956	ERP142973	5e99e5cbf955c75ba0602521850e95f9	877626fd502ec94698c46e05c44c9e54	97641794	SAMEA9372114	SAMEA9372172	ERR10556322	ERX10070017	PRJEB57956	ERP142973
RainbowTrout	BodyMap	Liver	Mature	Male	SAMEA9372114	SAMEA9372172	ChIP-Seq	H3K4me1	1	B3243745	ERR10556323	ERX10070018	PRJEB57956	ERP142973	060dc8c7cd41f901aee6c7aecccabf43	e23a7bfe7358d26e62114f4920254374	102569002	SAMEA9372114	SAMEA9372174	ERR10556343	ERX10070038	PRJEB57956	ERP142973
RainbowTrout	BodyMap	Muscle	Mature	Male	SAMEA9372114	SAMEA9372174	ChIP-Seq	H3K4me1	1	B3243746	ERR10556408	ERX10070103	PRJEB57956	ERP142973	870102b5e016941279ade4a358001bba	6792ada34b28829a2b51d97f6000aa67	104171306	SAMEA9372114	SAMEA9372175	ERR10556421	ERX10070116	PRJEB57956	ERP142973
RainbowTrout	BodyMap	Brain	Mature	Male	SAMEA9372114	SAMEA9372175	ChIP-Seq	H3K4me3	1	B3243751	ERR10556422	ERX10070117	PRJEB57956	ERP142973	ab347662531b5a0a6b1adf73f8bdbcc0	2331988b4854f69cd91fc2746016f0e3	99097832	SAMEA9372114	SAMEA9372172	ERR10556323	ERX10070018	PRJEB57956	ERP142973
RainbowTrout	BodyMap	Liver	Mature	Male	SAMEA9372114	SAMEA9372172	ChIP-Seq	H3K4me3	1	B3243755	ERR10556324	ERX10070019	PRJEB57956	ERP142973	155a5969d782da23502cf7cbaf7910df	9d695ae61c0a44f0bf1590f1712a099e	117512996	SAMEA9372114	SAMEA9372174	ERR10556408	ERX10070103	PRJEB57956	ERP142973
RainbowTrout	BodyMap	Muscle	Mature	Male	SAMEA9372114	SAMEA9372174	ChIP-Seq	H3K4me3	1	B3243756	ERR10556344	ERX10070039	PRJEB57956	ERP142973	7bc8710b4807bfbb5f633c42df26c5e2	176f8f034b90f0cc33857c1e3e425a71	107400622	SAMEA9372114	SAMEA9372175	ERR10556422	ERX10070117	PRJEB57956	ERP142973
RainbowTrout	BodyMap	Brain	Mature	Male		SAMEA111397769	ChIP-Seq	Input	1	B3243761	ERR10556465	ERX10070160	PRJEB57956	ERP142973	15d9edbe76d8492bc876f45a6aed15d8	9ea5b5606bedb64c9901cfde2f9c4ec7	234718560		SAMEA9372172	ERR10556324	ERX10070019	PRJEB57956	ERP142973
RainbowTrout	BodyMap	Gill	Mature	Male		SAMEA14201019	ChIP-Seq	Input	1	B3243762	ERR10556389	ERX10070084	PRJEB57956	ERP142973	68d8b64dbfbc9e3fb7ee371ec5e1412a	22d2dcb1e25adb599ab2fe7c28e13e40	190165752		SAMEA9372174	ERR10556344	ERX10070039	PRJEB57956	ERP142973	used for blacklist
RainbowTrout	BodyMap	Liver	Mature	Male		SAMEA14201011	ChIP-Seq	Input	1	B3243765	ERR10556381	ERX10070076	PRJEB57956	ERP142973	31e1c77fe3c652ffd8ba05901459f0ae	115d609d24bac4abc23da67f76a1f795	194358886		SAMEA111397769	ERR10556465	ERX10070160	PRJEB57956	ERP142973
RainbowTrout	BodyMap	Muscle	Mature	Male		SAMEA14201015	ChIP-Seq	Input	1	B3243766	ERR10556385	ERX10070080	PRJEB57956	ERP142973	7e4c80deebd0d272638576c693842137	99bbc63f68c5e556d9cf2267254cea45	193600942		SAMEA14201019	ERR10556389	ERX10070084	PRJEB57956	ERP142973
RainbowTrout	BodyMap	Brain	Mature	Male	SAMEA9372115	SAMEA9372182	ChIP-Seq	H3K27ac	2	B3243821	ERR10556427	ERX10070122	PRJEB57956	ERP142973	37d6a660c7408eaf0548d001153b52d0	8e64f4d35b8a61e0d8546905dcff3808	90132200	https://www.ebi.ac.uk/biosamples/samples/	SAMEA14201011	ERR10556381	ERX10070076	PRJEB57956	ERP142973
RainbowTrout	BodyMap	Liver	Mature	Male	SAMEA9372115	SAMEA9372179	ChIP-Seq	H3K27ac	2	B3243825	ERR10556325	ERX10070020	PRJEB57956	ERP142973	c7d472d0ae328b177d259913c7eeb834	19cc552dd71d6aeb725073ba976f39f4	97648526	https://www.ebi.ac.uk/biosamples/samples/	SAMEA14201015	ERR10556385	ERX10070080	PRJEB57956	ERP142973
RainbowTrout	BodyMap	Muscle	Mature	Male	SAMEA9372115	SAMEA9372181	ChIP-Seq	H3K27ac	2	B3243826	ERR10556345	ERX10070040	PRJEB57956	ERP142973	995cc8988bc14bfc6e7b2c3046d73b79	b1c4751a523e332c76e239b9110407d5	96853960	SAMEA9372115	SAMEA9372182	ERR10556427	ERX10070122	PRJEB57956	ERP142973
RainbowTrout	BodyMap	Brain	Mature	Male	SAMEA9372115	SAMEA9372182	ChIP-Seq	H3K27me3	2	B3243831	ERR10556428	ERX10070123	PRJEB57956	ERP142973	83334c108faf79117f7436c2c1a7b368	293527d500eabda85b4238155b764177	99669978	SAMEA9372115	SAMEA9372179	ERR10556325	ERX10070020	PRJEB57956	ERP142973
RainbowTrout	BodyMap	Liver	Mature	Male	SAMEA9372115	SAMEA9372179	ChIP-Seq	H3K27me3	2	B3243835	ERR10556397	ERX10070092	PRJEB57956	ERP142973	fa19ab71b00d472d2323afd5ab345757	8c0867559ed8e0287fdb5aea637925c6	107992394	SAMEA9372115	SAMEA9372181	ERR10556345	ERX10070040	PRJEB57956	ERP142973
RainbowTrout	BodyMap	Muscle	Mature	Male	SAMEA9372115	SAMEA9372181	ChIP-Seq	H3K27me3	2	B3243836	ERR10556346	ERX10070041	PRJEB57956	ERP142973	b9246518f2538fbfeed90b317c5ea398	01c2f4e054d8935b9e1b679b159c4bf7	93310320	SAMEA9372115	SAMEA9372182	ERR10556428	ERX10070123	PRJEB57956	ERP142973
RainbowTrout	BodyMap	Brain	Mature	Male	SAMEA9372115	SAMEA9372182	ChIP-Seq	H3K4me1	2	B3243841	ERR10556425	ERX10070120	PRJEB57956	ERP142973	5ed022d98a83a3fdd6404e506ffa14b4	71ecdc50c11794b9538a1bd069196fe0	98481034	SAMEA9372115	SAMEA9372179	ERR10556397	ERX10070092	PRJEB57956	ERP142973
RainbowTrout	BodyMap	Liver	Mature	Male	SAMEA9372115	SAMEA9372179	ChIP-Seq	H3K4me1	2	B3243845	ERR10556398	ERX10070093	PRJEB57956	ERP142973	c5d38affdd8edcf4629991b489ca78b6	2896f4a21faefe3b3b0a0c7f6058fd43	107471350	SAMEA9372115	SAMEA9372181	ERR10556346	ERX10070041	PRJEB57956	ERP142973
RainbowTrout	BodyMap	Muscle	Mature	Male	SAMEA9372115	SAMEA9372181	ChIP-Seq	H3K4me1	2	B3243846	ERR10556347	ERX10070042	PRJEB57956	ERP142973	176ec848314391c08ebf6456fb4dbe89	9e8d623390ff936d496edf4fbead33a4	98877726	SAMEA9372115	SAMEA9372182	ERR10556425	ERX10070120	PRJEB57956	ERP142973
RainbowTrout	BodyMap	Brain	Mature	Male	SAMEA9372115	SAMEA9372182	ChIP-Seq	H3K4me3	2	B3243851	ERR10556426	ERX10070121	PRJEB57956	ERP142973	c7db5b61cfa6e1ffc13c90711bd50b99	b59d08b3a80106228340400b4c370ebb	93764756	SAMEA9372115	SAMEA9372179	ERR10556398	ERX10070093	PRJEB57956	ERP142973
RainbowTrout	BodyMap	Liver	Mature	Male	SAMEA9372115	SAMEA9372179	ChIP-Seq	H3K4me3	2	B3243855	ERR10556326	ERX10070021	PRJEB57956	ERP142973	6b68fec37b0bf50d277e4b2b1bd553e5	475ea40837cd4cbce282534b6f28d97e	96314826	SAMEA9372115	SAMEA9372181	ERR10556347	ERX10070042	PRJEB57956	ERP142973
RainbowTrout	BodyMap	Muscle	Mature	Male	SAMEA9372115	SAMEA9372181	ChIP-Seq	H3K4me3	2	B3243856	ERR10802315	ERX10250810	PRJEB57956	ERP142973	b63068582a0cbb10394e0be29547cdaa	2329a14f591826127f87c07c2d528ca4	196102012	SAMEA9372115	SAMEA9372182	ERR10556426	ERX10070121	PRJEB57956	ERP142973
RainbowTrout	BodyMap	Gonad	Mature	Male		SAMEA111397773	ChIP-Seq	Input	1	B3244863	ERR10556469	ERX10070164	PRJEB57956	ERP142973	9a42b9e37f68de756345b0adb30ab72e	be24ae420bbe7f30d3517afb1da16a84	197515822		SAMEA9372179	ERR10556326	ERX10070021	PRJEB57956	ERP142973	used for blacklist
RainbowTrout	BodyMap	Gonad	Immature	Male	SAMEA14200973	SAMEA14200979	RNA-Seq	reverse	4	B3324403	ERR10445794	ERX9970427	PRJEB57191	ERP1421159	7a9b12e06704bdb49a2788d85627f194	68ede292e295a37e536badc428bd38c7	59564004	SAMEA9372115	SAMEA9372181	ERR10802315	ERX10250810	PRJEB57956	ERP142973
RainbowTrout	BodyMap	Gonad	Immature	Male	SAMEA14200974	SAMEA14200980	RNA-Seq	reverse	5	B3324503	ERR10445795	ERX9970428	PRJEB57191	ERP1421159	0ded7d3f565cb8ef3276b00f0b4ae72b	794d8d0a73a229ad9faea242800c7b94	68223228	https://www.ebi.ac.uk/biosamples/samples/	SAMEA111397773	ERR10556469	ERX10070164	PRJEB57956	ERP142973
RainbowTrout	BodyMap	Gonad	Immature	Male	SAMEA14200975	SAMEA14200981	RNA-Seq	reverse	6	B3324603	ERR10445796	ERX9970429	PRJEB57191	ERP1421159	ff2e31cfd1478f01c69eb1a4b6459477	cb75952779ac01d060dd41d25a36baa1	63936784	SAMEA14200973	SAMEA14200979	ERR10445794	ERX9970427	PRJEB57191	ERP1421159
RainbowTrout	BodyMap	Gonad	Mature	Male	SAMEA14200976	SAMEA14200982	RNA-Seq	reverse	4	B3344703	ERR10445797	ERX9970430	PRJEB57191	ERP1421159	74a6cb3388bece41fd2d99cb5c8bc5d5	e3f80ac2ebe35af86b952e0e27a6f471	69814936	SAMEA14200974	SAMEA14200980	ERR10445795	ERX9970428	PRJEB57191	ERP1421159
RainbowTrout	BodyMap	Gonad	Mature	Male	SAMEA14200977	SAMEA14200983	RNA-Seq	reverse	5	B3344803	ERR10445798	ERX9970431	PRJEB57191	ERP1421159	5ab95c08c132e2a4eded5e92ad1a3138	723657b88ed87af78e1d71ca16e51f48	77065806	SAMEA14200975	SAMEA14200981	ERR10445796	ERX9970429	PRJEB57191	ERP1421159
RainbowTrout	BodyMap	Gonad	Mature	Male	SAMEA14200978	SAMEA14200984	RNA-Seq	reverse	6	B3344903	ERR10445799	ERX9970432	PRJEB57191	ERP1421159	c7058eb9c884423f20d1189d98a6799e	e88a31e734b592b4099449e1fe0896e8	74366580	SAMEA14200976	SAMEA14200982	ERR10445797	ERX9970430	PRJEB57191	ERP1421159
RainbowTrout	BodyMap	Gill	Immature	Male	SAMEA9372096	SAMEA9372120	RNA-Seq	reverse	1	B3320102	ERR10445668	ERX9970301	PRJEB57191	ERP1421159	859e5aae11d0c7e2ce863ba2a571c403	d476e9cf17e72c0e6e479f0aa4ed17ba	70405704	SAMEA14200977	SAMEA14200983	ERR10445798	ERX9970431	PRJEB57191	ERP1421159
RainbowTrout	BodyMap	Gonad	Immature	Male	SAMEA9372096	SAMEA9372121	RNA-Seq	reverse	1	B3320103	ERR10445669	ERX9970302	PRJEB57191	ERP1421159	6fc65231c79198d246e4bbe5ed55cad1	1782d58ba2850563c3bb31a2f1cb4deb	62730006	SAMEA14200978	SAMEA14200984	ERR10445799	ERX9970432	PRJEB57191	ERP1421159
RainbowTrout	BodyMap	HeadKidney	Immature	Male	SAMEA9372096	SAMEA9372122	RNA-Seq	reverse	1	B3320104	ERR10445670	ERX9970303	PRJEB57191	ERP1421159	81f93a2b8f1774af7aaca706098e68c7	46ed36f8b28b4eb36ec0cb6f3bbeeef4	69987508	SAMEA9372096	SAMEA9372120	ERR10445668	ERX9970301	PRJEB57191	ERP1421159
RainbowTrout	BodyMap	Liver	Immature	Male	SAMEA9372096	SAMEA9372123	RNA-Seq	reverse	1	B3320105	ERR10445671	ERX9970304	PRJEB57191	ERP1421159	c40aea48cc0e2df34eda77175b438416	9263f0319662e6246eec3649132910d3	61987864	SAMEA9372096	SAMEA9372121	ERR10445669	ERX9970302	PRJEB57191	ERP1421159
RainbowTrout	BodyMap	SuppDistalIntestine	Immature	Male	SAMEA9372096	SAMEA9372124	RNA-Seq	reverse	1	B3320107	ERR10445672	ERX9970305	PRJEB57191	ERP1421159	6638c7c2026e83cc20cfcad9277e2c09	56b8dcbd82f8ba6099fa0d92628c67b5	71113048	SAMEA9372096	SAMEA9372122	ERR10445670	ERX9970303	PRJEB57191	ERP1421159
RainbowTrout	BodyMap	Gill	Immature	Female	SAMEA9372097	SAMEA9372125	RNA-Seq	reverse	1	B3310402	ERR10445673	ERX9970306	PRJEB57191	ERP1421159	3775b6da3bc24ea7d083f3b07f45ab5f	8c3eaeb768f068a1c5db71805c434d30	62173520	SAMEA9372096	SAMEA9372123	ERR10445671	ERX9970304	PRJEB57191	ERP1421159
RainbowTrout	BodyMap	Gonad	Immature	Female	SAMEA9372097	SAMEA9372126	RNA-Seq	reverse	1	B3310403	ERR10445674	ERX9970307	PRJEB57191	ERP1421159	0bdd50cf13353028ad4d3b7f764cbda1	151b57fb899b5c24172e840aea80479b	64496296	SAMEA9372096	SAMEA9372124	ERR10445672	ERX9970305	PRJEB57191	ERP1421159
RainbowTrout	BodyMap	HeadKidney	Immature	Female	SAMEA9372097	SAMEA9372127	RNA-Seq	reverse	1	B3310404	ERR10445675	ERX9970308	PRJEB57191	ERP1421159	a74bdbbc36faad7faf2269e670e69c24	9705d14065a06f4b5c953ec2bda6602a	65707384	SAMEA9372097	SAMEA9372125	ERR10445673	ERX9970306	PRJEB57191	ERP1421159
RainbowTrout	BodyMap	Liver	Immature	Female	SAMEA9372097	SAMEA9372128	RNA-Seq	reverse	1	B3310405	ERR10445676	ERX9970309	PRJEB57191	ERP1421159	8c94178c1988e8aad852b050e65ed555	7f71f16149aceef9398c9a6c3f793968	75330972	SAMEA9372097	SAMEA9372126	ERR10445674	ERX9970307	PRJEB57191	ERP1421159
RainbowTrout	BodyMap	SuppDistalIntestine	Immature	Female	SAMEA9372097	SAMEA9372129	RNA-Seq	reverse	1	B3310407	ERR10445677	ERX9970310	PRJEB57191	ERP1421159	365484cd4cc35790214807ae2169de71	0ab490c254bce7aa8ca3be6d8c5d7037	66835444	SAMEA9372097	SAMEA9372127	ERR10445675	ERX9970308	PRJEB57191	ERP1421159
RainbowTrout	BodyMap	Gill	Immature	Female	SAMEA9372098	SAMEA9372130	RNA-Seq	reverse	2	B3310502	ERR10445678	ERX9970311	PRJEB57191	ERP1421159	d3a0a278444cfba147827fcd0acfa82b	acb94f11a4941e148d9741e80f708203	69884600	SAMEA9372097	SAMEA9372128	ERR10445676	ERX9970309	PRJEB57191	ERP1421159
RainbowTrout	BodyMap	Gonad	Immature	Female	SAMEA9372098	SAMEA9372131	RNA-Seq	reverse	2	B3310503	ERR10445679	ERX9970312	PRJEB57191	ERP1421159	0c5e706ae692e85e0d775492906308fd	206efe0b53c6925f41cc4dbe0809d9df	69803166	SAMEA9372097	SAMEA9372129	ERR10445677	ERX9970310	PRJEB57191	ERP1421159
RainbowTrout	BodyMap	HeadKidney	Immature	Female	SAMEA9372098	SAMEA9372132	RNA-Seq	reverse	2	B3310504	ERR10445680	ERX9970313	PRJEB57191	ERP1421159	fddc703a7b73d8ee14e8699a587f4838	020900f21d1b14a0e86a7ebe69f5a0ef	67556192	SAMEA9372098	SAMEA9372130	ERR10445678	ERX9970311	PRJEB57191	ERP1421159
RainbowTrout	BodyMap	Liver	Immature	Female	SAMEA9372098	SAMEA9372133	RNA-Seq	reverse	2	B3310505	ERR10445681	ERX9970314	PRJEB57191	ERP1421159	a2225e0addf932c3d918a21cc79c88e2	e7b110cb821a0f0562f5ea2e6c06e6d5	63882838	SAMEA9372098	SAMEA9372131	ERR10445679	ERX9970312	PRJEB57191	ERP1421159
RainbowTrout	BodyMap	SuppDistalIntestine	Immature	Female	SAMEA9372098	SAMEA9372134	RNA-Seq	reverse	2	B3310507	ERR10445682	ERX9970315	PRJEB57191	ERP1421159	8a91242dd1d83366ee8651827f6ceb7b	7798c08781bff3c4d1b4f00e2f799aa5	67990784	SAMEA9372098	SAMEA9372132	ERR10445680	ERX9970313	PRJEB57191	ERP1421159
RainbowTrout	BodyMap	Gill	Immature	Male	SAMEA9372099	SAMEA9372135	RNA-Seq	reverse	2	B3320802	ERR10445683	ERX9970316	PRJEB57191	ERP1421159	2bdc782a9195df335bf2a7fd42fbdd5a	3d304315c270d0d646503fa8d5fd913c	70349804	SAMEA9372098	SAMEA9372133	ERR10445681	ERX9970314	PRJEB57191	ERP1421159
RainbowTrout	BodyMap	Gonad	Immature	Male	SAMEA9372099	SAMEA9372136	RNA-Seq	reverse	2	B3320803	ERR10445684	ERX9970317	PRJEB57191	ERP1421159	cf1a4a3ad8996111c260cad9b033942a	19eca7b78b326c7fb824511421550a0f	63454200	SAMEA9372098	SAMEA9372134	ERR10445682	ERX9970315	PRJEB57191	ERP1421159
RainbowTrout	BodyMap	HeadKidney	Immature	Male	SAMEA9372099	SAMEA9372137	RNA-Seq	reverse	2	B3320804	ERR10445685	ERX9970318	PRJEB57191	ERP1421159	041e67f99ba6bad0fc36cb89f3c90d84	aae39063e0c0fecb7f6dd15d0576e4ce	66152696	SAMEA9372099	SAMEA9372135	ERR10445683	ERX9970316	PRJEB57191	ERP1421159
RainbowTrout	BodyMap	Liver	Immature	Male	SAMEA9372099	SAMEA9372138	RNA-Seq	reverse	2	B3320805	ERR10445686	ERX9970319	PRJEB57191	ERP1421159	e5e4640191b2c2ef07aba32d468662bc	54741e9f14456102b3ecb9f989fac8e6	65149852	SAMEA9372099	SAMEA9372136	ERR10445684	ERX9970317	PRJEB57191	ERP1421159
RainbowTrout	BodyMap	SuppDistalIntestine	Immature	Male	SAMEA9372099	SAMEA9372139	RNA-Seq	reverse	2	B3320807	ERR10445687	ERX9970320	PRJEB57191	ERP1421159	9f7cd23bc9d17f5d7c9b16538f8ebd20	97eb5cf0e819263a8b61f2fadaac72af	67876412	SAMEA9372099	SAMEA9372137	ERR10445685	ERX9970318	PRJEB57191	ERP1421159
RainbowTrout	BodyMap	Gill	Immature	Female	SAMEA9372100	SAMEA9372140	RNA-Seq	reverse	3	B3310902	ERR10445688	ERX9970321	PRJEB57191	ERP1421159	4cc1f96cdd42114fef720834904c819f	e539ddd16e67fdebd66e55c074d28abc	70929388	SAMEA9372099	SAMEA9372138	ERR10445686	ERX9970319	PRJEB57191	ERP1421159
RainbowTrout	BodyMap	Gonad	Immature	Female	SAMEA9372100	SAMEA9372141	RNA-Seq	reverse	3	B3310903	ERR10445689	ERX9970322	PRJEB57191	ERP1421159	c6c2db296550637ad78bff550135b72e	3c46390a63155e0f01d6a1453e08cf91	66403756	SAMEA9372099	SAMEA9372139	ERR10445687	ERX9970320	PRJEB57191	ERP1421159
RainbowTrout	BodyMap	HeadKidney	Immature	Female	SAMEA9372100	SAMEA9372142	RNA-Seq	reverse	3	B3310904	ERR10445690	ERX9970323	PRJEB57191	ERP1421159	5747801d00ad875f8b4d827ab2b7b26d	362d1aac46caceca8f6a4714bcf4357a	68176428	SAMEA9372100	SAMEA9372140	ERR10445688	ERX9970321	PRJEB57191	ERP1421159
RainbowTrout	BodyMap	Liver	Immature	Female	SAMEA9372100	SAMEA9372143	RNA-Seq	reverse	3	B3310905	ERR10445691	ERX9970324	PRJEB57191	ERP1421159	441c999ed02a7f2e6413d47d00274ed2	55ce756a2e48fd9bdf338e93b3185d8f	66463234	SAMEA9372100	SAMEA9372141	ERR10445689	ERX9970322	PRJEB57191	ERP1421159
RainbowTrout	BodyMap	SuppDistalIntestine	Immature	Female	SAMEA9372100	SAMEA9372144	RNA-Seq	reverse	3	B3310907	ERR10445692	ERX9970325	PRJEB57191	ERP1421159	bacb5ccb88ad670ff992818e80a1c176	ec6ef0c39fa5c9c4920d2161b1ebb443	65084086	SAMEA9372100	SAMEA9372142	ERR10445690	ERX9970323	PRJEB57191	ERP1421159
RainbowTrout	BodyMap	Gill	Immature	Male	SAMEA9372101	SAMEA9372145	RNA-Seq	reverse	3	B3321002	ERR10445693	ERX9970326	PRJEB57191	ERP1421159	ee95a36598cf3d7599389d3744e59da1	ad40e6f8189f14643baf22f6bd8cca76	63380484	SAMEA9372100	SAMEA9372143	ERR10445691	ERX9970324	PRJEB57191	ERP1421159
RainbowTrout	BodyMap	Gonad	Immature	Male	SAMEA9372101	SAMEA9372146	RNA-Seq	reverse	3	B3321003	ERR10445694	ERX9970327	PRJEB57191	ERP1421159	f9b129c361a611ead25513dbee479bd5	97182af019920c592e3c88f371d042be	70038446	SAMEA9372100	SAMEA9372144	ERR10445692	ERX9970325	PRJEB57191	ERP1421159
RainbowTrout	BodyMap	HeadKidney	Immature	Male	SAMEA9372101	SAMEA9372147	RNA-Seq	reverse	3	B3321004	ERR10445695	ERX9970328	PRJEB57191	ERP1421159	4691322d05b270f99f0c7fb7215f75f1	28b6afb3bbf8633415b1874dd79996f1	74625318	SAMEA9372101	SAMEA9372145	ERR10445693	ERX9970326	PRJEB57191	ERP1421159
RainbowTrout	BodyMap	Liver	Immature	Male	SAMEA9372101	SAMEA9372148	RNA-Seq	reverse	3	B3321005	ERR10445696	ERX9970329	PRJEB57191	ERP1421159	5e680be3086bd596d2a1b425e9d27394	fac19f42f1d123e3a8fc765073d8b579	66424218	SAMEA9372101	SAMEA9372146	ERR10445694	ERX9970327	PRJEB57191	ERP1421159
RainbowTrout	BodyMap	SuppDistalIntestine	Immature	Male	SAMEA9372101	SAMEA9372149	RNA-Seq	reverse	3	B3321007	ERR10445697	ERX9970330	PRJEB57191	ERP1421159	d4b27f7561ef1fccfd505bc0309c6419	1cc919b36a101330a88e0388a3338fdd	66834752	SAMEA9372101	SAMEA9372147	ERR10445695	ERX9970328	PRJEB57191	ERP1421159
RainbowTrout	BodyMap	Brain	Immature	Male	SAMEA9372102	SAMEA9372150	RNA-Seq	reverse	1	B3321101	ERR10445698	ERX9970331	PRJEB57191	ERP1421159	7f216c8339dc9732ddfbba83a8b9fe2d	33d0f7e7e08f040bbd34712a6264c73b	59796832	SAMEA9372101	SAMEA9372148	ERR10445696	ERX9970329	PRJEB57191	ERP1421159
RainbowTrout	BodyMap	Brain	Immature	Female	SAMEA9372103	SAMEA9372151	RNA-Seq	reverse	1	B3311301	ERR10445699	ERX9970332	PRJEB57191	ERP1421159	3032e743d722e67c2cc6ee4c6612f25a	d6175e28346d8fa1b13df991ad7c75cf	68191140	SAMEA9372101	SAMEA9372149	ERR10445697	ERX9970330	PRJEB57191	ERP1421159
RainbowTrout	BodyMap	Brain	Immature	Female	SAMEA9372104	SAMEA9372152	RNA-Seq	reverse	2	B3311501	ERR10445700	ERX9970333	PRJEB57191	ERP1421159	ba27d29c0749f3c124fb181dfe7c13bb	94e50f0a37e3cb813acf3bba467cf11f	66641068	SAMEA9372102	SAMEA9372150	ERR10445698	ERX9970331	PRJEB57191	ERP1421159
RainbowTrout	BodyMap	Brain	Immature	Male	SAMEA9372105	SAMEA9372153	RNA-Seq	reverse	2	B3321601	ERR10445701	ERX9970334	PRJEB57191	ERP1421159	273b2e12eb72ff6d7b83ac5a796e3078	8075634e2eab68f83eb699486e3db408	66802934	SAMEA9372103	SAMEA9372151	ERR10445699	ERX9970332	PRJEB57191	ERP1421159
RainbowTrout	BodyMap	Brain	Immature	Female	SAMEA9372106	SAMEA9372154	RNA-Seq	reverse	3	B3311701	ERR10445702	ERX9970335	PRJEB57191	ERP1421159	6c452b0ca9412a7ac64974cedc9c756b	b8959a07b539d3b2ef77416a9565a890	69226406	SAMEA9372104	SAMEA9372152	ERR10445700	ERX9970333	PRJEB57191	ERP1421159
RainbowTrout	BodyMap	Brain	Immature	Male	SAMEA9372107	SAMEA9372155	RNA-Seq	reverse	3	B3321901	ERR10445703	ERX9970336	PRJEB57191	ERP1421159	0d88544ab031fc31f12f2262c4ec2d9b	f5ceb7d5611cc97b0c6fc6c457464bbd	69707250	SAMEA9372105	SAMEA9372153	ERR10445701	ERX9970334	PRJEB57191	ERP1421159
RainbowTrout	BodyMap	Muscle	Immature	Male	SAMEA9372108	SAMEA9372156	RNA-Seq	reverse	1	B3322806	ERR10445704	ERX9970337	PRJEB57191	ERP1421159	4cc8bc992a7a063e623c2b0c8554530b	846105459e6e56d06259c00f6e9c3c41	65368376	SAMEA9372106	SAMEA9372154	ERR10445702	ERX9970335	PRJEB57191	ERP1421159
RainbowTrout	BodyMap	Muscle	Immature	Female	SAMEA9372109	SAMEA9372157	RNA-Seq	reverse	1	B3313006	ERR10445705	ERX9970338	PRJEB57191	ERP1421159	c0c0b329445f16d06404b76100fa89bf	566ba669355ccf1992c6408b5278570a	70862722	SAMEA9372107	SAMEA9372155	ERR10445703	ERX9970336	PRJEB57191	ERP1421159
RainbowTrout	BodyMap	Muscle	Immature	Female	SAMEA9372110	SAMEA9372158	RNA-Seq	reverse	2	B3313106	ERR10445706	ERX9970339	PRJEB57191	ERP1421159	f8b4bdbf4ae8201c97fc1e486a85441f	d62fd65f43bc2cf70df5b1dc616c4abb	68581692	SAMEA9372108	SAMEA9372156	ERR10445704	ERX9970337	PRJEB57191	ERP1421159
RainbowTrout	BodyMap	Muscle	Immature	Female	SAMEA9372111	SAMEA9372159	RNA-Seq	reverse	3	B3313306	ERR10445707	ERX9970340	PRJEB57191	ERP1421159	8a4d21eaee2fc788b7708d2c6417d706	ea804852560b6795c7bda48fc89dc68f	73797582	SAMEA9372109	SAMEA9372157	ERR10445705	ERX9970338	PRJEB57191	ERP1421159
RainbowTrout	BodyMap	Muscle	Immature	Male	SAMEA9372112	SAMEA9372160	RNA-Seq	reverse	2	B3323406	ERR10445708	ERX9970341	PRJEB57191	ERP1421159	b964d50a5d97f5be7ce58f7b7149bec2	2e062e6b055d41cb1b758c05e54e8558	69093350	SAMEA9372110	SAMEA9372158	ERR10445706	ERX9970339	PRJEB57191	ERP1421159
RainbowTrout	BodyMap	Muscle	Immature	Male	SAMEA9372113	SAMEA9372161	RNA-Seq	reverse	3	B3323606	ERR10445709	ERX9970342	PRJEB57191	ERP1421159	82e6a6fb59c3a81149c5da5d2f20c9bf	b51e1701ae99fbb1daefe4acf8a28282	63710418	SAMEA9372111	SAMEA9372159	ERR10445707	ERX9970340	PRJEB57191	ERP1421159
RainbowTrout	BodyMap	Gill	Mature	Male	SAMEA9372116	SAMEA9372162	RNA-Seq	reverse	3	B3344002	ERR10445710	ERX9970343	PRJEB57191	ERP1421159	0c01ab1d3ff2a7c8d9529cfec2f7f128	2c1d4b76e6a5857007f8348f334017ad	67503924	SAMEA9372112	SAMEA9372160	ERR10445708	ERX9970341	PRJEB57191	ERP1421159
RainbowTrout	BodyMap	Gonad	Mature	Male	SAMEA9372116	SAMEA9372163	RNA-Seq	reverse	3	B3344003	ERR10445711	ERX9970344	PRJEB57191	ERP1421159	06632d4bd9760d82134f13fbfb239525	e658a091d1ba3573c3e421a24cc33d93	63960966	SAMEA9372113	SAMEA9372161	ERR10445709	ERX9970342	PRJEB57191	ERP1421159
RainbowTrout	BodyMap	HeadKidney	Mature	Male	SAMEA9372116	SAMEA9372164	RNA-Seq	reverse	3	B3344004	ERR10445712	ERX9970345	PRJEB57191	ERP1421159	80193cadae91153d2f08b441da745fdc	c86fa90a73ee5b7f2d365aba348d60b5	63051894	SAMEA9372116	SAMEA9372162	ERR10445710	ERX9970343	PRJEB57191	ERP1421159
RainbowTrout	BodyMap	Liver	Mature	Male	SAMEA9372116	SAMEA9372165	RNA-Seq	reverse	3	B3344005	ERR10445713	ERX9970346	PRJEB57191	ERP1421159	22bc237ce3cda34955d3fe4c5e35c0c4	7e164018d0b244054eb0491e8597732c	60438692	SAMEA9372116	SAMEA9372163	ERR10445711	ERX9970344	PRJEB57191	ERP1421159
RainbowTrout	BodyMap	SuppDistalIntestine	Mature	Male	SAMEA9372116	SAMEA9372166	RNA-Seq	reverse	3	B3344007	ERR10445714	ERX9970347	PRJEB57191	ERP1421159	781927333e387219e8c305c689fac06c	3b44d2fb3c33481edc5ab5f554f36ebc	64941446	SAMEA9372116	SAMEA9372164	ERR10445712	ERX9970345	PRJEB57191	ERP1421159
RainbowTrout	BodyMap	Muscle	Mature	Male	SAMEA9372116	SAMEA9372167	RNA-Seq	reverse	3	B3344006	ERR10445715	ERX9970348	PRJEB57191	ERP1421159	afe33696b1d3bff8dcfcfa57e6fb2624	40d165c38d85eb8ff657b056f89ccfde	65083180	SAMEA9372116	SAMEA9372165	ERR10445713	ERX9970346	PRJEB57191	ERP1421159
RainbowTrout	BodyMap	Brain	Mature	Male	SAMEA9372116	SAMEA9372168	RNA-Seq	reverse	3	B3344001	ERR10445716	ERX9970349	PRJEB57191	ERP1421159	b4425598143336861b89cd19be0cfd6a	41819c54a452f892de10448e6411686f	65946492	SAMEA9372116	SAMEA9372166	ERR10445714	ERX9970347	PRJEB57191	ERP1421159
RainbowTrout	BodyMap	Gill	Mature	Male	SAMEA9372114	SAMEA9372169	RNA-Seq	reverse	1	B3343702	ERR10445717	ERX9970350	PRJEB57191	ERP1421159	ff128f170d5c5e3342cedbc9f7e7f492	bdbcbbbab3ce47ed18478900ea0b8669	67146106	SAMEA9372116	SAMEA9372167	ERR10445715	ERX9970348	PRJEB57191	ERP1421159
RainbowTrout	BodyMap	Gonad	Mature	Male	SAMEA9372114	SAMEA9372170	RNA-Seq	reverse	1	B3343703	ERR10445718	ERX9970351	PRJEB57191	ERP1421159	9b48bc72e088b6f774cb778e42583d7e	f2834695db0b438a4c3274be5bd5595e	65187642	SAMEA9372116	SAMEA9372168	ERR10445716	ERX9970349	PRJEB57191	ERP1421159
RainbowTrout	BodyMap	HeadKidney	Mature	Male	SAMEA9372114	SAMEA9372171	RNA-Seq	reverse	1	B3343704	ERR10445719	ERX9970352	PRJEB57191	ERP1421159	db810b9e62f8dbebea22afd86041ae40	58d813eb9e05b91495d98f9626d358f9	78753990	SAMEA9372114	SAMEA9372169	ERR10445717	ERX9970350	PRJEB57191	ERP1421159
RainbowTrout	BodyMap	Liver	Mature	Male	SAMEA9372114	SAMEA9372172	RNA-Seq	reverse	1	B3343705	ERR10445720	ERX9970353	PRJEB57191	ERP1421159	2f8c46956393816698d12e1dc5e434e4	b37151866779ae6b91287a008e80d0e3	66494220	SAMEA9372114	SAMEA9372170	ERR10445718	ERX9970351	PRJEB57191	ERP1421159
RainbowTrout	BodyMap	SuppDistalIntestine	Mature	Male	SAMEA9372114	SAMEA9372173	RNA-Seq	reverse	1	B3343707	ERR10445721	ERX9970354	PRJEB57191	ERP1421159	e865bd826cc72f1bec02c1ac8991a472	1da9c5cfa0a61f9272ab6f170658f5cf	65922860	SAMEA9372114	SAMEA9372171	ERR10445719	ERX9970352	PRJEB57191	ERP1421159
RainbowTrout	BodyMap	Muscle	Mature	Male	SAMEA9372114	SAMEA9372174	RNA-Seq	reverse	1	B3343706	ERR10445722	ERX9970355	PRJEB57191	ERP1421159	bb8ee76958b1a202a3f400d03217e3ca	069aa98afde77c06b6c60f74ea45802b	66779544	SAMEA9372114	SAMEA9372172	ERR10445720	ERX9970353	PRJEB57191	ERP1421159
RainbowTrout	BodyMap	Brain	Mature	Male	SAMEA9372114	SAMEA9372175	RNA-Seq	reverse	1	B3343701	ERR10445723	ERX9970356	PRJEB57191	ERP1421159	1c164f58782b0f033a4a2a6c911342c7	f936f5759ad42319ec70ca68df2cb227	66624606	SAMEA9372114	SAMEA9372173	ERR10445721	ERX9970354	PRJEB57191	ERP1421159
RainbowTrout	BodyMap	Gill	Mature	Male	SAMEA9372115	SAMEA9372176	RNA-Seq	reverse	2	B3343802	ERR10445724	ERX9970357	PRJEB57191	ERP1421159	f6ca806de518b0aafaa86a16a9510422	439780765de1db3b3551b5ab38ed7b96	65958442	SAMEA9372114	SAMEA9372174	ERR10445722	ERX9970355	PRJEB57191	ERP1421159
RainbowTrout	BodyMap	Gonad	Mature	Male	SAMEA9372115	SAMEA9372177	RNA-Seq	reverse	2	B3343803	ERR10445725	ERX9970358	PRJEB57191	ERP1421159	2828692ea34fc1388b46ee952e99bf3e	e416deea4e79e5fafcef473d19af4c57	66388242	SAMEA9372114	SAMEA9372175	ERR10445723	ERX9970356	PRJEB57191	ERP1421159
RainbowTrout	BodyMap	HeadKidney	Mature	Male	SAMEA9372115	SAMEA9372178	RNA-Seq	reverse	2	B3343804	ERR10445726	ERX9970359	PRJEB57191	ERP1421159	dcec9d3273f36720548b87854815af90	7e5ca781f3735091a134b0c881c92fd7	65089498	SAMEA9372115	SAMEA9372176	ERR10445724	ERX9970357	PRJEB57191	ERP1421159
RainbowTrout	BodyMap	Liver	Mature	Male	SAMEA9372115	SAMEA9372179	RNA-Seq	reverse	2	B3343805	ERR10445727	ERX9970360	PRJEB57191	ERP1421159	7e5cd9f1560a1fbfc22462790b642b1e	dff9625c40ff3dd6f0b5c6a58d4f476c	65670362	SAMEA9372115	SAMEA9372177	ERR10445725	ERX9970358	PRJEB57191	ERP1421159
RainbowTrout	BodyMap	SuppDistalIntestine	Mature	Male	SAMEA9372115	SAMEA9372180	RNA-Seq	reverse	2	B3343807	ERR10445728	ERX9970361	PRJEB57191	ERP1421159	afaf89577a24d5560dbdd296c2e97b8b	66d1ea7f74cc4895f63f8e4f8d3fdca0	63294320	SAMEA9372115	SAMEA9372178	ERR10445726	ERX9970359	PRJEB57191	ERP1421159
RainbowTrout	BodyMap	Muscle	Mature	Male	SAMEA9372115	SAMEA9372181	RNA-Seq	reverse	2	B3343806	ERR10445729	ERX9970362	PRJEB57191	ERP1421159	70bf2090c9ad7dca83b00147ab876135	677650dd9f525ab942778a9a74c220f4	73921262	SAMEA9372115	SAMEA9372179	ERR10445727	ERX9970360	PRJEB57191	ERP1421159
RainbowTrout	BodyMap	Brain	Mature	Male	SAMEA9372115	SAMEA9372182	RNA-Seq	reverse	2	B3343801	ERR10445730	ERX9970363	PRJEB57191	ERP1421159	99c3b7b4c865c35d79e3d6eface85a92	350280bebc7075fda9a4912f913a09a8	65312586	SAMEA9372115	SAMEA9372180	ERR10445728	ERX9970361	PRJEB57191	ERP1421159
RainbowTrout	BodyMap	Gill	Mature	Female	SAMEA9372117	SAMEA9372183	RNA-Seq	reverse	1	B3334102	ERR10445731	ERX9970364	PRJEB57191	ERP1421159	b74e048f6f33c8a515e920d6f9b3d23e	c88d1754593510e9ca4e761c0bc1364a	74357484	SAMEA9372115	SAMEA9372181	ERR10445729	ERX9970362	PRJEB57191	ERP1421159
RainbowTrout	BodyMap	Gonad	Mature	Female	SAMEA9372117	SAMEA9372184	RNA-Seq	reverse	1	B3334103	ERR10445732	ERX9970365	PRJEB57191	ERP1421159	7334d2352eb7f849f00ef97d022a8bfb	72f5ecc7d4532821a00603506b9758f9	58822986	SAMEA9372115	SAMEA9372182	ERR10445730	ERX9970363	PRJEB57191	ERP1421159
RainbowTrout	BodyMap	HeadKidney	Mature	Female	SAMEA9372117	SAMEA9372185	RNA-Seq	reverse	1	B3334104	ERR10445733	ERX9970366	PRJEB57191	ERP1421159	590efda4ccfc6d7e9a341074742486ae	0ad05284b1246e9b86b92ad494fc10b7	68641514	SAMEA9372117	SAMEA9372183	ERR10445731	ERX9970364	PRJEB57191	ERP1421159
RainbowTrout	BodyMap	Liver	Mature	Female	SAMEA9372117	SAMEA9372186	RNA-Seq	reverse	1	B3334105	ERR10445734	ERX9970367	PRJEB57191	ERP1421159	9b3efb39996662e8d19a88acf09e37c3	40cee61b372fd35ee4e383c6ef5d2a93	70438578	SAMEA9372117	SAMEA9372184	ERR10445732	ERX9970365	PRJEB57191	ERP1421159
RainbowTrout	BodyMap	SuppDistalIntestine	Mature	Female	SAMEA9372117	SAMEA9372187	RNA-Seq	reverse	1	B3334107	ERR10445735	ERX9970368	PRJEB57191	ERP1421159	73c29516f7edf0324ca307a8a06a9e35	09389f572b1b06cefb459341b4391e28	71203662	SAMEA9372117	SAMEA9372185	ERR10445733	ERX9970366	PRJEB57191	ERP1421159
RainbowTrout	BodyMap	Muscle	Mature	Female	SAMEA9372117	SAMEA9372188	RNA-Seq	reverse	1	B3334106	ERR10445736	ERX9970369	PRJEB57191	ERP1421159	62f5c74621d22038175108890115d387	370514f016be9942f18eb2c42afe9d49	62260634	SAMEA9372117	SAMEA9372186	ERR10445734	ERX9970367	PRJEB57191	ERP1421159
RainbowTrout	BodyMap	Brain	Mature	Female	SAMEA9372117	SAMEA9372189	RNA-Seq	reverse	1	B3334101	ERR10445737	ERX9970370	PRJEB57191	ERP1421159	8fdeeeacb98ebc7af180d09927ac7664	82481fb10435ace7ebc850a882f592fb	69927414	SAMEA9372117	SAMEA9372187	ERR10445735	ERX9970368	PRJEB57191	ERP1421159
RainbowTrout	BodyMap	Gill	Mature	Female	SAMEA9372118	SAMEA9372190	RNA-Seq	reverse	2	B3334202	ERR10445738	ERX9970371	PRJEB57191	ERP1421159	dc25738d8b8031388338c3a3166a7525	72c9fdb97cadf7bd1c9034bb0ce5d2b5	68982658	SAMEA9372117	SAMEA9372188	ERR10445736	ERX9970369	PRJEB57191	ERP1421159
RainbowTrout	BodyMap	Gonad	Mature	Female	SAMEA9372118	SAMEA9372191	RNA-Seq	reverse	2	B3334203	ERR10445739	ERX9970372	PRJEB57191	ERP1421159	cfee9198579d6463c4d9dd0810700e4e	345b3dbe99af2c76e50ada59d537ab81	74968012	SAMEA9372117	SAMEA9372189	ERR10445737	ERX9970370	PRJEB57191	ERP1421159
RainbowTrout	BodyMap	HeadKidney	Mature	Female	SAMEA9372118	SAMEA9372192	RNA-Seq	reverse	2	B3334204	ERR10445740	ERX9970373	PRJEB57191	ERP1421159	a67fe0e5d31c5ccc9e66af94970cebcb	b3588b3a7a631679246e379735567fba	72453234	SAMEA9372118	SAMEA9372190	ERR10445738	ERX9970371	PRJEB57191	ERP1421159
RainbowTrout	BodyMap	Liver	Mature	Female	SAMEA9372118	SAMEA9372193	RNA-Seq	reverse	2	B3334205	ERR10445741	ERX9970374	PRJEB57191	ERP1421159	5adb0344db914ba2e7f6121b23525b28	88ef3fd9f2be00a7ac6bff61abd4fec8	70059150	SAMEA9372118	SAMEA9372191	ERR10445739	ERX9970372	PRJEB57191	ERP1421159
RainbowTrout	BodyMap	SuppDistalIntestine	Mature	Female	SAMEA9372118	SAMEA9372194	RNA-Seq	reverse	2	B3334207	ERR10445742	ERX9970375	PRJEB57191	ERP1421159	922fb9a2a6d2a313f5b48a52185969a7	7b37e79686f5194bdfc8be503f18f465	72760108	SAMEA9372118	SAMEA9372192	ERR10445740	ERX9970373	PRJEB57191	ERP1421159
RainbowTrout	BodyMap	Muscle	Mature	Female	SAMEA9372118	SAMEA9372195	RNA-Seq	reverse	2	B3334206	ERR10445743	ERX9970376	PRJEB57191	ERP1421159	3d3a1b3292b106758abb44e36cb3d3fd	73a4c82e9707cdc559cf11b8673238cf	67143328	SAMEA9372118	SAMEA9372193	ERR10445741	ERX9970374	PRJEB57191	ERP1421159
RainbowTrout	BodyMap	Brain	Mature	Female	SAMEA9372118	SAMEA9372196	RNA-Seq	reverse	2	B3334201	ERR10445744	ERX9970377	PRJEB57191	ERP1421159	b82dbde30e257d0adeb9ceb39e42be4f	f095cc1be282da9d1babc467a827dfe7	74644100	SAMEA9372118	SAMEA9372194	ERR10445742	ERX9970375	PRJEB57191	ERP1421159
RainbowTrout	BodyMap	Gill	Mature	Female	SAMEA9372118	SAMEA9372197	RNA-Seq	reverse	3	B3334302	ERR10445745	ERX9970378	PRJEB57191	ERP1421159	83b11e1ff8c0f3d5a4f941b902bbf46b	0c620de3c93393de1fcf9afc3ea88aab	74336384	SAMEA9372118	SAMEA9372195	ERR10445743	ERX9970376	PRJEB57191	ERP1421159
RainbowTrout	BodyMap	Gonad	Mature	Female	SAMEA9372119	SAMEA9372198	RNA-Seq	reverse	3	B3334303	ERR10445746	ERX9970379	PRJEB57191	ERP1421159	97549dc316a6271b2fbd8ce514aaf028	89317771ccc220e9fa5ffbb7470887e6	73993504	SAMEA9372118	SAMEA9372196	ERR10445744	ERX9970377	PRJEB57191	ERP1421159
RainbowTrout	BodyMap	HeadKidney	Mature	Female	SAMEA9372119	SAMEA9372199	RNA-Seq	reverse	3	B3334304	ERR10445747	ERX9970380	PRJEB57191	ERP1421159	de8bf152bd655b94fb8e0a253995403b	b4f892533f97d1ae054a33db629288a6	70093698	SAMEA9372118	SAMEA9372197	ERR10445745	ERX9970378	PRJEB57191	ERP1421159
RainbowTrout	BodyMap	Liver	Mature	Female	SAMEA9372119	SAMEA9372200	RNA-Seq	reverse	3	B3334305	ERR10445748	ERX9970381	PRJEB57191	ERP1421159	1fccd364e71f5d3aa9df1ab3ea8c765f	8bbaba1412ca15b926d84734d6536578	68416112	SAMEA9372119	SAMEA9372198	ERR10445746	ERX9970379	PRJEB57191	ERP1421159
RainbowTrout	BodyMap	SuppDistalIntestine	Mature	Female	SAMEA9372119	SAMEA9372201	RNA-Seq	reverse	3	B3334307	ERR10445749	ERX9970382	PRJEB57191	ERP1421159	5f6cc3ba926cf20e5f9ab14b5aad0e9c	46059f4c65a08fc211fb502e0b7fc4d5	68654426	SAMEA9372119	SAMEA9372199	ERR10445747	ERX9970380	PRJEB57191	ERP1421159
RainbowTrout	BodyMap	Muscle	Mature	Female	SAMEA9372119	SAMEA9372202	RNA-Seq	reverse	3	B3334306	ERR10445750	ERX9970383	PRJEB57191	ERP1421159	67cf84bbabfbd8163e4c2001e89af8d0	fcbe55e6fd0d3c386cd69becb8f660b8	71487720	SAMEA9372119	SAMEA9372200	ERR10445748	ERX9970381	PRJEB57191	ERP1421159
RainbowTrout	BodyMap	Brain	Mature	Female	SAMEA9372119	SAMEA9372203	RNA-Seq	reverse	3	B3334301	ERR10445751	ERX9970384	PRJEB57191	ERP1421159	7e872f82cdc70ffa1462036de1c57f18	355b819ba034277456cc2e940761c8b7	95840288	SAMEA9372119	SAMEA9372201	ERR10445749	ERX9970382	PRJEB57191	ERP1421159

## Sheet: Table S4
	Block	Block Name	Chr. A	Start	End	Chr. B	Start	End	Direction	Size 1	size2
	1	1p-9qa	ssa01	615732	2825741	ssa09	50357580	54559880	+	2210009	4202300
	2	1p-9qa	ssa01	3094165	8630578	ssa09	43855980	49950940	-	5536413	6094960
	3	1p-9qa	ssa01	8757130	10483260	ssa09	169555	2063987	-	1726130	1894432
	4	1p-9qa	ssa01	10689990	47075000	ssa09	6438764	43821290	+	36385010	37382526
	5	1p-9qa	ssa01	47093510	48077000	ssa09	2096682	3329800	+	983490	1233118
	6	1qa-18qa	ssa01	48924370	77044600	ssa18	4817637	32035730	+	28120230	27218093
	7	1qa-28	ssa01	77072650	87593760	ssa28	25492510	36589770	+	10521110	11097260
	8	1qa-28	ssa01	87598810	103003500	ssa28	13412480	25467840	+	15404690	12055360
	9	1qa-18qa	ssa01	103004900	107273800	ssa18	32040420	35714810	+	4268900	3674390
	10	1qa-18qa	ssa01	107619300	110000400	ssa18	47404120	49342590	-	2381100	1938470
	11	1qa-18qa	ssa01	110512700	118886200	ssa18	37773700	46177610	+	8373500	8403910
	12	1qb-13qb	ssa01	119961700	120459500	ssa13	105785900	106469600	-	497800	683700
	13	1qb-13qb	ssa01	122009600	122699200	ssa13	104608500	105351000	-	689600	742500
	14	1qb-13qb	ssa01	123245200	134764100	ssa13	90413780	104168400	-	11518900	13754620
	15	1qb-11qb	ssa01	134769900	156685900	ssa11	64414410	87825290	-	21916000	23410880
	16	1qb-11qb	ssa01	156785600	157279600	ssa11	59121700	59454180	-	494000	332480
	17	1qb-11qb	ssa01	157383900	164200400	ssa11	59479440	64364590	+	6816500	4885150
	18	1qb-13qb	ssa01	167488900	174445100	ssa13	106530800	114130300	-	6956200	7599500
	19	2p-5q	ssa02	4246	46524970	ssa05	48096330	92781200	-	46520724	44684870
	20	2p-5q	ssa02	46549690	48342360	ssa05	46900230	48059800	+	1792670	1159570
	21	2q-12qa	ssa02	48658460	49125030	ssa12	38378490	39105560	+	466570	727070
	22	2q-12qa	ssa02	49142300	84796490	ssa12	3819742	38133250	-	35654190	34313508
	23	2q-12qa	ssa02	91955590	94733170	ssa12	268736	3582154	-	2777580	3313418
	24	3p-14qa	ssa03	2160013	2359288	ssa14	3918	211908	-	199275	207990
	25	3p-14qa	ssa03	3335932	6970783	ssa14	46920290	51430060	-	3634851	4509770
	26	3p-14qa	ssa03	6976632	8915574	ssa14	5052335	6591280	-	1938942	1538945
	27	3p-14qa	ssa03	8994046	40504740	ssa14	7033948	39225210	+	31510694	32191262
	28	3p-14qa	ssa03	40851130	45141280	ssa14	39271890	45051990	-	4290150	5780100
	29	3p-13qa	ssa03	45492450	47871440	ssa13	17468520	20160680	-	2378990	2692160
	30	3p-5q	ssa03	48064300	48126330	ssa05	21053100	21112740	-	62030	59640
	31	3p-5q	ssa03	48201510	48863160	ssa05	21518970	22001510	+	661650	482540
	32	3p-23	ssa03	48936550	52329020	ssa23	1135072	3527275	+	3392470	2392203
	33	3p-23	ssa03	52810030	53477050	ssa23	480309	1118436	+	667020	638127
	34	3q-6p	ssa03	53495240	93531790	ssa06	8301269	47668910	-	40036550	39367641
	35	3q-6p	ssa03	93558570	97835700	ssa06	3952370	8241276	+	4277130	4288906
	36	3q-6p	ssa03	97974900	100966100	ssa06	39	2942048	-	2991200	2942009
	37	4p-8q	ssa04	38312	29847540	ssa08	255932	28855040	-	29809228	28599108
	38	4p-10qb	ssa04	35331780	36325950	ssa10	61799410	62656000	-	994170	856590
	39	4q-11qb	ssa04	36421470	44457660	ssa11	87841690	98667700	-	8036190	10826010
	40	4q-13qb	ssa04	44501540	82117470	ssa13	52547320	90390930	-	37615930	37843610
	41	4q-11qb	ssa04	83612640	90461030	ssa11	98686300	110952900	+	6848390	12266600
	42	5p-9qb	ssa05	70135	1265999	ssa09	107601100	108771100	-	1195864	1170000
	43	5p-9qb	ssa05	75703	834318	ssa09	104466300	105811400	-	758615	1345100
	44	5p-9qb	ssa05	2474473	10636820	ssa09	91144240	102370600	-	8162347	11226360
	45	5p-9qb	ssa05	10657170	17305100	ssa09	85390880	91100630	+	6647930	5709750
	46	5p-9qb	ssa05	17306440	18676950	ssa09	83572620	85305200	-	1370510	1732580
	47	5p-9qb	ssa05	22116530	22550137	ssa09	54980900	55375900	-	433607	395000
	48	5p-9qb	ssa05	22699620	46600530	ssa09	55011590	81828100	+	23900910	26816510
	49	6q-15qa	ssa06	48704010	50295530	ssa15	28592200	29928480	+	1591520	1336280
	50	6q-15qa	ssa06	50893770	51146540	ssa15	52432030	52689160	-	252770	257130
	51	6q-15qa	ssa06	51457480	54381540	ssa15	25030000	28470990	-	2924060	3440990
	52	6q-15qa	ssa06	54408650	54623010	ssa15	46531160	46713090	-	214360	181930
	53	6q-15qa	ssa06	54804690	68339100	ssa15	30163780	43909580	+	13534410	13745800
	54	6q-15qa	ssa06	68471390	69373400	ssa15	55901360	56449490	-	902010	548130
	55	6q-15qa	ssa06	70238260	73159520	ssa15	56508270	60075340	+	2921260	3567070
	56	6q-15qa	ssa06	73173920	84773530	ssa15	46741270	55856710	-	11599610	9115440
	57	6q-15qa	ssa06	84777560	94837310	ssa15	14476610	25015210	-	10059750	10538600
	58	7p-18qa	ssa07	717782	936605	ssa18	2214	242327	-	218823	240113
	59	7p-18qa	ssa07	1269428	2060065	ssa18	258752	1068827	+	790637	810075
	60	7p-18qb	ssa07	3172025	5891593	ssa18	79362820	82062000	-	2719568	2699180
	61	7p-18qb	ssa07	7425906	31799110	ssa18	50739800	78880650	+	24373204	28140850
	62	7p-18qb	ssa07	31991800	32827470	ssa18	49593830	50420930	-	835670	827100
	63	7q-17qb	ssa07	33841890	68861700	ssa17	47483410	87468910	+	35019810	39985500
	64	9qa-11qa	ssa09	4293450	6411112	ssa11	41149	4559524	+	2117662	4518375
	65	9qb-11qb	ssa09	102425900	104354200	ssa11	76396600	78450450	-	1928300	2053850
	66	9qc-20qb	ssa09	106087700	107190600	ssa20	936689	1991106	-	1102900	1054417
	67	9qc-20qb	ssa09	109123800	109937500	ssa20	936689	1888146	-	813700	951457
	68	9qc-20qb	ssa09	110271400	110638300	ssa20	44404380	44713480	+	366900	309100
	69	9qc-20qb	ssa09	110661000	111603300	ssa20	43350120	44271640	-	942300	921520
	70	9qc-20qb	ssa09	111667500	155686400	ssa20	44975040	89852440	+	44018900	44877400
	71	9qc-20qb	ssa09	159229000	160084300	ssa20	95887290	96426350	-	855300	539060
	72	9qc-20qb	ssa09	160260200	161040800	ssa20	94440490	95669780	+	780600	1229290
	73	10qa-16qa	ssa10	2225994	2805213	ssa16	58704090	59454070	+	579219	749980
	74	10qa-16qa	ssa10	3803435	5263362	ssa16	53770050	54896720	+	1459927	1126670
	75	10qa-16qa	ssa10	8376875	21192870	ssa16	37950980	53255220	-	12815995	15304240
	76	10qa-23	ssa10	21137530	52021640	ssa23	3973702	33698690	-	30884110	29724988
	77	10qa-23	ssa10	52071140	52292400	ssa23	3538331	3641205	+	221260	102874
	78	10qa-16qa	ssa10	54830250	59228950	ssa16	54942960	58360580	+	4398700	3417620
	79	10qb-16qa	ssa10	67613160	71469710	ssa16	2398630	3563107	-	3856550	1164477
	80	10qb-23	ssa10	72220060	73879560	ssa23	42020270	43646050	-	1659500	1625780
	81	10qa-23	ssa10	73912140	75037690	ssa23	40595820	41804600	+	1125550	1208780
	82	10qb-23	ssa10	75045100	81584190	ssa23	33725860	40420670	-	6539090	6694810
	83	10qb-16qa	ssa10	81580740	118258400	ssa16	2890198	37929640	-	36677660	35039442
	84	10qb-16qa	ssa10	118902000	120065300	ssa16	843519	1518764	+	1163300	675245
	85	10qb-23	ssa10	120080300	120444200	ssa23	43651330	44055490	-	363900	404160
	86	10qb-16qa	ssa10	120454500	120987600	ssa16	1713870	2330491	-	533100	616621
	87	10qa-23	ssa10	121187200	121850700	ssa23	44055290	44608560	-	663500	553270
	88	10qb-23	ssa10	121862200	125860100	ssa23	44669090	52453410	+	3997900	7784320
	89	11qa-26	ssa11	4838684	10238750	ssa26	5055481	10861950	+	5400066	5806469
	90	11qa-26	ssa11	10255850	14823540	ssa26	10864550	15167510	-	4567690	4302960
	91	11qa-26	ssa11	14834470	58899520	ssa26	15171870	54987680	+	44065050	39815810
	92	12qb-22	ssa12	39188490	43095190	ssa22	369794	4501232	-	3906700	4131438
	93	12qb-22	ssa12	43143110	92273050	ssa22	4553284	52436210	-	49129940	47882926
	94	12qb-22	ssa12	92302090	101660400	ssa22	52447870	63767120	+	9358310	11319250
	95	13qa-15qb	ssa13	72236	4499302	ssa15	107442700	110343300	+	4427066	2900600
	96	13qa-15qb	ssa13	5058643	6171283	ssa15	105785000	106973500	+	1112640	1188500
	97	13qa-15qb	ssa13	6188927	11043560	ssa15	100600200	105674000	-	4854633	5073800
	98	13qa-15qb	ssa13	11055470	14505620	ssa15	75328420	78056110	+	3450150	2727690
	99	13qa-15qb	ssa13	14589530	14704890	ssa15	63254750	63425440	-	115360	170690
	100	13qa-15qb	ssa13	20200850	22584470	ssa15	60105750	63217420	-	2383620	3111670
	101	13qa-15qb	ssa13	22598460	29265740	ssa15	63626380	70194220	+	6667280	6567840
	102	13qa-15qb	ssa13	29296680	45193940	ssa15	79814340	98752000	+	15897260	18937660
	103	13qa-15qb	ssa13	45498480	48093740	ssa15	70603340	72957820	+	2595260	2354480
	104	13qa-15qb	ssa13	48151320	49122690	ssa15	98760100	100588400	+	971370	1828300
	105	13qa-15qb	ssa13	49178950	50925680	ssa15	73781170	75287180	-	1746730	1506010
	106	13qa-15qb	ssa13	50938070	51107830	ssa15	73589120	73748070	+	169760	158950
	107	13qa-15qb	ssa13	51111630	51424070	ssa15	73189070	73558270	-	312440	369200
	108	14qb-27	ssa14	54936380	56744780	ssa27	4050004	5903580	+	1808400	1853576
	109	14qb-27	ssa14	56812070	59940410	ssa27	459579	3928262	+	3128340	3468683
	110	14qb-27	ssa14	59988320	62410540	ssa27	6100684	8358543	+	2422220	2257859
	111	14qb-27	ssa14	62423830	62794040	ssa27	8428768	8776092	-	370210	347324
	112	14qb-27	ssa14	62809100	78244890	ssa27	8766410	22966240	+	15435790	14199830
	113	14qb-27	ssa14	78266690	92725670	ssa27	23043720	37158390	-	14458980	14114670
	114	14qb-27	ssa14	92829740	97149090	ssa27	37171750	41877310	+	4319350	4705560
	115	14qb-27	ssa14	97657700	101974900	ssa27	41928060	45286470	-	4317200	3358410
	116	15qa-24	ssa15	597176	2220450	ssa24	434147	1757991	-	1623274	1323844
	117	15qa-24	ssa15	3137987	13823120	ssa24	40900604	49278710	+	10685133	8378106
	118	16qb-17qa	ssa16	20862560	25575250	ssa17	22808	5156374	+	4712690	5133566
	119	16qb-17qa	ssa16	60249120	96471550	ssa17	6252221	46936200	+	36222430	40683979
	120	18qa-19qb	ssa18	1832325	4076767	ssa19	67119010	69221860	-	2244442	2102850
	121	19qa-29	ssa19	7743612	14709730	ssa29	27731590	36457360	+	6966118	8725770
	122	19qa-29	ssa19	16582140	19144930	ssa29	166386	2688623	-	2562790	2522237
	123	19qa-29	ssa19	19194300	31385170	ssa29	2732208	13974820	+	12190870	11242612
	124	19qa-29	ssa19	31413720	31900330	ssa29	14254110	14899790	-	486610	645680
	125	19qa-29	ssa19	31915940	32050290	ssa29	15679970	15964520	-	134350	284550
	126	19qb-28	ssa19	32463700	42330960	ssa28	36617390	41282970	-	9867260	4665580
	127	19qb-28	ssa19	42349080	55311580	ssa28	342771	13345280	-	12962500	13002509
	128	19qb-29	ssa19	69402050	81870130	ssa29	16592350	27730310	-	12468080	11137960
	129	19qb-29	ssa19	81913640	87732490	ssa29	36541290	41816660	+	5818850	5275370
	130	19qa-19qb	ssa19	231884	3063394	ssa19	55333000	57913770	-	2831510	2580770
	131	19qa-19qb	ssa19	3095202	4580688	ssa19	57970270	59622230	-	1485486	1651960
	132	19qa-19qb	ssa19	6673088	7104157	ssa19	65919130	66355520	-	431069	436390
	133	20qa-24	ssa20	2000542	5270825	ssa24	1797178	4604349	-	3270283	2807171
	134	20qa-24	ssa20	6313978	6610733	ssa24	36314090	36508750	-	296755	194660
	135	20qa-24	ssa20	6654663	8171514	ssa24	36517880	38124510	+	1516851	1606630
	136	20qa-24	ssa20	8189250	30942140	ssa24	14417820	36205030	-	22752890	21787210
	137	20qa-24	ssa20	30953670	31547410	ssa24	13805570	14384760	+	593740	579190
	138	20qa-24	ssa20	31552660	39465320	ssa24	6737307	13756600	-	7912660	7019293
	139	20qa-24	ssa20	39487870	41254970	ssa24	5830362	6754657	+	1767100	924295
	140	20qa-24	ssa20	41268940	42707300	ssa24	4621982	5817669	-	1438360	1195687
	141	21-25	ssa21	161915	3983696	ssa25	545364	3234376	-	3821781	2689012
	142	21-25	ssa21	4505598	5882293	ssa25	4100155	5060761	+	1376695	960606
	143	21-25	ssa21	5890353	9139846	ssa25	5180727	7595372	-	3249493	2414645
	144	21-25	ssa21	9339611	17117410	ssa25	7651932	15186790	+	7777799	7534858
	145	21-25	ssa21	17164330	51082960	ssa25	15189660	47996690	-	33918630	32807030
	146	21-25	ssa21	51916760	52271480	ssa25	48284420	48765500	-	354720	481080
	147	21-25	ssa21	52375070	59714040	ssa25	48954870	54313450	+	7338970	5358580

## Sheet: Table S5
Orthogroup	AB	Species	Ensembl ID	Chromosome/Scaffold	Start location	End location	Strand	nSsal	nOmyk	Synteny	Phylogeny	ProxiSynteny	ProxiPhylogeny	Reciprocal
Ens106s00001.372	A	Ssal	ENSSSAG00000009676	Ssa04	45450189	45451352	+	1	1	((Omy10,Ssa04),(Omy12,Ssa13))	NA	((Omy10,Ssa04),(Omy12,Ssa13))	AORe	FALSE
Ens106s00001.372	A	Omyk	ENSOMYG00000038703	Omy10	41474987	41476150	-	1	1	((Omy10,Ssa04),(Omy12,Ssa13))	NA	((Omy10,Ssa04),(Omy12,Ssa13))	AORe	FALSE
Ens106s00001.377	NA	Ssal	ENSSSAG00000101679	Ssa18	995796	997140	+	19	21	NA	NA	NA	NA	NA
Ens106s00001.377	NA	Omyk	ENSOMYG00000019304	Omy22	43954409	44009807	-	19	21	NA	NA	((Omy03,Ssa25),(Omy22,Ssa21))	AORe	NA
Ens106s00001.377	NA	Omyk	ENSOMYG00000019294	Omy22	43953864	43955386	-	19	21	NA	NA	((Omy03,Ssa25),(Omy22,Ssa21))	AORe	NA
Ens106s00001.377	NA	Ssal	ENSSSAG00000048187	SsaCAJNNT020001670.1	184636	186277	-	19	21	NA	NA	NA	NA	NA
Ens106s00001.377	NA	Ssal	ENSSSAG00000106507	Ssa18	1037104	1038151	-	19	21	NA	NA	NA	NA	NA
Ens106s00001.377	NA	Ssal	ENSSSAG00000092945	Ssa04	90341026	90401456	-	19	21	NA	NA	((Omy10,Ssa04),(OmyY,Ssa11))	AORe	NA
Ens106s00001.377	NA	Omyk	ENSOMYG00000023989	Omy22	45362664	45365714	-	19	21	NA	NA	((Omy03,Ssa25),(Omy22,Ssa21))	AORe	NA
Ens106s00001.377	NA	Omyk	ENSOMYG00000068191	Omy22	45402018	45447973	+	19	21	NA	NA	((Omy03,Ssa25),(Omy22,Ssa21))	AORe	NA
Ens106s00001.377	NA	Ssal	ENSSSAG00000089995	Ssa21	49515408	49558375	-	19	21	NA	NA	((Omy03,Ssa25),(Omy22,Ssa21))	AORe	NA
Ens106s00001.377	NA	Omyk	ENSOMYG00000054676	Omy22	43840337	43905172	-	19	21	NA	NA	((Omy03,Ssa25),(Omy22,Ssa21))	AORe	NA
Ens106s00001.377	NA	Omyk	ENSOMYG00000069828	Omy22	43626374	43642807	+	19	21	NA	NA	((Omy03,Ssa25),(Omy22,Ssa21))	AORe	NA
Ens106s00001.377	NA	Omyk	ENSOMYG00000062273	Omy22	43712487	43713541	+	19	21	NA	NA	((Omy03,Ssa25),(Omy22,Ssa21))	AORe	NA
Ens106s00001.377	NA	Ssal	ENSSSAG00000110345	Ssa21	49429942	49440000	+	19	21	NA	NA	((Omy03,Ssa25),(Omy22,Ssa21))	AORe	NA
Ens106s00001.377	NA	Omyk	ENSOMYG00000050773	Omy22	43799733	43800695	-	19	21	NA	NA	((Omy03,Ssa25),(Omy22,Ssa21))	AORe	NA
Ens106s00001.377	NA	Omyk	ENSOMYG00000050388	Omy22	43767627	43768589	-	19	21	NA	NA	((Omy03,Ssa25),(Omy22,Ssa21))	AORe	NA
Ens106s00001.377	NA	Ssal	ENSSSAG00000068512	SsaCAJNNT020002261.1	16857	17984	-	19	21	NA	NA	NA	NA	NA
Ens106s00001.377	NA	Ssal	ENSSSAG00000068508	Ssa21	49100092	49102117	-	19	21	NA	NA	((Omy03,Ssa25),(Omy22,Ssa21))	AORe	NA
Ens106s00001.377	NA	Ssal	ENSSSAG00000107467	Ssa21	51669541	51671319	-	19	21	NA	NA	((Omy03,Ssa25),(Omy22,Ssa21))	AORe	NA
Ens106s00001.377	NA	Omyk	ENSOMYG00000049892	Omy22	43993295	43994976	+	19	21	NA	NA	((Omy03,Ssa25),(Omy22,Ssa21))	AORe	NA
Ens106s00001.377	NA	Ssal	ENSSSAG00000103291	Ssa21	49502779	49504655	-	19	21	NA	NA	((Omy03,Ssa25),(Omy22,Ssa21))	AORe	NA
Ens106s00001.377	NA	Omyk	ENSOMYG00000023969	Omy22	43586334	43612581	-	19	21	NA	NA	((Omy03,Ssa25),(Omy22,Ssa21))	AORe	NA
Ens106s00001.377	NA	Ssal	ENSSSAG00000113440	Ssa21	49320852	49321908	+	19	21	NA	NA	((Omy03,Ssa25),(Omy22,Ssa21))	AORe	NA
Ens106s00001.377	NA	Omyk	ENSOMYG00000035388	Omy22	45251332	45252728	+	19	21	NA	NA	((Omy03,Ssa25),(Omy22,Ssa21))	AORe	NA
Ens106s00001.377	NA	Omyk	ENSOMYG00000048025	Omy22	45358979	45388671	+	19	21	NA	NA	((Omy03,Ssa25),(Omy22,Ssa21))	AORe	NA
Ens106s00001.377	NA	Omyk	ENSOMYG00000035384	Omy22	45274383	45344406	-	19	21	NA	NA	((Omy03,Ssa25),(Omy22,Ssa21))	AORe	NA
Ens106s00001.377	NA	Ssal	ENSSSAG00000084917	Ssa21	51532870	51614639	+	19	21	NA	NA	((Omy03,Ssa25),(Omy22,Ssa21))	AORe	NA
Ens106s00001.377	NA	Ssal	ENSSSAG00000095079	Ssa21	51108652	51110639	+	19	21	NA	NA	((Omy03,Ssa25),(Omy22,Ssa21))	AORe	NA
Ens106s00001.377	NA	Ssal	ENSSSAG00000101012	SsaCAJNNT020002860.1	48410	50372	-	19	21	NA	NA	NA	NA	NA
Ens106s00001.377	NA	Ssal	ENSSSAG00000094644	Ssa18	1057257	1088104	-	19	21	NA	NA	NA	NA	NA
Ens106s00001.377	NA	Omyk	ENSOMYG00000055148	Omy04	4594931	4610028	-	19	21	NA	NA	((Omy04,Ssa06),(Omy08,Ssa15))	AORe	NA
Ens106s00001.377	NA	Ssal	ENSSSAG00000090879	SsaCAJNNT020002959.1	157179	189481	+	19	21	NA	NA	NA	NA	NA
Ens106s00001.377	NA	Ssal	ENSSSAG00000082951	Ssa13	114172444	114200698	-	19	21	NA	NA	((Omy05,Ssa01),(Omy12,Ssa13))	cryptic	NA
Ens106s00001.377	NA	Omyk	ENSOMYG00000019310	Omy22	43942041	43972228	+	19	21	NA	NA	((Omy03,Ssa25),(Omy22,Ssa21))	AORe	NA
Ens106s00001.377	NA	Ssal	ENSSSAG00000115040	Ssa21	49285865	49381806	-	19	21	NA	NA	((Omy03,Ssa25),(Omy22,Ssa21))	AORe	NA
Ens106s00001.377	NA	Omyk	ENSOMYG00000071348	Omy04	4603828	4605028	+	19	21	NA	NA	((Omy04,Ssa06),(Omy08,Ssa15))	AORe	NA
Ens106s00001.377	NA	Omyk	ENSOMYG00000055723	Omy04	4548985	4574920	+	19	21	NA	NA	((Omy04,Ssa06),(Omy08,Ssa15))	AORe	NA
Ens106s00001.377	NA	Omyk	ENSOMYG00000060526	Omy22	45511395	45512897	+	19	21	NA	NA	((Omy03,Ssa25),(Omy22,Ssa21))	AORe	NA
Ens106s00001.377	NA	Omyk	ENSOMYG00000061875	Omy22	43680669	43734237	-	19	21	NA	NA	((Omy03,Ssa25),(Omy22,Ssa21))	AORe	NA
Ens106s00001.377	NA	Ssal	ENSSSAG00000076399	Ssa13	89487833	89489705	+	19	21	NA	NA	((Omy10,Ssa04),(Omy12,Ssa13))	AORe	NA
Ens106s00001.377	NA	Omyk	ENSOMYG00000049654	Omy12	23437718	23438662	-	19	21	NA	NA	((Omy10,Ssa04),(Omy12,Ssa13))	AORe	NA
Ens106s00002.925	NA	Ssal	ENSSSAG00000095097	Ssa12	8198264	8216457	-	1	0	NA	NA	((Omy13,Ssa02),(Omy17,Ssa12))	AORe	NA
Ens106s00002.930	NA	Ssal	ENSSSAG00000091777	Ssa12	8217848	8222961	-	1	0	NA	NA	((Omy13,Ssa02),(Omy17,Ssa12))	AORe	NA
Ens106s00002.934	NA	Ssal	ENSSSAG00000108423	SsaCAJNNT020002019.1	1119428	1150809	+	177	47	NA	NA	NA	NA	NA
Ens106s00002.934	NA	Ssal	ENSSSAG00000094481	SsaCAJNNT020001769.1	300339	344771	-	177	47	NA	NA	NA	NA	NA
Ens106s00002.934	NA	Ssal	ENSSSAG00000117789	SsaCAJNNT020001763.1	219128	291746	+	177	47	NA	NA	NA	NA	NA
Ens106s00002.934	NA	Ssal	ENSSSAG00000097044	SsaCAJNNT020001657.1	63368	149342	+	177	47	NA	NA	NA	NA	NA
Ens106s00002.934	NA	Ssal	ENSSSAG00000118452	SsaCAJNNT020002053.1	15313	54145	-	177	47	NA	NA	NA	NA	NA
Ens106s00002.934	NA	Ssal	ENSSSAG00000086161	Ssa02	87658084	87685619	-	177	47	NA	NA	NA	NA	NA
Ens106s00002.934	NA	Ssal	ENSSSAG00000016207	SsaCAJNNT020001900.1	243278	245290	+	177	47	NA	NA	NA	NA	NA
Ens106s00002.934	NA	Ssal	ENSSSAG00000093237	SsaCAJNNT020002053.1	87237	266557	+	177	47	NA	NA	NA	NA	NA
Ens106s00002.934	NA	Ssal	ENSSSAG00000097099	SsaCAJNNT020002415.1	23648	30226	+	177	47	NA	NA	NA	NA	NA
Ens106s00002.934	NA	Omyk	ENSOMYG00000001441	Omy07	29454642	29529466	-	177	47	NA	NA	((Omy07,Ssa22),(Omy17,Ssa12))	AORe	NA
Ens106s00002.934	NA	Omyk	ENSOMYG00000008408	Omy13	1312942	1317154	+	177	47	NA	NA	((Omy13,Ssa02),(Omy17,Ssa12))	LORe	NA
Ens106s00002.934	NA	Omyk	ENSOMYG00000039101	Omy10	75053825	75055575	-	177	47	NA	NA	((Omy10,Ssa04),(Omy19,Ssa08))	cryptic	NA
Ens106s00002.934	NA	Ssal	ENSSSAG00000104996	SsaCAJNNT020002130.1	285176	388992	-	177	47	NA	NA	NA	NA	NA
Ens106s00002.934	NA	Ssal	ENSSSAG00000107823	SsaCAJNNT020002130.1	354934	426269	-	177	47	NA	NA	NA	NA	NA
Ens106s00002.934	NA	Ssal	ENSSSAG00000116620	Ssa02	85844072	85974145	+	177	47	NA	NA	NA	NA	NA
Ens106s00002.934	NA	Ssal	ENSSSAG00000089978	SsaCAJNNT020004198.1	671561	682440	+	177	47	NA	NA	NA	NA	NA
Ens106s00002.934	NA	Ssal	ENSSSAG00000107519	Ssa02	91548303	91632283	-	177	47	NA	NA	((Omy13,Ssa02),(Omy17,Ssa12))	LORe	NA
Ens106s00002.934	NA	Ssal	ENSSSAG00000017950	SsaCAJNNT020000874.1	201377	203942	+	177	47	NA	NA	NA	NA	NA
Ens106s00002.934	NA	Ssal	ENSSSAG00000092668	Ssa02	90106411	90176251	+	177	47	NA	NA	NA	NA	NA
Ens106s00002.934	NA	Omyk	ENSOMYG00000053530	Omy13	28387100	28391998	+	177	47	NA	NA	((Omy13,Ssa02),(Omy17,Ssa12))	AORe	NA
Ens106s00002.934	NA	Ssal	ENSSSAG00000090094	Ssa06	11934138	11999922	-	177	47	NA	NA	((Omy12,Ssa03),(Omy13,Ssa06))	LORe	NA
Ens106s00002.934	NA	Omyk	ENSOMYG00000024615	Omy12	94292087	94492613	+	177	47	NA	NA	((Omy12,Ssa03),(Omy13,Ssa06))	LORe	NA
Ens106s00002.934	NA	Omyk	ENSOMYG00000052845	Omy12	94360391	94369430	-	177	47	NA	NA	((Omy12,Ssa03),(Omy13,Ssa06))	LORe	NA
Ens106s00002.934	NA	Ssal	ENSSSAG00000082421	Ssa06	11872944	11887493	-	177	47	NA	NA	((Omy12,Ssa03),(Omy13,Ssa06))	LORe	NA
Ens106s00002.934	NA	Ssal	ENSSSAG00000104511	Ssa02	68480951	68490951	-	177	47	NA	NA	((Omy13,Ssa02),(Omy17,Ssa12))	LORe	NA
Ens106s00002.934	NA	Ssal	ENSSSAG00000044730	SsaCAJNNT020000988.1	549	25367	+	177	47	NA	NA	NA	NA	NA
Ens106s00002.934	NA	Ssal	ENSSSAG00000115924	SsaCAJNNT020002760.1	2186	21495	-	177	47	NA	NA	NA	NA	NA
Ens106s00002.934	NA	Omyk	ENSOMYG00000007859	Omy17	13267420	13273249	+	177	47	NA	NA	((Omy13,Ssa02),(Omy17,Ssa12))	LORe	NA
Ens106s00002.934	NA	Ssal	ENSSSAG00000003091	Ssa06	11840866	11853473	+	177	47	NA	NA	((Omy12,Ssa03),(Omy13,Ssa06))	LORe	NA
Ens106s00002.934	NA	Omyk	ENSOMYG00000026770	Omy17	3146696	3225701	+	177	47	NA	NA	((Omy13,Ssa02),(Omy17,Ssa12))	LORe	NA
Ens106s00002.934	NA	Ssal	ENSSSAG00000023026	SsaCAJNNT020002462.1	59645	72135	-	177	47	NA	NA	NA	NA	NA
Ens106s00002.934	NA	Ssal	ENSSSAG00000082659	SsaCAJNNT020002065.1	31797	35642	-	177	47	NA	NA	NA	NA	NA
Ens106s00002.934	NA	Ssal	ENSSSAG00000121350	SsaCAJNNT020001651.1	157346	319191	+	177	47	NA	NA	NA	NA	NA
Ens106s00002.934	NA	Ssal	ENSSSAG00000121080	SsaCAJNNT020002462.1	70703	100737	-	177	47	NA	NA	NA	NA	NA
Ens106s00002.934	NA	Ssal	ENSSSAG00000093059	SsaCAJNNT020002477.1	417551	427174	+	177	47	NA	NA	NA	NA	NA
Ens106s00002.934	NA	Ssal	ENSSSAG00000091783	SsaCAJNNT020002404.1	175409	238541	-	177	47	NA	NA	NA	NA	NA
Ens106s00002.934	NA	Ssal	ENSSSAG00000086108	Ssa02	87780969	87976129	+	177	47	NA	NA	NA	NA	NA
Ens106s00002.934	NA	Ssal	ENSSSAG00000112719	SsaCAJNNT020003322.1	478134	574384	-	177	47	NA	NA	NA	NA	NA
Ens106s00002.934	NA	Ssal	ENSSSAG00000087169	Ssa03	105576720	105583045	+	177	47	NA	NA	NA	NA	NA
Ens106s00002.934	NA	Ssal	ENSSSAG00000094424	SsaCAJNNT020001353.1	193831	199634	+	177	47	NA	NA	NA	NA	NA
Ens106s00002.934	NA	Ssal	ENSSSAG00000101723	SsaCAJNNT020002412.1	29873	31651	-	177	47	NA	NA	NA	NA	NA
Ens106s00002.934	NA	Ssal	ENSSSAG00000057423	SsaCAJNNT020001775.1	97692	99311	+	177	47	NA	NA	NA	NA	NA
Ens106s00002.934	NA	Ssal	ENSSSAG00000107394	SsaCAJNNT020004199.1	309635	380344	-	177	47	NA	NA	NA	NA	NA
Ens106s00002.934	NA	Ssal	ENSSSAG00000105103	SsaCAJNNT020004199.1	698245	708849	+	177	47	NA	NA	NA	NA	NA
Ens106s00002.934	NA	Ssal	ENSSSAG00000100668	SsaCAJNNT020004199.1	151617	434661	-	177	47	NA	NA	NA	NA	NA
Ens106s00002.934	NA	Ssal	ENSSSAG00000117083	Ssa02	88872370	88890731	+	177	47	NA	NA	NA	NA	NA
Ens106s00002.934	NA	Ssal	ENSSSAG00000094915	SsaCAJNNT020001768.1	188985	202004	+	177	47	NA	NA	NA	NA	NA
Ens106s00002.934	NA	Ssal	ENSSSAG00000055820	Ssa03	105113170	105226284	+	177	47	NA	NA	NA	NA	NA
Ens106s00002.934	NA	Ssal	ENSSSAG00000115757	SsaCAJNNT020000890.1	260071	286510	-	177	47	NA	NA	NA	NA	NA
Ens106s00002.934	NA	Ssal	ENSSSAG00000115107	SsaCAJNNT020000890.1	619691	628074	-	177	47	NA	NA	NA	NA	NA
Ens106s00002.934	NA	Ssal	ENSSSAG00000106790	Ssa02	90054529	90139695	+	177	47	NA	NA	NA	NA	NA
Ens106s00002.934	NA	Omyk	ENSOMYG00000003568	Omy13	27624998	27628833	+	177	47	NA	NA	NA	NA	NA
Ens106s00002.934	NA	Ssal	ENSSSAG00000119329	Ssa02	85748844	85805120	+	177	47	NA	NA	NA	NA	NA
Ens106s00002.934	NA	Ssal	ENSSSAG00000111712	Ssa12	18904095	18949755	-	177	47	NA	NA	((Omy13,Ssa02),(Omy17,Ssa12))	LORe	NA
Ens106s00002.934	NA	Ssal	ENSSSAG00000116253	SsaCAJNNT020004199.1	201905	215927	-	177	47	NA	NA	NA	NA	NA
Ens106s00002.934	NA	Ssal	ENSSSAG00000001404	SsaCAJNNT020004198.1	607297	637139	+	177	47	NA	NA	NA	NA	NA
Ens106s00002.934	NA	Ssal	ENSSSAG00000110180	Ssa02	87383732	87450181	-	177	47	NA	NA	NA	NA	NA
Ens106s00002.934	NA	Omyk	ENSOMYG00000038640	Omy13	1592138	1708056	+	177	47	NA	NA	((Omy13,Ssa02),(Omy17,Ssa12))	LORe	NA
Ens106s00002.934	NA	Ssal	ENSSSAG00000096260	Ssa02	91195805	91750169	-	177	47	NA	NA	((Omy13,Ssa02),(Omy17,Ssa12))	LORe	NA
Ens106s00002.934	NA	Ssal	ENSSSAG00000117245	Ssa02	87828486	87994007	-	177	47	NA	NA	NA	NA	NA
Ens106s00002.934	NA	Ssal	ENSSSAG00000111026	SsaCAJNNT020004199.1	579495	588233	+	177	47	NA	NA	NA	NA	NA
Ens106s00002.934	NA	Omyk	ENSOMYG00000027911	Omy04	4430063	4440254	+	177	47	NA	NA	((Omy04,Ssa06),(Omy08,Ssa15))	AORe	NA
Ens106s00002.934	NA	Omyk	ENSOMYG00000003880	Omy13	26579556	26588136	-	177	47	NA	NA	((Omy13,Ssa02),(Omy17,Ssa12))	AORe	NA
Ens106s00002.934	NA	Ssal	ENSSSAG00000100446	Ssa02	88758516	88800573	-	177	47	NA	NA	NA	NA	NA
Ens106s00002.934	NA	Ssal	ENSSSAG00000115962	Ssa02	89943131	89953051	-	177	47	NA	NA	NA	NA	NA
Ens106s00002.934	NA	Ssal	ENSSSAG00000104667	SsaCAJNNT020001363.1	80191	122883	-	177	47	NA	NA	NA	NA	NA
Ens106s00002.934	NA	Ssal	ENSSSAG00000108959	SsaCAJNNT020002129.1	6345	12351	-	177	47	NA	NA	NA	NA	NA
Ens106s00002.934	NA	Ssal	ENSSSAG00000115766	SsaCAJNNT020002404.1	175100	258654	+	177	47	NA	NA	NA	NA	NA
Ens106s00002.934	NA	Ssal	ENSSSAG00000114345	SsaCAJNNT020002130.1	417432	451127	-	177	47	NA	NA	NA	NA	NA
Ens106s00002.934	NA	Ssal	ENSSSAG00000121235	SsaCAJNNT020001288.1	100313	227430	+	177	47	NA	NA	NA	NA	NA
Ens106s00002.934	NA	Ssal	ENSSSAG00000107965	Ssa03	104299712	105086317	-	177	47	NA	NA	NA	NA	NA
Ens106s00002.934	NA	Omyk	ENSOMYG00000051522	Omy13	28187501	28671794	-	177	47	NA	NA	((Omy13,Ssa02),(Omy17,Ssa12))	AORe	NA
Ens106s00002.934	NA	Ssal	ENSSSAG00000055809	Ssa02	89258722	89260613	+	177	47	NA	NA	NA	NA	NA
Ens106s00002.934	NA	Ssal	ENSSSAG00000017067	SsaCAJNNT020002040.1	225319	284070	-	177	47	NA	NA	NA	NA	NA
Ens106s00002.934	NA	Ssal	ENSSSAG00000097333	SsaCAJNNT020004199.1	151583	161404	-	177	47	NA	NA	NA	NA	NA
Ens106s00002.934	NA	Ssal	ENSSSAG00000107597	SsaCAJNNT020001981.1	340006	505511	-	177	47	NA	NA	NA	NA	NA
Ens106s00002.934	NA	Ssal	ENSSSAG00000114038	SsaCAJNNT020000898.1	116943	406358	-	177	47	NA	NA	NA	NA	NA
Ens106s00002.934	NA	Omyk	ENSOMYG00000004131	Omy13	26709364	26719417	-	177	47	NA	NA	NA	NA	NA
Ens106s00002.934	NA	Ssal	ENSSSAG00000080860	SsaCAJNNT020001826.1	29301	71783	-	177	47	NA	NA	NA	NA	NA
Ens106s00002.934	NA	Ssal	ENSSSAG00000104010	SsaCAJNNT020002124.1	160422	166704	+	177	47	NA	NA	NA	NA	NA
Ens106s00002.934	NA	Ssal	ENSSSAG00000082886	Ssa02	88253180	88261481	-	177	47	NA	NA	NA	NA	NA
Ens106s00002.934	NA	Ssal	ENSSSAG00000116315	Ssa02	88150112	88206147	+	177	47	NA	NA	NA	NA	NA
Ens106s00002.934	NA	Omyk	ENSOMYG00000039847	Omy13	802059	809296	+	177	47	NA	NA	((Omy13,Ssa02),(Omy17,Ssa12))	LORe	NA
Ens106s00002.934	NA	Omyk	ENSOMYG00000038508	Omy13	1231589	1237688	+	177	47	NA	NA	((Omy13,Ssa02),(Omy17,Ssa12))	LORe	NA
Ens106s00002.934	NA	Ssal	ENSSSAG00000043525	SsaCAJNNT020002468.1	33335	34898	-	177	47	NA	NA	NA	NA	NA
Ens106s00002.934	NA	Ssal	ENSSSAG00000099518	Ssa02	90490909	90500178	+	177	47	NA	NA	NA	NA	NA
Ens106s00002.934	NA	Ssal	ENSSSAG00000094960	SsaCAJNNT020001949.1	24479	37066	+	177	47	NA	NA	NA	NA	NA
Ens106s00002.934	NA	Ssal	ENSSSAG00000113023	Ssa02	85940428	85996622	-	177	47	NA	NA	NA	NA	NA
Ens106s00002.934	NA	Omyk	ENSOMYG00000003633	Omy13	28338815	28347901	+	177	47	NA	NA	((Omy13,Ssa02),(Omy17,Ssa12))	AORe	NA
Ens106s00002.934	NA	Omyk	ENSOMYG00000065955	OmyJAAXML020000606.1	39428	50003	+	177	47	NA	NA	NA	NA	NA
Ens106s00002.934	NA	Ssal	ENSSSAG00000109860	SsaCAJNNT020000885.1	97156	420028	-	177	47	NA	NA	NA	NA	NA
Ens106s00002.934	NA	Ssal	ENSSSAG00000111982	Ssa03	105514513	105625618	-	177	47	NA	NA	NA	NA	NA
Ens106s00002.934	NA	Ssal	ENSSSAG00000110296	SsaCAJNNT020003322.1	986433	988448	-	177	47	NA	NA	NA	NA	NA
Ens106s00002.934	NA	Ssal	ENSSSAG00000100044	SsaCAJNNT020002484.1	221693	223632	+	177	47	NA	NA	NA	NA	NA
Ens106s00002.934	NA	Ssal	ENSSSAG00000084647	SsaCAJNNT020001287.1	301213	302161	+	177	47	NA	NA	NA	NA	NA
Ens106s00002.934	NA	Ssal	ENSSSAG00000096115	Ssa02	87717280	87724978	+	177	47	NA	NA	NA	NA	NA
Ens106s00002.934	NA	Omyk	ENSOMYG00000050006	Omy27	2881369	2889166	+	177	47	NA	NA	((Omy24,Ssa09),(Omy27,Ssa20))	AORe	NA
Ens106s00002.934	NA	Ssal	ENSSSAG00000118243	SsaCAJNNT020001286.1	72691	126061	-	177	47	NA	NA	NA	NA	NA
Ens106s00002.934	NA	Ssal	ENSSSAG00000090494	SsaCAJNNT020004193.1	412009	477599	-	177	47	NA	NA	NA	NA	NA
Ens106s00002.934	NA	Ssal	ENSSSAG00000087827	SsaCAJNNT020001653.1	393888	399812	+	177	47	NA	NA	NA	NA	NA
Ens106s00002.934	NA	Ssal	ENSSSAG00000088236	SsaCAJNNT020001736.1	45258	46675	+	177	47	NA	NA	NA	NA	NA
Ens106s00002.934	NA	Ssal	ENSSSAG00000114760	SsaCAJNNT020000722.1	215583	355882	-	177	47	NA	NA	NA	NA	NA
Ens106s00002.934	NA	Ssal	ENSSSAG00000101517	SsaCAJNNT020004193.1	337110	525407	-	177	47	NA	NA	NA	NA	NA
Ens106s00002.934	NA	Ssal	ENSSSAG00000106863	SsaCAJNNT020001771.1	3685	30308	+	177	47	NA	NA	NA	NA	NA
Ens106s00002.934	NA	Ssal	ENSSSAG00000088050	SsaCAJNNT020004198.1	8208	25820	+	177	47	NA	NA	NA	NA	NA
Ens106s00002.934	NA	Ssal	ENSSSAG00000120905	SsaCAJNNT020003322.1	949519	995309	-	177	47	NA	NA	NA	NA	NA
Ens106s00002.934	NA	Ssal	ENSSSAG00000112861	Ssa02	87733839	87744380	-	177	47	NA	NA	NA	NA	NA
Ens106s00002.934	NA	Ssal	ENSSSAG00000100790	SsaCAJNNT020002183.1	318429	372029	-	177	47	NA	NA	NA	NA	NA
Ens106s00002.934	NA	Ssal	ENSSSAG00000098925	SsaCAJNNT020002049.1	457533	459474	+	177	47	NA	NA	NA	NA	NA
Ens106s00002.934	NA	Ssal	ENSSSAG00000083094	SsaCAJNNT020002222.1	41846	43483	-	177	47	NA	NA	NA	NA	NA
Ens106s00002.934	NA	Ssal	ENSSSAG00000063594	SsaCAJNNT020002115.1	76499	123769	+	177	47	NA	NA	NA	NA	NA
Ens106s00002.934	NA	Ssal	ENSSSAG00000098485	SsaCAJNNT020002589.1	56590	58446	+	177	47	NA	NA	NA	NA	NA
Ens106s00002.934	NA	Ssal	ENSSSAG00000014679	SsaCAJNNT020001402.1	37865	39165	+	177	47	NA	NA	NA	NA	NA
Ens106s00002.934	NA	Ssal	ENSSSAG00000112401	SsaCAJNNT020000874.1	143352	245539	+	177	47	NA	NA	NA	NA	NA
Ens106s00002.934	NA	Ssal	ENSSSAG00000086621	SsaCAJNNT020004199.1	803650	820509	-	177	47	NA	NA	NA	NA	NA
Ens106s00002.934	NA	Ssal	ENSSSAG00000101467	Ssa02	86297479	86343582	+	177	47	NA	NA	NA	NA	NA
Ens106s00002.934	NA	Omyk	ENSOMYG00000074520	Omy13	25856567	25871414	+	177	47	NA	NA	((Omy13,Ssa02),(Omy17,Ssa12))	AORe	NA
Ens106s00002.934	NA	Ssal	ENSSSAG00000060989	Ssa02	86122748	86124754	+	177	47	NA	NA	NA	NA	NA
Ens106s00002.934	NA	Ssal	ENSSSAG00000102653	Ssa02	89909615	90176245	+	177	47	NA	NA	NA	NA	NA
Ens106s00002.934	NA	Omyk	ENSOMYG00000033074	Omy27	2834104	2840190	+	177	47	NA	NA	((Omy24,Ssa09),(Omy27,Ssa20))	AORe	NA
Ens106s00002.934	NA	Omyk	ENSOMYG00000076476	Omy17	2955628	3135353	-	177	47	NA	NA	((Omy13,Ssa02),(Omy17,Ssa12))	LORe	NA
Ens106s00002.934	NA	Omyk	ENSOMYG00000061226	Omy13	1155428	1161952	+	177	47	NA	NA	((Omy13,Ssa02),(Omy17,Ssa12))	LORe	NA
Ens106s00002.934	NA	Omyk	ENSOMYG00000026704	Omy13	926336	929970	-	177	47	NA	NA	((Omy13,Ssa02),(Omy17,Ssa12))	LORe	NA
Ens106s00002.934	NA	Omyk	ENSOMYG00000053604	Omy13	821232	999543	+	177	47	NA	NA	((Omy13,Ssa02),(Omy17,Ssa12))	LORe	NA
Ens106s00002.934	NA	Omyk	ENSOMYG00000026743	OmyJAAXML020000324.1	40157	41464	+	177	47	NA	NA	NA	NA	NA
Ens106s00002.934	NA	Omyk	ENSOMYG00000003547	Omy13	26464808	26471889	+	177	47	NA	NA	((Omy13,Ssa02),(Omy17,Ssa12))	AORe	NA
Ens106s00002.934	NA	Omyk	ENSOMYG00000004689	Omy13	26141170	26154900	+	177	47	NA	NA	((Omy13,Ssa02),(Omy17,Ssa12))	AORe	NA
Ens106s00002.934	NA	Omyk	ENSOMYG00000003596	Omy13	27695054	27703480	-	177	47	NA	NA	NA	NA	NA
Ens106s00002.934	NA	Omyk	ENSOMYG00000075031	Omy17	3037622	3053727	-	177	47	NA	NA	((Omy13,Ssa02),(Omy17,Ssa12))	LORe	NA
Ens106s00002.934	NA	Ssal	ENSSSAG00000107964	SsaCAJNNT020002028.1	13865	41379	+	177	47	NA	NA	NA	NA	NA
Ens106s00002.934	NA	Ssal	ENSSSAG00000094187	SsaCAJNNT020002407.1	101047	110787	-	177	47	NA	NA	NA	NA	NA
Ens106s00002.934	NA	Ssal	ENSSSAG00000115274	SsaCAJNNT020002040.1	163354	182712	-	177	47	NA	NA	NA	NA	NA
Ens106s00002.934	NA	Ssal	ENSSSAG00000091497	SsaCAJNNT020001294.1	114440	120430	+	177	47	NA	NA	NA	NA	NA
Ens106s00002.934	NA	Ssal	ENSSSAG00000055825	SsaCAJNNT020000907.1	192159	288034	+	177	47	NA	NA	NA	NA	NA
Ens106s00002.934	NA	Ssal	ENSSSAG00000100973	Ssa12	3757967	3799195	-	177	47	NA	NA	((Omy13,Ssa02),(Omy17,Ssa12))	LORe	NA
Ens106s00002.934	NA	Ssal	ENSSSAG00000100665	SsaCAJNNT020001651.1	109971	121395	+	177	47	NA	NA	NA	NA	NA
Ens106s00002.934	NA	Ssal	ENSSSAG00000121706	Ssa02	86191156	86323958	+	177	47	NA	NA	NA	NA	NA
Ens106s00002.934	NA	Ssal	ENSSSAG00000109259	SsaCAJNNT020004198.1	587872	595724	-	177	47	NA	NA	NA	NA	NA
Ens106s00002.934	NA	Ssal	ENSSSAG00000093257	SsaCAJNNT020001807.1	157961	402628	-	177	47	NA	NA	NA	NA	NA
Ens106s00002.934	NA	Ssal	ENSSSAG00000114285	Ssa02	89820924	89910155	-	177	47	NA	NA	NA	NA	NA
Ens106s00002.934	NA	Ssal	ENSSSAG00000086879	SsaCAJNNT020001768.1	16881	52377	-	177	47	NA	NA	NA	NA	NA
Ens106s00002.934	NA	Ssal	ENSSSAG00000094070	SsaCAJNNT020001981.1	357554	363302	+	177	47	NA	NA	NA	NA	NA
Ens106s00002.934	NA	Ssal	ENSSSAG00000046458	SsaCAJNNT020002115.1	158414	163428	-	177	47	NA	NA	NA	NA	NA
Ens106s00002.934	NA	Ssal	ENSSSAG00000054424	SsaCAJNNT020002589.1	41961	47074	+	177	47	NA	NA	NA	NA	NA
Ens106s00002.934	NA	Ssal	ENSSSAG00000112726	SsaCAJNNT020001296.1	35839	274808	-	177	47	NA	NA	NA	NA	NA
Ens106s00002.934	NA	Ssal	ENSSSAG00000097544	SsaCAJNNT020002405.1	51100	56095	+	177	47	NA	NA	NA	NA	NA
Ens106s00002.934	NA	Ssal	ENSSSAG00000112911	SsaCAJNNT020000882.1	516627	523096	+	177	47	NA	NA	NA	NA	NA
Ens106s00002.934	NA	Ssal	ENSSSAG00000088771	Ssa02	91511620	91540352	+	177	47	NA	NA	((Omy13,Ssa02),(Omy17,Ssa12))	LORe	NA
Ens106s00002.934	NA	Ssal	ENSSSAG00000109132	SsaCAJNNT020000871.1	355763	372044	+	177	47	NA	NA	NA	NA	NA
Ens106s00002.934	NA	Ssal	ENSSSAG00000092206	SsaCAJNNT020003322.1	460625	506116	+	177	47	NA	NA	NA	NA	NA
Ens106s00002.934	NA	Ssal	ENSSSAG00000101844	SsaCAJNNT020000890.1	533177	615400	+	177	47	NA	NA	NA	NA	NA
Ens106s00002.934	NA	Ssal	ENSSSAG00000119371	SsaCAJNNT020001591.1	166673	253695	-	177	47	NA	NA	NA	NA	NA
Ens106s00002.934	NA	Ssal	ENSSSAG00000082818	SsaCAJNNT020001775.1	56785	64108	-	177	47	NA	NA	NA	NA	NA
Ens106s00002.934	NA	Ssal	ENSSSAG00000054588	SsaCAJNNT020001769.1	236462	373059	+	177	47	NA	NA	NA	NA	NA
Ens106s00002.934	NA	Ssal	ENSSSAG00000110107	SsaCAJNNT020000722.1	154417	189800	-	177	47	NA	NA	NA	NA	NA
Ens106s00002.934	NA	Ssal	ENSSSAG00000093944	Ssa02	87598443	87650003	+	177	47	NA	NA	NA	NA	NA
Ens106s00002.934	NA	Ssal	ENSSSAG00000059675	SsaCAJNNT020002415.1	317684	336751	-	177	47	NA	NA	NA	NA	NA
Ens106s00002.934	NA	Omyk	ENSOMYG00000003401	Omy13	26174359	26190316	-	177	47	NA	NA	((Omy13,Ssa02),(Omy17,Ssa12))	AORe	NA
Ens106s00002.934	NA	Ssal	ENSSSAG00000100437	SsaCAJNNT020001981.1	29809	41433	-	177	47	NA	NA	NA	NA	NA
Ens106s00002.934	NA	Ssal	ENSSSAG00000121575	SsaCAJNNT020003322.1	1004372	1036325	-	177	47	NA	NA	NA	NA	NA
Ens106s00002.934	NA	Ssal	ENSSSAG00000100882	SsaCAJNNT020000871.1	278516	301782	+	177	47	NA	NA	NA	NA	NA
Ens106s00002.934	NA	Ssal	ENSSSAG00000089579	SsaCAJNNT020000885.1	140473	178553	+	177	47	NA	NA	NA	NA	NA
Ens106s00002.934	NA	Ssal	ENSSSAG00000102578	SsaCAJNNT020002590.1	27105	38560	+	177	47	NA	NA	NA	NA	NA
Ens106s00002.934	NA	Ssal	ENSSSAG00000091387	SsaCAJNNT020002484.1	236578	238189	-	177	47	NA	NA	NA	NA	NA
Ens106s00002.934	NA	Ssal	ENSSSAG00000121686	Ssa03	103515829	103656519	-	177	47	NA	NA	NA	NA	NA
Ens106s00002.934	NA	Ssal	ENSSSAG00000096452	SsaCAJNNT020002149.1	518664	574068	-	177	47	NA	NA	NA	NA	NA
Ens106s00002.934	NA	Ssal	ENSSSAG00000086000	Ssa03	102548813	102557661	-	177	47	NA	NA	NA	NA	NA
Ens106s00002.934	NA	Ssal	ENSSSAG00000110370	SsaCAJNNT020002183.1	633079	639337	+	177	47	NA	NA	NA	NA	NA
Ens106s00002.934	NA	Ssal	ENSSSAG00000101730	SsaCAJNNT020001288.1	93196	203430	-	177	47	NA	NA	NA	NA	NA
Ens106s00002.934	NA	Ssal	ENSSSAG00000105488	SsaCAJNNT020002484.1	46223	49827	-	177	47	NA	NA	NA	NA	NA
Ens106s00002.934	NA	Omyk	ENSOMYG00000003687	Omy13	26420845	26428475	-	177	47	NA	NA	((Omy13,Ssa02),(Omy17,Ssa12))	AORe	NA
Ens106s00002.934	NA	Ssal	ENSSSAG00000117034	Ssa02	85877574	85918519	-	177	47	NA	NA	NA	NA	NA
Ens106s00002.934	NA	Ssal	ENSSSAG00000001255	Ssa03	103672740	103733417	-	177	47	NA	NA	NA	NA	NA
Ens106s00002.934	NA	Ssal	ENSSSAG00000083695	SsaCAJNNT020001837.1	138107	198680	+	177	47	NA	NA	NA	NA	NA
Ens106s00002.934	NA	Omyk	ENSOMYG00000004965	Omy13	27908069	27913493	+	177	47	NA	NA	((Omy13,Ssa02),(Omy17,Ssa12))	AORe	NA
Ens106s00002.934	NA	Omyk	ENSOMYG00000029924	Omy13	26346806	26347812	-	177	47	NA	NA	((Omy13,Ssa02),(Omy17,Ssa12))	AORe	NA
Ens106s00002.934	NA	Ssal	ENSSSAG00000087305	SsaCAJNNT020004198.1	250251	252087	+	177	47	NA	NA	NA	NA	NA
Ens106s00002.934	NA	Ssal	ENSSSAG00000110303	SsaCAJNNT020002385.1	203666	210227	-	177	47	NA	NA	NA	NA	NA
Ens106s00002.934	NA	Ssal	ENSSSAG00000120827	SsaCAJNNT020002592.1	28751	32546	-	177	47	NA	NA	NA	NA	NA
Ens106s00002.934	NA	Omyk	ENSOMYG00000007189	Omy04	4347783	4353446	-	177	47	NA	NA	((Omy04,Ssa06),(Omy08,Ssa15))	AORe	NA
Ens106s00002.934	NA	Ssal	ENSSSAG00000089296	Ssa02	88975721	89008338	+	177	47	NA	NA	NA	NA	NA
Ens106s00002.934	NA	Ssal	ENSSSAG00000098781	Ssa03	103908419	103942400	-	177	47	NA	NA	NA	NA	NA
Ens106s00002.934	NA	Ssal	ENSSSAG00000103657	SsaCAJNNT020001769.1	29948	35400	-	177	47	NA	NA	NA	NA	NA
Ens106s00002.934	NA	Ssal	ENSSSAG00000109870	SsaCAJNNT020002049.1	320599	372714	-	177	47	NA	NA	NA	NA	NA
Ens106s00002.934	NA	Ssal	ENSSSAG00000092452	SsaCAJNNT020002466.1	25578	92926	-	177	47	NA	NA	NA	NA	NA
Ens106s00002.934	NA	Ssal	ENSSSAG00000088856	SsaCAJNNT020002131.1	210369	216139	-	177	47	NA	NA	NA	NA	NA
Ens106s00002.934	NA	Ssal	ENSSSAG00000095289	SsaCAJNNT020002032.1	67227	72659	+	177	47	NA	NA	NA	NA	NA
Ens106s00002.934	NA	Ssal	ENSSSAG00000113021	SsaCAJNNT020002028.1	23806	238613	-	177	47	NA	NA	NA	NA	NA
Ens106s00002.934	NA	Omyk	ENSOMYG00000057654	Omy04	4091946	4098210	+	177	47	NA	NA	((Omy04,Ssa06),(Omy08,Ssa15))	AORe	NA
Ens106s00002.934	NA	Ssal	ENSSSAG00000105946	SsaCAJNNT020001654.1	3341	9654	+	177	47	NA	NA	NA	NA	NA
Ens106s00002.934	NA	Ssal	ENSSSAG00000106727	SsaCAJNNT020002040.1	162979	248168	-	177	47	NA	NA	NA	NA	NA
Ens106s00002.934	NA	Ssal	ENSSSAG00000116176	SsaCAJNNT020001294.1	65384	74001	-	177	47	NA	NA	NA	NA	NA
Ens106s00002.934	NA	Omyk	ENSOMYG00000076154	Omy04	4388159	4393593	-	177	47	NA	NA	((Omy04,Ssa06),(Omy08,Ssa15))	AORe	NA
Ens106s00002.934	NA	Ssal	ENSSSAG00000109564	Ssa01	123080523	123106490	+	177	47	NA	NA	((Omy05,Ssa01),(Omy12,Ssa13))	AORe	NA
Ens106s00002.934	NA	Omyk	ENSOMYG00000004668	Omy13	28694854	28698921	+	177	47	NA	NA	((Omy13,Ssa02),(Omy17,Ssa12))	AORe	NA
Ens106s00002.934	NA	Ssal	ENSSSAG00000001189	SsaCAJNNT020001775.1	45235	46493	+	177	47	NA	NA	NA	NA	NA
Ens106s00002.934	NA	Ssal	ENSSSAG00000100165	SsaCAJNNT020001656.1	34429	176247	-	177	47	NA	NA	NA	NA	NA
Ens106s00002.934	NA	Omyk	ENSOMYG00000067287	Omy13	27322862	27360113	-	177	47	NA	NA	NA	NA	NA
Ens106s00002.934	NA	Ssal	ENSSSAG00000097281	Ssa02	88396227	88428065	+	177	47	NA	NA	NA	NA	NA
Ens106s00002.934	NA	Ssal	ENSSSAG00000082922	Ssa02	86134859	86142226	+	177	47	NA	NA	NA	NA	NA
Ens106s00002.934	NA	Ssal	ENSSSAG00000100032	Ssa02	89887619	89889365	-	177	47	NA	NA	NA	NA	NA
Ens106s00002.934	NA	Omyk	ENSOMYG00000070647	Omy13	26739334	26753832	+	177	47	NA	NA	NA	NA	NA
Ens106s00002.934	NA	Omyk	ENSOMYG00000067520	Omy13	26549671	26555843	+	177	47	NA	NA	((Omy13,Ssa02),(Omy17,Ssa12))	AORe	NA
Ens106s00002.934	NA	Ssal	ENSSSAG00000009640	Ssa02	68856567	68858171	-	177	47	NA	NA	((Omy13,Ssa02),(Omy17,Ssa12))	LORe	NA
Ens106s00002.934	NA	Ssal	ENSSSAG00000086380	Ssa12	18964203	18972280	-	177	47	NA	NA	((Omy13,Ssa02),(Omy17,Ssa12))	LORe	NA
Ens106s00002.934	NA	Omyk	ENSOMYG00000003499	Omy13	27286432	27291244	+	177	47	NA	NA	NA	NA	NA
Ens106s00002.934	NA	Omyk	ENSOMYG00000017626	Omy07	29120628	29133663	-	177	47	NA	NA	NA	NA	NA
Ens106s00002.934	NA	Ssal	ENSSSAG00000108703	Ssa02	87564371	87578274	+	177	47	NA	NA	NA	NA	NA
Ens106s00002.934	NA	Ssal	ENSSSAG00000106737	SsaCAJNNT020004198.1	444649	453625	+	177	47	NA	NA	NA	NA	NA
Ens106s00002.934	NA	Ssal	ENSSSAG00000094501	SsaCAJNNT020001807.1	565272	639597	-	177	47	NA	NA	NA	NA	NA
Ens106s00002.934	NA	Ssal	ENSSSAG00000095323	SsaCAJNNT020001763.1	222639	263386	-	177	47	NA	NA	NA	NA	NA
Ens106s00002.934	NA	Ssal	ENSSSAG00000110655	Ssa02	68744832	68756113	+	177	47	NA	NA	((Omy13,Ssa02),(Omy17,Ssa12))	LORe	NA
Ens106s00002.934	NA	Omyk	ENSOMYG00000016585	Omy06	46974338	46997071	+	177	47	NA	NA	((Omy06,Ssa24),(Omy11,Ssa15))	AORe	NA
Ens106s00002.934	NA	Ssal	ENSSSAG00000092483	Ssa02	88268457	88470060	-	177	47	NA	NA	NA	NA	NA
Ens106s00002.934	NA	Ssal	ENSSSAG00000037125	SsaCAJNNT020001652.1	150972	209751	+	177	47	NA	NA	NA	NA	NA
Ens106s00002.934	NA	Ssal	ENSSSAG00000092611	Ssa12	3609136	3723238	+	177	47	NA	NA	((Omy13,Ssa02),(Omy17,Ssa12))	LORe	NA
Ens106s00002.934	NA	Omyk	ENSOMYG00000057021	Omy07	28944912	29058771	-	177	47	NA	NA	NA	NA	NA
Ens106s00002.934	NA	Ssal	ENSSSAG00000098433	Ssa02	87479388	87485689	+	177	47	NA	NA	NA	NA	NA
Ens106s00002.934	NA	Ssal	ENSSSAG00000114060	SsaCAJNNT020000874.1	272449	300788	+	177	47	NA	NA	NA	NA	NA
Ens106s00002.934	NA	Ssal	ENSSSAG00000122284	SsaCAJNNT020001768.1	58426	133206	+	177	47	NA	NA	NA	NA	NA
Ens106s00002.934	NA	Ssal	ENSSSAG00000120261	SsaCAJNNT020002061.1	37246	39061	+	177	47	NA	NA	NA	NA	NA
Ens106s00002.934	NA	Omyk	ENSOMYG00000077244	Omy07	30009209	30013277	+	177	47	NA	NA	((Omy07,Ssa22),(Omy17,Ssa12))	AORe	NA
Ens106s00002.934	NA	Omyk	ENSOMYG00000061220	Omy07	29195195	29199061	-	177	47	NA	NA	NA	NA	NA
Ens106s00002.934	NA	Ssal	ENSSSAG00000096089	Ssa02	68670819	68684177	+	177	47	NA	NA	((Omy13,Ssa02),(Omy17,Ssa12))	LORe	NA
Ens106s00002.1499	NA	Omyk	ENSOMYG00000005497	Omy13	27464856	27471654	+	13	10	NA	NA	NA	NA	NA
Ens106s00002.1499	NA	Ssal	ENSSSAG00000084298	Ssa02	85238244	85253978	+	13	10	NA	NA	((Omy13,Ssa02),(Omy17,Ssa12))	LORe	NA
Ens106s00002.1499	NA	Ssal	ENSSSAG00000084130	Ssa02	85182724	85205965	+	13	10	NA	NA	((Omy13,Ssa02),(Omy17,Ssa12))	LORe	NA
Ens106s00002.1499	NA	Omyk	ENSOMYG00000015218	Omy17	3770496	3814761	+	13	10	NA	NA	((Omy13,Ssa02),(Omy17,Ssa12))	LORe	NA
Ens106s00002.1499	NA	Omyk	ENSOMYG00000015146	Omy13	1841845	1888262	+	13	10	NA	NA	((Omy13,Ssa02),(Omy17,Ssa12))	LORe	NA
Ens106s00002.1499	NA	Ssal	ENSSSAG00000114940	Ssa02	84594797	84629503	-	13	10	NA	NA	((Omy13,Ssa02),(Omy17,Ssa12))	LORe	NA
Ens106s00002.1499	NA	Omyk	ENSOMYG00000056756	Omy17	3508210	3526124	+	13	10	NA	NA	((Omy13,Ssa02),(Omy17,Ssa12))	LORe	NA
Ens106s00002.1499	NA	Ssal	ENSSSAG00000094018	Ssa02	85223879	85234432	+	13	10	NA	NA	((Omy13,Ssa02),(Omy17,Ssa12))	LORe	NA
Ens106s00002.1499	NA	Omyk	ENSOMYG00000047504	Omy23	31426680	31436708	-	13	10	NA	NA	((Omy01,Ssa18),(Omy23,Ssa01))	AORe	NA
Ens106s00002.1499	NA	Ssal	ENSSSAG00000094353	Ssa01	72131204	72150537	-	13	10	NA	NA	((Omy01,Ssa18),(Omy23,Ssa01))	AORe	NA
Ens106s00002.1499	NA	Ssal	ENSSSAG00000083192	Ssa02	88603355	88637606	-	13	10	NA	NA	NA	NA	NA
Ens106s00002.1499	NA	Omyk	ENSOMYG00000011652	Omy09	31774627	31779946	-	13	10	NA	NA	((Omy09,Ssa18),(Omy21,Ssa07))	AORe	NA
Ens106s00002.1499	NA	Ssal	ENSSSAG00000083774	Ssa12	19059474	19066429	+	13	10	NA	NA	((Omy13,Ssa02),(Omy17,Ssa12))	LORe	NA
Ens106s00002.1499	NA	Ssal	ENSSSAG00000114121	Ssa02	68775190	68809322	+	13	10	NA	NA	((Omy13,Ssa02),(Omy17,Ssa12))	LORe	NA
Ens106s00002.1499	NA	Ssal	ENSSSAG00000107434	Ssa02	86434728	86469024	+	13	10	NA	NA	NA	NA	NA
Ens106s00002.1499	NA	Ssal	ENSSSAG00000082490	SsaCAJNNT020001807.1	574331	763217	+	13	10	NA	NA	NA	NA	NA
Ens106s00002.1499	NA	Omyk	ENSOMYG00000017583	Omy07	28852618	28860592	-	13	10	NA	NA	NA	NA	NA
Ens106s00002.1499	NA	Ssal	ENSSSAG00000122245	Ssa02	87636583	87677037	+	13	10	NA	NA	NA	NA	NA
Ens106s00002.1499	NA	Omyk	ENSOMYG00000060916	Omy13	1497724	1516989	-	13	10	NA	NA	((Omy13,Ssa02),(Omy17,Ssa12))	LORe	NA
Ens106s00002.1499	NA	Ssal	ENSSSAG00000110930	Ssa12	5283340	5296818	-	13	10	NA	NA	((Omy13,Ssa02),(Omy17,Ssa12))	LORe	NA
Ens106s00002.1499	NA	Omyk	ENSOMYG00000039023	OmyJAAXML020000856.1	72137	80366	-	13	10	NA	NA	NA	NA	NA
Ens106s00002.1499	NA	Omyk	ENSOMYG00000054638	Omy17	5142819	5153408	-	13	10	NA	NA	NA	NA	NA
Ens106s00002.1499	NA	Ssal	ENSSSAG00000001059	Ssa02	84982976	85022425	-	13	10	NA	NA	((Omy13,Ssa02),(Omy17,Ssa12))	LORe	NA
Ens106s00002.1578	NA	Ssal	ENSSSAG00000120898	Ssa02	91205539	91503224	+	37	6	NA	NA	((Omy13,Ssa02),(Omy17,Ssa12))	LORe	NA
Ens106s00002.1578	NA	Ssal	ENSSSAG00000121444	Ssa02	86156360	86222846	+	37	6	NA	NA	NA	NA	NA
Ens106s00002.1578	NA	Ssal	ENSSSAG00000106540	Ssa03	102501027	102713587	+	37	6	NA	NA	NA	NA	NA
Ens106s00002.1578	NA	Ssal	ENSSSAG00000106002	Ssa02	91753488	91767938	+	37	6	NA	NA	((Omy13,Ssa02),(Omy17,Ssa12))	LORe	NA
Ens106s00002.1578	NA	Ssal	ENSSSAG00000105920	Ssa02	90520202	90529360	+	37	6	NA	NA	NA	NA	NA
Ens106s00002.1578	NA	Ssal	ENSSSAG00000091333	SsaCAJNNT020001807.1	60537	257369	-	37	6	NA	NA	NA	NA	NA
Ens106s00002.1578	NA	Ssal	ENSSSAG00000108099	Ssa02	88637616	88650090	+	37	6	NA	NA	NA	NA	NA
Ens106s00002.1578	NA	Ssal	ENSSSAG00000094680	SsaCAJNNT020002477.1	482234	487915	+	37	6	NA	NA	NA	NA	NA
Ens106s00002.1578	NA	Ssal	ENSSSAG00000015694	SsaCAJNNT020002415.1	373447	378336	-	37	6	NA	NA	NA	NA	NA
Ens106s00002.1578	NA	Ssal	ENSSSAG00000097487	SsaCAJNNT020002466.1	12192	19339	+	37	6	NA	NA	NA	NA	NA
Ens106s00002.1578	NA	Ssal	ENSSSAG00000100470	SsaCAJNNT020001415.1	113385	118969	-	37	6	NA	NA	NA	NA	NA
Ens106s00002.1578	NA	Ssal	ENSSSAG00000086676	Ssa02	91380641	91387347	-	37	6	NA	NA	NA	NA	NA
Ens106s00002.1578	NA	Ssal	ENSSSAG00000117518	Ssa03	103019420	103052223	+	37	6	NA	NA	NA	NA	NA
Ens106s00002.1578	NA	Ssal	ENSSSAG00000094275	SsaCAJNNT020002032.1	39027	45143	+	37	6	NA	NA	NA	NA	NA
Ens106s00002.1578	NA	Ssal	ENSSSAG00000108189	SsaCAJNNT020002466.1	32619	77053	+	37	6	NA	NA	NA	NA	NA
Ens106s00002.1578	NA	Ssal	ENSSSAG00000114532	SsaCAJNNT020002131.1	191014	200034	+	37	6	NA	NA	NA	NA	NA
Ens106s00002.1578	NA	Ssal	ENSSSAG00000120358	SsaCAJNNT020002415.1	265764	267190	-	37	6	NA	NA	NA	NA	NA
Ens106s00002.1578	NA	Ssal	ENSSSAG00000052188	SsaCAJNNT020002477.1	534728	573940	+	37	6	NA	NA	NA	NA	NA
Ens106s00002.1578	NA	Ssal	ENSSSAG00000121287	SsaCAJNNT020002019.1	1216451	1333741	-	37	6	NA	NA	NA	NA	NA
Ens106s00002.1578	NA	Ssal	ENSSSAG00000098862	Ssa02	88133695	88221152	-	37	6	NA	NA	NA	NA	NA
Ens106s00002.1578	NA	Ssal	ENSSSAG00000102992	SsaCAJNNT020002130.1	292630	407516	+	37	6	NA	NA	NA	NA	NA
Ens106s00002.1578	NA	Ssal	ENSSSAG00000102870	SsaCAJNNT020000871.1	4608	301782	+	37	6	NA	NA	NA	NA	NA
Ens106s00002.1578	NA	Ssal	ENSSSAG00000106765	SsaCAJNNT020001656.1	191847	195003	-	37	6	NA	NA	NA	NA	NA
Ens106s00002.1578	NA	Ssal	ENSSSAG00000093883	SsaCAJNNT020001296.1	253932	263452	-	37	6	NA	NA	NA	NA	NA
Ens106s00002.1578	NA	Omyk	ENSOMYG00000067977	Omy13	27439611	27454750	+	37	6	NA	NA	NA	NA	NA
Ens106s00002.1578	NA	Ssal	ENSSSAG00000088147	Ssa02	85646658	85648309	+	37	6	NA	NA	NA	NA	NA
Ens106s00002.1578	NA	Omyk	ENSOMYG00000007436	Omy04	4742747	4790299	+	37	6	NA	NA	((Omy04,Ssa06),(Omy08,Ssa15))	AORe	NA
Ens106s00002.1578	NA	Ssal	ENSSSAG00000091179	Ssa02	68609396	68619315	-	37	6	NA	NA	((Omy13,Ssa02),(Omy17,Ssa12))	LORe	NA
Ens106s00002.1578	NA	Ssal	ENSSSAG00000109980	Ssa12	19185479	19200073	+	37	6	NA	NA	((Omy13,Ssa02),(Omy17,Ssa12))	LORe	NA
Ens106s00002.1578	NA	Ssal	ENSSSAG00000118415	SsaCAJNNT020004198.1	513244	551947	-	37	6	NA	NA	NA	NA	NA
Ens106s00002.1578	NA	Omyk	ENSOMYG00000007410	Omy13	28565460	28721799	+	37	6	NA	NA	((Omy13,Ssa02),(Omy17,Ssa12))	AORe	NA
Ens106s00002.1578	NA	Ssal	ENSSSAG00000089222	SsaCAJNNT020001680.1	25467	32274	-	37	6	NA	NA	NA	NA	NA
Ens106s00002.1578	NA	Ssal	ENSSSAG00000091501	Ssa04	5688361	5693414	-	37	6	NA	NA	((Omy10,Ssa04),(Omy19,Ssa08))	LORe	NA
Ens106s00002.1578	NA	Ssal	ENSSSAG00000084667	Ssa08	23185098	23190496	+	37	6	NA	NA	((Omy10,Ssa04),(Omy19,Ssa08))	LORe	NA
Ens106s00002.1578	NA	Omyk	ENSOMYG00000007161	Omy04	4323961	4332092	+	37	6	NA	NA	((Omy04,Ssa06),(Omy08,Ssa15))	AORe	NA
Ens106s00002.1578	NA	Ssal	ENSSSAG00000112512	Ssa02	87138674	87161104	+	37	6	NA	NA	NA	NA	NA
Ens106s00002.1578	NA	Omyk	ENSOMYG00000001866	Omy07	29975213	29981994	+	37	6	NA	NA	((Omy07,Ssa22),(Omy17,Ssa12))	AORe	NA
Ens106s00002.1578	NA	Ssal	ENSSSAG00000102156	Ssa02	87232402	87251315	-	37	6	NA	NA	NA	NA	NA
Ens106s00002.1578	NA	Ssal	ENSSSAG00000089923	Ssa12	19100142	19198340	+	37	6	NA	NA	((Omy13,Ssa02),(Omy17,Ssa12))	LORe	NA
Ens106s00002.1578	NA	Omyk	ENSOMYG00000004494	Omy13	27184678	27275354	-	37	6	NA	NA	NA	NA	NA
Ens106s00002.1578	NA	Ssal	ENSSSAG00000102998	Ssa02	86254992	86264425	-	37	6	NA	NA	NA	NA	NA
Ens106s00002.1578	NA	Ssal	ENSSSAG00000094064	Ssa02	90213847	90446734	+	37	6	NA	NA	NA	NA	NA
Ens106s00002.1578	NA	Ssal	ENSSSAG00000103968	Ssa02	85632247	85717663	+	37	6	NA	NA	NA	NA	NA
Ens106s00002.1698	NA	Omyk	ENSOMYG00000004628	Omy13	28472540	28500390	+	1	2	NA	NA	((Omy13,Ssa02),(Omy17,Ssa12))	AORe	NA
Ens106s00002.1698	NA	Omyk	ENSOMYG00000039844	Omy09	31753410	31757387	+	1	2	NA	NA	((Omy09,Ssa18),(Omy21,Ssa07))	AORe	NA
Ens106s00002.1698	NA	Ssal	ENSSSAG00000084540	Ssa02	87881143	87885950	+	1	2	NA	NA	NA	NA	NA
Ens106s00002.1711	NA	Ssal	ENSSSAG00000115919	SsaCAJNNT020000885.1	5459	42030	-	3	1	NA	NA	NA	NA	NA
Ens106s00002.1711	NA	Ssal	ENSSSAG00000085125	Ssa02	85299649	85318229	+	3	1	NA	NA	((Omy13,Ssa02),(Omy17,Ssa12))	LORe	NA
Ens106s00002.1711	NA	Omyk	ENSOMYG00000072092	Omy17	3397682	3419993	-	3	1	NA	NA	((Omy13,Ssa02),(Omy17,Ssa12))	LORe	NA
Ens106s00002.1711	NA	Ssal	ENSSSAG00000120944	Ssa02	85286373	85287742	+	3	1	NA	NA	((Omy13,Ssa02),(Omy17,Ssa12))	LORe	NA
Ens106s00002.807	NA	Ssal	ENSSSAG00000049363	Ssa28	6298910	6302260	-	1	0	NA	NA	((Omy16,Ssa19),(Omy20,Ssa28))	AORe	NA
Ens106s00002.1729	A	Omyk	ENSOMYG00000033666	Omy13	2730583	2732145	-	1	1	((Omy13,Ssa02),(Omy17,Ssa12))	NA	((Omy13,Ssa02),(Omy17,Ssa12))	LORe	NA
Ens106s00002.1729	A	Ssal	ENSSSAG00000102625	Ssa02	80332846	80342678	+	1	1	((Omy13,Ssa02),(Omy17,Ssa12))	NA	((Omy13,Ssa02),(Omy17,Ssa12))	AORe	NA
Ens106s00002.1734	B	Ssal	ENSSSAG00000121432	Ssa16	88377207	88390426	+	1	1	((Omy07,Ssa17),(Omy18,Ssa16))	NA	((Omy07,Ssa17),(Omy18,Ssa16))	LORe	NA
Ens106s00002.1734	B	Omyk	ENSOMYG00000035394	Omy18	5642475	5849145	-	1	1	((Omy07,Ssa17),(Omy18,Ssa16))	NA	((Omy07,Ssa17),(Omy18,Ssa16))	LORe	NA
Ens106s00002.1749	NA	Omyk	ENSOMYG00000060017	Omy17	5241573	5258121	+	1	2	NA	NA	NA	NA	NA
Ens106s00002.1749	NA	Omyk	ENSOMYG00000071676	OmyJAAXML020000856.1	185103	194726	+	1	2	NA	NA	NA	NA	NA
Ens106s00002.1749	NA	Ssal	ENSSSAG00000118375	Ssa02	83160588	83180579	-	1	2	NA	NA	NA	NA	NA
Ens106s00002.1760	NA	Omyk	ENSOMYG00000076610	OmyJAAXML020000887.1	499074	771378	-	4	4	NA	NA	NA	NA	NA
Ens106s00002.1760	NA	Ssal	ENSSSAG00000093628	Ssa09	20125855	20149811	-	4	4	NA	NA	((Omy19,Ssa01),(Omy25,Ssa09))	AORe	NA
Ens106s00002.1760	NA	Ssal	ENSSSAG00000117739	Ssa12	5774740	5782952	-	4	4	NA	NA	NA	NA	NA
Ens106s00002.1760	NA	Ssal	ENSSSAG00000082529	Ssa02	85369141	85387895	-	4	4	NA	NA	((Omy13,Ssa02),(Omy17,Ssa12))	LORe	NA
Ens106s00002.1760	NA	Omyk	ENSOMYG00000025459	OmyJAAXML020000856.1	368853	374992	-	4	4	NA	NA	NA	NA	NA
Ens106s00002.1760	NA	Omyk	ENSOMYG00000048880	Omy17	5420831	5429382	-	4	4	NA	NA	NA	NA	NA
Ens106s00002.1760	NA	Ssal	ENSSSAG00000104015	Ssa02	92078892	92121020	+	4	4	NA	NA	((Omy13,Ssa02),(Omy17,Ssa12))	LORe	NA
Ens106s00002.1760	NA	Omyk	ENSOMYG00000015079	Omy13	1634751	1663596	+	4	4	NA	NA	((Omy13,Ssa02),(Omy17,Ssa12))	LORe	NA
Ens106s00002.1780	NA	Ssal	ENSSSAG00000091329	Ssa02	82345094	82392642	-	1	0	NA	NA	NA	NA	NA
Ens106s00002.1783	NA	Ssal	ENSSSAG00000095638	Ssa12	5941274	5948460	-	6	7	NA	NA	NA	NA	NA
Ens106s00002.1783	NA	Ssal	ENSSSAG00000094349	Ssa02	80852349	80861588	+	6	7	NA	NA	NA	NA	NA
Ens106s00002.1783	NA	Ssal	ENSSSAG00000085738	Ssa12	7681348	7689283	-	6	7	NA	NA	((Omy13,Ssa02),(Omy17,Ssa12))	AORe	NA
Ens106s00002.1783	NA	Omyk	ENSOMYG00000061884	OmyJAAXML020000344.1	46687	52261	+	6	7	NA	NA	NA	NA	NA
Ens106s00002.1783	NA	Omyk	ENSOMYG00000023269	Omy13	2194660	2503838	-	6	7	NA	NA	((Omy13,Ssa02),(Omy17,Ssa12))	LORe	NA
Ens106s00002.1783	NA	Omyk	ENSOMYG00000066400	OmyJAAXML020000334.1	368452	607861	+	6	7	NA	NA	NA	NA	NA
Ens106s00002.1783	NA	Omyk	ENSOMYG00000023184	OmyJAAXML020000334.1	431660	579545	+	6	7	NA	NA	NA	NA	NA
Ens106s00002.1783	NA	Omyk	ENSOMYG00000067460	Omy17	2242900	2319564	+	6	7	NA	NA	((Omy13,Ssa02),(Omy17,Ssa12))	LORe	NA
Ens106s00002.1783	NA	Omyk	ENSOMYG00000062545	OmyJAAXML020000856.1	359954	363925	-	6	7	NA	NA	NA	NA	NA
Ens106s00002.1783	NA	Ssal	ENSSSAG00000118407	Ssa12	7751154	7757707	-	6	7	NA	NA	((Omy13,Ssa02),(Omy17,Ssa12))	AORe	NA
Ens106s00002.1783	NA	Ssal	ENSSSAG00000097854	Ssa12	5987766	6016600	-	6	7	NA	NA	NA	NA	NA
Ens106s00002.1783	NA	Omyk	ENSOMYG00000060755	Omy17	6587215	6594368	+	6	7	NA	NA	NA	NA	NA
Ens106s00002.1783	NA	Ssal	ENSSSAG00000105783	Ssa02	82624589	82627282	+	6	7	NA	NA	NA	NA	NA
Ens106s00002.1812	B	Ssal	ENSSSAG00000103004	Ssa12	8324527	8330632	+	2	1	((Omy13,Ssa02),(Omy17,Ssa12))	NA	((Omy13,Ssa02),(Omy17,Ssa12))	AORe	NA
Ens106s00002.1812	A	Ssal	ENSSSAG00000121020	Ssa02	80019404	80024861	-	2	1	((Omy13,Ssa02),(Omy17,Ssa12))	NA	((Omy13,Ssa02),(Omy17,Ssa12))	AORe	NA
Ens106s00002.1812	A	Omyk	ENSOMYG00000014980	Omy13	2895806	2901041	+	2	1	((Omy13,Ssa02),(Omy17,Ssa12))	NA	((Omy13,Ssa02),(Omy17,Ssa12))	LORe	NA
Ens106s00002.1821	NA	Ssal	ENSSSAG00000000814	Ssa12	11702608	11715691	+	2	1	NA	NA	((Omy13,Ssa02),(Omy17,Ssa12))	cryptic	NA
Ens106s00002.1821	NA	Omyk	ENSOMYG00000003427	OmyJAAXML020000669.1	442522	446817	-	2	1	NA	NA	NA	NA	NA
Ens106s00002.1821	NA	Ssal	ENSSSAG00000117753	Ssa02	76643208	76660688	+	2	1	NA	NA	((Omy13,Ssa02),(Omy17,Ssa12))	cryptic	NA
Ens106s00002.1830	NA	Omyk	ENSOMYG00000054623	Omy13	2943556	2948111	-	0	1	NA	NA	((Omy13,Ssa02),(Omy17,Ssa12))	LORe	NA
Ens106s00003.168	A	Omyk	ENSOMYG00000075534	Omy07	81261355	81299097	+	2	2	((Omy07,Ssa22),(Omy17,Ssa12))	AORe	((Omy07,Ssa22),(Omy17,Ssa12))	AORe	NA
Ens106s00003.168	A	Ssal	ENSSSAG00000043031	Ssa22	53627671	53725038	+	2	2	((Omy07,Ssa22),(Omy17,Ssa12))	AORe	((Omy07,Ssa22),(Omy17,Ssa12))	AORe	NA
Ens106s00003.168	B	Omyk	ENSOMYG00000075255	Omy17	88089184	88140420	+	2	2	((Omy07,Ssa22),(Omy17,Ssa12))	AORe	((Omy07,Ssa22),(Omy17,Ssa12))	AORe	NA
Ens106s00003.168	B	Ssal	ENSSSAG00000067468	Ssa12	93426320	93526935	+	2	2	((Omy07,Ssa22),(Omy17,Ssa12))	AORe	((Omy07,Ssa22),(Omy17,Ssa12))	AORe	NA
Ens106s00003.183	B	Omyk	ENSOMYG00000038289	Omy16	60797248	60803026	+	1	1	((Omy09,Ssa15),(Omy16,Ssa13))	NA	((Omy09,Ssa15),(Omy16,Ssa13))	AORe	FALSE
Ens106s00003.183	B	Ssal	ENSSSAG00000068533	Ssa13	20956651	20963239	-	1	1	((Omy09,Ssa15),(Omy16,Ssa13))	NA	((Omy09,Ssa15),(Omy16,Ssa13))	AORe	FALSE
Ens106s00003.193	B	Ssal	ENSSSAG00000081509	Ssa21	15952119	15979131	+	2	2	((Omy03,Ssa25),(Omy22,Ssa21))	AORe	((Omy03,Ssa25),(Omy22,Ssa21))	AORe	NA
Ens106s00003.193	B	Omyk	ENSOMYG00000027920	Omy22	15622189	15645914	-	2	2	((Omy03,Ssa25),(Omy22,Ssa21))	AORe	((Omy03,Ssa25),(Omy22,Ssa21))	AORe	NA
Ens106s00003.193	A	Omyk	ENSOMYG00000047750	Omy03	48826745	48856469	+	2	2	((Omy03,Ssa25),(Omy22,Ssa21))	AORe	((Omy03,Ssa25),(Omy22,Ssa21))	AORe	NA
Ens106s00003.193	A	Ssal	ENSSSAG00000081524	Ssa25	14055529	14078111	+	2	2	((Omy03,Ssa25),(Omy22,Ssa21))	AORe	((Omy03,Ssa25),(Omy22,Ssa21))	AORe	NA
Ens106s00003.213	A	Omyk	ENSOMYG00000021791	Omy01	18771621	18824692	-	2	2	((Omy01,Ssa16),(Omy05,Ssa10))	AORe	((Omy01,Ssa16),(Omy05,Ssa10))	AORe	NA
Ens106s00003.213	A	Ssal	ENSSSAG00000105401	Ssa16	41183395	41233929	+	2	2	((Omy01,Ssa16),(Omy05,Ssa10))	AORe	((Omy01,Ssa16),(Omy05,Ssa10))	AORe	NA
Ens106s00003.213	B	Omyk	ENSOMYG00000005601	Omy05	59666928	59708594	-	2	2	((Omy01,Ssa16),(Omy05,Ssa10))	AORe	((Omy01,Ssa16),(Omy05,Ssa10))	AORe	NA
Ens106s00003.213	B	Ssal	ENSSSAG00000002400	Ssa10	18072350	18303142	-	2	2	((Omy01,Ssa16),(Omy05,Ssa10))	AORe	((Omy01,Ssa16),(Omy05,Ssa10))	AORe	NA
Ens106s00003.236	A	Ssal	ENSSSAG00000055868	Ssa27	1942839	1965190	+	2	2	((Omy18,Ssa27),(Omy32,Ssa14))	AORe	((Omy18,Ssa27),(Omy32,Ssa14))	AORe	NA
Ens106s00003.236	A	Omyk	ENSOMYG00000042862	Omy18	31925088	31950797	+	2	2	((Omy18,Ssa27),(Omy32,Ssa14))	AORe	((Omy18,Ssa27),(Omy32,Ssa14))	AORe	NA
Ens106s00003.236	B	Ssal	ENSSSAG00000006824	Ssa14	58154237	58198313	+	2	2	((Omy18,Ssa27),(Omy32,Ssa14))	AORe	((Omy18,Ssa27),(Omy32,Ssa14))	AORe	NA
Ens106s00003.236	B	Omyk	ENSOMYG00000071708	Omy32	39120287	39135727	-	2	2	((Omy18,Ssa27),(Omy32,Ssa14))	AORe	((Omy18,Ssa27),(Omy32,Ssa14))	AORe	NA
Ens106s00003.252	B	Ssal	ENSSSAG00000114447	Ssa02	19431896	19523988	-	2	2	((Omy02,Ssa05),(Omy03,Ssa02))	(((Omy02,Omy03),Ssa02),Ssa05)	((Omy02,Ssa05),(Omy03,Ssa02))	LORe	NA
Ens106s00003.252	B	Omyk	ENSOMYG00000052016	Omy03	9121475	9137978	-	2	2	((Omy02,Ssa05),(Omy03,Ssa02))	(((Omy02,Omy03),Ssa02),Ssa05)	((Omy02,Ssa05),(Omy03,Ssa02))	LORe	NA
Ens106s00003.252	A	Omyk	ENSOMYG00000025358	Omy02	17685913	17722079	-	2	2	((Omy02,Ssa05),(Omy03,Ssa02))	(((Omy02,Omy03),Ssa02),Ssa05)	((Omy02,Ssa05),(Omy03,Ssa02))	LORe	NA
Ens106s00003.252	A	Ssal	ENSSSAG00000059839	Ssa05	74734224	74771358	+	2	2	((Omy02,Ssa05),(Omy03,Ssa02))	(((Omy02,Omy03),Ssa02),Ssa05)	((Omy02,Ssa05),(Omy03,Ssa02))	LORe	NA
Ens106s00003.270	B	Omyk	ENSOMYG00000033114	Omy26	44930607	44951118	-	1	2	((Omy06,Ssa26),(Omy26,Ssa11))	NA	((Omy06,Ssa26),(Omy26,Ssa11))	LORe	NA
Ens106s00003.270	A	Omyk	ENSOMYG00000050517	Omy06	84707950	84722055	-	1	2	((Omy06,Ssa26),(Omy26,Ssa11))	NA	((Omy06,Ssa26),(Omy26,Ssa11))	LORe	NA
Ens106s00003.270	B	Ssal	ENSSSAG00000116956	Ssa11	37319254	37345932	-	1	2	((Omy06,Ssa26),(Omy26,Ssa11))	NA	((Omy06,Ssa26),(Omy26,Ssa11))	LORe	NA
Ens106s00003.295	A	Ssal	ENSSSAG00000073752	Ssa14	13395677	13417291	-	1	1	((Omy08,Ssa14),(Omy28,Ssa03))	NA	((Omy08,Ssa14),(Omy28,Ssa03))	AORe	FALSE
Ens106s00003.295	A	Omyk	ENSOMYG00000002163	Omy08	54446445	54465711	-	1	1	((Omy08,Ssa14),(Omy28,Ssa03))	NA	((Omy08,Ssa14),(Omy28,Ssa03))	AORe	FALSE
Ens106s00003.303	B	Ssal	ENSSSAG00000007285	Ssa10	19272581	19312826	-	1	1	((Omy01,Ssa16),(Omy05,Ssa10))	NA	((Omy01,Ssa16),(Omy05,Ssa10))	AORe	FALSE
Ens106s00003.303	B	Omyk	ENSOMYG00000009657	Omy05	60706479	60735397	-	1	1	((Omy01,Ssa16),(Omy05,Ssa10))	NA	((Omy01,Ssa16),(Omy05,Ssa10))	AORe	FALSE
Ens106s00003.309	NA	Omyk	ENSOMYG00000002074	Omy01	19907959	19934538	-	0	1	NA	NA	((Omy01,Ssa16),(Omy05,Ssa10))	AORe	NA
Ens106s00004.150	NA	Ssal	ENSSSAG00000065630	Ssa19	5184310	5205908	-	2	2	NA	NA	NA	NA	NA
Ens106s00004.150	NA	Omyk	ENSOMYG00000006346	Omy20	2478320	2531098	-	2	2	NA	NA	NA	NA	NA
Ens106s00004.150	NA	Ssal	ENSSSAG00000069965	Ssa19	62931467	62963728	-	2	2	NA	NA	NA	NA	NA
Ens106s00004.150	NA	Omyk	ENSOMYG00000041292	Omy16	26319978	26343081	-	2	2	NA	NA	NA	NA	NA
Ens106s00004.173	B	Omyk	ENSOMYG00000021821	Omy21	14488474	14493002	+	2	2	((Omy15,Ssa17),(Omy21,Ssa07))	LORe	((Omy15,Ssa17),(Omy21,Ssa07))	cryptic	NA
Ens106s00004.173	A	Omyk	ENSOMYG00000008822	Omy15	69223072	69227659	-	2	2	((Omy15,Ssa17),(Omy21,Ssa07))	LORe	((Omy15,Ssa17),(Omy21,Ssa07))	cryptic	NA
Ens106s00004.173	A	Ssal	ENSSSAG00000095722	Ssa17	72531757	72536420	-	2	2	((Omy15,Ssa17),(Omy21,Ssa07))	LORe	((Omy15,Ssa17),(Omy21,Ssa07))	cryptic	NA
Ens106s00004.173	B	Ssal	ENSSSAG00000109546	Ssa07	55211829	55216430	-	2	2	((Omy15,Ssa17),(Omy21,Ssa07))	LORe	((Omy15,Ssa17),(Omy21,Ssa07))	cryptic	NA
Ens106s00004.191	B	Omyk	ENSOMYG00000003914	Omy03	26752836	26763401	+	2	2	((Omy02,Ssa05),(Omy03,Ssa02))	AORe	((Omy02,Ssa05),(Omy03,Ssa02))	AORe	NA
Ens106s00004.191	B	Ssal	ENSSSAG00000067990	Ssa02	37985268	38022699	+	2	2	((Omy02,Ssa05),(Omy03,Ssa02))	AORe	((Omy02,Ssa05),(Omy03,Ssa02))	AORe	NA
Ens106s00004.191	A	Ssal	ENSSSAG00000053808	Ssa05	56607307	56629178	-	2	2	((Omy02,Ssa05),(Omy03,Ssa02))	AORe	((Omy02,Ssa05),(Omy03,Ssa02))	AORe	NA
Ens106s00004.191	A	Omyk	ENSOMYG00000029658	Omy02	35294098	35309021	+	2	2	((Omy02,Ssa05),(Omy03,Ssa02))	AORe	((Omy02,Ssa05),(Omy03,Ssa02))	AORe	NA
Ens106s00004.213	A	Ssal	ENSSSAG00000005423	Ssa01	35099438	35235362	+	2	2	((Omy19,Ssa01),(Omy25,Ssa09))	AORe	((Omy19,Ssa01),(Omy25,Ssa09))	AORe	NA
Ens106s00004.213	A	Omyk	ENSOMYG00000040336	Omy19	35689759	35703615	-	2	2	((Omy19,Ssa01),(Omy25,Ssa09))	AORe	((Omy19,Ssa01),(Omy25,Ssa09))	AORe	NA
Ens106s00004.213	B	Ssal	ENSSSAG00000002256	Ssa09	29661059	29666197	+	2	2	((Omy19,Ssa01),(Omy25,Ssa09))	AORe	((Omy19,Ssa01),(Omy25,Ssa09))	AORe	NA
Ens106s00004.213	B	Omyk	ENSOMYG00000045034	Omy25	27665089	27670028	+	2	2	((Omy19,Ssa01),(Omy25,Ssa09))	AORe	((Omy19,Ssa01),(Omy25,Ssa09))	AORe	NA
Ens106s00004.226	B	Ssal	ENSSSAG00000067583	Ssa15	47884585	47895581	+	1	1	((Omy04,Ssa06),(Omy08,Ssa15))	NA	((Omy04,Ssa06),(Omy08,Ssa15))	AORe	FALSE
Ens106s00004.226	B	Omyk	ENSOMYG00000026147	Omy08	30168121	30172066	+	1	1	((Omy04,Ssa06),(Omy08,Ssa15))	NA	((Omy04,Ssa06),(Omy08,Ssa15))	AORe	FALSE
Ens106s00004.232	A	Ssal	ENSSSAG00000043788	Ssa06	83347059	83356103	-	1	1	((Omy04,Ssa06),(Omy08,Ssa15))	NA	((Omy04,Ssa06),(Omy08,Ssa15))	AORe	FALSE
Ens106s00004.232	A	Omyk	ENSOMYG00000010762	Omy04	35885903	35895616	-	1	1	((Omy04,Ssa06),(Omy08,Ssa15))	NA	((Omy04,Ssa06),(Omy08,Ssa15))	AORe	FALSE
Ens106s00004.246	A	Omyk	ENSOMYG00000016511	Omy06	57649599	57776997	+	2	2	((Omy06,Ssa26),(Omy26,Ssa11))	AORe	((Omy06,Ssa26),(Omy26,Ssa11))	AORe	NA
Ens106s00004.246	A	Ssal	ENSSSAG00000042508	Ssa26	10487527	10498045	+	2	2	((Omy06,Ssa26),(Omy26,Ssa11))	AORe	((Omy06,Ssa26),(Omy26,Ssa11))	AORe	NA
Ens106s00004.246	B	Ssal	ENSSSAG00000079733	Ssa11	9936579	9978893	+	2	2	((Omy06,Ssa26),(Omy26,Ssa11))	AORe	((Omy06,Ssa26),(Omy26,Ssa11))	AORe	NA
Ens106s00004.246	B	Omyk	ENSOMYG00000042496	Omy26	17861978	17870097	+	2	2	((Omy06,Ssa26),(Omy26,Ssa11))	AORe	((Omy06,Ssa26),(Omy26,Ssa11))	AORe	NA
Ens106s00004.266	A	Ssal	ENSSSAG00000006066	Ssa06	81664395	81669586	-	2	2	((Omy04,Ssa06),(Omy08,Ssa15))	AORe	((Omy04,Ssa06),(Omy08,Ssa15))	AORe	NA
Ens106s00004.266	A	Omyk	ENSOMYG00000008540	Omy04	34459670	34464280	-	2	2	((Omy04,Ssa06),(Omy08,Ssa15))	AORe	((Omy04,Ssa06),(Omy08,Ssa15))	AORe	NA
Ens106s00004.266	B	Ssal	ENSSSAG00000074690	Ssa15	49077882	49089764	+	2	2	((Omy04,Ssa06),(Omy08,Ssa15))	AORe	((Omy04,Ssa06),(Omy08,Ssa15))	AORe	NA
Ens106s00004.266	B	Omyk	ENSOMYG00000030586	Omy08	31367848	31376233	+	2	2	((Omy04,Ssa06),(Omy08,Ssa15))	AORe	((Omy04,Ssa06),(Omy08,Ssa15))	AORe	NA
Ens106s00004.279	A	Ssal	ENSSSAG00000051825	Ssa01	32588253	32600898	-	1	1	((Omy19,Ssa01),(Omy25,Ssa09))	NA	((Omy19,Ssa01),(Omy25,Ssa09))	AORe	FALSE
Ens106s00004.279	A	Omyk	ENSOMYG00000043936	Omy19	38120929	38130468	+	1	1	((Omy19,Ssa01),(Omy25,Ssa09))	NA	((Omy19,Ssa01),(Omy25,Ssa09))	AORe	FALSE
Ens106s00005.247	NA	Omyk	ENSOMYG00000056006	Omy14	24861999	24864959	-	14	10	NA	NA	NA	NA	NA
Ens106s00005.247	NA	Ssal	ENSSSAG00000002449	Ssa05	20386813	20390322	+	14	10	NA	NA	NA	NA	NA
Ens106s00005.247	NA	Ssal	ENSSSAG00000010613	Ssa05	20675280	20679200	-	14	10	NA	NA	NA	NA	NA
Ens106s00005.247	NA	Omyk	ENSOMYG00000036606	Omy14	24602442	24603733	+	14	10	NA	NA	NA	NA	NA
Ens106s00005.247	NA	Ssal	ENSSSAG00000002508	Ssa05	20488936	20491220	-	14	10	NA	NA	NA	NA	NA
Ens106s00005.247	NA	Omyk	ENSOMYG00000036676	Omy14	24843478	24845498	+	14	10	NA	NA	NA	NA	NA
Ens106s00005.247	NA	Omyk	ENSOMYG00000036661	Omy14	24731177	24760163	+	14	10	NA	NA	NA	NA	NA
Ens106s00005.247	NA	Ssal	ENSSSAG00000092852	Ssa05	20530967	20535281	-	14	10	NA	NA	NA	NA	NA
Ens106s00005.247	NA	Ssal	ENSSSAG00000092040	Ssa05	20630995	20644152	-	14	10	NA	NA	NA	NA	NA
Ens106s00005.247	NA	Omyk	ENSOMYG00000036669	Omy14	24800727	24804729	+	14	10	NA	NA	NA	NA	NA
Ens106s00005.247	NA	Omyk	ENSOMYG00000036637	Omy14	24777999	24782228	+	14	10	NA	NA	NA	NA	NA
Ens106s00005.247	NA	Ssal	ENSSSAG00000089970	Ssa05	20312005	20370619	+	14	10	NA	NA	NA	NA	NA
Ens106s00005.247	NA	Ssal	ENSSSAG00000002600	Ssa05	20650688	20663717	+	14	10	NA	NA	NA	NA	NA
Ens106s00005.247	NA	Ssal	ENSSSAG00000083945	Ssa05	20690121	20692889	+	14	10	NA	NA	NA	NA	NA
Ens106s00005.247	NA	Omyk	ENSOMYG00000036645	Omy14	24711621	24751063	-	14	10	NA	NA	NA	NA	NA
Ens106s00005.247	NA	Omyk	ENSOMYG00000036630	Omy14	24704759	24709142	-	14	10	NA	NA	NA	NA	NA
Ens106s00005.247	NA	Ssal	ENSSSAG00000002523	Ssa05	20510507	20515726	+	14	10	NA	NA	NA	NA	NA
Ens106s00005.247	NA	Ssal	ENSSSAG00000002635	Ssa05	20701275	20703916	+	14	10	NA	NA	NA	NA	NA
Ens106s00005.247	NA	Ssal	ENSSSAG00000002464	Ssa05	20409007	20412289	+	14	10	NA	NA	NA	NA	NA
Ens106s00005.247	NA	Omyk	ENSOMYG00000036687	Omy14	24904731	24907540	-	14	10	NA	NA	NA	NA	NA
Ens106s00005.247	NA	Ssal	ENSSSAG00000002617	Ssa05	20681300	20686358	-	14	10	NA	NA	NA	NA	NA
Ens106s00005.247	NA	Ssal	ENSSSAG00000002578	Ssa05	20539566	20543159	-	14	10	NA	NA	NA	NA	NA
Ens106s00005.247	NA	Omyk	ENSOMYG00000036666	Omy14	24750067	24774209	+	14	10	NA	NA	NA	NA	NA
Ens106s00005.247	NA	Ssal	ENSSSAG00000002590	Ssa05	20552324	20561768	-	14	10	NA	NA	NA	NA	NA
Ens106s00005.345	NA	Ssal	ENSSSAG00000054173	Ssa18	64607534	64609853	-	3	0	NA	NA	((Omy09,Ssa18),(Omy21,Ssa07))	AORe	NA
Ens106s00005.345	NA	Ssal	ENSSSAG00000054222	Ssa18	64673979	64681791	-	3	0	NA	NA	((Omy09,Ssa18),(Omy21,Ssa07))	AORe	NA
Ens106s00005.345	NA	Ssal	ENSSSAG00000085081	Ssa07	22031405	22038636	+	3	0	NA	NA	((Omy09,Ssa18),(Omy21,Ssa07))	AORe	NA
Ens106s00005.355	NA	Ssal	ENSSSAG00000089136	Ssa18	65048191	65063945	+	1	0	NA	NA	((Omy09,Ssa18),(Omy21,Ssa07))	AORe	NA
Ens106s00005.366	B	Omyk	ENSOMYG00000015194	Omy21	45123365	45126015	-	1	1	((Omy09,Ssa18),(Omy21,Ssa07))	NA	((Omy09,Ssa18),(Omy21,Ssa07))	AORe	FALSE
Ens106s00005.366	B	Ssal	ENSSSAG00000081561	Ssa07	21693115	21762065	+	1	1	((Omy09,Ssa18),(Omy21,Ssa07))	NA	((Omy09,Ssa18),(Omy21,Ssa07))	AORe	FALSE
Ens106s00005.374	B	Ssal	ENSSSAG00000025481	Ssa07	21690170	21692035	+	1	1	((Omy09,Ssa18),(Omy21,Ssa07))	NA	((Omy09,Ssa18),(Omy21,Ssa07))	AORe	FALSE
Ens106s00005.374	B	Omyk	ENSOMYG00000070461	Omy21	45126612	45128119	-	1	1	((Omy09,Ssa18),(Omy21,Ssa07))	NA	((Omy09,Ssa18),(Omy21,Ssa07))	AORe	FALSE
Ens106s00005.375	NA	Ssal	ENSSSAG00000054687	Ssa18	65142586	65144516	+	15	13	NA	NA	((Omy09,Ssa18),(Omy21,Ssa07))	AORe	NA
Ens106s00005.375	NA	Ssal	ENSSSAG00000054639	Ssa18	65177573	65179568	+	15	13	NA	NA	((Omy09,Ssa18),(Omy21,Ssa07))	AORe	NA
Ens106s00005.375	NA	Ssal	ENSSSAG00000105625	Ssa18	65025599	65028215	+	15	13	NA	NA	((Omy09,Ssa18),(Omy21,Ssa07))	AORe	NA
Ens106s00005.375	NA	Omyk	ENSOMYG00000071959	Omy09	19259317	19292871	-	15	13	NA	NA	((Omy09,Ssa18),(Omy21,Ssa07))	AORe	NA
Ens106s00005.375	NA	Omyk	ENSOMYG00000001590	Omy09	19148191	19174378	-	15	13	NA	NA	((Omy09,Ssa18),(Omy21,Ssa07))	AORe	NA
Ens106s00005.375	NA	Ssal	ENSSSAG00000054373	Ssa18	64780516	64782879	-	15	13	NA	NA	((Omy09,Ssa18),(Omy21,Ssa07))	AORe	NA
Ens106s00005.375	NA	Ssal	ENSSSAG00000054599	Ssa18	64932324	64936862	-	15	13	NA	NA	((Omy09,Ssa18),(Omy21,Ssa07))	AORe	NA
Ens106s00005.375	NA	Omyk	ENSOMYG00000002244	Omy09	19340727	19343834	+	15	13	NA	NA	((Omy09,Ssa18),(Omy21,Ssa07))	AORe	NA
Ens106s00005.375	NA	Omyk	ENSOMYG00000002365	Omy09	19440401	19442826	+	15	13	NA	NA	((Omy09,Ssa18),(Omy21,Ssa07))	AORe	NA
Ens106s00005.375	NA	Ssal	ENSSSAG00000054365	Ssa18	64770580	64775099	+	15	13	NA	NA	((Omy09,Ssa18),(Omy21,Ssa07))	AORe	NA
Ens106s00005.375	NA	Omyk	ENSOMYG00000063413	Omy21	45053503	45062142	+	15	13	NA	NA	((Omy09,Ssa18),(Omy21,Ssa07))	AORe	NA
Ens106s00005.375	NA	Ssal	ENSSSAG00000054518	Ssa18	64862859	64865273	-	15	13	NA	NA	((Omy09,Ssa18),(Omy21,Ssa07))	AORe	NA
Ens106s00005.375	NA	Ssal	ENSSSAG00000088055	Ssa18	64886744	64889170	-	15	13	NA	NA	((Omy09,Ssa18),(Omy21,Ssa07))	AORe	NA
Ens106s00005.375	NA	Omyk	ENSOMYG00000002253	Omy09	19369105	19370999	+	15	13	NA	NA	((Omy09,Ssa18),(Omy21,Ssa07))	AORe	NA
Ens106s00005.375	NA	Omyk	ENSOMYG00000015486	Omy21	45242065	45245596	-	15	13	NA	NA	((Omy09,Ssa18),(Omy21,Ssa07))	AORe	NA
Ens106s00005.375	NA	Omyk	ENSOMYG00000052918	Omy21	45230579	45232195	-	15	13	NA	NA	((Omy09,Ssa18),(Omy21,Ssa07))	AORe	NA
Ens106s00005.375	NA	Ssal	ENSSSAG00000081556	Ssa07	21686416	21688620	+	15	13	NA	NA	((Omy09,Ssa18),(Omy21,Ssa07))	AORe	NA
Ens106s00005.375	NA	Ssal	ENSSSAG00000081569	Ssa07	21895748	21898328	-	15	13	NA	NA	((Omy09,Ssa18),(Omy21,Ssa07))	AORe	NA
Ens106s00005.375	NA	Ssal	ENSSSAG00000081574	Ssa07	21918093	21980681	+	15	13	NA	NA	((Omy09,Ssa18),(Omy21,Ssa07))	AORe	NA
Ens106s00005.375	NA	Ssal	ENSSSAG00000081551	Ssa07	21873822	21876278	-	15	13	NA	NA	((Omy09,Ssa18),(Omy21,Ssa07))	AORe	NA
Ens106s00005.375	NA	Omyk	ENSOMYG00000015198	Omy21	45131669	45133190	-	15	13	NA	NA	((Omy09,Ssa18),(Omy21,Ssa07))	AORe	NA
Ens106s00005.375	NA	Omyk	ENSOMYG00000015125	Omy21	45072651	45074331	+	15	13	NA	NA	((Omy09,Ssa18),(Omy21,Ssa07))	AORe	NA
Ens106s00005.375	NA	Omyk	ENSOMYG00000015437	Omy21	45184115	45199120	-	15	13	NA	NA	((Omy09,Ssa18),(Omy21,Ssa07))	AORe	NA
Ens106s00005.375	NA	Ssal	ENSSSAG00000081547	Ssa07	21650583	21663116	+	15	13	NA	NA	((Omy09,Ssa18),(Omy21,Ssa07))	AORe	NA
Ens106s00005.375	NA	Ssal	ENSSSAG00000120710	Ssa07	21708736	21710922	+	15	13	NA	NA	((Omy09,Ssa18),(Omy21,Ssa07))	AORe	NA
Ens106s00005.375	NA	Omyk	ENSOMYG00000015397	Omy21	45178144	45180483	-	15	13	NA	NA	((Omy09,Ssa18),(Omy21,Ssa07))	AORe	NA
Ens106s00005.375	NA	Ssal	ENSSSAG00000054627	Ssa18	64981937	64984310	+	15	13	NA	NA	((Omy09,Ssa18),(Omy21,Ssa07))	AORe	NA
Ens106s00005.375	NA	Omyk	ENSOMYG00000002208	Omy09	19309645	19311453	-	15	13	NA	NA	((Omy09,Ssa18),(Omy21,Ssa07))	AORe	NA
Ens106s00006.172	A	Omyk	ENSOMYG00000022457	Omy10	16091886	16115871	-	2	2	((Omy10,Ssa04),(Omy12,Ssa13))	AORe	((Omy10,Ssa04),(Omy12,Ssa13))	AORe	NA
Ens106s00006.172	A	Ssal	ENSSSAG00000067347	Ssa04	72521928	72552177	+	2	2	((Omy10,Ssa04),(Omy12,Ssa13))	AORe	((Omy10,Ssa04),(Omy12,Ssa13))	AORe	NA
Ens106s00006.172	B	Ssal	ENSSSAG00000079188	Ssa13	61264744	61306829	-	2	2	((Omy10,Ssa04),(Omy12,Ssa13))	AORe	((Omy10,Ssa04),(Omy12,Ssa13))	AORe	NA
Ens106s00006.172	B	Omyk	ENSOMYG00000018969	Omy12	49168437	49205186	+	2	2	((Omy10,Ssa04),(Omy12,Ssa13))	AORe	((Omy10,Ssa04),(Omy12,Ssa13))	AORe	NA
Ens106s00006.193	B	Omyk	ENSOMYG00000003002	Omy08	9013673	9124610	-	2	2	((Omy04,Ssa06),(Omy08,Ssa15))	AORe	((Omy04,Ssa06),(Omy08,Ssa15))	AORe	NA
Ens106s00006.193	B	Ssal	ENSSSAG00000040963	Ssa15	25022524	25166599	-	2	2	((Omy04,Ssa06),(Omy08,Ssa15))	AORe	((Omy04,Ssa06),(Omy08,Ssa15))	AORe	NA
Ens106s00006.193	A	Ssal	ENSSSAG00000022058	Ssa06	54242385	54387892	+	2	2	((Omy04,Ssa06),(Omy08,Ssa15))	AORe	((Omy04,Ssa06),(Omy08,Ssa15))	AORe	NA
Ens106s00006.193	A	Omyk	ENSOMYG00000011129	Omy04	5203778	5336419	-	2	2	((Omy04,Ssa06),(Omy08,Ssa15))	AORe	((Omy04,Ssa06),(Omy08,Ssa15))	AORe	NA
Ens106s00006.217	B	Ssal	ENSSSAG00000044396	Ssa15	51754083	51864662	-	2	2	((Omy04,Ssa06),(Omy08,Ssa15))	AORe	((Omy04,Ssa06),(Omy08,Ssa15))	AORe	NA
Ens106s00006.217	B	Omyk	ENSOMYG00000033912	Omy08	33722826	33822214	-	2	2	((Omy04,Ssa06),(Omy08,Ssa15))	AORe	((Omy04,Ssa06),(Omy08,Ssa15))	AORe	NA
Ens106s00006.217	A	Ssal	ENSSSAG00000048020	Ssa06	77819845	77932092	+	2	2	((Omy04,Ssa06),(Omy08,Ssa15))	AORe	((Omy04,Ssa06),(Omy08,Ssa15))	AORe	NA
Ens106s00006.217	A	Omyk	ENSOMYG00000008663	Omy04	31633311	31746462	+	2	2	((Omy04,Ssa06),(Omy08,Ssa15))	AORe	((Omy04,Ssa06),(Omy08,Ssa15))	AORe	NA
Ens106s00006.238	B	Ssal	ENSSSAG00000080957	Ssa12	59297320	59347529	+	1	1	((Omy07,Ssa22),(Omy17,Ssa12))	NA	((Omy07,Ssa22),(Omy17,Ssa12))	AORe	FALSE
Ens106s00006.238	B	Omyk	ENSOMYG00000006280	Omy17	55666160	55715526	+	1	1	((Omy07,Ssa22),(Omy17,Ssa12))	NA	((Omy07,Ssa22),(Omy17,Ssa12))	AORe	FALSE
Ens106s00006.250	B	Ssal	ENSSSAG00000080046	Ssa20	20220966	20262561	-	2	2	((Omy06,Ssa24),(Omy11,Ssa20))	AORe	((Omy06,Ssa24),(Omy11,Ssa20))	AORe	NA
Ens106s00006.250	B	Omyk	ENSOMYG00000045085	Omy11	51876087	51912781	-	2	2	((Omy06,Ssa24),(Omy11,Ssa20))	AORe	((Omy06,Ssa24),(Omy11,Ssa20))	AORe	NA
Ens106s00006.250	A	Ssal	ENSSSAG00000054431	Ssa24	24646958	24706402	+	2	2	((Omy06,Ssa24),(Omy11,Ssa20))	AORe	((Omy06,Ssa24),(Omy11,Ssa20))	AORe	NA
Ens106s00006.250	A	Omyk	ENSOMYG00000016066	Omy06	23227149	23298071	-	2	2	((Omy06,Ssa24),(Omy11,Ssa20))	AORe	((Omy06,Ssa24),(Omy11,Ssa20))	AORe	NA
Ens106s00006.272	B	Omyk	ENSOMYG00000036817	Omy28	12135534	12203962	+	2	2	((Omy08,Ssa14),(Omy28,Ssa03))	AORe	((Omy08,Ssa14),(Omy28,Ssa03))	AORe	NA
Ens106s00006.272	B	Ssal	ENSSSAG00000000928	Ssa03	34562132	34633667	-	2	2	((Omy08,Ssa14),(Omy28,Ssa03))	AORe	((Omy08,Ssa14),(Omy28,Ssa03))	AORe	NA
Ens106s00006.272	A	Ssal	ENSSSAG00000064198	Ssa14	32462916	32540909	-	2	2	((Omy08,Ssa14),(Omy28,Ssa03))	AORe	((Omy08,Ssa14),(Omy28,Ssa03))	AORe	NA
Ens106s00006.272	A	Omyk	ENSOMYG00000037361	Omy08	72564795	72632882	-	2	2	((Omy08,Ssa14),(Omy28,Ssa03))	AORe	((Omy08,Ssa14),(Omy28,Ssa03))	AORe	NA
Ens106s00006.292	A	Omyk	ENSOMYG00000009481	Omy19	38461540	38502555	+	2	2	((Omy19,Ssa01),(Omy25,Ssa09))	AORe	((Omy19,Ssa01),(Omy25,Ssa09))	AORe	NA
Ens106s00006.292	A	Ssal	ENSSSAG00000040987	Ssa01	32194418	32240166	-	2	2	((Omy19,Ssa01),(Omy25,Ssa09))	AORe	((Omy19,Ssa01),(Omy25,Ssa09))	AORe	NA
Ens106s00006.292	B	Ssal	ENSSSAG00000007093	Ssa09	26287648	26345577	-	2	2	((Omy19,Ssa01),(Omy25,Ssa09))	AORe	((Omy19,Ssa01),(Omy25,Ssa09))	AORe	NA
Ens106s00006.292	B	Omyk	ENSOMYG00000037255	Omy25	24508321	24559284	-	2	2	((Omy19,Ssa01),(Omy25,Ssa09))	AORe	((Omy19,Ssa01),(Omy25,Ssa09))	AORe	NA
Ens106s00006.309	B	Ssal	ENSSSAG00000064027	Ssa15	28127620	28215595	+	2	2	((Omy04,Ssa06),(Omy08,Ssa15))	AORe	((Omy04,Ssa06),(Omy08,Ssa15))	AORe	NA
Ens106s00006.309	B	Omyk	ENSOMYG00000008329	Omy08	11918852	11983216	+	2	2	((Omy04,Ssa06),(Omy08,Ssa15))	AORe	((Omy04,Ssa06),(Omy08,Ssa15))	AORe	NA
Ens106s00006.309	A	Ssal	ENSSSAG00000008433	Ssa06	51664624	51750442	-	2	2	((Omy04,Ssa06),(Omy08,Ssa15))	AORe	((Omy04,Ssa06),(Omy08,Ssa15))	AORe	NA
Ens106s00006.309	A	Omyk	ENSOMYG00000020007	Omy04	7441311	7533936	+	2	2	((Omy04,Ssa06),(Omy08,Ssa15))	AORe	((Omy04,Ssa06),(Omy08,Ssa15))	AORe	NA
Ens106s00007.154	B	Ssal	ENSSSAG00000074519	Ssa11	41244025	41298669	-	2	2	((Omy06,Ssa26),(Omy26,Ssa11))	LORe	((Omy06,Ssa26),(Omy26,Ssa11))	LORe	NA
Ens106s00007.154	A	Ssal	ENSSSAG00000084287	Ssa26	42608033	42663213	-	2	2	((Omy06,Ssa26),(Omy26,Ssa11))	LORe	((Omy06,Ssa26),(Omy26,Ssa11))	LORe	NA
Ens106s00007.154	A	Omyk	ENSOMYG00000051984	Omy06	88485245	88529195	-	2	2	((Omy06,Ssa26),(Omy26,Ssa11))	LORe	((Omy06,Ssa26),(Omy26,Ssa11))	LORe	NA
Ens106s00007.154	B	Omyk	ENSOMYG00000048144	Omy26	48564017	48616717	-	2	2	((Omy06,Ssa26),(Omy26,Ssa11))	LORe	((Omy06,Ssa26),(Omy26,Ssa11))	LORe	NA
Ens106s00007.167	B	Omyk	ENSOMYG00000054822	Omy30	3467145	3565622	+	1	1	((Omy02,Ssa10),(Omy30,Ssa23))	NA	((Omy02,Ssa10),(Omy30,Ssa23))	AORe	FALSE
Ens106s00007.167	B	Ssal	ENSSSAG00000073314	Ssa23	48340886	48470024	-	1	1	((Omy02,Ssa10),(Omy30,Ssa23))	NA	((Omy02,Ssa10),(Omy30,Ssa23))	AORe	FALSE
Ens106s00007.171	A	Ssal	ENSSSAG00000063273	Ssa24	47516909	47637736	-	1	1	((Omy06,Ssa24),(Omy11,Ssa15))	NA	((Omy06,Ssa24),(Omy11,Ssa15))	AORe	FALSE
Ens106s00007.171	A	Omyk	ENSOMYG00000076209	Omy06	101025	217145	-	1	1	((Omy06,Ssa24),(Omy11,Ssa15))	NA	((Omy06,Ssa24),(Omy11,Ssa15))	AORe	FALSE
Ens106s00007.184	A	Ssal	ENSSSAG00000071386	Ssa24	36401328	36426527	+	2	2	((Omy06,Ssa24),(Omy11,Ssa20))	AORe	((Omy06,Ssa24),(Omy11,Ssa20))	AORe	NA
Ens106s00007.184	A	Omyk	ENSOMYG00000033498	Omy06	12040529	12062637	-	2	2	((Omy06,Ssa24),(Omy11,Ssa20))	AORe	((Omy06,Ssa24),(Omy11,Ssa20))	AORe	NA
Ens106s00007.184	B	Omyk	ENSOMYG00000045443	Omy11	39295771	39334959	-	2	2	((Omy06,Ssa24),(Omy11,Ssa20))	AORe	((Omy06,Ssa24),(Omy11,Ssa20))	AORe	NA
Ens106s00007.184	B	Ssal	ENSSSAG00000075144	Ssa20	6406536	6450066	-	2	2	((Omy06,Ssa24),(Omy11,Ssa20))	AORe	((Omy06,Ssa24),(Omy11,Ssa20))	AORe	NA
Ens106s00007.222	A	Ssal	ENSSSAG00000075134	Ssa17	19289965	19299846	-	2	2	((Omy07,Ssa17),(Omy18,Ssa16))	(((Omy07,Omy18),Ssa17),Ssa16)	((Omy07,Ssa17),(Omy18,Ssa16))	AORe	NA
Ens106s00007.222	B	Omyk	ENSOMYG00000060163	Omy18	18845026	18848434	+	2	2	((Omy07,Ssa17),(Omy18,Ssa16))	(((Omy07,Omy18),Ssa17),Ssa16)	((Omy07,Ssa17),(Omy18,Ssa16))	AORe	NA
Ens106s00007.222	A	Omyk	ENSOMYG00000005646	Omy07	16269901	16276455	+	2	2	((Omy07,Ssa17),(Omy18,Ssa16))	(((Omy07,Omy18),Ssa17),Ssa16)	((Omy07,Ssa17),(Omy18,Ssa16))	AORe	NA
Ens106s00007.222	B	Ssal	ENSSSAG00000079986	Ssa16	72555025	72566466	-	2	2	((Omy07,Ssa17),(Omy18,Ssa16))	(((Omy07,Omy18),Ssa17),Ssa16)	((Omy07,Ssa17),(Omy18,Ssa16))	AORe	NA
Ens106s00007.236	B	Omyk	ENSOMYG00000070575	Omy30	18434411	18471512	-	1	2	((Omy05,Ssa10),(Omy30,Ssa23))	NA	((Omy05,Ssa10),(Omy30,Ssa23))	AORe	NA
Ens106s00007.236	B	Ssal	ENSSSAG00000095544	Ssa23	31481514	31528431	+	1	2	((Omy05,Ssa10),(Omy30,Ssa23))	NA	((Omy05,Ssa10),(Omy30,Ssa23))	AORe	NA
Ens106s00007.236	A	Omyk	ENSOMYG00000029400	Omy05	64668704	64700443	-	1	2	((Omy05,Ssa10),(Omy30,Ssa23))	NA	((Omy05,Ssa10),(Omy30,Ssa23))	AORe	NA
Ens106s00007.246	NA	Omyk	ENSOMYG00000029438	Omy05	64609019	64643327	-	0	1	NA	NA	((Omy05,Ssa10),(Omy30,Ssa23))	AORe	NA
Ens106s00007.257	B	Ssal	ENSSSAG00000074464	Ssa23	31566367	31649911	+	2	2	((Omy05,Ssa10),(Omy30,Ssa23))	AORe	((Omy05,Ssa10),(Omy30,Ssa23))	AORe	NA
Ens106s00007.257	B	Omyk	ENSOMYG00000000278	Omy30	18307370	18391788	-	2	2	((Omy05,Ssa10),(Omy30,Ssa23))	AORe	((Omy05,Ssa10),(Omy30,Ssa23))	AORe	NA
Ens106s00007.257	A	Ssal	ENSSSAG00000063819	Ssa10	22973164	23101872	-	2	2	((Omy05,Ssa10),(Omy30,Ssa23))	AORe	((Omy05,Ssa10),(Omy30,Ssa23))	AORe	NA
Ens106s00007.257	A	Omyk	ENSOMYG00000054334	Omy05	64570149	64587987	-	2	2	((Omy05,Ssa10),(Omy30,Ssa23))	AORe	((Omy05,Ssa10),(Omy30,Ssa23))	AORe	NA
Ens106s00007.269	A	Ssal	ENSSSAG00000063562	Ssa10	22932561	22971444	+	2	2	((Omy05,Ssa10),(Omy30,Ssa23))	AORe	((Omy05,Ssa10),(Omy30,Ssa23))	AORe	NA
Ens106s00007.269	A	Omyk	ENSOMYG00000029345	Omy05	64520896	64566780	+	2	2	((Omy05,Ssa10),(Omy30,Ssa23))	AORe	((Omy05,Ssa10),(Omy30,Ssa23))	AORe	NA
Ens106s00007.269	B	Ssal	ENSSSAG00000082868	Ssa23	31647055	31700123	-	2	2	((Omy05,Ssa10),(Omy30,Ssa23))	AORe	((Omy05,Ssa10),(Omy30,Ssa23))	AORe	NA
Ens106s00007.269	B	Omyk	ENSOMYG00000000391	Omy30	18261009	18304843	+	2	2	((Omy05,Ssa10),(Omy30,Ssa23))	AORe	((Omy05,Ssa10),(Omy30,Ssa23))	AORe	NA
Ens106s00008.179	NA	Ssal	ENSSSAG00000015333	Ssa04	24784346	24786343	-	5	5	NA	NA	((Omy10,Ssa04),(Omy19,Ssa08))	AORe	NA
Ens106s00008.179	NA	Ssal	ENSSSAG00000106001	Ssa04	24789984	24799143	-	5	5	NA	NA	((Omy10,Ssa04),(Omy19,Ssa08))	AORe	NA
Ens106s00008.179	NA	Omyk	ENSOMYG00000069994	Omy10	58097759	58102042	+	5	5	NA	NA	((Omy10,Ssa04),(Omy19,Ssa08))	AORe	NA
Ens106s00008.179	NA	Omyk	ENSOMYG00000047849	Omy10	58086920	58091296	+	5	5	NA	NA	((Omy10,Ssa04),(Omy19,Ssa08))	AORe	NA
Ens106s00008.179	NA	Ssal	ENSSSAG00000097384	Ssa04	24779333	24781073	+	5	5	NA	NA	((Omy10,Ssa04),(Omy19,Ssa08))	AORe	NA
Ens106s00008.179	NA	Omyk	ENSOMYG00000009605	Omy10	58107021	58108962	-	5	5	NA	NA	((Omy10,Ssa04),(Omy19,Ssa08))	AORe	NA
Ens106s00008.179	NA	Ssal	ENSSSAG00000064248	Ssa04	25505109	25506120	+	5	5	NA	NA	((Omy10,Ssa04),(Omy19,Ssa08))	AORe	NA
Ens106s00008.179	NA	Omyk	ENSOMYG00000009468	Omy10	57993830	58082946	+	5	5	NA	NA	((Omy10,Ssa04),(Omy19,Ssa08))	AORe	NA
Ens106s00008.179	NA	Ssal	ENSSSAG00000064183	Ssa04	24851378	24866054	-	5	5	NA	NA	((Omy10,Ssa04),(Omy19,Ssa08))	AORe	NA
Ens106s00008.179	NA	Omyk	ENSOMYG00000008886	Omy10	57591336	57592556	-	5	5	NA	NA	((Omy10,Ssa04),(Omy19,Ssa08))	AORe	NA
Ens106s00008.349	NA	Omyk	ENSOMYG00000061115	Omy10	57786442	57869329	+	0	1	NA	NA	((Omy10,Ssa04),(Omy19,Ssa08))	AORe	NA
Ens106s00009.158	A	Omyk	ENSOMYG00000066705	Omy01	90921866	90983472	-	2	2	((Omy01,Ssa18),(Omy23,Ssa01))	LORe	((Omy01,Ssa18),(Omy23,Ssa01))	LORe	NA
Ens106s00009.158	B	Omyk	ENSOMYG00000057457	Omy23	9000454	9035547	-	2	2	((Omy01,Ssa18),(Omy23,Ssa01))	LORe	((Omy01,Ssa18),(Omy23,Ssa01))	LORe	NA
Ens106s00009.158	B	Ssal	ENSSSAG00000016044	Ssa01	111806319	111857954	-	2	2	((Omy01,Ssa18),(Omy23,Ssa01))	LORe	((Omy01,Ssa18),(Omy23,Ssa01))	LORe	NA
Ens106s00009.158	A	Ssal	ENSSSAG00000010177	Ssa18	38690967	38716073	-	2	2	((Omy01,Ssa18),(Omy23,Ssa01))	LORe	((Omy01,Ssa18),(Omy23,Ssa01))	LORe	NA
Ens106s00009.177	B	Ssal	ENSSSAG00000010698	Ssa11	85627987	85653907	-	2	2	((Omy05,Ssa01),(OmyY,Ssa11))	AORe	((Omy05,Ssa01),(OmyY,Ssa11))	AORe	NA
Ens106s00009.177	B	Omyk	ENSOMYG00000044108	OmyY	25589112	25607053	-	2	2	((Omy05,Ssa01),(OmyY,Ssa11))	AORe	((Omy05,Ssa01),(OmyY,Ssa11))	AORe	NA
Ens106s00009.177	A	Ssal	ENSSSAG00000003368	Ssa01	136824800	136864192	+	2	2	((Omy05,Ssa01),(OmyY,Ssa11))	AORe	((Omy05,Ssa01),(OmyY,Ssa11))	AORe	NA
Ens106s00009.177	A	Omyk	ENSOMYG00000035155	Omy05	34457271	34483435	-	2	2	((Omy05,Ssa01),(OmyY,Ssa11))	AORe	((Omy05,Ssa01),(OmyY,Ssa11))	AORe	NA
Ens106s00009.193	B	Omyk	ENSOMYG00000019815	Omy11	55170720	55190263	-	2	2	((Omy06,Ssa24),(Omy11,Ssa20))	AORe	((Omy06,Ssa24),(Omy11,Ssa20))	AORe	NA
Ens106s00009.193	B	Ssal	ENSSSAG00000068056	Ssa20	23803736	23821465	-	2	2	((Omy06,Ssa24),(Omy11,Ssa20))	AORe	((Omy06,Ssa24),(Omy11,Ssa20))	AORe	NA
Ens106s00009.193	A	Omyk	ENSOMYG00000036591	Omy06	26505816	26530473	-	2	2	((Omy06,Ssa24),(Omy11,Ssa20))	AORe	((Omy06,Ssa24),(Omy11,Ssa20))	AORe	NA
Ens106s00009.193	A	Ssal	ENSSSAG00000080428	Ssa24	21315981	21345082	+	2	2	((Omy06,Ssa24),(Omy11,Ssa20))	AORe	((Omy06,Ssa24),(Omy11,Ssa20))	AORe	NA
Ens106s00009.211	B	Ssal	ENSSSAG00000072697	Ssa13	58701958	58885183	-	2	2	((Omy10,Ssa04),(Omy12,Ssa13))	AORe	((Omy10,Ssa04),(Omy12,Ssa13))	AORe	NA
Ens106s00009.211	B	Omyk	ENSOMYG00000042187	Omy12	51414011	51449861	+	2	2	((Omy10,Ssa04),(Omy12,Ssa13))	AORe	((Omy10,Ssa04),(Omy12,Ssa13))	AORe	NA
Ens106s00009.211	A	Omyk	ENSOMYG00000034680	Omy10	13743164	13798368	-	2	2	((Omy10,Ssa04),(Omy12,Ssa13))	AORe	((Omy10,Ssa04),(Omy12,Ssa13))	AORe	NA
Ens106s00009.211	A	Ssal	ENSSSAG00000055483	Ssa04	75205442	75260666	+	2	2	((Omy10,Ssa04),(Omy12,Ssa13))	AORe	((Omy10,Ssa04),(Omy12,Ssa13))	AORe	NA
Ens106s00009.233	NA	Ssal	ENSSSAG00000096973	Ssa04	3979720	3996495	+	2	2	NA	NA	NA	NA	NA
Ens106s00009.233	NA	Ssal	ENSSSAG00000118926	Ssa08	25069026	25089849	-	2	2	NA	NA	NA	NA	NA
Ens106s00009.233	NA	Omyk	ENSOMYG00000072617	Omy10	85197372	85218537	+	2	2	NA	NA	NA	NA	NA
Ens106s00009.233	NA	Omyk	ENSOMYG00000071801	Omy10	80690508	80713648	+	2	2	NA	NA	NA	NA	NA
Ens106s00009.248	B	Omyk	ENSOMYG00000001957	Omy03	19357094	19405424	+	1	1	((Omy02,Ssa05),(Omy03,Ssa02))	NA	((Omy02,Ssa05),(Omy03,Ssa02))	AORe	FALSE
Ens106s00009.248	B	Ssal	ENSSSAG00000068769	Ssa02	30324406	30373262	+	1	1	((Omy02,Ssa05),(Omy03,Ssa02))	NA	((Omy02,Ssa05),(Omy03,Ssa02))	AORe	FALSE
Ens106s00009.263	A	Ssal	ENSSSAG00000043824	Ssa01	43647101	43667543	+	2	2	((Omy19,Ssa01),(Omy25,Ssa09))	AORe	((Omy19,Ssa01),(Omy25,Ssa09))	AORe	NA
Ens106s00009.263	A	Omyk	ENSOMYG00000036188	Omy19	27526402	27539073	-	2	2	((Omy19,Ssa01),(Omy25,Ssa09))	AORe	((Omy19,Ssa01),(Omy25,Ssa09))	AORe	NA
Ens106s00009.263	B	Ssal	ENSSSAG00000069192	Ssa09	39026293	39050324	+	2	2	((Omy19,Ssa01),(Omy25,Ssa09))	AORe	((Omy19,Ssa01),(Omy25,Ssa09))	AORe	NA
Ens106s00009.263	B	Omyk	ENSOMYG00000041717	Omy25	36296737	36312703	+	2	2	((Omy19,Ssa01),(Omy25,Ssa09))	AORe	((Omy19,Ssa01),(Omy25,Ssa09))	AORe	NA
Ens106s00009.285	B	Omyk	ENSOMYG00000006987	Omy05	95932063	95956744	-	1	1	((Omy01,Ssa16),(Omy05,Ssa10))	NA	((Omy01,Ssa16),(Omy05,Ssa10))	AORe	FALSE
Ens106s00009.285	B	Ssal	ENSSSAG00000072444	Ssa10	55027902	55057961	-	1	1	((Omy01,Ssa16),(Omy05,Ssa10))	NA	((Omy01,Ssa16),(Omy05,Ssa10))	AORe	FALSE
Ens106s00010.51	NA	Ssal	ENSSSAG00000054474	Ssa06	26065233	26071864	+	1	0	NA	NA	((Omy12,Ssa03),(Omy13,Ssa06))	LORe	NA
Ens106s00011.167	B	Ssal	ENSSSAG00000065767	Ssa20	14119883	14125148	+	2	2	((Omy06,Ssa24),(Omy11,Ssa20))	AORe	((Omy06,Ssa24),(Omy11,Ssa20))	AORe	NA
Ens106s00011.167	B	Omyk	ENSOMYG00000013490	Omy11	46127622	46132825	+	2	2	((Omy06,Ssa24),(Omy11,Ssa20))	AORe	((Omy06,Ssa24),(Omy11,Ssa20))	AORe	NA
Ens106s00011.167	A	Ssal	ENSSSAG00000078861	Ssa24	30555387	30562131	-	2	2	((Omy06,Ssa24),(Omy11,Ssa20))	AORe	((Omy06,Ssa24),(Omy11,Ssa20))	AORe	NA
Ens106s00011.167	A	Omyk	ENSOMYG00000002993	Omy06	17636363	17642545	+	2	2	((Omy06,Ssa24),(Omy11,Ssa20))	AORe	((Omy06,Ssa24),(Omy11,Ssa20))	AORe	NA
Ens106s00011.185	B	Ssal	ENSSSAG00000074446	Ssa09	67204365	67276302	+	2	2	((Omy14,Ssa05),(Omy31,Ssa09))	AORe	((Omy14,Ssa05),(Omy31,Ssa09))	AORe	NA
Ens106s00011.185	B	Omyk	ENSOMYG00000022030	Omy31	32952834	32964028	-	2	2	((Omy14,Ssa05),(Omy31,Ssa09))	AORe	((Omy14,Ssa05),(Omy31,Ssa09))	AORe	NA
Ens106s00011.185	A	Ssal	ENSSSAG00000055323	Ssa05	33040319	33058139	+	2	2	((Omy14,Ssa05),(Omy31,Ssa09))	AORe	((Omy14,Ssa05),(Omy31,Ssa09))	AORe	NA
Ens106s00011.185	A	Omyk	ENSOMYG00000036882	Omy14	12969738	12981857	-	2	2	((Omy14,Ssa05),(Omy31,Ssa09))	AORe	((Omy14,Ssa05),(Omy31,Ssa09))	AORe	NA
Ens106s00011.201	B	Ssal	ENSSSAG00000003776	Ssa08	6961143	6989906	+	2	2	((Omy10,Ssa04),(Omy19,Ssa08))	AORe	((Omy10,Ssa04),(Omy19,Ssa08))	AORe	NA
Ens106s00011.201	B	Omyk	ENSOMYG00000005515	Omy19	17579458	17600192	-	2	2	((Omy10,Ssa04),(Omy19,Ssa08))	AORe	((Omy10,Ssa04),(Omy19,Ssa08))	AORe	NA
Ens106s00011.201	A	Omyk	ENSOMYG00000018814	Omy10	61609136	61618482	+	2	2	((Omy10,Ssa04),(Omy19,Ssa08))	AORe	((Omy10,Ssa04),(Omy19,Ssa08))	AORe	NA
Ens106s00011.201	A	Ssal	ENSSSAG00000075280	Ssa04	21164775	21173206	-	2	2	((Omy10,Ssa04),(Omy19,Ssa08))	AORe	((Omy10,Ssa04),(Omy19,Ssa08))	AORe	NA
Ens106s00011.222	A	Omyk	ENSOMYG00000012263	Omy06	22761140	22766003	+	2	2	((Omy06,Ssa24),(Omy11,Ssa20))	AORe	((Omy06,Ssa24),(Omy11,Ssa20))	AORe	NA
Ens106s00011.222	A	Ssal	ENSSSAG00000069496	Ssa24	25121345	25128167	-	2	2	((Omy06,Ssa24),(Omy11,Ssa20))	AORe	((Omy06,Ssa24),(Omy11,Ssa20))	AORe	NA
Ens106s00011.222	B	Ssal	ENSSSAG00000076427	Ssa20	19760134	19766721	+	2	2	((Omy06,Ssa24),(Omy11,Ssa20))	AORe	((Omy06,Ssa24),(Omy11,Ssa20))	AORe	NA
Ens106s00011.222	B	Omyk	ENSOMYG00000041139	Omy11	51435681	51441990	+	2	2	((Omy06,Ssa24),(Omy11,Ssa20))	AORe	((Omy06,Ssa24),(Omy11,Ssa20))	AORe	NA
Ens106s00011.238	A	Omyk	ENSOMYG00000043101	Omy05	14059936	14080115	-	1	1	((Omy05,Ssa01),(OmyY,Ssa11))	NA	((Omy05,Ssa01),(OmyY,Ssa11))	AORe	FALSE
Ens106s00011.238	A	Ssal	ENSSSAG00000065463	Ssa01	159223380	159244884	+	1	1	((Omy05,Ssa01),(OmyY,Ssa11))	NA	((Omy05,Ssa01),(OmyY,Ssa11))	AORe	FALSE
Ens106s00011.248	B	Ssal	ENSSSAG00000104404	Ssa20	19766578	19771355	+	1	1	((Omy06,Ssa24),(Omy11,Ssa20))	NA	((Omy06,Ssa24),(Omy11,Ssa20))	AORe	FALSE
Ens106s00011.248	B	Omyk	ENSOMYG00000041215	Omy11	51442008	51445552	+	1	1	((Omy06,Ssa24),(Omy11,Ssa20))	NA	((Omy06,Ssa24),(Omy11,Ssa20))	AORe	FALSE
Ens106s00011.264	A	Ssal	ENSSSAG00000061104	Ssa04	81505711	81619276	-	2	2	((Omy10,Ssa04),(Omy12,Ssa13))	AORe	((Omy10,Ssa04),(Omy12,Ssa13))	AORe	NA
Ens106s00011.264	A	Omyk	ENSOMYG00000060599	Omy10	7732631	7782220	+	2	2	((Omy10,Ssa04),(Omy12,Ssa13))	AORe	((Omy10,Ssa04),(Omy12,Ssa13))	AORe	NA
Ens106s00011.264	B	Ssal	ENSSSAG00000039817	Ssa13	52870592	52929130	+	2	2	((Omy10,Ssa04),(Omy12,Ssa13))	AORe	((Omy10,Ssa04),(Omy12,Ssa13))	AORe	NA
Ens106s00011.264	B	Omyk	ENSOMYG00000007959	Omy12	57043785	57089893	-	2	2	((Omy10,Ssa04),(Omy12,Ssa13))	AORe	((Omy10,Ssa04),(Omy12,Ssa13))	AORe	NA
Ens106s00011.284	A	Ssal	ENSSSAG00000076337	Ssa09	129940594	129947743	-	1	2	((Omy24,Ssa09),(Omy27,Ssa20))	NA	((Omy24,Ssa09),(Omy27,Ssa20))	AORe	NA
Ens106s00011.284	A	Omyk	ENSOMYG00000031494	Omy24	17640227	17657545	-	1	2	((Omy24,Ssa09),(Omy27,Ssa20))	NA	((Omy24,Ssa09),(Omy27,Ssa20))	AORe	NA
Ens106s00011.284	B	Omyk	ENSOMYG00000038689	Omy27	20416950	20425894	-	1	2	((Omy24,Ssa09),(Omy27,Ssa20))	NA	((Omy24,Ssa09),(Omy27,Ssa20))	AORe	NA
Ens106s00011.297	A	Ssal	ENSSSAG00000008442	Ssa04	57373334	57396938	+	2	2	((Omy10,Ssa04),(Omy12,Ssa13))	AORe	((Omy10,Ssa04),(Omy12,Ssa13))	AORe	NA
Ens106s00011.297	A	Omyk	ENSOMYG00000002107	Omy10	30023098	30040962	-	2	2	((Omy10,Ssa04),(Omy12,Ssa13))	AORe	((Omy10,Ssa04),(Omy12,Ssa13))	AORe	NA
Ens106s00011.297	B	Omyk	ENSOMYG00000026202	Omy12	34778445	34804532	+	2	2	((Omy10,Ssa04),(Omy12,Ssa13))	AORe	((Omy10,Ssa04),(Omy12,Ssa13))	AORe	NA
Ens106s00011.297	B	Ssal	ENSSSAG00000085000	Ssa13	77301662	77331434	-	2	2	((Omy10,Ssa04),(Omy12,Ssa13))	AORe	((Omy10,Ssa04),(Omy12,Ssa13))	AORe	NA
Ens106s00012.128	NA	Ssal	ENSSSAG00000065232	Ssa16	27741381	27759381	-	3	4	NA	NA	((Omy01,Ssa16),(Omy02,Ssa10))	AORe	NA
Ens106s00012.128	NA	Omyk	ENSOMYG00000043404	Omy01	31322227	31342418	+	3	4	NA	NA	((Omy01,Ssa16),(Omy02,Ssa10))	AORe	NA
Ens106s00012.128	NA	Omyk	ENSOMYG00000046950	Omy06	78366041	78378466	+	3	4	NA	NA	((Omy06,Ssa26),(Omy26,Ssa11))	LORe	NA
Ens106s00012.128	NA	Omyk	ENSOMYG00000063125	Omy26	38666651	38679123	+	3	4	NA	NA	((Omy06,Ssa26),(Omy26,Ssa11))	LORe	NA
Ens106s00012.128	NA	Ssal	ENSSSAG00000073031	Ssa26	30895943	30919293	+	3	4	NA	NA	((Omy06,Ssa26),(Omy26,Ssa11))	LORe	NA
Ens106s00012.128	NA	Ssal	ENSSSAG00000046287	Ssa11	30699998	30714291	+	3	4	NA	NA	((Omy06,Ssa26),(Omy26,Ssa11))	LORe	NA
Ens106s00012.128	NA	Omyk	ENSOMYG00000029405	Omy02	73055549	73068801	+	3	4	NA	NA	((Omy01,Ssa16),(Omy02,Ssa10))	AORe	NA
Ens106s00012.151	NA	Ssal	ENSSSAG00000108555	Ssa10	91189512	91204148	+	1	0	NA	NA	((Omy01,Ssa16),(Omy02,Ssa10))	AORe	NA
Ens106s00012.161	A	Ssal	ENSSSAG00000069078	Ssa01	164416446	164454356	+	1	1	((Omy05,Ssa01),(OmyY,Ssa11))	NA	((Omy05,Ssa01),(OmyY,Ssa11))	AORe	FALSE
Ens106s00012.161	A	Omyk	ENSOMYG00000009972	Omy05	9881114	9911266	-	1	1	((Omy05,Ssa01),(OmyY,Ssa11))	NA	((Omy05,Ssa01),(OmyY,Ssa11))	AORe	FALSE
Ens106s00012.177	B	Omyk	ENSOMYG00000009100	Omy05	60368256	60393888	+	2	2	((Omy01,Ssa16),(Omy05,Ssa10))	AORe	((Omy01,Ssa16),(Omy05,Ssa10))	AORe	NA
Ens106s00012.177	B	Ssal	ENSSSAG00000006864	Ssa10	18942132	18985796	+	2	2	((Omy01,Ssa16),(Omy05,Ssa10))	AORe	((Omy01,Ssa16),(Omy05,Ssa10))	AORe	NA
Ens106s00012.177	A	Omyk	ENSOMYG00000000926	Omy01	19510949	19535846	+	2	2	((Omy01,Ssa16),(Omy05,Ssa10))	AORe	((Omy01,Ssa16),(Omy05,Ssa10))	AORe	NA
Ens106s00012.177	A	Ssal	ENSSSAG00000105130	Ssa16	40348530	40379330	-	2	2	((Omy01,Ssa16),(Omy05,Ssa10))	AORe	((Omy01,Ssa16),(Omy05,Ssa10))	AORe	NA
Ens106s00012.187	A	Ssal	ENSSSAG00000064967	Ssa14	44897862	44915841	+	1	1	((Omy08,Ssa14),(Omy28,Ssa03))	NA	((Omy08,Ssa14),(Omy28,Ssa03))	AORe	FALSE
Ens106s00012.187	A	Omyk	ENSOMYG00000002709	Omy08	83712153	83727636	+	1	1	((Omy08,Ssa14),(Omy28,Ssa03))	NA	((Omy08,Ssa14),(Omy28,Ssa03))	AORe	FALSE
Ens106s00012.202	B	Ssal	ENSSSAG00000084003	Ssa02	32935372	32961684	+	2	1	((Omy02,Ssa05),(Omy03,Ssa02))	NA	((Omy02,Ssa05),(Omy03,Ssa02))	AORe	NA
Ens106s00012.202	B	Omyk	ENSOMYG00000002713	Omy03	21856789	21884641	+	2	1	((Omy02,Ssa05),(Omy03,Ssa02))	NA	((Omy02,Ssa05),(Omy03,Ssa02))	AORe	NA
Ens106s00012.202	A	Ssal	ENSSSAG00000113069	Ssa05	61398293	61425950	-	2	1	((Omy02,Ssa05),(Omy03,Ssa02))	NA	((Omy02,Ssa05),(Omy03,Ssa02))	AORe	NA
Ens106s00012.209	B	Omyk	ENSOMYG00000012766	Omy32	28854418	28919780	-	1	1	((Omy18,Ssa27),(Omy32,Ssa14))	NA	((Omy18,Ssa27),(Omy32,Ssa14))	AORe	FALSE
Ens106s00012.209	B	Ssal	ENSSSAG00000007064	Ssa14	69485934	69521626	+	1	1	((Omy18,Ssa27),(Omy32,Ssa14))	NA	((Omy18,Ssa27),(Omy32,Ssa14))	AORe	FALSE
Ens106s00012.214	A	Omyk	ENSOMYG00000030887	Omy18	44857429	44890749	+	1	1	((Omy18,Ssa27),(Omy32,Ssa14))	NA	((Omy18,Ssa27),(Omy32,Ssa14))	AORe	FALSE
Ens106s00012.214	A	Ssal	ENSSSAG00000009656	Ssa27	15642039	15677972	+	1	1	((Omy18,Ssa27),(Omy32,Ssa14))	NA	((Omy18,Ssa27),(Omy32,Ssa14))	AORe	FALSE
Ens106s00012.222	NA	Omyk	ENSOMYG00000003765	Omy02	30321984	30349849	+	0	1	NA	NA	((Omy02,Ssa05),(Omy03,Ssa02))	AORe	NA
Ens106s00013.150	NA	Omyk	ENSOMYG00000042907	Omy02	59816740	59823556	-	0	1	NA	NA	((Omy02,Ssa10),(Omy30,Ssa23))	AORe	NA
Ens106s00013.157	A	Ssal	ENSSSAG00000074188	Ssa17	55277946	55284629	-	1	1	((Omy15,Ssa17),(Omy21,Ssa07))	NA	((Omy15,Ssa17),(Omy21,Ssa07))	AORe	FALSE
Ens106s00013.157	A	Omyk	ENSOMYG00000032359	Omy15	52127205	52132709	-	1	1	((Omy15,Ssa17),(Omy21,Ssa07))	NA	((Omy15,Ssa17),(Omy21,Ssa07))	AORe	FALSE
Ens106s00013.169	NA	Omyk	ENSOMYG00000042108	Omy30	12453729	12459005	-	0	1	NA	NA	((Omy02,Ssa10),(Omy30,Ssa23))	AORe	NA
Ens106s00013.179	B	Ssal	ENSSSAG00000072432	Ssa23	37918431	37953753	+	2	2	((Omy02,Ssa10),(Omy30,Ssa23))	AORe	((Omy02,Ssa10),(Omy30,Ssa23))	AORe	NA
Ens106s00013.179	B	Omyk	ENSOMYG00000042913	Omy30	12462197	12469756	-	2	2	((Omy02,Ssa10),(Omy30,Ssa23))	AORe	((Omy02,Ssa10),(Omy30,Ssa23))	AORe	NA
Ens106s00013.179	A	Omyk	ENSOMYG00000042113	Omy02	59827891	59830670	-	2	2	((Omy02,Ssa10),(Omy30,Ssa23))	AORe	((Omy02,Ssa10),(Omy30,Ssa23))	AORe	NA
Ens106s00013.179	A	Ssal	ENSSSAG00000078037	Ssa10	77636293	77666333	-	2	2	((Omy02,Ssa10),(Omy30,Ssa23))	AORe	((Omy02,Ssa10),(Omy30,Ssa23))	AORe	NA
Ens106s00013.198	A	Ssal	ENSSSAG00000078041	Ssa10	77707115	77720817	-	1	1	((Omy02,Ssa10),(Omy30,Ssa23))	NA	((Omy02,Ssa10),(Omy30,Ssa23))	AORe	FALSE
Ens106s00013.198	A	Omyk	ENSOMYG00000042916	Omy02	59875565	59886035	-	1	1	((Omy02,Ssa10),(Omy30,Ssa23))	NA	((Omy02,Ssa10),(Omy30,Ssa23))	AORe	FALSE
Ens106s00013.213	B	Omyk	ENSOMYG00000012748	Omy17	79390074	79394286	+	2	2	((Omy07,Ssa22),(Omy17,Ssa12))	AORe	((Omy07,Ssa22),(Omy17,Ssa12))	AORe	NA
Ens106s00013.213	B	Ssal	ENSSSAG00000039967	Ssa12	84282908	84289783	+	2	2	((Omy07,Ssa22),(Omy17,Ssa12))	AORe	((Omy07,Ssa22),(Omy17,Ssa12))	AORe	NA
Ens106s00013.213	A	Omyk	ENSOMYG00000012095	Omy07	43428558	43432833	-	2	2	((Omy07,Ssa22),(Omy17,Ssa12))	AORe	((Omy07,Ssa22),(Omy17,Ssa12))	AORe	NA
Ens106s00013.213	A	Ssal	ENSSSAG00000121587	Ssa22	12079764	12089928	-	2	2	((Omy07,Ssa22),(Omy17,Ssa12))	AORe	((Omy07,Ssa22),(Omy17,Ssa12))	AORe	NA
Ens106s00013.225	B	Omyk	ENSOMYG00000013841	Omy17	48586556	48594778	-	2	2	((Omy07,Ssa22),(Omy17,Ssa12))	AORe	((Omy07,Ssa22),(Omy17,Ssa12))	AORe	NA
Ens106s00013.225	B	Ssal	ENSSSAG00000041411	Ssa12	51848683	51859570	-	2	2	((Omy07,Ssa22),(Omy17,Ssa12))	AORe	((Omy07,Ssa22),(Omy17,Ssa12))	AORe	NA
Ens106s00013.225	A	Ssal	ENSSSAG00000065832	Ssa22	43306329	43334121	+	2	2	((Omy07,Ssa22),(Omy17,Ssa12))	AORe	((Omy07,Ssa22),(Omy17,Ssa12))	AORe	NA
Ens106s00013.225	A	Omyk	ENSOMYG00000009671	Omy07	72507088	72519025	+	2	2	((Omy07,Ssa22),(Omy17,Ssa12))	AORe	((Omy07,Ssa22),(Omy17,Ssa12))	AORe	NA
Ens106s00013.247	B	Omyk	ENSOMYG00000035091	Omy16	54950556	54957246	+	1	1	((Omy09,Ssa15),(Omy16,Ssa13))	NA	((Omy09,Ssa15),(Omy16,Ssa13))	AORe	FALSE
Ens106s00013.247	B	Ssal	ENSSSAG00000038738	Ssa13	27087950	27098800	-	1	1	((Omy09,Ssa15),(Omy16,Ssa13))	NA	((Omy09,Ssa15),(Omy16,Ssa13))	AORe	FALSE
Ens106s00013.259	A	Omyk	ENSOMYG00000047759	Omy09	41084647	41086037	+	1	1	((Omy09,Ssa15),(Omy16,Ssa13))	NA	((Omy09,Ssa15),(Omy16,Ssa13))	AORe	FALSE
Ens106s00013.259	A	Ssal	ENSSSAG00000067487	Ssa15	68196181	68198316	+	1	1	((Omy09,Ssa15),(Omy16,Ssa13))	NA	((Omy09,Ssa15),(Omy16,Ssa13))	AORe	FALSE
Ens106s00013.274	B	Omyk	ENSOMYG00000012756	Omy17	79398442	79401102	+	1	1	((Omy07,Ssa22),(Omy17,Ssa12))	NA	((Omy07,Ssa22),(Omy17,Ssa12))	AORe	FALSE
Ens106s00013.274	B	Ssal	ENSSSAG00000039993	Ssa12	84291229	84293806	+	1	1	((Omy07,Ssa22),(Omy17,Ssa12))	NA	((Omy07,Ssa22),(Omy17,Ssa12))	AORe	FALSE
Ens106s00014.154	A	Ssal	ENSSSAG00000050275	Ssa01	156613420	156650683	+	2	2	((Omy05,Ssa01),(OmyY,Ssa11))	AORe	((Omy05,Ssa01),(OmyY,Ssa11))	AORe	NA
Ens106s00014.154	A	Omyk	ENSOMYG00000005529	Omy05	16482933	16505052	-	2	2	((Omy05,Ssa01),(OmyY,Ssa11))	AORe	((Omy05,Ssa01),(OmyY,Ssa11))	AORe	NA
Ens106s00014.154	B	Omyk	ENSOMYG00000026625	OmyY	2238903	2254605	+	2	2	((Omy05,Ssa01),(OmyY,Ssa11))	AORe	((Omy05,Ssa01),(OmyY,Ssa11))	AORe	NA
Ens106s00014.154	B	Ssal	ENSSSAG00000006939	Ssa11	64437051	64456723	-	2	2	((Omy05,Ssa01),(OmyY,Ssa11))	AORe	((Omy05,Ssa01),(OmyY,Ssa11))	AORe	NA
Ens106s00014.167	A	Omyk	ENSOMYG00000021558	Omy06	50548347	50629507	+	1	1	((Omy06,Ssa26),(Omy26,Ssa11))	NA	NA	NA	NA
Ens106s00014.167	A	Ssal	ENSSSAG00000046445	Ssa26	2742405	2834552	+	1	1	((Omy06,Ssa26),(Omy26,Ssa11))	NA	NA	NA	NA
Ens106s00014.182	A	Omyk	ENSOMYG00000047401	Omy01	81179165	81272221	-	2	2	((Omy01,Ssa18),(Omy23,Ssa01))	AORe	((Omy01,Ssa18),(Omy23,Ssa01))	AORe	NA
Ens106s00014.182	A	Ssal	ENSSSAG00000108831	Ssa18	28116123	28355773	-	2	2	((Omy01,Ssa18),(Omy23,Ssa01))	AORe	((Omy01,Ssa18),(Omy23,Ssa01))	AORe	NA
Ens106s00014.182	B	Omyk	ENSOMYG00000047722	Omy23	32655040	32789730	-	2	2	((Omy01,Ssa18),(Omy23,Ssa01))	AORe	((Omy01,Ssa18),(Omy23,Ssa01))	AORe	NA
Ens106s00014.182	B	Ssal	ENSSSAG00000074209	Ssa01	73362056	73623649	-	2	2	((Omy01,Ssa18),(Omy23,Ssa01))	AORe	((Omy01,Ssa18),(Omy23,Ssa01))	AORe	NA
Ens106s00014.198	A	Ssal	ENSSSAG00000075339	Ssa19	39131571	39525459	+	1	1	((Omy16,Ssa19),(Omy20,Ssa28))	NA	((Omy16,Ssa19),(Omy20,Ssa28))	AORe	FALSE
Ens106s00014.198	A	Omyk	ENSOMYG00000005452	Omy16	4736039	4968212	+	1	1	((Omy16,Ssa19),(Omy20,Ssa28))	NA	((Omy16,Ssa19),(Omy20,Ssa28))	AORe	FALSE
Ens106s00014.214	B	Omyk	ENSOMYG00000049756	Omy26	48937643	49046635	-	2	2	((Omy06,Ssa26),(Omy26,Ssa11))	LORe	((Omy06,Ssa26),(Omy26,Ssa11))	LORe	NA
Ens106s00014.214	A	Omyk	ENSOMYG00000070434	Omy06	88828151	88894258	-	2	2	((Omy06,Ssa26),(Omy26,Ssa11))	LORe	((Omy06,Ssa26),(Omy26,Ssa11))	LORe	NA
Ens106s00014.214	B	Ssal	ENSSSAG00000101551	Ssa11	41553951	41657442	-	2	2	((Omy06,Ssa26),(Omy26,Ssa11))	LORe	((Omy06,Ssa26),(Omy26,Ssa11))	LORe	NA
Ens106s00014.214	A	Ssal	ENSSSAG00000085914	Ssa26	42977722	43116612	-	2	2	((Omy06,Ssa26),(Omy26,Ssa11))	LORe	((Omy06,Ssa26),(Omy26,Ssa11))	LORe	NA
Ens106s00014.230	B	Omyk	ENSOMYG00000071075	Omy30	3276580	3323316	+	2	2	((Omy02,Ssa10),(Omy30,Ssa23))	AORe	((Omy02,Ssa10),(Omy30,Ssa23))	AORe	NA
Ens106s00014.230	B	Ssal	ENSSSAG00000073337	Ssa23	48633403	48677254	-	2	2	((Omy02,Ssa10),(Omy30,Ssa23))	AORe	((Omy02,Ssa10),(Omy30,Ssa23))	AORe	NA
Ens106s00014.230	A	Omyk	ENSOMYG00000033714	Omy02	103087436	103121710	+	2	2	((Omy02,Ssa10),(Omy30,Ssa23))	AORe	((Omy02,Ssa10),(Omy30,Ssa23))	AORe	NA
Ens106s00014.230	A	Ssal	ENSSSAG00000082518	Ssa10	125053673	125120280	-	2	2	((Omy02,Ssa10),(Omy30,Ssa23))	AORe	((Omy02,Ssa10),(Omy30,Ssa23))	AORe	NA
Ens106s00014.251	B	Ssal	ENSSSAG00000045074	Ssa15	9478161	9498393	+	2	2	((Omy06,Ssa24),(Omy11,Ssa15))	AORe	((Omy06,Ssa24),(Omy11,Ssa15))	AORe	NA
Ens106s00014.251	B	Omyk	ENSOMYG00000003682	Omy11	83308955	83339046	+	2	2	((Omy06,Ssa24),(Omy11,Ssa15))	AORe	((Omy06,Ssa24),(Omy11,Ssa15))	AORe	NA
Ens106s00014.251	A	Omyk	ENSOMYG00000031492	Omy06	1961611	1973855	-	2	2	((Omy06,Ssa24),(Omy11,Ssa15))	AORe	((Omy06,Ssa24),(Omy11,Ssa15))	AORe	NA
Ens106s00014.251	A	Ssal	ENSSSAG00000063251	Ssa24	47383381	47393209	-	2	2	((Omy06,Ssa24),(Omy11,Ssa15))	AORe	((Omy06,Ssa24),(Omy11,Ssa15))	AORe	NA
Ens106s00014.268	A	Omyk	ENSOMYG00000026996	Omy05	63505430	63534934	-	2	2	((Omy05,Ssa10),(Omy30,Ssa23))	AORe	((Omy05,Ssa10),(Omy30,Ssa23))	AORe	NA
Ens106s00014.268	A	Ssal	ENSSSAG00000060551	Ssa10	21975669	22001245	-	2	2	((Omy05,Ssa10),(Omy30,Ssa23))	AORe	((Omy05,Ssa10),(Omy30,Ssa23))	AORe	NA
Ens106s00014.268	B	Omyk	ENSOMYG00000024328	Omy30	17210581	17219108	-	2	2	((Omy05,Ssa10),(Omy30,Ssa23))	AORe	((Omy05,Ssa10),(Omy30,Ssa23))	AORe	NA
Ens106s00014.268	B	Ssal	ENSSSAG00000009906	Ssa23	32653247	32719316	+	2	2	((Omy05,Ssa10),(Omy30,Ssa23))	AORe	((Omy05,Ssa10),(Omy30,Ssa23))	AORe	NA
Ens106s00014.283	A	Omyk	ENSOMYG00000019044	Omy08	78301944	78313531	-	1	1	((Omy08,Ssa14),(Omy28,Ssa03))	NA	((Omy08,Ssa14),(Omy28,Ssa03))	AORe	FALSE
Ens106s00014.283	A	Ssal	ENSSSAG00000080484	Ssa14	38623231	38634585	-	1	1	((Omy08,Ssa14),(Omy28,Ssa03))	NA	((Omy08,Ssa14),(Omy28,Ssa03))	AORe	FALSE
Ens106s00015.256	NA	Ssal	ENSSSAG00000070089	Ssa14	21052862	21053598	+	7	5	NA	NA	((Omy08,Ssa14),(Omy28,Ssa03))	AORe	NA
Ens106s00015.256	NA	Omyk	ENSOMYG00000002345	Omy08	61793756	61795538	+	7	5	NA	NA	((Omy08,Ssa14),(Omy28,Ssa03))	AORe	NA
Ens106s00015.256	NA	Ssal	ENSSSAG00000063077	Ssa14	20747244	20753553	+	7	5	NA	NA	((Omy08,Ssa14),(Omy28,Ssa03))	AORe	NA
Ens106s00015.256	NA	Ssal	ENSSSAG00000070152	Ssa14	21084886	21085767	+	7	5	NA	NA	((Omy08,Ssa14),(Omy28,Ssa03))	AORe	NA
Ens106s00015.256	NA	Ssal	ENSSSAG00000115044	Ssa14	20796419	20844320	+	7	5	NA	NA	((Omy08,Ssa14),(Omy28,Ssa03))	AORe	NA
Ens106s00015.256	NA	Omyk	ENSOMYG00000073464	Omy08	61374529	61376253	+	7	5	NA	NA	((Omy08,Ssa14),(Omy28,Ssa03))	AORe	NA
Ens106s00015.256	NA	Ssal	ENSSSAG00000121833	Ssa14	20694822	20696117	+	7	5	NA	NA	((Omy08,Ssa14),(Omy28,Ssa03))	AORe	NA
Ens106s00015.256	NA	Omyk	ENSOMYG00000040449	Omy08	61838273	61840265	+	7	5	NA	NA	((Omy08,Ssa14),(Omy28,Ssa03))	AORe	NA
Ens106s00015.256	NA	Ssal	ENSSSAG00000070187	Ssa14	20741240	20742509	+	7	5	NA	NA	((Omy08,Ssa14),(Omy28,Ssa03))	AORe	NA
Ens106s00015.256	NA	Omyk	ENSOMYG00000001666	Omy08	61467091	61468104	+	7	5	NA	NA	((Omy08,Ssa14),(Omy28,Ssa03))	AORe	NA
Ens106s00015.256	NA	Ssal	ENSSSAG00000119158	Ssa14	20762680	20763577	+	7	5	NA	NA	((Omy08,Ssa14),(Omy28,Ssa03))	AORe	NA
Ens106s00015.256	NA	Omyk	ENSOMYG00000040459	Omy08	61383843	61489010	+	7	5	NA	NA	((Omy08,Ssa14),(Omy28,Ssa03))	AORe	NA
Ens106s00015.301	NA	Ssal	ENSSSAG00000116060	Ssa14	21382127	21382970	+	5	2	NA	NA	((Omy08,Ssa14),(Omy28,Ssa03))	AORe	NA
Ens106s00015.301	NA	Ssal	ENSSSAG00000070185	Ssa14	21325298	21338235	+	5	2	NA	NA	((Omy08,Ssa14),(Omy28,Ssa03))	AORe	NA
Ens106s00015.301	NA	Ssal	ENSSSAG00000109382	Ssa14	20843840	20845525	+	5	2	NA	NA	((Omy08,Ssa14),(Omy28,Ssa03))	AORe	NA
Ens106s00015.301	NA	Ssal	ENSSSAG00000110923	Ssa14	20763747	20764468	+	5	2	NA	NA	((Omy08,Ssa14),(Omy28,Ssa03))	AORe	NA
Ens106s00015.301	NA	Omyk	ENSOMYG00000001775	Omy08	61430117	61430718	+	5	2	NA	NA	((Omy08,Ssa14),(Omy28,Ssa03))	AORe	NA
Ens106s00015.301	NA	Omyk	ENSOMYG00000001719	Omy08	61384096	61515679	+	5	2	NA	NA	((Omy08,Ssa14),(Omy28,Ssa03))	AORe	NA
Ens106s00015.301	NA	Ssal	ENSSSAG00000104286	Ssa14	20881602	20883506	+	5	2	NA	NA	((Omy08,Ssa14),(Omy28,Ssa03))	AORe	NA
Ens106s00015.321	NA	Ssal	ENSSSAG00000067351	Ssa14	21321533	21322072	+	6	2	NA	NA	((Omy08,Ssa14),(Omy28,Ssa03))	AORe	NA
Ens106s00015.321	NA	Ssal	ENSSSAG00000097973	Ssa14	21377798	21378831	+	6	2	NA	NA	((Omy08,Ssa14),(Omy28,Ssa03))	AORe	NA
Ens106s00015.321	NA	Omyk	ENSOMYG00000061051	Omy08	61829343	61830284	+	6	2	NA	NA	((Omy08,Ssa14),(Omy28,Ssa03))	AORe	NA
Ens106s00015.321	NA	Ssal	ENSSSAG00000083525	Ssa14	20777938	20779580	+	6	2	NA	NA	((Omy08,Ssa14),(Omy28,Ssa03))	AORe	NA
Ens106s00015.321	NA	Ssal	ENSSSAG00000082710	Ssa14	20829017	20829788	+	6	2	NA	NA	((Omy08,Ssa14),(Omy28,Ssa03))	AORe	NA
Ens106s00015.321	NA	Ssal	ENSSSAG00000070122	Ssa14	21053780	21054615	+	6	2	NA	NA	((Omy08,Ssa14),(Omy28,Ssa03))	AORe	NA
Ens106s00015.321	NA	Ssal	ENSSSAG00000121526	Ssa14	21093713	21094566	+	6	2	NA	NA	((Omy08,Ssa14),(Omy28,Ssa03))	AORe	NA
Ens106s00015.321	NA	Omyk	ENSOMYG00000002331	Omy08	61671830	61816584	+	6	2	NA	NA	((Omy08,Ssa14),(Omy28,Ssa03))	AORe	NA
Ens106s00015.377	NA	Omyk	ENSOMYG00000001836	Omy08	61560461	61564314	+	4	5	NA	NA	((Omy08,Ssa14),(Omy28,Ssa03))	AORe	NA
Ens106s00015.377	NA	Omyk	ENSOMYG00000001910	Omy08	61628322	61629631	+	4	5	NA	NA	((Omy08,Ssa14),(Omy28,Ssa03))	AORe	NA
Ens106s00015.377	NA	Omyk	ENSOMYG00000050472	Omy08	61630867	61632186	+	4	5	NA	NA	((Omy08,Ssa14),(Omy28,Ssa03))	AORe	NA
Ens106s00015.377	NA	Omyk	ENSOMYG00000077882	Omy08	61455279	61456220	+	4	5	NA	NA	((Omy08,Ssa14),(Omy28,Ssa03))	AORe	NA
Ens106s00015.377	NA	Omyk	ENSOMYG00000066850	Omy08	61670023	61830579	+	4	5	NA	NA	((Omy08,Ssa14),(Omy28,Ssa03))	AORe	NA
Ens106s00015.377	NA	Ssal	ENSSSAG00000070183	Ssa14	21312779	21313758	+	4	5	NA	NA	((Omy08,Ssa14),(Omy28,Ssa03))	AORe	NA
Ens106s00015.377	NA	Ssal	ENSSSAG00000105337	Ssa14	21360583	21372093	+	4	5	NA	NA	((Omy08,Ssa14),(Omy28,Ssa03))	AORe	NA
Ens106s00015.377	NA	Ssal	ENSSSAG00000087148	Ssa14	21029715	21030361	+	4	5	NA	NA	((Omy08,Ssa14),(Omy28,Ssa03))	AORe	NA
Ens106s00015.377	NA	Ssal	ENSSSAG00000090357	Ssa14	21176224	21176849	+	4	5	NA	NA	((Omy08,Ssa14),(Omy28,Ssa03))	AORe	NA
Ens106s00015.425	NA	Ssal	ENSSSAG00000119391	Ssa14	21390886	21392683	+	2	0	NA	NA	((Omy08,Ssa14),(Omy28,Ssa03))	AORe	NA
Ens106s00015.425	NA	Ssal	ENSSSAG00000070189	Ssa14	21335792	21338374	+	2	0	NA	NA	((Omy08,Ssa14),(Omy28,Ssa03))	AORe	NA
Ens106s00015.431	A	Omyk	ENSOMYG00000002434	Omy08	61825340	61826027	+	1	1	((Omy08,Ssa14),(Omy28,Ssa03))	NA	((Omy08,Ssa14),(Omy28,Ssa03))	AORe	FALSE
Ens106s00015.431	A	Ssal	ENSSSAG00000067362	Ssa14	21310714	21311364	+	1	1	((Omy08,Ssa14),(Omy28,Ssa03))	NA	((Omy08,Ssa14),(Omy28,Ssa03))	AORe	FALSE
Ens106s00015.438	NA	Omyk	ENSOMYG00000008257	Omy08	61487119	61488916	+	6	5	NA	NA	((Omy08,Ssa14),(Omy28,Ssa03))	AORe	NA
Ens106s00015.438	NA	Ssal	ENSSSAG00000089862	Ssa14	20994108	20994883	+	6	5	NA	NA	((Omy08,Ssa14),(Omy28,Ssa03))	AORe	NA
Ens106s00015.438	NA	Ssal	ENSSSAG00000070072	Ssa14	20713978	20714636	+	6	5	NA	NA	((Omy08,Ssa14),(Omy28,Ssa03))	AORe	NA
Ens106s00015.438	NA	Ssal	ENSSSAG00000070127	Ssa14	21020135	21020638	+	6	5	NA	NA	((Omy08,Ssa14),(Omy28,Ssa03))	AORe	NA
Ens106s00015.438	NA	Omyk	ENSOMYG00000057195	Omy08	61369640	61371527	+	6	5	NA	NA	((Omy08,Ssa14),(Omy28,Ssa03))	AORe	NA
Ens106s00015.438	NA	Omyk	ENSOMYG00000040431	Omy08	61341741	61343600	+	6	5	NA	NA	((Omy08,Ssa14),(Omy28,Ssa03))	AORe	NA
Ens106s00015.438	NA	Ssal	ENSSSAG00000070068	Ssa14	20694376	20696314	+	6	5	NA	NA	((Omy08,Ssa14),(Omy28,Ssa03))	AORe	NA
Ens106s00015.438	NA	Ssal	ENSSSAG00000084854	Ssa14	21280713	21286160	+	6	5	NA	NA	((Omy08,Ssa14),(Omy28,Ssa03))	AORe	NA
Ens106s00015.438	NA	Omyk	ENSOMYG00000040445	Omy08	61809720	61810547	+	6	5	NA	NA	((Omy08,Ssa14),(Omy28,Ssa03))	AORe	NA
Ens106s00015.438	NA	Omyk	ENSOMYG00000040443	Omy08	61344577	61356573	+	6	5	NA	NA	((Omy08,Ssa14),(Omy28,Ssa03))	AORe	NA
Ens106s00015.438	NA	Ssal	ENSSSAG00000070087	Ssa14	20724520	20725450	+	6	5	NA	NA	((Omy08,Ssa14),(Omy28,Ssa03))	AORe	NA
Ens106s00016.150	A	Omyk	ENSOMYG00000006124	Omy10	69050543	69089570	+	2	2	((Omy10,Ssa04),(Omy19,Ssa08))	LORe	((Omy10,Ssa04),(Omy19,Ssa08))	LORe	NA
Ens106s00016.150	B	Omyk	ENSOMYG00000007115	Omy19	10082742	10124459	-	2	2	((Omy10,Ssa04),(Omy19,Ssa08))	LORe	((Omy10,Ssa04),(Omy19,Ssa08))	LORe	NA
Ens106s00016.150	A	Ssal	ENSSSAG00000002088	Ssa04	13196646	13226392	-	2	2	((Omy10,Ssa04),(Omy19,Ssa08))	LORe	((Omy10,Ssa04),(Omy19,Ssa08))	LORe	NA
Ens106s00016.150	B	Ssal	ENSSSAG00000076957	Ssa08	15070817	15100052	+	2	2	((Omy10,Ssa04),(Omy19,Ssa08))	LORe	((Omy10,Ssa04),(Omy19,Ssa08))	LORe	NA
Ens106s00016.164	A	Omyk	ENSOMYG00000025587	Omy16	11794686	11798402	-	2	2	((Omy16,Ssa19),(Omy20,Ssa28))	AORe	((Omy16,Ssa19),(Omy20,Ssa28))	AORe	NA
Ens106s00016.164	A	Ssal	ENSSSAG00000065033	Ssa19	47271941	47275539	-	2	2	((Omy16,Ssa19),(Omy20,Ssa28))	AORe	((Omy16,Ssa19),(Omy20,Ssa28))	AORe	NA
Ens106s00016.164	B	Omyk	ENSOMYG00000019372	Omy20	10875095	10881242	-	2	2	((Omy16,Ssa19),(Omy20,Ssa28))	AORe	((Omy16,Ssa19),(Omy20,Ssa28))	AORe	NA
Ens106s00016.164	B	Ssal	ENSSSAG00000103090	Ssa28	8848260	8859517	+	2	2	((Omy16,Ssa19),(Omy20,Ssa28))	AORe	((Omy16,Ssa19),(Omy20,Ssa28))	AORe	NA
Ens106s00016.190	A	Ssal	ENSSSAG00000068301	Ssa15	73163936	73167557	+	1	1	((Omy09,Ssa15),(Omy16,Ssa13))	NA	((Omy09,Ssa15),(Omy16,Ssa13))	AORe	FALSE
Ens106s00016.190	A	Omyk	ENSOMYG00000002256	Omy09	45771362	45775001	+	1	1	((Omy09,Ssa15),(Omy16,Ssa13))	NA	((Omy09,Ssa15),(Omy16,Ssa13))	AORe	FALSE
Ens106s00016.202	NA	Ssal	ENSSSAG00000068294	Ssa15	73156628	73182688	-	1	0	NA	NA	((Omy09,Ssa15),(Omy16,Ssa13))	AORe	NA
Ens106s00016.213	B	Omyk	ENSOMYG00000028947	Omy11	48675747	48681214	-	1	1	((Omy06,Ssa24),(Omy11,Ssa20))	NA	((Omy06,Ssa24),(Omy11,Ssa20))	AORe	FALSE
Ens106s00016.213	B	Ssal	ENSSSAG00000079409	Ssa20	16799415	16810294	-	1	1	((Omy06,Ssa24),(Omy11,Ssa20))	NA	((Omy06,Ssa24),(Omy11,Ssa20))	AORe	FALSE
Ens106s00016.221	B	Ssal	ENSSSAG00000042258	Ssa12	59721410	59725257	+	1	1	((Omy07,Ssa22),(Omy17,Ssa12))	NA	((Omy07,Ssa22),(Omy17,Ssa12))	AORe	FALSE
Ens106s00016.221	B	Omyk	ENSOMYG00000008184	Omy17	56108476	56112093	+	1	1	((Omy07,Ssa22),(Omy17,Ssa12))	NA	((Omy07,Ssa22),(Omy17,Ssa12))	AORe	FALSE
Ens106s00016.235	B	Ssal	ENSSSAG00000079442	Ssa23	22133498	22136412	+	1	1	((Omy05,Ssa10),(Omy30,Ssa23))	NA	((Omy05,Ssa10),(Omy30,Ssa23))	AORe	FALSE
Ens106s00016.235	B	Omyk	ENSOMYG00000000885	Omy30	27249911	27252640	-	1	1	((Omy05,Ssa10),(Omy30,Ssa23))	NA	((Omy05,Ssa10),(Omy30,Ssa23))	AORe	FALSE
Ens106s00016.258	NA	Ssal	ENSSSAG00000120768	Ssa12	92892858	92895576	+	2	2	NA	NA	((Omy07,Ssa22),(Omy17,Ssa12))	AORe	NA
Ens106s00016.258	NA	Omyk	ENSOMYG00000029112	Omy17	87512152	87515007	+	2	2	NA	NA	((Omy07,Ssa22),(Omy17,Ssa12))	AORe	NA
Ens106s00016.258	NA	Omyk	ENSOMYG00000060523	Omy17	87494095	87507491	-	2	2	NA	NA	((Omy07,Ssa22),(Omy17,Ssa12))	AORe	NA
Ens106s00016.258	NA	Ssal	ENSSSAG00000055016	Ssa12	92875271	92888500	-	2	2	NA	NA	((Omy07,Ssa22),(Omy17,Ssa12))	AORe	NA
Ens106s00016.141	NA	Ssal	ENSSSAG00000055002	Ssa12	92858290	92864453	-	1	0	NA	NA	((Omy07,Ssa22),(Omy17,Ssa12))	AORe	NA
Ens106s00017.74	NA	Ssal	ENSSSAG00000038765	Ssa19	23240115	23241110	-	2	0	NA	NA	((Omy11,Ssa19),(Omy15,Ssa29))	AORe	NA
Ens106s00017.74	NA	Ssal	ENSSSAG00000049216	Ssa13	20391778	20393353	+	2	0	NA	NA	((Omy09,Ssa15),(Omy16,Ssa13))	AORe	NA
Ens106s00018.12	NA	Omyk	ENSOMYG00000019594	Omy21	16263886	16284642	-	0	1	NA	NA	((Omy15,Ssa17),(Omy21,Ssa07))	LORe	NA
Ens106s00018.162	A	Ssal	ENSSSAG00000084831	Ssa17	69658068	69678322	+	2	1	((Omy15,Ssa17),(Omy21,Ssa07))	NA	((Omy15,Ssa17),(Omy21,Ssa07))	LORe	NA
Ens106s00018.162	B	Ssal	ENSSSAG00000062829	Ssa07	53276604	53303533	+	2	1	((Omy15,Ssa17),(Omy21,Ssa07))	NA	((Omy15,Ssa17),(Omy21,Ssa07))	LORe	NA
Ens106s00018.162	A	Omyk	ENSOMYG00000019586	Omy15	67386444	67407558	+	2	1	((Omy15,Ssa17),(Omy21,Ssa07))	NA	((Omy15,Ssa17),(Omy21,Ssa07))	LORe	NA
Ens106s00018.181	NA	Ssal	ENSSSAG00000086391	Ssa27	12832006	12846200	+	3	2	NA	NA	((Omy18,Ssa27),(Omy32,Ssa14))	AORe	NA
Ens106s00018.181	NA	Omyk	ENSOMYG00000059237	Omy18	42368329	42422797	+	3	2	NA	NA	((Omy18,Ssa27),(Omy32,Ssa14))	AORe	NA
Ens106s00018.181	NA	Ssal	ENSSSAG00000056465	Ssa27	12794137	12810813	+	3	2	NA	NA	((Omy18,Ssa27),(Omy32,Ssa14))	AORe	NA
Ens106s00018.181	NA	Omyk	ENSOMYG00000020408	Omy18	42440625	42452067	-	3	2	NA	NA	((Omy18,Ssa27),(Omy32,Ssa14))	AORe	NA
Ens106s00018.181	NA	Ssal	ENSSSAG00000088956	Ssa27	12860677	12870127	-	3	2	NA	NA	((Omy18,Ssa27),(Omy32,Ssa14))	AORe	NA
Ens106s00018.197	A	Omyk	ENSOMYG00000026580	Omy01	65680290	65697332	+	1	1	((Omy01,Ssa18),(Omy23,Ssa01))	NA	((Omy01,Ssa18),(Omy23,Ssa01))	AORe	FALSE
Ens106s00018.197	A	Ssal	ENSSSAG00000069181	Ssa18	11496544	11602883	+	1	1	((Omy01,Ssa18),(Omy23,Ssa01))	NA	((Omy01,Ssa18),(Omy23,Ssa01))	AORe	FALSE
Ens106s00018.206	B	Omyk	ENSOMYG00000011946	Omy13	35901104	35907873	+	2	2	((Omy12,Ssa03),(Omy13,Ssa06))	AORe	((Omy12,Ssa03),(Omy13,Ssa06))	AORe	NA
Ens106s00018.206	B	Ssal	ENSSSAG00000067923	Ssa06	42183596	42191356	-	2	2	((Omy12,Ssa03),(Omy13,Ssa06))	AORe	((Omy12,Ssa03),(Omy13,Ssa06))	AORe	NA
Ens106s00018.206	A	Ssal	ENSSSAG00000044232	Ssa03	59581933	59588914	+	2	2	((Omy12,Ssa03),(Omy13,Ssa06))	AORe	((Omy12,Ssa03),(Omy13,Ssa06))	AORe	NA
Ens106s00018.206	A	Omyk	ENSOMYG00000036626	Omy12	69198303	69240249	+	2	2	((Omy12,Ssa03),(Omy13,Ssa06))	AORe	((Omy12,Ssa03),(Omy13,Ssa06))	AORe	NA
Ens106s00018.230	A	Ssal	ENSSSAG00000095774	Ssa01	156078969	156098193	-	2	2	((Omy05,Ssa01),(OmyY,Ssa11))	AORe	((Omy05,Ssa01),(OmyY,Ssa11))	AORe	NA
Ens106s00018.230	A	Omyk	ENSOMYG00000037328	Omy05	16995757	17010097	+	2	2	((Omy05,Ssa01),(OmyY,Ssa11))	AORe	((Omy05,Ssa01),(OmyY,Ssa11))	AORe	NA
Ens106s00018.230	B	Omyk	ENSOMYG00000034302	OmyY	6599697	6620327	+	2	2	((Omy05,Ssa01),(OmyY,Ssa11))	AORe	((Omy05,Ssa01),(OmyY,Ssa11))	AORe	NA
Ens106s00018.230	B	Ssal	ENSSSAG00000098370	Ssa11	65036992	65058091	+	2	2	((Omy05,Ssa01),(OmyY,Ssa11))	AORe	((Omy05,Ssa01),(OmyY,Ssa11))	AORe	NA
Ens106s00018.248	A	Ssal	ENSSSAG00000106294	Ssa01	168392153	168411172	+	2	2	((Omy05,Ssa01),(Omy12,Ssa13))	(Omy05,((Omy12,Ssa13),Ssa01))	((Omy05,Ssa01),(Omy12,Ssa13))	AORe	NA
Ens106s00018.248	B	Omyk	ENSOMYG00000009995	Omy12	1719767	1738731	-	2	2	((Omy05,Ssa01),(Omy12,Ssa13))	(Omy05,((Omy12,Ssa13),Ssa01))	((Omy05,Ssa01),(Omy12,Ssa13))	LORe	NA
Ens106s00018.248	B	Ssal	ENSSSAG00000041294	Ssa13	107493415	107513814	+	2	2	((Omy05,Ssa01),(Omy12,Ssa13))	(Omy05,((Omy12,Ssa13),Ssa01))	((Omy05,Ssa01),(Omy12,Ssa13))	AORe	NA
Ens106s00018.248	A	Omyk	ENSOMYG00000030645	Omy05	5945469	5954191	-	2	2	((Omy05,Ssa01),(Omy12,Ssa13))	(Omy05,((Omy12,Ssa13),Ssa01))	((Omy05,Ssa01),(Omy12,Ssa13))	AORe	NA
Ens106s00018.265	B	Omyk	ENSOMYG00000030752	Omy11	49368094	49373530	-	2	2	((Omy06,Ssa24),(Omy11,Ssa20))	AORe	((Omy06,Ssa24),(Omy11,Ssa20))	AORe	NA
Ens106s00018.265	B	Ssal	ENSSSAG00000102494	Ssa20	17516838	17526001	-	2	2	((Omy06,Ssa24),(Omy11,Ssa20))	AORe	((Omy06,Ssa24),(Omy11,Ssa20))	AORe	NA
Ens106s00018.265	A	Ssal	ENSSSAG00000116898	Ssa24	27537711	27550978	+	2	2	((Omy06,Ssa24),(Omy11,Ssa20))	AORe	((Omy06,Ssa24),(Omy11,Ssa20))	AORe	NA
Ens106s00018.265	A	Omyk	ENSOMYG00000002210	Omy06	20570088	20583087	-	2	2	((Omy06,Ssa24),(Omy11,Ssa20))	AORe	((Omy06,Ssa24),(Omy11,Ssa20))	AORe	NA
Ens106s00018.284	A	Omyk	ENSOMYG00000004601	Omy05	9659812	9677491	+	1	1	((Omy05,Ssa01),(OmyY,Ssa11))	NA	((Omy05,Ssa01),(OmyY,Ssa11))	AORe	FALSE
Ens106s00018.284	A	Ssal	ENSSSAG00000073858	Ssa01	164651168	164666898	-	1	1	((Omy05,Ssa01),(OmyY,Ssa11))	NA	((Omy05,Ssa01),(OmyY,Ssa11))	AORe	FALSE
Ens106s00018.296	A	Ssal	ENSSSAG00000040074	Ssa16	28716802	28757209	+	2	2	((Omy01,Ssa16),(Omy02,Ssa10))	AORe	((Omy01,Ssa16),(Omy02,Ssa10))	AORe	NA
Ens106s00018.296	A	Omyk	ENSOMYG00000040310	Omy01	30373276	30400646	-	2	2	((Omy01,Ssa16),(Omy02,Ssa10))	AORe	((Omy01,Ssa16),(Omy02,Ssa10))	AORe	NA
Ens106s00018.296	B	Ssal	ENSSSAG00000074757	Ssa10	90134984	90149004	-	2	2	((Omy01,Ssa16),(Omy02,Ssa10))	AORe	((Omy01,Ssa16),(Omy02,Ssa10))	AORe	NA
Ens106s00018.296	B	Omyk	ENSOMYG00000026195	Omy02	72071209	72090679	-	2	2	((Omy01,Ssa16),(Omy02,Ssa10))	AORe	((Omy01,Ssa16),(Omy02,Ssa10))	AORe	NA
Ens106s00019.199	NA	Omyk	ENSOMYG00000000115	Omy02	96008913	96011175	+	0	1	NA	NA	((Omy01,Ssa16),(Omy02,Ssa10))	AORe	NA
Ens106s00019.205	B	Omyk	ENSOMYG00000036617	Omy25	45281937	45283451	-	1	1	((Omy19,Ssa01),(Omy25,Ssa09))	NA	((Omy19,Ssa01),(Omy25,Ssa09))	AORe	FALSE
Ens106s00019.205	B	Ssal	ENSSSAG00000063290	Ssa09	51053766	51055803	-	1	1	((Omy19,Ssa01),(Omy25,Ssa09))	NA	((Omy19,Ssa01),(Omy25,Ssa09))	AORe	FALSE
Ens106s00019.219	A	Omyk	ENSOMYG00000019500	Omy14	30906388	30908111	-	2	2	((Omy14,Ssa05),(Omy31,Ssa09))	AORe	((Omy14,Ssa05),(Omy31,Ssa09))	AORe	NA
Ens106s00019.219	A	Ssal	ENSSSAG00000070677	Ssa05	14097967	14099399	+	2	2	((Omy14,Ssa05),(Omy31,Ssa09))	AORe	((Omy14,Ssa05),(Omy31,Ssa09))	AORe	NA
Ens106s00019.219	B	Ssal	ENSSSAG00000044973	Ssa09	88285797	88287146	+	2	2	((Omy14,Ssa05),(Omy31,Ssa09))	AORe	((Omy14,Ssa05),(Omy31,Ssa09))	AORe	NA
Ens106s00019.219	B	Omyk	ENSOMYG00000019485	Omy31	12974349	12975698	+	2	2	((Omy14,Ssa05),(Omy31,Ssa09))	AORe	((Omy14,Ssa05),(Omy31,Ssa09))	AORe	NA
Ens106s00019.248	A	Ssal	ENSSSAG00000087399	Ssa25	1550519	1574073	+	2	2	((Omy03,Ssa25),(Omy22,Ssa21))	AORe	((Omy03,Ssa25),(Omy22,Ssa21))	AORe	NA
Ens106s00019.248	A	Omyk	ENSOMYG00000002661	Omy03	37753076	37754257	+	2	2	((Omy03,Ssa25),(Omy22,Ssa21))	AORe	((Omy03,Ssa25),(Omy22,Ssa21))	AORe	NA
Ens106s00019.248	B	Omyk	ENSOMYG00000032895	Omy22	2016871	2017971	-	2	2	((Omy03,Ssa25),(Omy22,Ssa21))	AORe	((Omy03,Ssa25),(Omy22,Ssa21))	AORe	NA
Ens106s00019.248	B	Ssal	ENSSSAG00000042700	Ssa21	2714359	2722891	-	2	2	((Omy03,Ssa25),(Omy22,Ssa21))	AORe	((Omy03,Ssa25),(Omy22,Ssa21))	AORe	NA
Ens106s00019.261	NA	Ssal	ENSSSAG00000085874	Ssa16	86272653	86286866	+	2	3	NA	NA	((Omy07,Ssa17),(Omy18,Ssa16))	LORe	NA
Ens106s00019.261	NA	Omyk	ENSOMYG00000008578	Omy18	6324223	6331623	-	2	3	NA	NA	((Omy07,Ssa17),(Omy18,Ssa16))	LORe	NA
Ens106s00019.261	NA	Omyk	ENSOMYG00000067837	Omy07	830163	841883	-	2	3	NA	NA	((Omy07,Ssa17),(Omy18,Ssa16))	LORe	NA
Ens106s00019.261	NA	Omyk	ENSOMYG00000002433	OmyJAAXML020000736.1	2412	12484	+	2	3	NA	NA	NA	NA	NA
Ens106s00019.261	NA	Ssal	ENSSSAG00000102450	Ssa17	34293303	34306712	+	2	3	NA	NA	((Omy07,Ssa17),(Omy18,Ssa16))	LORe	NA
Ens106s00019.277	B	Ssal	ENSSSAG00000009404	Ssa21	2816768	2821650	-	2	1	((Omy03,Ssa25),(Omy22,Ssa21))	NA	((Omy03,Ssa25),(Omy22,Ssa21))	AORe	NA
Ens106s00019.277	A	Ssal	ENSSSAG00000042706	Ssa25	1483495	1486246	+	2	1	((Omy03,Ssa25),(Omy22,Ssa21))	NA	((Omy03,Ssa25),(Omy22,Ssa21))	AORe	NA
Ens106s00019.277	A	Omyk	ENSOMYG00000002639	Omy03	37688512	37690420	+	2	1	((Omy03,Ssa25),(Omy22,Ssa21))	NA	((Omy03,Ssa25),(Omy22,Ssa21))	AORe	NA
Ens106s00019.289	NA	Omyk	ENSOMYG00000070253	Omy14	43123351	43128258	-	0	1	NA	NA	((Omy14,Ssa05),(Omy31,Ssa09))	AORe	NA
Ens106s00019.295	B	Omyk	ENSOMYG00000033584	Omy22	9400446	9410609	+	1	1	((Omy03,Ssa25),(Omy22,Ssa21))	NA	((Omy03,Ssa25),(Omy22,Ssa21))	AORe	FALSE
Ens106s00019.295	B	Ssal	ENSSSAG00000078567	Ssa21	22689070	22695392	-	1	1	((Omy03,Ssa25),(Omy22,Ssa21))	NA	((Omy03,Ssa25),(Omy22,Ssa21))	AORe	FALSE
Ens106s00019.307	A	Omyk	ENSOMYG00000017183	Omy11	17954837	17960012	+	1	1	((Omy11,Ssa19),(Omy15,Ssa29))	NA	((Omy11,Ssa19),(Omy15,Ssa29))	AORe	FALSE
Ens106s00019.307	A	Ssal	ENSSSAG00000073249	Ssa19	8989371	8996954	+	1	1	((Omy11,Ssa19),(Omy15,Ssa29))	NA	((Omy11,Ssa19),(Omy15,Ssa29))	AORe	FALSE
Ens106s00019.315	B	Omyk	ENSOMYG00000043221	Omy28	19206124	19207590	+	2	2	((Omy08,Ssa14),(Omy28,Ssa03))	AORe	((Omy08,Ssa14),(Omy28,Ssa03))	AORe	NA
Ens106s00019.315	B	Ssal	ENSSSAG00000110556	Ssa03	27021829	27028814	-	2	2	((Omy08,Ssa14),(Omy28,Ssa03))	AORe	((Omy08,Ssa14),(Omy28,Ssa03))	AORe	NA
Ens106s00019.315	A	Ssal	ENSSSAG00000100530	Ssa14	25577939	25594764	-	2	2	((Omy08,Ssa14),(Omy28,Ssa03))	AORe	((Omy08,Ssa14),(Omy28,Ssa03))	AORe	NA
Ens106s00019.315	A	Omyk	ENSOMYG00000015569	Omy08	65894124	65895247	-	2	2	((Omy08,Ssa14),(Omy28,Ssa03))	AORe	((Omy08,Ssa14),(Omy28,Ssa03))	AORe	NA
Ens106s00019.332	NA	Ssal	ENSSSAG00000118972	Ssa03	64597119	64600878	-	2	0	NA	NA	((Omy12,Ssa03),(Omy13,Ssa06))	AORe	NA
Ens106s00019.332	NA	Ssal	ENSSSAG00000116010	Ssa03	64591272	64593004	-	2	0	NA	NA	((Omy12,Ssa03),(Omy13,Ssa06))	AORe	NA
Ens106s00019.349	NA	Omyk	ENSOMYG00000072890	Omy08	78013399	78015741	-	0	1	NA	NA	((Omy08,Ssa14),(Omy28,Ssa03))	AORe	NA
Ens106s00019.190	NA	Omyk	ENSOMYG00000033973	Omy02	54523410	54524879	-	0	1	NA	NA	((Omy01,Ssa16),(Omy02,Ssa10))	AORe	NA
Ens106s00019.358	B	Omyk	ENSOMYG00000055383	Omy26	47830037	47831245	+	2	2	((Omy06,Ssa26),(Omy26,Ssa11))	AORe	((Omy06,Ssa26),(Omy26,Ssa11))	LORe	NA
Ens106s00019.358	A	Ssal	ENSSSAG00000117137	Ssa26	41613645	41615081	+	2	2	((Omy06,Ssa26),(Omy26,Ssa11))	AORe	((Omy06,Ssa26),(Omy26,Ssa11))	LORe	NA
Ens106s00019.358	A	Omyk	ENSOMYG00000001580	Omy06	87695699	87696907	+	2	2	((Omy06,Ssa26),(Omy26,Ssa11))	AORe	((Omy06,Ssa26),(Omy26,Ssa11))	LORe	NA
Ens106s00019.358	B	Ssal	ENSSSAG00000082053	Ssa11	40346157	40347593	+	2	2	((Omy06,Ssa26),(Omy26,Ssa11))	AORe	((Omy06,Ssa26),(Omy26,Ssa11))	LORe	NA
Ens106s00019.371	B	Ssal	ENSSSAG00000091284	Ssa11	41548111	41550206	-	2	2	((Omy06,Ssa26),(Omy26,Ssa11))	LORe	((Omy06,Ssa26),(Omy26,Ssa11))	LORe	NA
Ens106s00019.371	A	Ssal	ENSSSAG00000040397	Ssa26	42969832	42971967	-	2	2	((Omy06,Ssa26),(Omy26,Ssa11))	LORe	((Omy06,Ssa26),(Omy26,Ssa11))	LORe	NA
Ens106s00019.371	A	Omyk	ENSOMYG00000002685	Omy06	88816902	88818905	-	2	2	((Omy06,Ssa26),(Omy26,Ssa11))	LORe	((Omy06,Ssa26),(Omy26,Ssa11))	LORe	NA
Ens106s00019.371	B	Omyk	ENSOMYG00000064318	Omy26	48926963	48928275	-	2	2	((Omy06,Ssa26),(Omy26,Ssa11))	LORe	((Omy06,Ssa26),(Omy26,Ssa11))	LORe	NA
Ens106s00020.124	NA	Ssal	ENSSSAG00000068973	Ssa17	22758147	22761704	-	2	0	NA	NA	((Omy07,Ssa17),(Omy18,Ssa16))	LORe	NA
Ens106s00020.124	NA	Ssal	ENSSSAG00000079285	Ssa17	22716672	22720167	-	2	0	NA	NA	((Omy07,Ssa17),(Omy18,Ssa16))	LORe	NA
Ens106s00020.131	NA	Ssal	ENSSSAG00000120563	Ssa14	43213237	43299095	-	2	1	NA	NA	((Omy08,Ssa14),(Omy28,Ssa03))	AORe	NA
Ens106s00020.131	NA	Ssal	ENSSSAG00000082364	Ssa14	43102430	43109193	+	2	1	NA	NA	((Omy08,Ssa14),(Omy28,Ssa03))	AORe	NA
Ens106s00020.131	NA	Omyk	ENSOMYG00000028860	Omy08	82215566	82217693	-	2	1	NA	NA	((Omy08,Ssa14),(Omy28,Ssa03))	AORe	NA
Ens106s00020.142	A	Ssal	ENSSSAG00000113252	Ssa04	25573589	25588251	+	1	1	((Omy10,Ssa04),(Omy19,Ssa08))	NA	((Omy10,Ssa04),(Omy19,Ssa08))	AORe	FALSE
Ens106s00020.142	A	Omyk	ENSOMYG00000060091	Omy10	57508465	57919481	-	1	1	((Omy10,Ssa04),(Omy19,Ssa08))	NA	((Omy10,Ssa04),(Omy19,Ssa08))	AORe	FALSE
Ens106s00020.177	NA	Omyk	ENSOMYG00000014508	Omy09	15264437	15268648	-	0	1	NA	NA	((Omy09,Ssa18),(Omy21,Ssa07))	AORe	NA
Ens106s00020.181	NA	Ssal	ENSSSAG00000048909	Ssa07	25847392	25852906	+	11	5	NA	NA	((Omy09,Ssa18),(Omy21,Ssa07))	AORe	NA
Ens106s00020.181	NA	Ssal	ENSSSAG00000048854	Ssa07	26071084	26075974	-	11	5	NA	NA	((Omy09,Ssa18),(Omy21,Ssa07))	AORe	NA
Ens106s00020.181	NA	Ssal	ENSSSAG00000121113	Ssa07	25749316	25776384	-	11	5	NA	NA	((Omy09,Ssa18),(Omy21,Ssa07))	AORe	NA
Ens106s00020.181	NA	Ssal	ENSSSAG00000105370	Ssa07	26019525	26035193	-	11	5	NA	NA	((Omy09,Ssa18),(Omy21,Ssa07))	AORe	NA
Ens106s00020.181	NA	Omyk	ENSOMYG00000024440	Omy21	41368369	41370808	+	11	5	NA	NA	((Omy09,Ssa18),(Omy21,Ssa07))	AORe	NA
Ens106s00020.181	NA	Ssal	ENSSSAG00000095177	Ssa07	25816288	25836643	+	11	5	NA	NA	((Omy09,Ssa18),(Omy21,Ssa07))	AORe	NA
Ens106s00020.181	NA	Ssal	ENSSSAG00000048959	SsaCAJNNT020002089.1	1060	7592	-	11	5	NA	NA	NA	NA	NA
Ens106s00020.181	NA	Ssal	ENSSSAG00000092248	Ssa07	25805565	25809696	+	11	5	NA	NA	((Omy09,Ssa18),(Omy21,Ssa07))	AORe	NA
Ens106s00020.181	NA	Omyk	ENSOMYG00000024422	Omy21	41749810	41755361	+	11	5	NA	NA	((Omy09,Ssa18),(Omy21,Ssa07))	AORe	NA
Ens106s00020.181	NA	Ssal	ENSSSAG00000083115	Ssa07	25712885	25733882	-	11	5	NA	NA	((Omy09,Ssa18),(Omy21,Ssa07))	AORe	NA
Ens106s00020.181	NA	Omyk	ENSOMYG00000024372	Omy21	41692311	41702779	-	11	5	NA	NA	((Omy09,Ssa18),(Omy21,Ssa07))	AORe	NA
Ens106s00020.181	NA	Ssal	ENSSSAG00000055625	Ssa18	69755375	69772331	-	11	5	NA	NA	((Omy09,Ssa18),(Omy21,Ssa07))	AORe	NA
Ens106s00020.181	NA	Ssal	ENSSSAG00000040550	Ssa18	67521268	67547316	+	11	5	NA	NA	((Omy09,Ssa18),(Omy21,Ssa07))	AORe	NA
Ens106s00020.181	NA	Omyk	ENSOMYG00000013680	Omy09	17028713	17043670	-	11	5	NA	NA	((Omy09,Ssa18),(Omy21,Ssa07))	AORe	NA
Ens106s00020.181	NA	Omyk	ENSOMYG00000014540	Omy09	15253019	15262270	+	11	5	NA	NA	((Omy09,Ssa18),(Omy21,Ssa07))	AORe	NA
Ens106s00020.181	NA	Ssal	ENSSSAG00000043093	Ssa18	69994397	70015476	-	11	5	NA	NA	((Omy09,Ssa18),(Omy21,Ssa07))	AORe	NA
Ens106s00021.243	A	Ssal	ENSSSAG00000115483	Ssa17	62409770	62412522	-	2	1	((Omy15,Ssa17),(Omy21,Ssa07))	NA	((Omy15,Ssa17),(Omy21,Ssa07))	AORe	NA
Ens106s00021.243	B	Ssal	ENSSSAG00000118280	Ssa07	46694708	46703598	-	2	1	((Omy15,Ssa17),(Omy21,Ssa07))	NA	((Omy15,Ssa17),(Omy21,Ssa07))	AORe	NA
Ens106s00021.243	A	Omyk	ENSOMYG00000065753	Omy15	58675178	58676277	-	2	1	((Omy15,Ssa17),(Omy21,Ssa07))	NA	((Omy15,Ssa17),(Omy21,Ssa07))	AORe	NA
Ens106s00021.252	NA	Ssal	ENSSSAG00000089454	Ssa07	46726142	46728196	-	1	0	NA	NA	((Omy15,Ssa17),(Omy21,Ssa07))	AORe	NA
Ens106s00021.264	NA	Ssal	ENSSSAG00000042580	Ssa17	65744478	65745068	+	5	24	NA	NA	((Omy15,Ssa17),(Omy21,Ssa07))	cryptic	NA
Ens106s00021.264	NA	Omyk	ENSOMYG00000033444	Omy15	61861570	61862758	+	5	24	NA	NA	((Omy15,Ssa17),(Omy21,Ssa07))	cryptic	NA
Ens106s00021.264	NA	Ssal	ENSSSAG00000092724	Ssa07	46798084	46799426	-	5	24	NA	NA	((Omy15,Ssa17),(Omy21,Ssa07))	AORe	NA
Ens106s00021.264	NA	Omyk	ENSOMYG00000048477	Omy21	19484331	19485594	-	5	24	NA	NA	((Omy15,Ssa17),(Omy21,Ssa07))	AORe	NA
Ens106s00021.264	NA	Omyk	ENSOMYG00000058261	Omy21	19550203	19551481	-	5	24	NA	NA	((Omy15,Ssa17),(Omy21,Ssa07))	AORe	NA
Ens106s00021.264	NA	Omyk	ENSOMYG00000054048	Omy21	19515183	19516130	-	5	24	NA	NA	((Omy15,Ssa17),(Omy21,Ssa07))	AORe	NA
Ens106s00021.264	NA	Omyk	ENSOMYG00000061224	Omy21	19438886	19439688	-	5	24	NA	NA	((Omy15,Ssa17),(Omy21,Ssa07))	AORe	NA
Ens106s00021.264	NA	Omyk	ENSOMYG00000064455	Omy21	19705558	19706644	-	5	24	NA	NA	((Omy15,Ssa17),(Omy21,Ssa07))	cryptic	NA
Ens106s00021.264	NA	Ssal	ENSSSAG00000116510	Ssa17	65704785	65784025	+	5	24	NA	NA	((Omy15,Ssa17),(Omy21,Ssa07))	cryptic	NA
Ens106s00021.264	NA	Omyk	ENSOMYG00000062277	Omy15	61916557	61916981	+	5	24	NA	NA	((Omy15,Ssa17),(Omy21,Ssa07))	cryptic	NA
Ens106s00021.264	NA	Omyk	ENSOMYG00000033489	Omy15	61976492	62006720	+	5	24	NA	NA	((Omy15,Ssa17),(Omy21,Ssa07))	AORe	NA
Ens106s00021.264	NA	Omyk	ENSOMYG00000072490	Omy15	58689871	58690188	-	5	24	NA	NA	((Omy15,Ssa17),(Omy21,Ssa07))	AORe	NA
Ens106s00021.264	NA	Omyk	ENSOMYG00000065247	Omy15	58634536	58634853	-	5	24	NA	NA	((Omy15,Ssa17),(Omy21,Ssa07))	AORe	NA
Ens106s00021.264	NA	Ssal	ENSSSAG00000121446	Ssa17	65687133	65687681	+	5	24	NA	NA	((Omy15,Ssa17),(Omy21,Ssa07))	cryptic	NA
Ens106s00021.264	NA	Ssal	ENSSSAG00000042037	Ssa07	49916233	49917741	+	5	24	NA	NA	((Omy15,Ssa17),(Omy21,Ssa07))	AORe	NA
Ens106s00021.264	NA	Omyk	ENSOMYG00000057456	Omy21	19577303	19578613	-	5	24	NA	NA	((Omy15,Ssa17),(Omy21,Ssa07))	cryptic	NA
Ens106s00021.264	NA	Omyk	ENSOMYG00000055002	Omy21	19428013	19429325	-	5	24	NA	NA	((Omy15,Ssa17),(Omy21,Ssa07))	AORe	NA
Ens106s00021.264	NA	Omyk	ENSOMYG00000050110	Omy21	19495504	19496811	-	5	24	NA	NA	((Omy15,Ssa17),(Omy21,Ssa07))	AORe	NA
Ens106s00021.264	NA	Omyk	ENSOMYG00000049135	Omy21	19658141	19659461	-	5	24	NA	NA	((Omy15,Ssa17),(Omy21,Ssa07))	cryptic	NA
Ens106s00021.264	NA	Omyk	ENSOMYG00000008390	Omy21	19380044	19380594	-	5	24	NA	NA	((Omy15,Ssa17),(Omy21,Ssa07))	AORe	NA
Ens106s00021.264	NA	Omyk	ENSOMYG00000052764	Omy21	19604441	19605761	-	5	24	NA	NA	((Omy15,Ssa17),(Omy21,Ssa07))	cryptic	NA
Ens106s00021.264	NA	Omyk	ENSOMYG00000052668	Omy21	19451430	19452752	-	5	24	NA	NA	((Omy15,Ssa17),(Omy21,Ssa07))	AORe	NA
Ens106s00021.264	NA	Omyk	ENSOMYG00000060790	Omy21	19417633	19418896	-	5	24	NA	NA	((Omy15,Ssa17),(Omy21,Ssa07))	AORe	NA
Ens106s00021.264	NA	Omyk	ENSOMYG00000064131	Omy21	19400770	19402032	-	5	24	NA	NA	((Omy15,Ssa17),(Omy21,Ssa07))	AORe	NA
Ens106s00021.264	NA	Omyk	ENSOMYG00000064250	Omy21	19524601	19721496	-	5	24	NA	NA	((Omy15,Ssa17),(Omy21,Ssa07))	cryptic	NA
Ens106s00021.264	NA	Omyk	ENSOMYG00000073628	Omy21	19462628	19463658	-	5	24	NA	NA	((Omy15,Ssa17),(Omy21,Ssa07))	AORe	NA
Ens106s00021.264	NA	Omyk	ENSOMYG00000073314	Omy21	19697880	19698905	-	5	24	NA	NA	((Omy15,Ssa17),(Omy21,Ssa07))	cryptic	NA
Ens106s00021.264	NA	Omyk	ENSOMYG00000048940	Omy21	22720210	22720803	+	5	24	NA	NA	((Omy15,Ssa17),(Omy21,Ssa07))	AORe	NA
Ens106s00021.264	NA	Omyk	ENSOMYG00000015987	Omy21	22783092	22784173	+	5	24	NA	NA	((Omy15,Ssa17),(Omy21,Ssa07))	AORe	NA
Ens106s00021.339	NA	Omyk	ENSOMYG00000020708	Omy18	43013438	43014039	-	6	3	NA	NA	((Omy18,Ssa27),(Omy32,Ssa14))	AORe	NA
Ens106s00021.339	NA	Ssal	ENSSSAG00000093816	SsaCAJNNT020003966.1	18950	55831	+	6	3	NA	NA	NA	NA	NA
Ens106s00021.339	NA	Ssal	ENSSSAG00000091504	Ssa27	13388975	13417908	-	6	3	NA	NA	((Omy18,Ssa27),(Omy32,Ssa14))	AORe	NA
Ens106s00021.339	NA	Ssal	ENSSSAG00000099708	Ssa27	13411613	13412363	-	6	3	NA	NA	((Omy18,Ssa27),(Omy32,Ssa14))	AORe	NA
Ens106s00021.339	NA	Omyk	ENSOMYG00000069494	Omy18	42918515	42919235	-	6	3	NA	NA	((Omy18,Ssa27),(Omy32,Ssa14))	AORe	NA
Ens106s00021.339	NA	Omyk	ENSOMYG00000020682	Omy18	42895242	43024869	-	6	3	NA	NA	((Omy18,Ssa27),(Omy32,Ssa14))	AORe	NA
Ens106s00021.339	NA	Ssal	ENSSSAG00000112227	Ssa27	13468151	13482048	-	6	3	NA	NA	((Omy18,Ssa27),(Omy32,Ssa14))	AORe	NA
Ens106s00021.339	NA	Ssal	ENSSSAG00000102138	SsaCAJNNT020003966.1	7053	11197	+	6	3	NA	NA	NA	NA	NA
Ens106s00021.339	NA	Ssal	ENSSSAG00000004730	Ssa14	67608776	67623013	-	6	3	NA	NA	((Omy18,Ssa27),(Omy32,Ssa14))	AORe	NA
Ens106s00021.447	A	Ssal	ENSSSAG00000113740	Ssa17	19636762	19647103	-	2	0	((Omy07,Ssa17),(Omy18,Ssa16))	NA	((Omy07,Ssa17),(Omy18,Ssa16))	AORe	NA
Ens106s00021.447	B	Ssal	ENSSSAG00000120986	Ssa16	72926153	72927714	-	2	0	((Omy07,Ssa17),(Omy18,Ssa16))	NA	((Omy07,Ssa17),(Omy18,Ssa16))	AORe	NA
Ens106s00021.459	NA	Omyk	ENSOMYG00000020672	Omy07	15917725	15927120	+	0	1	NA	NA	((Omy07,Ssa17),(Omy18,Ssa16))	LORe	NA
Ens106s00022.194	B	Omyk	ENSOMYG00000027024	Omy08	30914969	30988974	-	2	2	((Omy04,Ssa06),(Omy08,Ssa15))	AORe	((Omy04,Ssa06),(Omy08,Ssa15))	AORe	NA
Ens106s00022.194	B	Ssal	ENSSSAG00000073978	Ssa15	48576260	48702253	-	2	2	((Omy04,Ssa06),(Omy08,Ssa15))	AORe	((Omy04,Ssa06),(Omy08,Ssa15))	AORe	NA
Ens106s00022.194	A	Omyk	ENSOMYG00000009705	Omy04	34931062	34969693	+	2	2	((Omy04,Ssa06),(Omy08,Ssa15))	AORe	((Omy04,Ssa06),(Omy08,Ssa15))	AORe	NA
Ens106s00022.194	A	Ssal	ENSSSAG00000023564	Ssa06	82250596	82300829	+	2	2	((Omy04,Ssa06),(Omy08,Ssa15))	AORe	((Omy04,Ssa06),(Omy08,Ssa15))	AORe	NA
Ens106s00022.207	B	Ssal	ENSSSAG00000094983	Ssa09	29111355	29158931	-	2	1	((Omy19,Ssa01),(Omy25,Ssa09))	NA	((Omy19,Ssa01),(Omy25,Ssa09))	AORe	NA
Ens106s00022.207	A	Omyk	ENSOMYG00000040722	Omy19	36136363	36193009	+	2	1	((Omy19,Ssa01),(Omy25,Ssa09))	NA	((Omy19,Ssa01),(Omy25,Ssa09))	AORe	NA
Ens106s00022.207	A	Ssal	ENSSSAG00000004430	Ssa01	34675143	34753235	-	2	1	((Omy19,Ssa01),(Omy25,Ssa09))	NA	((Omy19,Ssa01),(Omy25,Ssa09))	AORe	NA
Ens106s00022.226	B	Ssal	ENSSSAG00000078046	Ssa01	61163968	61329601	-	2	2	((Omy01,Ssa18),(Omy23,Ssa01))	AORe	((Omy01,Ssa18),(Omy23,Ssa01))	AORe	NA
Ens106s00022.226	B	Omyk	ENSOMYG00000040073	Omy23	21681466	21821954	-	2	2	((Omy01,Ssa18),(Omy23,Ssa01))	AORe	((Omy01,Ssa18),(Omy23,Ssa01))	AORe	NA
Ens106s00022.226	A	Omyk	ENSOMYG00000019490	Omy01	70866624	70961634	-	2	2	((Omy01,Ssa18),(Omy23,Ssa01))	AORe	((Omy01,Ssa18),(Omy23,Ssa01))	AORe	NA
Ens106s00022.226	A	Ssal	ENSSSAG00000074203	Ssa18	16968989	16979219	-	2	2	((Omy01,Ssa18),(Omy23,Ssa01))	AORe	((Omy01,Ssa18),(Omy23,Ssa01))	AORe	NA
Ens106s00022.241	A	Omyk	ENSOMYG00000035348	Omy13	16201702	16262463	-	2	2	((Omy13,Ssa02),(Omy17,Ssa12))	LORe	((Omy13,Ssa02),(Omy17,Ssa12))	AORe	NA
Ens106s00022.241	B	Omyk	ENSOMYG00000032700	Omy17	23964168	24031502	-	2	2	((Omy13,Ssa02),(Omy17,Ssa12))	LORe	((Omy13,Ssa02),(Omy17,Ssa12))	AORe	NA
Ens106s00022.241	B	Ssal	ENSSSAG00000006769	Ssa12	26153357	26229021	-	2	2	((Omy13,Ssa02),(Omy17,Ssa12))	LORe	((Omy13,Ssa02),(Omy17,Ssa12))	AORe	NA
Ens106s00022.241	A	Ssal	ENSSSAG00000077343	Ssa02	61009767	61076727	+	2	2	((Omy13,Ssa02),(Omy17,Ssa12))	LORe	((Omy13,Ssa02),(Omy17,Ssa12))	AORe	NA
Ens106s00022.260	A	Omyk	ENSOMYG00000005463	Omy14	27452647	27464794	+	1	1	((Omy14,Ssa05),(Omy31,Ssa09))	NA	((Omy14,Ssa05),(Omy31,Ssa09))	AORe	FALSE
Ens106s00022.260	A	Ssal	ENSSSAG00000001938	Ssa05	17749778	17769524	-	1	1	((Omy14,Ssa05),(Omy31,Ssa09))	NA	((Omy14,Ssa05),(Omy31,Ssa09))	AORe	FALSE
Ens106s00022.271	NA	Ssal	ENSSSAG00000083447	Ssa04	42247386	42278818	-	2	2	NA	NA	((Omy10,Ssa04),(OmyY,Ssa11))	AORe	NA
Ens106s00022.271	NA	Omyk	ENSOMYG00000012026	Omy10	44575566	44603886	+	2	2	NA	NA	((Omy10,Ssa04),(OmyY,Ssa11))	AORe	NA
Ens106s00022.271	NA	Omyk	ENSOMYG00000064918	OmyY	30265393	30290568	+	2	2	NA	NA	((Omy10,Ssa04),(OmyY,Ssa11))	AORe	NA
Ens106s00022.271	NA	Ssal	ENSSSAG00000112021	SsaCAJNNT020002610.1	67166	90787	-	2	2	NA	NA	NA	NA	NA
Ens106s00022.290	B	Omyk	ENSOMYG00000004910	Omy26	7002405	7038716	-	2	2	((Omy06,Ssa26),(Omy26,Ssa11))	LORe	((Omy06,Ssa26),(Omy26,Ssa11))	LORe	NA
Ens106s00022.290	A	Omyk	ENSOMYG00000004858	Omy06	92598802	92655891	-	2	2	((Omy06,Ssa26),(Omy26,Ssa11))	LORe	((Omy06,Ssa26),(Omy26,Ssa11))	LORe	NA
Ens106s00022.290	B	Ssal	ENSSSAG00000009849	Ssa11	46901756	47158317	-	2	2	((Omy06,Ssa26),(Omy26,Ssa11))	LORe	((Omy06,Ssa26),(Omy26,Ssa11))	LORe	NA
Ens106s00022.290	A	Ssal	ENSSSAG00000010183	Ssa26	47558478	47618846	-	2	2	((Omy06,Ssa26),(Omy26,Ssa11))	LORe	((Omy06,Ssa26),(Omy26,Ssa11))	LORe	NA
Ens106s00022.306	NA	Omyk	ENSOMYG00000048854	Omy02	102682619	102718283	+	0	1	NA	NA	((Omy02,Ssa10),(Omy30,Ssa23))	AORe	NA
Ens106s00022.321	B	Ssal	ENSSSAG00000002775	Ssa08	7311767	7345375	+	2	2	((Omy10,Ssa04),(Omy19,Ssa08))	AORe	((Omy10,Ssa04),(Omy19,Ssa08))	AORe	NA
Ens106s00022.321	B	Omyk	ENSOMYG00000017338	Omy19	17310543	17325455	-	2	2	((Omy10,Ssa04),(Omy19,Ssa08))	AORe	((Omy10,Ssa04),(Omy19,Ssa08))	cryptic	NA
Ens106s00022.321	A	Omyk	ENSOMYG00000020313	Omy10	61890141	61906948	+	2	2	((Omy10,Ssa04),(Omy19,Ssa08))	AORe	((Omy10,Ssa04),(Omy19,Ssa08))	AORe	NA
Ens106s00022.321	A	Ssal	ENSSSAG00000074653	Ssa04	20873038	20896016	-	2	2	((Omy10,Ssa04),(Omy19,Ssa08))	AORe	((Omy10,Ssa04),(Omy19,Ssa08))	AORe	NA
Ens106s00022.336	B	Omyk	ENSOMYG00000037200	Omy21	35806212	35979336	+	2	2	((Omy09,Ssa18),(Omy21,Ssa07))	AORe	((Omy09,Ssa18),(Omy21,Ssa07))	AORe	NA
Ens106s00022.336	B	Ssal	ENSSSAG00000067718	Ssa07	32057222	32262605	-	2	2	((Omy09,Ssa18),(Omy21,Ssa07))	AORe	((Omy09,Ssa18),(Omy21,Ssa07))	AORe	NA
Ens106s00022.336	A	Ssal	ENSSSAG00000041183	Ssa18	50199868	50388605	+	2	2	((Omy09,Ssa18),(Omy21,Ssa07))	AORe	((Omy09,Ssa18),(Omy21,Ssa07))	AORe	NA
Ens106s00022.336	A	Omyk	ENSOMYG00000011780	Omy09	32278374	32445574	-	2	2	((Omy09,Ssa18),(Omy21,Ssa07))	AORe	((Omy09,Ssa18),(Omy21,Ssa07))	AORe	NA
Ens106s00022.357	B	Ssal	ENSSSAG00000073682	Ssa11	32901126	32919440	-	2	2	((Omy06,Ssa26),(Omy26,Ssa11))	LORe	((Omy06,Ssa26),(Omy26,Ssa11))	LORe	NA
Ens106s00022.357	A	Ssal	ENSSSAG00000117875	Ssa26	33010596	33028093	-	2	2	((Omy06,Ssa26),(Omy26,Ssa11))	LORe	((Omy06,Ssa26),(Omy26,Ssa11))	LORe	NA
Ens106s00022.357	A	Omyk	ENSOMYG00000072662	Omy06	80432982	80468457	-	2	2	((Omy06,Ssa26),(Omy26,Ssa11))	LORe	((Omy06,Ssa26),(Omy26,Ssa11))	LORe	NA
Ens106s00022.357	B	Omyk	ENSOMYG00000057957	Omy26	40805542	40832177	-	2	2	((Omy06,Ssa26),(Omy26,Ssa11))	LORe	((Omy06,Ssa26),(Omy26,Ssa11))	LORe	NA
Ens106s00023.184	A	Ssal	ENSSSAG00000003962	Ssa04	57119365	57212521	+	2	2	((Omy10,Ssa04),(Omy12,Ssa13))	AORe	((Omy10,Ssa04),(Omy12,Ssa13))	AORe	NA
Ens106s00023.184	A	Omyk	ENSOMYG00000015627	Omy10	30266793	30289417	-	2	2	((Omy10,Ssa04),(Omy12,Ssa13))	AORe	((Omy10,Ssa04),(Omy12,Ssa13))	AORe	NA
Ens106s00023.184	B	Omyk	ENSOMYG00000024093	Omy12	34554180	34566237	+	2	2	((Omy10,Ssa04),(Omy12,Ssa13))	AORe	((Omy10,Ssa04),(Omy12,Ssa13))	AORe	NA
Ens106s00023.184	B	Ssal	ENSSSAG00000093669	Ssa13	77511342	77555399	-	2	2	((Omy10,Ssa04),(Omy12,Ssa13))	AORe	((Omy10,Ssa04),(Omy12,Ssa13))	AORe	NA
Ens106s00023.201	NA	Ssal	ENSSSAG00000104704	Ssa01	145376437	145399775	+	2	2	NA	NA	((Omy05,Ssa01),(OmyY,Ssa11))	AORe	NA
Ens106s00023.201	NA	Ssal	ENSSSAG00000108430	Ssa09	104228841	104256391	+	2	2	NA	NA	NA	NA	NA
Ens106s00023.201	NA	Omyk	ENSOMYG00000020182	Omy05	26593995	26624235	-	2	2	NA	NA	((Omy05,Ssa01),(OmyY,Ssa11))	AORe	NA
Ens106s00023.201	NA	Omyk	ENSOMYG00000043945	OmyY	17144730	17149713	-	2	2	NA	NA	((Omy05,Ssa01),(OmyY,Ssa11))	AORe	NA
Ens106s00023.220	B	Omyk	ENSOMYG00000041298	Omy11	51484480	51487541	-	0	2	((Omy06,Ssa24),(Omy11,Ssa20))	NA	((Omy06,Ssa24),(Omy11,Ssa20))	AORe	NA
Ens106s00023.220	A	Omyk	ENSOMYG00000012575	Omy06	22843648	22848598	-	0	2	((Omy06,Ssa24),(Omy11,Ssa20))	NA	((Omy06,Ssa24),(Omy11,Ssa20))	AORe	NA
Ens106s00023.240	A	Ssal	ENSSSAG00000099241	Ssa15	101588894	101594632	+	2	2	((Omy09,Ssa15),(Omy16,Ssa13))	AORe	((Omy09,Ssa15),(Omy16,Ssa13))	AORe	NA
Ens106s00023.240	A	Omyk	ENSOMYG00000071486	Omy09	71296352	71330148	+	2	2	((Omy09,Ssa15),(Omy16,Ssa13))	AORe	((Omy09,Ssa15),(Omy16,Ssa13))	AORe	NA
Ens106s00023.240	B	Omyk	ENSOMYG00000007974	Omy16	71647510	71653789	+	2	2	((Omy09,Ssa15),(Omy16,Ssa13))	AORe	((Omy09,Ssa15),(Omy16,Ssa13))	AORe	NA
Ens106s00023.240	B	Ssal	ENSSSAG00000046114	Ssa13	9943332	9948672	-	2	2	((Omy09,Ssa15),(Omy16,Ssa13))	AORe	((Omy09,Ssa15),(Omy16,Ssa13))	AORe	NA
Ens106s00023.253	B	Omyk	ENSOMYG00000057411	Omy17	84005065	84015923	+	1	2	((Omy07,Ssa22),(Omy17,Ssa12))	NA	((Omy07,Ssa22),(Omy17,Ssa12))	AORe	NA
Ens106s00023.253	A	Omyk	ENSOMYG00000027818	Omy07	38774332	38792491	-	1	2	((Omy07,Ssa22),(Omy17,Ssa12))	NA	((Omy07,Ssa22),(Omy17,Ssa12))	AORe	NA
Ens106s00023.253	A	Ssal	ENSSSAG00000118251	Ssa22	7143912	7222283	-	1	2	((Omy07,Ssa22),(Omy17,Ssa12))	NA	((Omy07,Ssa22),(Omy17,Ssa12))	AORe	NA
Ens106s00023.274	NA	Omyk	ENSOMYG00000032298	Omy07	40453422	40454578	-	3	3	NA	NA	((Omy07,Ssa22),(Omy17,Ssa12))	AORe	NA
Ens106s00023.274	NA	Ssal	ENSSSAG00000106632	Ssa22	8862408	8890610	-	3	3	NA	NA	((Omy07,Ssa22),(Omy17,Ssa12))	AORe	NA
Ens106s00023.274	NA	Omyk	ENSOMYG00000026697	Omy17	82206138	82207266	-	3	3	NA	NA	((Omy07,Ssa22),(Omy17,Ssa12))	AORe	NA
Ens106s00023.274	NA	Ssal	ENSSSAG00000077162	Ssa12	87480625	87487421	-	3	3	NA	NA	((Omy07,Ssa22),(Omy17,Ssa12))	AORe	NA
Ens106s00023.274	NA	Ssal	ENSSSAG00000113453	Ssa12	87492264	87495857	+	3	3	NA	NA	((Omy07,Ssa22),(Omy17,Ssa12))	AORe	NA
Ens106s00023.274	NA	Omyk	ENSOMYG00000026732	Omy17	82226626	82232860	+	3	3	NA	NA	((Omy07,Ssa22),(Omy17,Ssa12))	AORe	NA
Ens106s00023.296	A	Omyk	ENSOMYG00000032302	Omy07	40473759	40478693	+	2	1	((Omy07,Ssa22),(Omy17,Ssa12))	NA	((Omy07,Ssa22),(Omy17,Ssa12))	AORe	NA
Ens106s00023.296	A	Ssal	ENSSSAG00000117259	Ssa22	8909726	8915457	+	2	1	((Omy07,Ssa22),(Omy17,Ssa12))	NA	((Omy07,Ssa22),(Omy17,Ssa12))	AORe	NA
Ens106s00023.296	B	Ssal	ENSSSAG00000070711	Ssa12	87466946	87473687	-	2	1	((Omy07,Ssa22),(Omy17,Ssa12))	NA	((Omy07,Ssa22),(Omy17,Ssa12))	AORe	NA
Ens106s00023.314	B	Ssal	ENSSSAG00000076639	Ssa16	76721850	76727886	-	2	2	((Omy07,Ssa17),(Omy18,Ssa16))	AORe	((Omy07,Ssa17),(Omy18,Ssa16))	LORe	NA
Ens106s00023.314	B	Omyk	ENSOMYG00000064039	Omy18	14779435	14780502	+	2	2	((Omy07,Ssa17),(Omy18,Ssa16))	AORe	((Omy07,Ssa17),(Omy18,Ssa16))	LORe	NA
Ens106s00023.314	A	Omyk	ENSOMYG00000007362	Omy07	11762980	11764053	+	2	2	((Omy07,Ssa17),(Omy18,Ssa16))	AORe	((Omy07,Ssa17),(Omy18,Ssa16))	LORe	NA
Ens106s00023.314	A	Ssal	ENSSSAG00000076559	Ssa17	24450652	24458521	-	2	2	((Omy07,Ssa17),(Omy18,Ssa16))	AORe	((Omy07,Ssa17),(Omy18,Ssa16))	LORe	NA
Ens106s00023.329	A	Ssal	ENSSSAG00000052881	Ssa06	69331064	69332976	-	1	1	((Omy04,Ssa06),(Omy08,Ssa15))	NA	((Omy04,Ssa06),(Omy08,Ssa15))	AORe	FALSE
Ens106s00023.329	A	Omyk	ENSOMYG00000024267	Omy04	23497655	23498740	-	1	1	((Omy04,Ssa06),(Omy08,Ssa15))	NA	((Omy04,Ssa06),(Omy08,Ssa15))	AORe	FALSE
Ens106s00023.337	B	Omyk	ENSOMYG00000065975	Omy25	40904604	40917141	-	1	1	((Omy19,Ssa01),(Omy25,Ssa09))	NA	((Omy19,Ssa01),(Omy25,Ssa09))	AORe	FALSE
Ens106s00023.337	B	Ssal	ENSSSAG00000095109	Ssa09	44960561	45000927	-	1	1	((Omy19,Ssa01),(Omy25,Ssa09))	NA	((Omy19,Ssa01),(Omy25,Ssa09))	AORe	FALSE
Ens106s00024.181	B	Ssal	ENSSSAG00000075483	Ssa23	3167715	3183942	-	1	1	((Omy12,Ssa03),(Omy30,Ssa23))	NA	((Omy12,Ssa03),(Omy30,Ssa23))	AORe	TRUE
Ens106s00024.181	A	Omyk	ENSOMYG00000020543	Omy12	62066453	62073026	-	1	1	((Omy12,Ssa03),(Omy30,Ssa23))	NA	((Omy12,Ssa03),(Omy30,Ssa23))	AORe	TRUE
Ens106s00024.193	A	Ssal	ENSSSAG00000043069	Ssa19	64874319	64989069	-	1	1	((Omy16,Ssa19),(Omy20,Ssa28))	NA	NA	NA	NA
Ens106s00024.193	A	Omyk	ENSOMYG00000045460	Omy16	28082978	28103286	-	1	1	((Omy16,Ssa19),(Omy20,Ssa28))	NA	NA	NA	NA
Ens106s00024.210	B	Omyk	ENSOMYG00000013216	Omy12	45593552	45643515	-	1	2	((Omy10,Ssa04),(Omy12,Ssa13))	NA	((Omy10,Ssa04),(Omy12,Ssa13))	AORe	NA
Ens106s00024.210	B	Ssal	ENSSSAG00000087040	Ssa13	65316355	65371345	+	1	2	((Omy10,Ssa04),(Omy12,Ssa13))	NA	((Omy10,Ssa04),(Omy12,Ssa13))	AORe	NA
Ens106s00024.210	A	Omyk	ENSOMYG00000034858	Omy10	19751129	19789990	+	1	2	((Omy10,Ssa04),(Omy12,Ssa13))	NA	((Omy10,Ssa04),(Omy12,Ssa13))	AORe	NA
Ens106s00024.224	A	Omyk	ENSOMYG00000030535	Omy24	7428857	7431962	+	1	2	((Omy24,Ssa09),(Omy27,Ssa20))	NA	((Omy24,Ssa09),(Omy27,Ssa20))	AORe	NA
Ens106s00024.224	B	Ssal	ENSSSAG00000109888	Ssa20	52438453	52442870	+	1	2	((Omy24,Ssa09),(Omy27,Ssa20))	NA	((Omy24,Ssa09),(Omy27,Ssa20))	AORe	NA
Ens106s00024.224	B	Omyk	ENSOMYG00000044967	Omy27	10146415	10150655	+	1	2	((Omy24,Ssa09),(Omy27,Ssa20))	NA	((Omy24,Ssa09),(Omy27,Ssa20))	AORe	NA
Ens106s00024.243	A	Ssal	ENSSSAG00000069513	Ssa09	128787640	128810624	+	2	2	((Omy24,Ssa09),(Omy27,Ssa20))	AORe	((Omy24,Ssa09),(Omy27,Ssa20))	AORe	NA
Ens106s00024.243	A	Omyk	ENSOMYG00000022533	Omy24	16596938	16618571	+	2	2	((Omy24,Ssa09),(Omy27,Ssa20))	AORe	((Omy24,Ssa09),(Omy27,Ssa20))	AORe	NA
Ens106s00024.243	B	Ssal	ENSSSAG00000058182	Ssa20	62440126	62490143	+	2	2	((Omy24,Ssa09),(Omy27,Ssa20))	AORe	((Omy24,Ssa09),(Omy27,Ssa20))	AORe	NA
Ens106s00024.243	B	Omyk	ENSOMYG00000022539	Omy27	19349213	19382969	+	2	2	((Omy24,Ssa09),(Omy27,Ssa20))	AORe	((Omy24,Ssa09),(Omy27,Ssa20))	AORe	NA
Ens106s00024.265	B	Omyk	ENSOMYG00000039827	Omy27	20914113	20922034	-	2	2	((Omy24,Ssa09),(Omy27,Ssa20))	AORe	((Omy24,Ssa09),(Omy27,Ssa20))	AORe	NA
Ens106s00024.265	B	Ssal	ENSSSAG00000117273	Ssa20	64082088	64092422	-	2	2	((Omy24,Ssa09),(Omy27,Ssa20))	AORe	((Omy24,Ssa09),(Omy27,Ssa20))	AORe	NA
Ens106s00024.265	A	Omyk	ENSOMYG00000015202	Omy24	18076643	18081024	-	2	2	((Omy24,Ssa09),(Omy27,Ssa20))	AORe	((Omy24,Ssa09),(Omy27,Ssa20))	AORe	NA
Ens106s00024.265	A	Ssal	ENSSSAG00000109715	Ssa09	130261414	130435882	-	2	2	((Omy24,Ssa09),(Omy27,Ssa20))	AORe	((Omy24,Ssa09),(Omy27,Ssa20))	AORe	NA
Ens106s00024.283	A	Omyk	ENSOMYG00000027593	Omy12	76832042	76844664	-	1	2	((Omy12,Ssa03),(Omy13,Ssa06))	NA	((Omy12,Ssa03),(Omy13,Ssa06))	AORe	NA
Ens106s00024.283	B	Omyk	ENSOMYG00000064399	Omy13	44075713	44085399	-	1	2	((Omy12,Ssa03),(Omy13,Ssa06))	NA	((Omy12,Ssa03),(Omy13,Ssa06))	AORe	NA
Ens106s00024.283	B	Ssal	ENSSSAG00000041752	Ssa06	34197296	34228197	+	1	2	((Omy12,Ssa03),(Omy13,Ssa06))	NA	((Omy12,Ssa03),(Omy13,Ssa06))	AORe	NA
Ens106s00024.294	NA	Omyk	ENSOMYG00000019212	Omy11	22726939	22734496	+	4	4	NA	NA	((Omy11,Ssa19),(Omy15,Ssa29))	AORe	NA
Ens106s00024.294	NA	Ssal	ENSSSAG00000098226	Ssa19	13889682	13912486	+	4	4	NA	NA	((Omy11,Ssa19),(Omy15,Ssa29))	AORe	NA
Ens106s00024.294	NA	Ssal	ENSSSAG00000121092	Ssa29	35600147	35612464	+	4	4	NA	NA	((Omy11,Ssa19),(Omy15,Ssa29))	AORe	NA
Ens106s00024.294	NA	Omyk	ENSOMYG00000075015	Omy15	6968087	6997002	-	4	4	NA	NA	((Omy11,Ssa19),(Omy15,Ssa29))	AORe	NA
Ens106s00024.294	NA	Omyk	ENSOMYG00000043203	Omy28	28081851	28082900	+	4	4	NA	NA	((Omy08,Ssa14),(Omy28,Ssa03))	AORe	NA
Ens106s00024.294	NA	Ssal	ENSSSAG00000015876	Ssa03	17675511	17680372	-	4	4	NA	NA	((Omy08,Ssa14),(Omy28,Ssa03))	AORe	NA
Ens106s00024.294	NA	Omyk	ENSOMYG00000016977	Omy08	56374643	56386556	-	4	4	NA	NA	((Omy08,Ssa14),(Omy28,Ssa03))	AORe	NA
Ens106s00024.294	NA	Ssal	ENSSSAG00000084055	Ssa14	15466571	15506228	-	4	4	NA	NA	((Omy08,Ssa14),(Omy28,Ssa03))	AORe	NA
Ens106s00024.332	A	Omyk	ENSOMYG00000005253	Omy19	48794855	48800673	-	1	2	((Omy19,Ssa01),(Omy25,Ssa09))	NA	((Omy19,Ssa01),(Omy25,Ssa09))	AORe	NA
Ens106s00024.332	A	Ssal	ENSSSAG00000121632	Ssa01	21095020	21109263	+	1	2	((Omy19,Ssa01),(Omy25,Ssa09))	NA	((Omy19,Ssa01),(Omy25,Ssa09))	AORe	NA
Ens106s00024.332	B	Omyk	ENSOMYG00000035306	Omy25	14423170	14424566	+	1	2	((Omy19,Ssa01),(Omy25,Ssa09))	NA	((Omy19,Ssa01),(Omy25,Ssa09))	AORe	NA
Ens106s00025.293	A	Omyk	ENSOMYG00000014098	Omy03	67147881	67151484	+	1	1	((Omy03,Ssa25),(Omy22,Ssa21))	NA	((Omy03,Ssa25),(Omy22,Ssa21))	AORe	FALSE
Ens106s00025.293	A	Ssal	ENSSSAG00000054838	Ssa25	33248357	33253234	+	1	1	((Omy03,Ssa25),(Omy22,Ssa21))	NA	((Omy03,Ssa25),(Omy22,Ssa21))	AORe	FALSE
Ens106s00025.299	NA	Ssal	ENSSSAG00000080809	Ssa14	39288501	39290296	+	3	3	NA	NA	((Omy08,Ssa14),(Omy28,Ssa03))	AORe	NA
Ens106s00025.299	NA	Omyk	ENSOMYG00000025872	Omy08	78956608	78958894	+	3	3	NA	NA	((Omy08,Ssa14),(Omy28,Ssa03))	AORe	NA
Ens106s00025.299	NA	Ssal	ENSSSAG00000080695	Ssa14	39242573	39247872	-	3	3	NA	NA	((Omy08,Ssa14),(Omy28,Ssa03))	AORe	NA
Ens106s00025.299	NA	Ssal	ENSSSAG00000119558	Ssa14	39225342	39231272	-	3	3	NA	NA	((Omy08,Ssa14),(Omy28,Ssa03))	AORe	NA
Ens106s00025.299	NA	Omyk	ENSOMYG00000065367	Omy08	78904348	78907200	-	3	3	NA	NA	((Omy08,Ssa14),(Omy28,Ssa03))	AORe	NA
Ens106s00025.299	NA	Omyk	ENSOMYG00000025581	Omy08	78904463	78921609	-	3	3	NA	NA	((Omy08,Ssa14),(Omy28,Ssa03))	AORe	NA
Ens106s00025.315	NA	Ssal	ENSSSAG00000109672	Ssa23	39181039	39184353	-	5	3	NA	NA	((Omy02,Ssa10),(Omy30,Ssa23))	AORe	NA
Ens106s00025.315	NA	Ssal	ENSSSAG00000091276	Ssa23	39146472	39149545	-	5	3	NA	NA	((Omy02,Ssa10),(Omy30,Ssa23))	AORe	NA
Ens106s00025.315	NA	Ssal	ENSSSAG00000085962	Ssa23	39164742	39167165	-	5	3	NA	NA	((Omy02,Ssa10),(Omy30,Ssa23))	AORe	NA
Ens106s00025.315	NA	Ssal	ENSSSAG00000114453	Ssa23	39133664	39136979	-	5	3	NA	NA	((Omy02,Ssa10),(Omy30,Ssa23))	AORe	NA
Ens106s00025.315	NA	Omyk	ENSOMYG00000040736	Omy30	11408921	11423287	+	5	3	NA	NA	((Omy02,Ssa10),(Omy30,Ssa23))	AORe	NA
Ens106s00025.315	NA	Omyk	ENSOMYG00000040682	Omy30	11329161	11332149	-	5	3	NA	NA	((Omy02,Ssa10),(Omy30,Ssa23))	AORe	NA
Ens106s00025.315	NA	Omyk	ENSOMYG00000060347	Omy30	11342098	11345019	-	5	3	NA	NA	((Omy02,Ssa10),(Omy30,Ssa23))	AORe	NA
Ens106s00025.315	NA	Ssal	ENSSSAG00000101035	Ssa23	39254975	39257444	+	5	3	NA	NA	((Omy02,Ssa10),(Omy30,Ssa23))	AORe	NA
Ens106s00025.338	NA	Omyk	ENSOMYG00000032085	Omy02	76532095	76537667	+	2	1	NA	NA	NA	NA	NA
Ens106s00025.338	NA	Ssal	ENSSSAG00000099728	Ssa10	94858497	94901315	+	2	1	NA	NA	NA	NA	NA
Ens106s00025.338	NA	Ssal	ENSSSAG00000071565	Ssa17	3339550	3345998	-	2	1	NA	NA	NA	NA	NA
Ens106s00025.345	B	Omyk	ENSOMYG00000030612	Omy30	9113385	9116331	+	1	1	((Omy02,Ssa10),(Omy30,Ssa23))	NA	((Omy02,Ssa10),(Omy30,Ssa23))	AORe	FALSE
Ens106s00025.345	B	Ssal	ENSSSAG00000043738	Ssa23	41715333	41718547	-	1	1	((Omy02,Ssa10),(Omy30,Ssa23))	NA	((Omy02,Ssa10),(Omy30,Ssa23))	AORe	FALSE
Ens106s00025.357	NA	Omyk	ENSOMYG00000034953	Omy18	28476152	28480509	+	0	1	NA	NA	((Omy07,Ssa17),(Omy18,Ssa16))	AORe	NA
Ens106s00025.375	B	Ssal	ENSSSAG00000047190	Ssa02	26710103	26713654	+	1	1	((Omy02,Ssa05),(Omy03,Ssa02))	NA	((Omy02,Ssa05),(Omy03,Ssa02))	AORe	FALSE
Ens106s00025.375	B	Omyk	ENSOMYG00000001504	Omy03	15791929	15795468	+	1	1	((Omy02,Ssa05),(Omy03,Ssa02))	NA	((Omy02,Ssa05),(Omy03,Ssa02))	AORe	FALSE
Ens106s00025.387	B	Ssal	ENSSSAG00000067914	Ssa02	37848800	37868112	+	1	1	((Omy02,Ssa05),(Omy03,Ssa02))	NA	((Omy02,Ssa05),(Omy03,Ssa02))	AORe	FALSE
Ens106s00025.387	B	Omyk	ENSOMYG00000060464	Omy03	26605261	26608014	+	1	1	((Omy02,Ssa05),(Omy03,Ssa02))	NA	((Omy02,Ssa05),(Omy03,Ssa02))	AORe	FALSE
Ens106s00025.395	NA	Ssal	ENSSSAG00000073611	Ssa12	25356644	25360619	+	2	3	NA	NA	((Omy13,Ssa02),(Omy17,Ssa12))	LORe	NA
Ens106s00025.395	NA	Ssal	ENSSSAG00000079310	Ssa02	61817248	61820888	-	2	3	NA	NA	((Omy13,Ssa02),(Omy17,Ssa12))	LORe	NA
Ens106s00025.395	NA	Omyk	ENSOMYG00000027700	Omy13	15391459	15406551	+	2	3	NA	NA	((Omy13,Ssa02),(Omy17,Ssa12))	LORe	NA
Ens106s00025.395	NA	Omyk	ENSOMYG00000061831	Omy13	15402756	15407130	+	2	3	NA	NA	((Omy13,Ssa02),(Omy17,Ssa12))	LORe	NA
Ens106s00025.395	NA	Omyk	ENSOMYG00000013792	Omy17	23081476	23085809	+	2	3	NA	NA	((Omy13,Ssa02),(Omy17,Ssa12))	LORe	NA
Ens106s00025.415	A	Ssal	ENSSSAG00000116517	Ssa01	24332250	24339219	+	1	1	((Omy19,Ssa01),(Omy25,Ssa09))	NA	((Omy19,Ssa01),(Omy25,Ssa09))	AORe	FALSE
Ens106s00025.415	A	Omyk	ENSOMYG00000031034	Omy19	45868245	45871357	-	1	1	((Omy19,Ssa01),(Omy25,Ssa09))	NA	((Omy19,Ssa01),(Omy25,Ssa09))	AORe	FALSE
Ens106s00025.428	NA	Ssal	ENSSSAG00000098828	Ssa14	34980700	34983403	-	6	8	NA	NA	((Omy08,Ssa14),(Omy28,Ssa03))	AORe	NA
Ens106s00025.428	NA	Ssal	ENSSSAG00000020693	Ssa14	34945914	34948101	-	6	8	NA	NA	((Omy08,Ssa14),(Omy28,Ssa03))	AORe	NA
Ens106s00025.428	NA	Ssal	ENSSSAG00000097451	Ssa14	34992479	34995177	-	6	8	NA	NA	((Omy08,Ssa14),(Omy28,Ssa03))	AORe	NA
Ens106s00025.428	NA	Ssal	ENSSSAG00000104954	Ssa14	34968937	34971641	-	6	8	NA	NA	((Omy08,Ssa14),(Omy28,Ssa03))	AORe	NA
Ens106s00025.428	NA	Ssal	ENSSSAG00000113336	Ssa14	34957164	34959870	-	6	8	NA	NA	((Omy08,Ssa14),(Omy28,Ssa03))	AORe	NA
Ens106s00025.428	NA	Ssal	ENSSSAG00000022880	Ssa14	35004753	35006934	-	6	8	NA	NA	((Omy08,Ssa14),(Omy28,Ssa03))	AORe	NA
Ens106s00025.428	NA	Omyk	ENSOMYG00000017300	Omy12	61394433	61396012	-	6	8	NA	NA	((Omy12,Ssa03),(Omy30,Ssa23))	AORe	NA
Ens106s00025.428	NA	Omyk	ENSOMYG00000018293	Omy17	28387018	28397148	-	6	8	NA	NA	((Omy13,Ssa02),(Omy17,Ssa12))	AORe	NA
Ens106s00025.428	NA	Omyk	ENSOMYG00000051100	Omy08	74994666	74997209	-	6	8	NA	NA	((Omy08,Ssa14),(Omy28,Ssa03))	AORe	NA
Ens106s00025.428	NA	Omyk	ENSOMYG00000075781	Omy08	74977283	74988473	-	6	8	NA	NA	((Omy08,Ssa14),(Omy28,Ssa03))	AORe	NA
Ens106s00025.428	NA	Omyk	ENSOMYG00000054284	Omy08	75011703	75014388	-	6	8	NA	NA	((Omy08,Ssa14),(Omy28,Ssa03))	AORe	NA
Ens106s00025.428	NA	Omyk	ENSOMYG00000024287	Omy08	75028951	75032127	-	6	8	NA	NA	((Omy08,Ssa14),(Omy28,Ssa03))	AORe	NA
Ens106s00025.428	NA	Omyk	ENSOMYG00000063721	Omy08	75003036	75005721	-	6	8	NA	NA	((Omy08,Ssa14),(Omy28,Ssa03))	AORe	NA
Ens106s00025.428	NA	Omyk	ENSOMYG00000051921	Omy08	75020215	75022901	-	6	8	NA	NA	((Omy08,Ssa14),(Omy28,Ssa03))	AORe	NA
Ens106s00025.471	NA	Ssal	ENSSSAG00000067805	Ssa03	36863662	36865841	-	1	0	NA	NA	((Omy08,Ssa14),(Omy28,Ssa03))	AORe	NA
Ens106s00025.482	B	Ssal	ENSSSAG00000116730	Ssa03	16337534	16343491	+	1	1	((Omy08,Ssa14),(Omy28,Ssa03))	NA	((Omy08,Ssa14),(Omy28,Ssa03))	AORe	FALSE
Ens106s00025.482	B	Omyk	ENSOMYG00000046127	Omy28	29195300	29199121	-	1	1	((Omy08,Ssa14),(Omy28,Ssa03))	NA	((Omy08,Ssa14),(Omy28,Ssa03))	AORe	FALSE
Ens106s00025.496	NA	Omyk	ENSOMYG00000066377	Omy32	26074726	26078813	+	12	7	NA	NA	((Omy18,Ssa27),(Omy32,Ssa14))	AORe	NA
Ens106s00025.496	NA	Omyk	ENSOMYG00000058173	Omy32	26047492	26052248	+	12	7	NA	NA	((Omy18,Ssa27),(Omy32,Ssa14))	AORe	NA
Ens106s00025.496	NA	Omyk	ENSOMYG00000075837	Omy32	26065648	26069760	+	12	7	NA	NA	((Omy18,Ssa27),(Omy32,Ssa14))	AORe	NA
Ens106s00025.496	NA	Omyk	ENSOMYG00000066959	Omy32	26056565	26060677	+	12	7	NA	NA	((Omy18,Ssa27),(Omy32,Ssa14))	AORe	NA
Ens106s00025.496	NA	Omyk	ENSOMYG00000037019	Omy07	58406416	58411272	+	12	7	NA	NA	((Omy07,Ssa22),(Omy17,Ssa12))	AORe	NA
Ens106s00025.496	NA	Omyk	ENSOMYG00000001656	Omy08	57175855	57181013	-	12	7	NA	NA	((Omy08,Ssa14),(Omy28,Ssa03))	AORe	NA
Ens106s00025.496	NA	Ssal	ENSSSAG00000092082	SsaCAJNNT020003362.1	5116	9756	+	12	7	NA	NA	NA	NA	NA
Ens106s00025.496	NA	Ssal	ENSSSAG00000092328	Ssa14	72843766	72846588	-	12	7	NA	NA	((Omy18,Ssa27),(Omy32,Ssa14))	AORe	NA
Ens106s00025.496	NA	Ssal	ENSSSAG00000100700	Ssa14	72853323	72856153	-	12	7	NA	NA	((Omy18,Ssa27),(Omy32,Ssa14))	AORe	NA
Ens106s00025.496	NA	Ssal	ENSSSAG00000090997	Ssa14	72771333	72774376	-	12	7	NA	NA	((Omy18,Ssa27),(Omy32,Ssa14))	AORe	NA
Ens106s00025.496	NA	Ssal	ENSSSAG00000089542	Ssa14	72786189	72789240	-	12	7	NA	NA	((Omy18,Ssa27),(Omy32,Ssa14))	AORe	NA
Ens106s00025.496	NA	Ssal	ENSSSAG00000101153	Ssa14	72833968	72837027	-	12	7	NA	NA	((Omy18,Ssa27),(Omy32,Ssa14))	AORe	NA
Ens106s00025.496	NA	Ssal	ENSSSAG00000108872	Ssa14	72795733	72798793	-	12	7	NA	NA	((Omy18,Ssa27),(Omy32,Ssa14))	AORe	NA
Ens106s00025.496	NA	Ssal	ENSSSAG00000085100	Ssa14	72805353	72808355	-	12	7	NA	NA	((Omy18,Ssa27),(Omy32,Ssa14))	AORe	NA
Ens106s00025.496	NA	Ssal	ENSSSAG00000119793	Ssa14	72824619	72828309	-	12	7	NA	NA	((Omy18,Ssa27),(Omy32,Ssa14))	AORe	NA
Ens106s00025.496	NA	Ssal	ENSSSAG00000101903	Ssa14	72814830	72818907	-	12	7	NA	NA	((Omy18,Ssa27),(Omy32,Ssa14))	AORe	NA
Ens106s00025.496	NA	Ssal	ENSSSAG00000046232	Ssa27	18978739	18987237	-	12	7	NA	NA	((Omy18,Ssa27),(Omy32,Ssa14))	AORe	NA
Ens106s00025.496	NA	Omyk	ENSOMYG00000025612	Omy08	29461847	29465598	-	12	7	NA	NA	((Omy04,Ssa06),(Omy08,Ssa15))	AORe	NA
Ens106s00025.496	NA	Ssal	ENSSSAG00000067280	Ssa15	47291370	47295761	-	12	7	NA	NA	((Omy04,Ssa06),(Omy08,Ssa15))	AORe	NA
Ens106s00026.151	A	Omyk	ENSOMYG00000029467	Omy24	9286176	9292710	-	2	2	((Omy24,Ssa09),(Omy27,Ssa20))	AORe	((Omy24,Ssa09),(Omy27,Ssa20))	AORe	NA
Ens106s00026.151	A	Ssal	ENSSSAG00000009969	Ssa09	121305749	121313080	-	2	2	((Omy24,Ssa09),(Omy27,Ssa20))	AORe	((Omy24,Ssa09),(Omy27,Ssa20))	AORe	NA
Ens106s00026.151	B	Ssal	ENSSSAG00000076806	Ssa20	54620064	54642377	-	2	2	((Omy24,Ssa09),(Omy27,Ssa20))	AORe	((Omy24,Ssa09),(Omy27,Ssa20))	AORe	NA
Ens106s00026.151	B	Omyk	ENSOMYG00000046176	Omy27	12139564	12152838	-	2	2	((Omy24,Ssa09),(Omy27,Ssa20))	AORe	((Omy24,Ssa09),(Omy27,Ssa20))	AORe	NA
Ens106s00026.171	A	Ssal	ENSSSAG00000081246	Ssa14	42768826	42792142	+	1	2	((Omy08,Ssa14),(Omy28,Ssa03))	NA	((Omy08,Ssa14),(Omy28,Ssa03))	AORe	NA
Ens106s00026.171	A	Omyk	ENSOMYG00000028662	Omy08	81711284	81736511	+	1	2	((Omy08,Ssa14),(Omy28,Ssa03))	NA	((Omy08,Ssa14),(Omy28,Ssa03))	AORe	NA
Ens106s00026.171	B	Omyk	ENSOMYG00000043249	Omy28	1684151	1696297	-	1	2	((Omy08,Ssa14),(Omy28,Ssa03))	NA	((Omy08,Ssa14),(Omy28,Ssa03))	AORe	NA
Ens106s00026.188	A	Omyk	ENSOMYG00000029475	Omy24	9309031	9330211	-	1	2	((Omy24,Ssa09),(Omy27,Ssa20))	NA	((Omy24,Ssa09),(Omy27,Ssa20))	AORe	NA
Ens106s00026.188	A	Ssal	ENSSSAG00000076819	Ssa09	121319052	121353287	-	1	2	((Omy24,Ssa09),(Omy27,Ssa20))	NA	((Omy24,Ssa09),(Omy27,Ssa20))	AORe	NA
Ens106s00026.188	B	Omyk	ENSOMYG00000046190	Omy27	12163604	12186514	-	1	2	((Omy24,Ssa09),(Omy27,Ssa20))	NA	((Omy24,Ssa09),(Omy27,Ssa20))	AORe	NA
Ens106s00026.208	B	Omyk	ENSOMYG00000014613	Omy12	47816252	47831965	+	2	2	((Omy10,Ssa04),(Omy12,Ssa13))	AORe	((Omy10,Ssa04),(Omy12,Ssa13))	AORe	NA
Ens106s00026.208	B	Ssal	ENSSSAG00000079748	Ssa13	62833218	62862680	-	2	2	((Omy10,Ssa04),(Omy12,Ssa13))	AORe	((Omy10,Ssa04),(Omy12,Ssa13))	AORe	NA
Ens106s00026.208	A	Omyk	ENSOMYG00000031639	Omy10	17522306	17545490	-	2	2	((Omy10,Ssa04),(Omy12,Ssa13))	AORe	((Omy10,Ssa04),(Omy12,Ssa13))	AORe	NA
Ens106s00026.208	A	Ssal	ENSSSAG00000061098	Ssa04	70942897	70974253	+	2	2	((Omy10,Ssa04),(Omy12,Ssa13))	AORe	((Omy10,Ssa04),(Omy12,Ssa13))	AORe	NA
Ens106s00026.229	B	Ssal	ENSSSAG00000005566	Ssa20	49684955	49708853	-	2	2	((Omy24,Ssa09),(Omy27,Ssa20))	AORe	((Omy24,Ssa09),(Omy27,Ssa20))	AORe	NA
Ens106s00026.229	B	Omyk	ENSOMYG00000023252	Omy27	7574801	7606223	-	2	2	((Omy24,Ssa09),(Omy27,Ssa20))	AORe	((Omy24,Ssa09),(Omy27,Ssa20))	AORe	NA
Ens106s00026.229	A	Ssal	ENSSSAG00000102812	Ssa09	116519996	116547335	-	2	2	((Omy24,Ssa09),(Omy27,Ssa20))	AORe	((Omy24,Ssa09),(Omy27,Ssa20))	AORe	NA
Ens106s00026.229	A	Omyk	ENSOMYG00000021622	Omy24	4766058	4819929	-	2	2	((Omy24,Ssa09),(Omy27,Ssa20))	AORe	((Omy24,Ssa09),(Omy27,Ssa20))	AORe	NA
Ens106s00026.249	B	Ssal	ENSSSAG00000103435	Ssa20	49649612	49678161	-	2	1	((Omy24,Ssa09),(Omy27,Ssa20))	NA	((Omy24,Ssa09),(Omy27,Ssa20))	AORe	NA
Ens106s00026.249	B	Omyk	ENSOMYG00000023186	Omy27	7537160	7567083	-	2	1	((Omy24,Ssa09),(Omy27,Ssa20))	NA	((Omy24,Ssa09),(Omy27,Ssa20))	AORe	NA
Ens106s00026.249	A	Ssal	ENSSSAG00000005535	Ssa09	116457363	116511159	-	2	1	((Omy24,Ssa09),(Omy27,Ssa20))	NA	((Omy24,Ssa09),(Omy27,Ssa20))	AORe	NA
Ens106s00026.262	A	Omyk	ENSOMYG00000045330	Omy10	36654075	36660626	-	1	2	((Omy10,Ssa04),(Omy12,Ssa13))	NA	((Omy10,Ssa04),(Omy12,Ssa13))	AORe	NA
Ens106s00026.262	B	Ssal	ENSSSAG00000074851	Ssa13	84243796	84297014	-	1	2	((Omy10,Ssa04),(Omy12,Ssa13))	NA	((Omy10,Ssa04),(Omy12,Ssa13))	AORe	NA
Ens106s00026.262	B	Omyk	ENSOMYG00000005665	Omy12	28303230	28317218	+	1	2	((Omy10,Ssa04),(Omy12,Ssa13))	NA	((Omy10,Ssa04),(Omy12,Ssa13))	AORe	NA
Ens106s00026.274	B	Omyk	ENSOMYG00000005643	Omy12	28276289	28299071	+	1	2	((Omy10,Ssa04),(Omy12,Ssa13))	NA	((Omy10,Ssa04),(Omy12,Ssa13))	AORe	NA
Ens106s00026.274	A	Omyk	ENSOMYG00000045339	Omy10	36674199	36677457	-	1	2	((Omy10,Ssa04),(Omy12,Ssa13))	NA	((Omy10,Ssa04),(Omy12,Ssa13))	AORe	NA
Ens106s00026.274	A	Ssal	ENSSSAG00000045215	Ssa04	50523613	50534105	+	1	2	((Omy10,Ssa04),(Omy12,Ssa13))	NA	((Omy10,Ssa04),(Omy12,Ssa13))	AORe	NA
Ens106s00027.142	NA	Ssal	ENSSSAG00000045139	Ssa04	33147107	33208566	+	1	1	NA	NA	NA	NA	NA
Ens106s00027.142	NA	Omyk	ENSOMYG00000009751	Omy15	43230404	43300329	+	1	1	NA	NA	NA	NA	NA
Ens106s00027.150	A	Omyk	ENSOMYG00000021661	Omy24	16148290	16158501	+	2	2	((Omy24,Ssa09),(Omy27,Ssa20))	AORe	((Omy24,Ssa09),(Omy27,Ssa20))	AORe	NA
Ens106s00027.150	A	Ssal	ENSSSAG00000054078	Ssa09	128301943	128325950	+	2	2	((Omy24,Ssa09),(Omy27,Ssa20))	AORe	((Omy24,Ssa09),(Omy27,Ssa20))	AORe	NA
Ens106s00027.150	B	Omyk	ENSOMYG00000043525	Omy27	18838366	18848991	+	2	2	((Omy24,Ssa09),(Omy27,Ssa20))	AORe	((Omy24,Ssa09),(Omy27,Ssa20))	AORe	NA
Ens106s00027.150	B	Ssal	ENSSSAG00000098270	Ssa20	61956729	61997459	+	2	2	((Omy24,Ssa09),(Omy27,Ssa20))	AORe	((Omy24,Ssa09),(Omy27,Ssa20))	AORe	NA
Ens106s00027.171	A	Ssal	ENSSSAG00000050374	Ssa09	131179471	131191861	-	2	2	((Omy24,Ssa09),(Omy27,Ssa20))	AORe	((Omy24,Ssa09),(Omy27,Ssa20))	AORe	NA
Ens106s00027.171	A	Omyk	ENSOMYG00000017063	Omy24	18775509	18787739	-	2	2	((Omy24,Ssa09),(Omy27,Ssa20))	AORe	((Omy24,Ssa09),(Omy27,Ssa20))	AORe	NA
Ens106s00027.171	B	Ssal	ENSSSAG00000049321	Ssa20	64796010	64808099	-	2	2	((Omy24,Ssa09),(Omy27,Ssa20))	AORe	((Omy24,Ssa09),(Omy27,Ssa20))	AORe	NA
Ens106s00027.171	B	Omyk	ENSOMYG00000040650	Omy27	21682786	21692518	-	2	2	((Omy24,Ssa09),(Omy27,Ssa20))	AORe	((Omy24,Ssa09),(Omy27,Ssa20))	AORe	NA
Ens106s00027.187	A	Omyk	ENSOMYG00000028874	Omy10	34364518	34377544	+	2	2	((Omy10,Ssa04),(Omy12,Ssa13))	AORe	((Omy10,Ssa04),(Omy12,Ssa13))	AORe	NA
Ens106s00027.187	A	Ssal	ENSSSAG00000053636	Ssa04	52848136	52865771	-	2	2	((Omy10,Ssa04),(Omy12,Ssa13))	AORe	((Omy10,Ssa04),(Omy12,Ssa13))	AORe	NA
Ens106s00027.187	B	Omyk	ENSOMYG00000031289	Omy12	30494533	30521603	-	2	2	((Omy10,Ssa04),(Omy12,Ssa13))	AORe	((Omy10,Ssa04),(Omy12,Ssa13))	AORe	NA
Ens106s00027.187	B	Ssal	ENSSSAG00000039344	Ssa13	81821007	81875049	+	2	2	((Omy10,Ssa04),(Omy12,Ssa13))	AORe	((Omy10,Ssa04),(Omy12,Ssa13))	AORe	NA
Ens106s00027.204	B	Ssal	ENSSSAG00000072331	Ssa23	37797373	37819129	-	1	1	((Omy02,Ssa10),(Omy30,Ssa23))	NA	((Omy02,Ssa10),(Omy30,Ssa23))	AORe	FALSE
Ens106s00027.204	B	Omyk	ENSOMYG00000042153	Omy30	12587020	12609399	+	1	1	((Omy02,Ssa10),(Omy30,Ssa23))	NA	((Omy02,Ssa10),(Omy30,Ssa23))	AORe	FALSE
Ens106s00027.217	B	Ssal	ENSSSAG00000055377	Ssa07	39223969	39242805	+	2	2	((Omy15,Ssa17),(Omy21,Ssa07))	AORe	((Omy15,Ssa17),(Omy21,Ssa07))	AORe	NA
Ens106s00027.217	B	Omyk	ENSOMYG00000045311	Omy21	30076500	30090028	-	2	2	((Omy15,Ssa17),(Omy21,Ssa07))	AORe	((Omy15,Ssa17),(Omy21,Ssa07))	AORe	NA
Ens106s00027.217	A	Ssal	ENSSSAG00000073127	Ssa17	54120994	54139830	+	2	2	((Omy15,Ssa17),(Omy21,Ssa07))	AORe	((Omy15,Ssa17),(Omy21,Ssa07))	AORe	NA
Ens106s00027.217	A	Omyk	ENSOMYG00000041597	Omy15	51176551	51197985	+	2	2	((Omy15,Ssa17),(Omy21,Ssa07))	AORe	((Omy15,Ssa17),(Omy21,Ssa07))	AORe	NA
Ens106s00027.237	A	Omyk	ENSOMYG00000019981	Omy09	59506430	59519915	+	2	2	((Omy09,Ssa15),(Omy16,Ssa13))	AORe	((Omy09,Ssa15),(Omy16,Ssa13))	AORe	NA
Ens106s00027.237	A	Ssal	ENSSSAG00000044287	Ssa15	87746844	87759228	+	2	2	((Omy09,Ssa15),(Omy16,Ssa13))	AORe	((Omy09,Ssa15),(Omy16,Ssa13))	AORe	NA
Ens106s00027.237	B	Ssal	ENSSSAG00000044493	Ssa13	36611162	36640556	+	2	2	((Omy09,Ssa15),(Omy16,Ssa13))	AORe	((Omy09,Ssa15),(Omy16,Ssa13))	AORe	NA
Ens106s00027.237	B	Omyk	ENSOMYG00000033284	Omy16	45978901	45991542	-	2	2	((Omy09,Ssa15),(Omy16,Ssa13))	AORe	((Omy09,Ssa15),(Omy16,Ssa13))	AORe	NA
Ens106s00027.256	B	Omyk	ENSOMYG00000067038	Omy05	98283517	98442992	+	1	1	((Omy01,Ssa16),(Omy05,Ssa10))	NA	((Omy01,Ssa16),(Omy05,Ssa10))	AORe	FALSE
Ens106s00027.256	B	Ssal	ENSSSAG00000090648	Ssa10	1573347	1894444	-	1	1	((Omy01,Ssa16),(Omy05,Ssa10))	NA	((Omy01,Ssa16),(Omy05,Ssa10))	AORe	FALSE
Ens106s00028.406	NA	Omyk	ENSOMYG00000036611	Omy13	64487767	64501077	+	66	28	NA	NA	((Omy12,Ssa03),(Omy13,Ssa06))	LORe	NA
Ens106s00028.406	NA	Ssal	ENSSSAG00000114961	SsaCAJNNT020001657.1	82088	91520	-	66	28	NA	NA	NA	NA	NA
Ens106s00028.406	NA	Ssal	ENSSSAG00000098434	SsaCAJNNT020000882.1	923240	942012	+	66	28	NA	NA	NA	NA	NA
Ens106s00028.406	NA	Ssal	ENSSSAG00000105957	Ssa02	76556425	76571978	-	66	28	NA	NA	((Omy13,Ssa02),(Omy17,Ssa12))	cryptic	NA
Ens106s00028.406	NA	Omyk	ENSOMYG00000060988	Omy05	12302845	12305703	-	66	28	NA	NA	((Omy05,Ssa01),(OmyY,Ssa11))	AORe	NA
Ens106s00028.406	NA	Ssal	ENSSSAG00000056437	Ssa03	36129036	36138727	+	66	28	NA	NA	((Omy08,Ssa14),(Omy28,Ssa03))	AORe	NA
Ens106s00028.406	NA	Ssal	ENSSSAG00000084967	SsaCAJNNT020001415.1	4593	89952	-	66	28	NA	NA	NA	NA	NA
Ens106s00028.406	NA	Ssal	ENSSSAG00000088196	SsaCAJNNT020001651.1	97503	276967	-	66	28	NA	NA	NA	NA	NA
Ens106s00028.406	NA	Ssal	ENSSSAG00000120270	SsaCAJNNT020000882.1	581401	587581	+	66	28	NA	NA	NA	NA	NA
Ens106s00028.406	NA	Ssal	ENSSSAG00000104307	Ssa02	87362239	87660143	-	66	28	NA	NA	NA	NA	NA
Ens106s00028.406	NA	Ssal	ENSSSAG00000104031	Ssa02	91181116	91251091	+	66	28	NA	NA	NA	NA	NA
Ens106s00028.406	NA	Ssal	ENSSSAG00000103172	Ssa02	91566728	91585187	+	66	28	NA	NA	((Omy13,Ssa02),(Omy17,Ssa12))	LORe	NA
Ens106s00028.406	NA	Ssal	ENSSSAG00000109170	SsaCAJNNT020002477.1	448332	541230	+	66	28	NA	NA	NA	NA	NA
Ens106s00028.406	NA	Ssal	ENSSSAG00000088838	SsaCAJNNT020000882.1	227532	944031	+	66	28	NA	NA	NA	NA	NA
Ens106s00028.406	NA	Ssal	ENSSSAG00000111885	SsaCAJNNT020000882.1	600385	624721	-	66	28	NA	NA	NA	NA	NA
Ens106s00028.406	NA	Ssal	ENSSSAG00000119829	SsaCAJNNT020002412.1	65165	72892	+	66	28	NA	NA	NA	NA	NA
Ens106s00028.406	NA	Ssal	ENSSSAG00000086032	Ssa03	102918807	103037995	-	66	28	NA	NA	NA	NA	NA
Ens106s00028.406	NA	Ssal	ENSSSAG00000100682	SsaCAJNNT020001807.1	278227	369976	+	66	28	NA	NA	NA	NA	NA
Ens106s00028.406	NA	Ssal	ENSSSAG00000119320	SsaCAJNNT020004195.1	324581	423350	+	66	28	NA	NA	NA	NA	NA
Ens106s00028.406	NA	Ssal	ENSSSAG00000121308	SsaCAJNNT020001949.1	11717	38740	-	66	28	NA	NA	NA	NA	NA
Ens106s00028.406	NA	Ssal	ENSSSAG00000120429	Ssa03	103541556	103668847	+	66	28	NA	NA	NA	NA	NA
Ens106s00028.406	NA	Ssal	ENSSSAG00000108141	SsaCAJNNT020001769.1	128200	290506	-	66	28	NA	NA	NA	NA	NA
Ens106s00028.406	NA	Ssal	ENSSSAG00000103612	SsaCAJNNT020001869.1	136087	145870	+	66	28	NA	NA	NA	NA	NA
Ens106s00028.406	NA	Ssal	ENSSSAG00000026466	SsaCAJNNT020002092.1	66437	115322	+	66	28	NA	NA	NA	NA	NA
Ens106s00028.406	NA	Ssal	ENSSSAG00000086828	SsaCAJNNT020002019.1	1138264	1445319	+	66	28	NA	NA	NA	NA	NA
Ens106s00028.406	NA	Ssal	ENSSSAG00000049489	Ssa02	84619943	84667677	-	66	28	NA	NA	((Omy13,Ssa02),(Omy17,Ssa12))	LORe	NA
Ens106s00028.406	NA	Ssal	ENSSSAG00000112469	SsaCAJNNT020001769.1	17349	281367	+	66	28	NA	NA	NA	NA	NA
Ens106s00028.406	NA	Ssal	ENSSSAG00000092748	SsaCAJNNT020002404.1	1625	49511	-	66	28	NA	NA	NA	NA	NA
Ens106s00028.406	NA	Ssal	ENSSSAG00000114807	SsaCAJNNT020000898.1	207359	328148	+	66	28	NA	NA	NA	NA	NA
Ens106s00028.406	NA	Omyk	ENSOMYG00000027879	Omy17	2782889	2832813	-	66	28	NA	NA	((Omy13,Ssa02),(Omy17,Ssa12))	LORe	NA
Ens106s00028.406	NA	Omyk	ENSOMYG00000005196	Omy13	595908	635049	-	66	28	NA	NA	((Omy13,Ssa02),(Omy17,Ssa12))	LORe	NA
Ens106s00028.406	NA	Ssal	ENSSSAG00000064461	SsaCAJNNT020002019.1	797044	841208	-	66	28	NA	NA	NA	NA	NA
Ens106s00028.406	NA	Ssal	ENSSSAG00000094479	SsaCAJNNT020002092.1	50071	125705	-	66	28	NA	NA	NA	NA	NA
Ens106s00028.406	NA	Ssal	ENSSSAG00000117568	SsaCAJNNT020000898.1	282131	335778	-	66	28	NA	NA	NA	NA	NA
Ens106s00028.406	NA	Ssal	ENSSSAG00000106377	SsaCAJNNT020001651.1	455385	474957	+	66	28	NA	NA	NA	NA	NA
Ens106s00028.406	NA	Ssal	ENSSSAG00000109261	Ssa02	85721787	85806204	-	66	28	NA	NA	NA	NA	NA
Ens106s00028.406	NA	Omyk	ENSOMYG00000069158	Omy13	28009348	28103583	-	66	28	NA	NA	((Omy13,Ssa02),(Omy17,Ssa12))	AORe	NA
Ens106s00028.406	NA	Ssal	ENSSSAG00000099120	SsaCAJNNT020001869.1	57939	107466	+	66	28	NA	NA	NA	NA	NA
Ens106s00028.406	NA	Ssal	ENSSSAG00000114083	Ssa03	105260972	105612207	+	66	28	NA	NA	NA	NA	NA
Ens106s00028.406	NA	Ssal	ENSSSAG00000046437	SsaCAJNNT020000907.1	140475	270544	-	66	28	NA	NA	NA	NA	NA
Ens106s00028.406	NA	Omyk	ENSOMYG00000017607	Omy07	29033270	29098395	+	66	28	NA	NA	NA	NA	NA
Ens106s00028.406	NA	Ssal	ENSSSAG00000115895	SsaCAJNNT020000885.1	345947	437171	+	66	28	NA	NA	NA	NA	NA
Ens106s00028.406	NA	Ssal	ENSSSAG00000112703	Ssa02	80304914	80312552	+	66	28	NA	NA	((Omy13,Ssa02),(Omy17,Ssa12))	AORe	NA
Ens106s00028.406	NA	Ssal	ENSSSAG00000099261	Ssa02	80281460	80298896	+	66	28	NA	NA	((Omy13,Ssa02),(Omy17,Ssa12))	AORe	NA
Ens106s00028.406	NA	Omyk	ENSOMYG00000056918	Omy13	64540356	64674909	-	66	28	NA	NA	((Omy12,Ssa03),(Omy13,Ssa06))	LORe	NA
Ens106s00028.406	NA	Omyk	ENSOMYG00000057147	Omy12	94379030	94381390	-	66	28	NA	NA	((Omy12,Ssa03),(Omy13,Ssa06))	LORe	NA
Ens106s00028.406	NA	Omyk	ENSOMYG00000026551	Omy13	64713398	64773774	+	66	28	NA	NA	((Omy12,Ssa03),(Omy13,Ssa06))	LORe	NA
Ens106s00028.406	NA	Omyk	ENSOMYG00000048456	Omy12	94325836	94506264	+	66	28	NA	NA	((Omy12,Ssa03),(Omy13,Ssa06))	LORe	NA
Ens106s00028.406	NA	Omyk	ENSOMYG00000049710	Omy12	94523660	94541932	+	66	28	NA	NA	((Omy12,Ssa03),(Omy13,Ssa06))	LORe	NA
Ens106s00028.406	NA	Ssal	ENSSSAG00000106993	Ssa02	70969319	70992809	-	66	28	NA	NA	((Omy13,Ssa02),(Omy17,Ssa12))	LORe	NA
Ens106s00028.406	NA	Omyk	ENSOMYG00000005758	Omy13	8870687	9056889	-	66	28	NA	NA	((Omy13,Ssa02),(Omy17,Ssa12))	LORe	NA
Ens106s00028.406	NA	Omyk	ENSOMYG00000007808	Omy17	16527690	16586769	-	66	28	NA	NA	((Omy13,Ssa02),(Omy17,Ssa12))	LORe	NA
Ens106s00028.406	NA	Ssal	ENSSSAG00000004171	Ssa12	18845147	18852159	+	66	28	NA	NA	((Omy13,Ssa02),(Omy17,Ssa12))	LORe	NA
Ens106s00028.406	NA	Ssal	ENSSSAG00000009649	Ssa12	18867637	18874211	+	66	28	NA	NA	((Omy13,Ssa02),(Omy17,Ssa12))	LORe	NA
Ens106s00028.406	NA	Omyk	ENSOMYG00000065150	Omy13	9006798	9026822	+	66	28	NA	NA	((Omy13,Ssa02),(Omy17,Ssa12))	LORe	NA
Ens106s00028.406	NA	Omyk	ENSOMYG00000047896	Omy17	16591705	16643984	+	66	28	NA	NA	((Omy13,Ssa02),(Omy17,Ssa12))	LORe	NA
Ens106s00028.406	NA	Ssal	ENSSSAG00000109486	Ssa02	69006415	69023909	+	66	28	NA	NA	((Omy13,Ssa02),(Omy17,Ssa12))	LORe	NA
Ens106s00028.406	NA	Ssal	ENSSSAG00000004219	Ssa12	18675890	18891772	+	66	28	NA	NA	((Omy13,Ssa02),(Omy17,Ssa12))	LORe	NA
Ens106s00028.406	NA	Ssal	ENSSSAG00000111892	Ssa12	18612178	18679569	+	66	28	NA	NA	((Omy13,Ssa02),(Omy17,Ssa12))	LORe	NA
Ens106s00028.406	NA	Ssal	ENSSSAG00000001386	Ssa02	68480951	68520451	-	66	28	NA	NA	((Omy13,Ssa02),(Omy17,Ssa12))	LORe	NA
Ens106s00028.406	NA	Ssal	ENSSSAG00000088966	Ssa12	19232349	19252037	-	66	28	NA	NA	((Omy13,Ssa02),(Omy17,Ssa12))	LORe	NA
Ens106s00028.406	NA	Ssal	ENSSSAG00000004228	Ssa02	68539777	68564845	-	66	28	NA	NA	((Omy13,Ssa02),(Omy17,Ssa12))	LORe	NA
Ens106s00028.406	NA	Omyk	ENSOMYG00000063963	Omy17	16653273	16658429	-	66	28	NA	NA	((Omy13,Ssa02),(Omy17,Ssa12))	LORe	NA
Ens106s00028.406	NA	Omyk	ENSOMYG00000060047	Omy13	9035508	9040694	-	66	28	NA	NA	((Omy13,Ssa02),(Omy17,Ssa12))	LORe	NA
Ens106s00028.406	NA	Omyk	ENSOMYG00000035969	Omy13	789401	798330	-	66	28	NA	NA	((Omy13,Ssa02),(Omy17,Ssa12))	LORe	NA
Ens106s00028.406	NA	Omyk	ENSOMYG00000074836	Omy13	1865615	1926088	+	66	28	NA	NA	((Omy13,Ssa02),(Omy17,Ssa12))	LORe	NA
Ens106s00028.406	NA	Omyk	ENSOMYG00000077556	Omy17	2910981	3160112	+	66	28	NA	NA	((Omy13,Ssa02),(Omy17,Ssa12))	LORe	NA
Ens106s00028.406	NA	Omyk	ENSOMYG00000048850	Omy13	773603	787124	-	66	28	NA	NA	((Omy13,Ssa02),(Omy17,Ssa12))	LORe	NA
Ens106s00028.406	NA	Omyk	ENSOMYG00000004033	Omy13	26618480	26660314	-	66	28	NA	NA	((Omy13,Ssa02),(Omy17,Ssa12))	AORe	NA
Ens106s00028.406	NA	Omyk	ENSOMYG00000070653	Omy13	1248350	1344951	-	66	28	NA	NA	((Omy13,Ssa02),(Omy17,Ssa12))	LORe	NA
Ens106s00028.406	NA	Omyk	ENSOMYG00000005121	Omy13	1271291	1280632	+	66	28	NA	NA	((Omy13,Ssa02),(Omy17,Ssa12))	LORe	NA
Ens106s00028.406	NA	Omyk	ENSOMYG00000066114	Omy17	3048068	3413161	-	66	28	NA	NA	((Omy13,Ssa02),(Omy17,Ssa12))	LORe	NA
Ens106s00028.406	NA	Ssal	ENSSSAG00000114253	SsaCAJNNT020002028.1	188083	281039	+	66	28	NA	NA	NA	NA	NA
Ens106s00028.406	NA	Ssal	ENSSSAG00000105763	Ssa03	102406881	102663135	-	66	28	NA	NA	NA	NA	NA
Ens106s00028.406	NA	Omyk	ENSOMYG00000004070	Omy13	756452	972984	+	66	28	NA	NA	((Omy13,Ssa02),(Omy17,Ssa12))	LORe	NA
Ens106s00028.406	NA	Ssal	ENSSSAG00000104463	SsaCAJNNT020001900.1	104543	214798	-	66	28	NA	NA	NA	NA	NA
Ens106s00028.406	NA	Ssal	ENSSSAG00000090016	SsaCAJNNT020001286.1	62879	142544	+	66	28	NA	NA	NA	NA	NA
Ens106s00028.406	NA	Ssal	ENSSSAG00000119934	Ssa02	89432355	89676383	-	66	28	NA	NA	NA	NA	NA
Ens106s00028.406	NA	Omyk	ENSOMYG00000001278	Omy07	29551875	29701446	+	66	28	NA	NA	((Omy07,Ssa22),(Omy17,Ssa12))	AORe	NA
Ens106s00028.406	NA	Ssal	ENSSSAG00000082164	SsaCAJNNT020000871.1	371274	466266	-	66	28	NA	NA	NA	NA	NA
Ens106s00028.406	NA	Ssal	ENSSSAG00000092935	SsaCAJNNT020002065.1	40619	52654	+	66	28	NA	NA	NA	NA	NA
Ens106s00028.406	NA	Ssal	ENSSSAG00000101896	Ssa01	122893487	122958551	+	66	28	NA	NA	((Omy05,Ssa01),(Omy12,Ssa13))	AORe	NA
Ens106s00028.406	NA	Ssal	ENSSSAG00000112265	SsaCAJNNT020001591.1	151141	217624	-	66	28	NA	NA	NA	NA	NA
Ens106s00028.406	NA	Ssal	ENSSSAG00000083742	Ssa02	89999368	90242192	-	66	28	NA	NA	NA	NA	NA
Ens106s00028.406	NA	Ssal	ENSSSAG00000120285	SsaCAJNNT020001415.1	18995	74210	+	66	28	NA	NA	NA	NA	NA
Ens106s00028.406	NA	Ssal	ENSSSAG00000085956	Ssa03	102473145	102971545	+	66	28	NA	NA	NA	NA	NA
Ens106s00028.406	NA	Ssal	ENSSSAG00000101925	SsaCAJNNT020000885.1	24697	334044	+	66	28	NA	NA	NA	NA	NA
Ens106s00028.406	NA	Omyk	ENSOMYG00000061145	Omy13	25834509	25958136	-	66	28	NA	NA	((Omy13,Ssa02),(Omy17,Ssa12))	AORe	NA
Ens106s00028.406	NA	Ssal	ENSSSAG00000110760	SsaCAJNNT020001981.1	272326	483777	+	66	28	NA	NA	NA	NA	NA
Ens106s00028.406	NA	Ssal	ENSSSAG00000091151	SsaCAJNNT020001296.1	80892	291366	+	66	28	NA	NA	NA	NA	NA
Ens106s00028.406	NA	Ssal	ENSSSAG00000082315	SsaCAJNNT020000871.1	452274	482466	+	66	28	NA	NA	NA	NA	NA
Ens106s00028.406	NA	Ssal	ENSSSAG00000091940	SsaCAJNNT020002404.1	185462	215496	-	66	28	NA	NA	NA	NA	NA
Ens106s00028.406	NA	Ssal	ENSSSAG00000115508	Ssa12	3460903	3689338	-	66	28	NA	NA	((Omy13,Ssa02),(Omy17,Ssa12))	LORe	NA
Ens106s00028.406	NA	Ssal	ENSSSAG00000094449	SsaCAJNNT020004199.1	125321	236710	+	66	28	NA	NA	NA	NA	NA
Ens106s00028.641	NA	Ssal	ENSSSAG00000102676	SsaCAJNNT020001949.1	471	5224	+	1	0	NA	NA	NA	NA	NA
Ens106s00028.647	NA	Ssal	ENSSSAG00000007834	Ssa02	81157022	81168893	-	2	4	NA	NA	NA	NA	NA
Ens106s00028.647	NA	Omyk	ENSOMYG00000038248	OmyJAAXML020000334.1	180100	427389	+	2	4	NA	NA	NA	NA	NA
Ens106s00028.647	NA	Omyk	ENSOMYG00000039014	OmyJAAXML020000344.1	253936	444965	-	2	4	NA	NA	NA	NA	NA
Ens106s00028.647	NA	Omyk	ENSOMYG00000053816	Omy13	570429	623478	-	2	4	NA	NA	((Omy13,Ssa02),(Omy17,Ssa12))	LORe	NA
Ens106s00028.647	NA	Omyk	ENSOMYG00000062805	Omy17	2754256	2773440	-	2	4	NA	NA	((Omy13,Ssa02),(Omy17,Ssa12))	LORe	NA
Ens106s00028.647	NA	Ssal	ENSSSAG00000118667	Ssa02	92330667	92348319	-	2	4	NA	NA	((Omy13,Ssa02),(Omy17,Ssa12))	LORe	NA
Ens106s00028.661	NA	Ssal	ENSSSAG00000000498	Ssa02	80037041	80073184	-	3	0	NA	NA	((Omy13,Ssa02),(Omy17,Ssa12))	AORe	NA
Ens106s00028.661	NA	Ssal	ENSSSAG00000004234	Ssa12	8288250	8297480	+	3	0	NA	NA	((Omy13,Ssa02),(Omy17,Ssa12))	AORe	NA
Ens106s00028.661	NA	Ssal	ENSSSAG00000000489	Ssa02	80075544	80088727	-	3	0	NA	NA	((Omy13,Ssa02),(Omy17,Ssa12))	AORe	NA
Ens106s00028.669	NA	Omyk	ENSOMYG00000061999	OmyJAAXML020000334.1	454669	515112	+	0	1	NA	NA	NA	NA	NA
Ens106s00028.672	B	Omyk	ENSOMYG00000031975	Omy23	17422574	17423974	-	2	1	((Omy01,Ssa18),(Omy23,Ssa01))	NA	((Omy01,Ssa18),(Omy23,Ssa01))	AORe	NA
Ens106s00028.672	B	Ssal	ENSSSAG00000107433	Ssa01	56823725	56829945	-	2	1	((Omy01,Ssa18),(Omy23,Ssa01))	NA	((Omy01,Ssa18),(Omy23,Ssa01))	AORe	NA
Ens106s00028.672	A	Ssal	ENSSSAG00000103008	Ssa18	12675946	12691623	-	2	1	((Omy01,Ssa18),(Omy23,Ssa01))	NA	((Omy01,Ssa18),(Omy23,Ssa01))	AORe	NA
Ens106s00028.680	NA	Omyk	ENSOMYG00000059352	Omy17	2154914	2173702	-	0	1	NA	NA	((Omy13,Ssa02),(Omy17,Ssa12))	LORe	NA
Ens106s00028.687	NA	Ssal	ENSSSAG00000063426	Ssa08	9144559	9145707	+	6	4	NA	NA	((Omy10,Ssa04),(Omy19,Ssa08))	AORe	NA
Ens106s00028.687	NA	Ssal	ENSSSAG00000096846	Ssa08	7644940	7648656	+	6	4	NA	NA	((Omy10,Ssa04),(Omy19,Ssa08))	AORe	NA
Ens106s00028.687	NA	Omyk	ENSOMYG00000006798	Omy19	16834787	16835731	-	6	4	NA	NA	((Omy10,Ssa04),(Omy19,Ssa08))	AORe	NA
Ens106s00028.687	NA	Ssal	ENSSSAG00000101806	Ssa08	7892105	7909813	+	6	4	NA	NA	((Omy10,Ssa04),(Omy19,Ssa08))	AORe	NA
Ens106s00028.687	NA	Ssal	ENSSSAG00000095096	Ssa08	8072644	8084034	+	6	4	NA	NA	((Omy10,Ssa04),(Omy19,Ssa08))	AORe	NA
Ens106s00028.687	NA	Omyk	ENSOMYG00000003488	Omy10	62339996	62367441	+	6	4	NA	NA	((Omy10,Ssa04),(Omy19,Ssa08))	AORe	NA
Ens106s00028.687	NA	Omyk	ENSOMYG00000004179	Omy10	62492957	62542047	+	6	4	NA	NA	((Omy10,Ssa04),(Omy19,Ssa08))	AORe	NA
Ens106s00028.687	NA	Ssal	ENSSSAG00000102489	Ssa08	10106171	10111865	+	6	4	NA	NA	((Omy10,Ssa04),(Omy19,Ssa08))	AORe	NA
Ens106s00028.687	NA	Ssal	ENSSSAG00000085391	Ssa04	18039993	18078661	-	6	4	NA	NA	((Omy10,Ssa04),(Omy19,Ssa08))	AORe	NA
Ens106s00028.687	NA	Omyk	ENSOMYG00000004219	Omy10	64167466	64168503	+	6	4	NA	NA	((Omy10,Ssa04),(Omy19,Ssa08))	AORe	NA
Ens106s00028.710	A	Omyk	ENSOMYG00000015030	Omy13	1957490	1959070	+	0	2	((Omy13,Ssa02),(Omy17,Ssa12))	NA	((Omy13,Ssa02),(Omy17,Ssa12))	LORe	NA
Ens106s00028.710	B	Omyk	ENSOMYG00000060317	Omy17	3909780	3911360	+	0	2	((Omy13,Ssa02),(Omy17,Ssa12))	NA	((Omy13,Ssa02),(Omy17,Ssa12))	LORe	NA
Ens106s00028.719	NA	Omyk	ENSOMYG00000025438	OmyJAAXML020000856.1	382307	394720	-	1	1	NA	NA	NA	NA	NA
Ens106s00028.719	NA	Ssal	ENSSSAG00000073297	Ssa12	37952045	37982678	-	1	1	NA	NA	((Omy13,Ssa02),(Omy17,Ssa12))	AORe	NA
Ens106s00028.324	NA	Ssal	ENSSSAG00000093181	Ssa02	88104869	88111772	+	1	0	NA	NA	NA	NA	NA
Ens106s00028.727	NA	Omyk	ENSOMYG00000064997	Omy17	1789527	1793102	+	1	1	NA	NA	((Omy13,Ssa02),(Omy17,Ssa12))	LORe	NA
Ens106s00028.727	NA	Ssal	ENSSSAG00000095584	SsaCAJNNT020000871.1	169235	273219	-	1	1	NA	NA	NA	NA	NA
Ens106s00028.731	NA	Ssal	ENSSSAG00000093676	Ssa12	8092492	8102049	+	2	0	NA	NA	((Omy13,Ssa02),(Omy17,Ssa12))	AORe	NA
Ens106s00028.731	NA	Ssal	ENSSSAG00000109416	SsaCAJNNT020001656.1	50051	199194	-	2	0	NA	NA	NA	NA	NA
Ens106s00028.737	NA	Ssal	ENSSSAG00000006660	Ssa07	56613254	56617767	-	1	2	NA	NA	((Omy15,Ssa17),(Omy21,Ssa07))	cryptic	NA
Ens106s00028.737	NA	Omyk	ENSOMYG00000011198	Omy21	13031877	13033796	+	1	2	NA	NA	((Omy15,Ssa17),(Omy21,Ssa07))	LORe	NA
Ens106s00028.737	NA	Omyk	ENSOMYG00000044528	Omy23	46437038	46438138	-	1	2	NA	NA	((Omy20,Ssa28),(Omy23,Ssa01))	AORe	NA
Ens106s00028.751	B	Ssal	ENSSSAG00000085503	Ssa02	24756206	24763219	-	1	2	((Omy02,Ssa05),(Omy03,Ssa02))	NA	((Omy02,Ssa05),(Omy03,Ssa02))	AORe	NA
Ens106s00028.751	B	Omyk	ENSOMYG00000002916	Omy03	13986628	13992880	-	1	2	((Omy02,Ssa05),(Omy03,Ssa02))	NA	((Omy02,Ssa05),(Omy03,Ssa02))	AORe	NA
Ens106s00028.751	A	Omyk	ENSOMYG00000024510	Omy02	22839878	22845431	-	1	2	((Omy02,Ssa05),(Omy03,Ssa02))	NA	((Omy02,Ssa05),(Omy03,Ssa02))	AORe	NA
Ens106s00028.764	NA	Ssal	ENSSSAG00000003674	Ssa09	74414328	74422813	-	1	0	NA	NA	((Omy14,Ssa05),(Omy31,Ssa09))	AORe	NA
Ens106s00028.772	NA	Omyk	ENSOMYG00000016777	Omy03	30592095	30593887	-	0	1	NA	NA	((Omy02,Ssa05),(Omy03,Ssa02))	AORe	NA
[truncated: 93,579 more rows]

## Sheet: Table S6
Ssal_A-chr	Ssal_A-start	Ssal_A-end	Omyk_A-chr	Omyk_A-start	Omyk_A-end	Ssal_B-chr	Ssal_B-start	Ssal_B-end	Omyk_B-chr	Omyk_B-start	Omyk_B-end	Eluc-chr	Eluc-start	Eluc-end
[truncated: 113 more rows]

[truncated: 16 more sheets: Table S7, Table S8, Table S9, Table S10, Table S11, Table S12, Table S13, Table S14, Table S15, Table S16, Table S17, Table S18, Table S19, Table S20, Table S21, Table S22]
